# Supplementary material
Source: PubMed Central journal article supplement (PMC4106372)
Supplement: NIHMS608063-supplement-Supplementary_data_1.pdf [file NIHMS608063-supplement-Supplementary_data_1.pdf]

**Table :** Medaka full length cDNA libraries (<http://www.shigen.nig.ac.jp>)

| <b>Library</b> | <b>Tissue</b> | <b>5' Sequences</b> | <b>3' Sequences</b> | <b>Total Sequences</b> |
|----------------|---------------|---------------------|---------------------|------------------------|
| <b>olea</b>    | Embryo        | 22258               | 22215               | 44473                  |
| <b>oleb</b>    | Embryo        | 23134               | 23127               | 46261                  |
| <b>olec</b>    | Larvae        | 23000               | 23138               | 46138                  |
| <b>olvl</b>    | Liver         | 18867               | 18978               | 37845                  |
| <b>olli</b>    | Liver         | 23315               | 23534               | 46849                  |
| <b>olbr</b>    | Brain         | 22582               | 22442               | 45024                  |
| <b>olgi</b>    | Gill          | 22803               | 22826               | 45269                  |
| <b>olki</b>    | Kidney        | 23150               | 22979               | 46129                  |
| <b>olsp</b>    | Spleen        | 23402               | 23433               | 46835                  |
| <b>olte</b>    | Testis        | 24301               | 24342               | 48643                  |
| <b>olova</b>   | Ovary         | 22934               | 23184               | 46118                  |
