# Supplementary material
Source: PubMed Central journal article supplement (PMC4106372)
Supplement: NIHMS608063-supplement-Supplementary_data_2.pdf [file NIHMS608063-supplement-Supplementary_data_2.pdf]

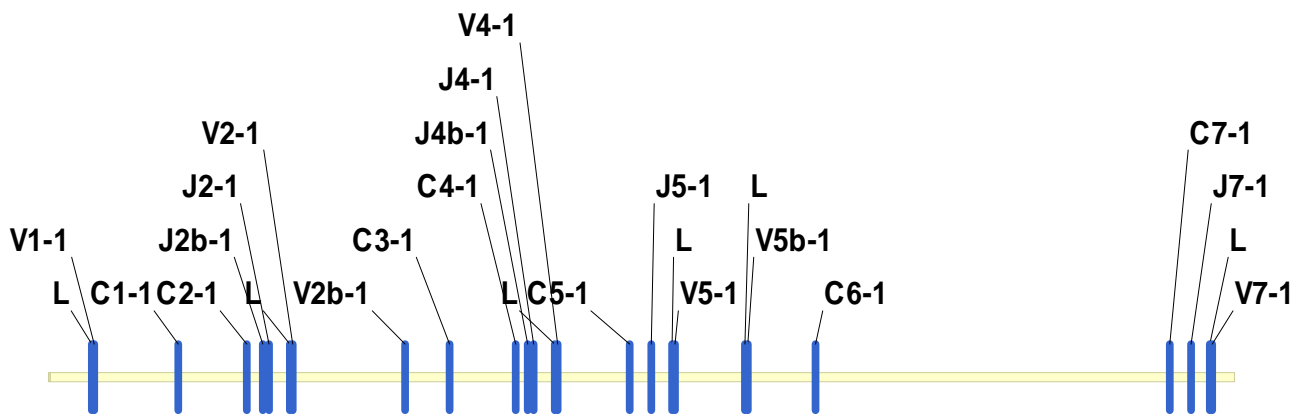

**IGL1**  
68247 bp

**LOCUS** **IGL1** **68247 bp** **DNA** **linear**  
**DEFINITION** Medaka Immunoglobulin light chain locus 1.  
**SOURCE** *Oryzias latipes* (Japanese medaka)  
**ORGANISM** *Oryzias latipes*

Eukaryota; Metazoa; Chordata; Craniata; Vertebrata; Euteleostomi;  
Actinopterygii; Neopterygii; Teleostei; Euteleostei; Neoteleostei;  
Acanthomorpha; Acanthopterygii; Percomorpha; Atherinomorpha;  
Beloniformes; Adrianichthyidae; Oryziinae; *Oryzias*.

| FEATURES     | Location/Qualifiers                                                |
|--------------|--------------------------------------------------------------------|
| source       | 1..68247<br>/organism="Oryzias latipes"<br>/mol_type="genomic DNA" |
| J_segment    | complement(657..65777)<br>/product="J7-1"                          |
| misc_feature | 2388..2439<br>/note="Region: Leader"                               |
| V_segment    | 2547..2870<br>/product="V1-1"                                      |
| C_region     | complement(7388..7698)<br>/product="C1-1"                          |
| C_region     | complement(11335..11644)<br>/product="C2-1"                        |
| J_segment    | complement(12258..12297)<br>/product="J2b-1"                       |
| J_segment    | complement(12599..12636)<br>/product="J2-1"                        |
| misc_feature | 13811..13862<br>/note="Region: Leader"                             |
| V_segment    | 13968..14291<br>/product="V2-1"                                    |
| V_segment    | 20443..20766<br>/product="V2b-1"                                   |
| C_region     | complement(23006..23328)<br>/product="C3-1"                        |
| C_region     | complement(26833..27161)<br>/product="C4-1"                        |
| J_segment    | complement(27515..27554)<br>/product="J4b-1"                       |
| J_segment    | complement(27862..27899)<br>/product="J4-1"                        |
| misc_feature | 29075..29126<br>/note="Region: Leader"                             |
| V_segment    | 29234..29557<br>/product="V4-1"                                    |
| C_region     | complement(33401..33726)<br>/product="C5-1"                        |
| J_segment    | complement(34641..34678)<br>/product="J5-1"                        |
| misc_feature | 35843..35894<br>/note="Region: Leader"                             |
| V_segment    | 36002..36328<br>/product="V5-1"                                    |
| misc_feature | 40050..40101<br>/note="Region: Leader"                             |
| V_segment    | 40209..40532<br>/product="V5b-1"                                   |
| C_region     | 44113..44444<br>/product="C6-1"                                    |

C\_region complement(64527..64843)  
 /product="C7-1"  
 misc\_feature 66822..66873  
 /note="Region: Leader"  
 V\_segment 66981..67304  
 /product="V7-1"

BASE COUNT 20465 a 13959 c 13376 g 20073 t 374 others

ORIGIN

1 tataggttaa ttggtactct aaattgactc taggagtgaa tgtgagtgtg cgtgatttgt  
 61 ggccctggga tagaatggcg acctgtgcaa aatgtcccct gccttcaccc acaagtggcc  
 121 gggataggct ccagcagtag aggcgagcca gagacaaggt acatggtcag gtacgggagc  
 181 acggatgagc caactggaat ctggaaacac gagtgggaaa gagggaaaagc aaacagaggc  
 241 atggataact aaatgatgaa taataatcaa gaataaagga gagaaggaga gtagaagtag  
 301 aggatagaac cccagtgcac catagttacc ccagcttcaa cttctagcag cctactaata  
 361 taatataaaa acaaccaagt gtatcacatc agaaaacaca cacgtgatgc agcaaaaatg  
 421 gatcaggcca tcaatccagt ccaatgagtg aaaagacttt gaatttagca aagtcatgtg  
 481 accatacagt gtgctagaac gttccaagac tgttcccttt ggattcttag gatgtggaaa  
 541 aaaccagtgg accgaacttt aggaaactca aacgtgaatg gatttgacac tcattgttta  
 601 cttgtttgtt tgtaaacatg tttattgtat acttatctat aagaaatcca aggagtcaaa  
 661 aaacttcacc agctctgtcc aggaccaggt atttctgagt ctcacggttg aagttttggc  
 721 taagatgtc ctggatccat tttagatcag tgaaccata tcgaaattga attaaatcaa  
 781 tcacaaat ataatcaaatt gttggtgaaa ttaattacac ccctatttct ttttttaca  
 841 agtcccaaac attcctgaga tgctcctagt tttatgtaat cccaaaatgc cggtattttc  
 901 tataggaggc cagaacagtc ttataattca gaattgcaca cactcggagt cacaaataca  
 961 cacacttcta ttcacatggt gcaaaatatt tacttgagtc ctatgtcgtc ccaacttgtg  
 1021 cgtatggatt tataagggac ccagtcctct ctgaagggtga ataaagtaaa ttctgtaaag  
 1081 cgcttattaa agtggagtcca tgtgtgtata tattaaaatg tcatctttga agtgttgagt  
 1141 ttattctttt tcacaaacca cttctctgag aatttggaga gaaaaaatg tggcttggat  
 1201 taaaaataaa aaaaaaacca cattacccca cactagaaat gtgtctagt ctattatta  
 1261 caaaaataaa aattgagtaa ttttaatgca tagatgtata atcaactata gaattaaaac  
 1321 aattctcatt ttgaattagt tcagtttatt atttctacat ttttttaata aacattttat  
 1381 tgaagtacat aattcagaga gttcccaaaa agattgaatt aaattaactt tagttaattg  
 1441 ataaaaaac agtttttact gtttgtgggg cactacttgg tgtcgtctag caggaaagct  
 1501 ttgtccttta agaagcctaa ttgacattct ccatttaatc cctaaaatga taatatttta  
 1561 tcagataaaa acagagtaag gaccaaactt gcagtccttg ctctttgta cacctagagg  
 1621 gatctttagt gcctcatttc agtgtaaatg gaaggaaact atttgggtgg aaaacaactt  
 1681 taaataacaa ttactttaca ttgttttaaa gctgtacaag tctaaatgga tcaacactaa  
 1741 agccactggc cagttctctt tgcactctaa agatcagaag atttttattt atttttttt  
 1801 aaaccataaa aagaaactgt tggatatttg ccacagtttg gggttaaaga cagaaaataa  
 1861 cataaaaaac tgcactctgca ttcagattaa attctgtgga tgaaaaggat taagagtttg  
 1921 tatattttgg agagagtttt gttaatgaa aatttaatca gagaggtaac ttcttttgg  
 1981 ggcttttaaa ttgtatttta tttaaacttt ttagtaataa tggatttaag ttttaagtat  
 2041 tccaaaaagt tattttattcc acatttgtct tgaagttccc ggggagttat gaatctgaa  
 2101 tcaataatta agtgctctag tgttacgcc cctgcttgcc aagatgggaa gtgaatcatt  
 2161 ttttttgtt gaggatgtcc gggtttttcc agatgagtg cattttgac ggttgaagtg  
 2221 atgatttatt tttttttaga tagacacttt gcatcagcag ctccatgctc cagtgtctg  
 2281 ggagacttta tagtctgac agttgaagac tggatgactg acagctgtcc ttcacacag  
 2341 cagaagacac agaaatcctc ctctcctcc tctcttctc ccaaaacatg agtgtgatg  
 2401 gcgtcctcat ctggactctc ctctgctgct gcttcacagg taaagtcaag agaatccaac  
 2461 tctctcctc tatgaacatc cgtccctctg aaatgaaggc cacaaaagca tgaagctgct  
 2521 ttctgtttct gtctctgtct cctcagagtc cagaggacag gtcacagtga ctcagcctgg  
 2581 agcagtgagc tctgctgtgg gaggaatgt ctccatctca tgcaggacca gtcaggatgt  
 2641 taactattgg aacagctttt acattttatc ctggttccaa cagaaagatg gagaatctcc  
 2701 taactactc atttaccgtg ctagctctcg acaatcaggg attccaagt gttttacagg  
 2761 cagtggatca aactctgatt tcaactctgac catcagtgga attcaggctg aagatgcagc  
 2821 agtttattac tgtctggctg aattcaaaat cagcagcaca ttctcgttca cacagtgaaa  
 2881 aacagtctga caaaaacctc tgtcagtcag agagaacaga aactgatctg atacagttca  
 2941 atgaagacac acacacacac acacacacac ccacacacac acacacacac acacacacac  
 3001 acttttacta caactacaca taggttaact ttatggcatt attttggagt ctgtggaaac  
 3061 aaagaacctg tggaaatttcg tctcctgca ctgtgggagt ctccgtctg caactgtct  
 3121 ctaaagattt tgtgtcagc ttccactgac tgggtcgtgt ggtgaaggag aagtttttaa  
 3181 tgctgtcatt tagtttgact gacatcctcc tctgtttgt tgaatctctg tcagagcttt  
 3241 ttgaaccatt gctctggagg agctgaaacc actgagacct aaaaggtttt tagcatgagg  
 3301 cgtgccgact tcagaggaac cggatctact catgagagga aagaggctgt ggtcgtctt  
 3361 gtaaagggca tcagtgtcca ctatattagc aaaagtattg actcacctgc cttgactctc

3421 atatgaactg aagttccatc catttcctaa cccatacagt ccaatatgat gtgggtccat  
3481 cttttacagc ttcaattctt ctgggaagac cacaaagtgg agtgtttcta ggaatthtgt  
3541 accattcttc caaaagggtca ttgggtgaagt cacactgatg ttgggtggaga gggcctggct  
3601 ctcaactctc gctctaattc atcccaagg tcttctatgg ggtccaggtc aggactctgt  
3661 gcggttcggt ccagttcatc cacaccagac tctgtcctcc atgtctgtat ggaccttctg  
3721 ttgatcactg gaacacagtc atgttggaag aggaaggggc cgctccaaac tgttcccacc  
3781 aggttttgag catggaattg tccaaaatgt tttggatttc tgaagcattc agagttcttt  
3841 ttactggaac caaagggccca agtcctgaac aacaagccca caccataatt cctcctccac  
3901 aaaaatgtct tccaaaccca cactcgtcca tcagatttcc agatggaaaa gtgtgatcca  
3961 tctctccaga gaaggcgtct cctctgctgt agagtcagat ggcggcgtgc tttccaccac  
4021 tgcactgagc gctctacact gcagtgatgt gtgtcctgaa tgcagctgtc cagccatgga  
4081 aaccggttcc atgaagctct ctgactttta atctgaaggt cacatgacat ttggagctct  
4141 gtagcaactg actgcagaaa gtcagtgacc actttgtgct tcagcatccg ctgaccctc  
4201 tgcactgagt tacgtggtct accacttggg ggctgagttg ctgttgttcc ctactggact  
4261 ggctcagataa cacaagggtc ctgcataaga agggctcagag tcgcctccac gtcctcagga  
4321 ggctgaggtc ctttgggtgtg tgtaggccac tacaagacct tccattaaac tgtcgttctg  
4381 tcagcaactt tctatgctgt ggtctgctgg tgtggagaaa tgaatgaaag ggacaacaag  
4441 aaactgagca agctgggtgaa gagagctagc tttgtcctgt tgtcacactt atggatactt  
4501 atggaccata agtgtgatac ttatggacca taagtatctc gttcagccaa agactgctgc  
4561 acccccagtg caaaaaagaa cgttaccgga ggttttttgt cccaacagca gtcagacttt  
4621 actacaacac ggtctaggac tgctgaaacc gctgctgtta ttttaattat taacttattt  
4681 atgacgtaga cttttacttc cactttatat tattacaatc ttatacttac tcaatgctac  
4741 tttgtttttt tctaactgct atattttgtt ttttggctgc tgtgacaact gaattttcct  
4801 ccggagatca ataaagtctt gtcttatctt atcttatttt aaactcttcc attttctct  
4861 gacatctggc atctcttgtt ccggctctc ctggttgctg ggcctggatc gcccatgttg  
4921 ggtgcaactg acctgggtgt tgggggtctc tggggcgga ggtgcttgtg ttgtgcttgt  
4981 gctgcataga tgctgacacc ccggccaaca ggaggacagg gcgaactgcg ccttctgggt  
5041 tctcttttct ttagctctgt catttccctt tgatttctgc ttgttttctg tatttcatat  
5101 taaggggctt atttaattat tttattacat gtgtaggtat tggttttatt gtattcttgt  
5161 ttgtttttca ttgaaagcag cttgagctgt ctgtttgaca tgaaggtgc tctataaata  
5221 aaatcaattt gaatttgata gtccacagtc aactgtcagc tgtattttag agcgaagcag  
5281 caggtggtgt cctctgacag ttttacgctg gaattcactg aactcctgag agtgacccat  
5341 tcttttacac atgtttgtaa aaacagctct catgtctgag tgatgatttt agacacctgt  
5401 ggccagacca ggggcctcat ttctaaaggt tgtgtacgca caaaagaagg cgtacgccac  
5461 tctctacacc ataattgaga tttataaaaa gcaacttga cgggaaaaatg tgcggtcctt  
5521 cacgctctga cccaggcgtc cgcacaaaaa cgggtgaaat gagaaaaggc gacgcctcgc  
5581 gcagatggaa gaaacacgtg aaagtgaaaa tgacaatact gcctctcata aataacatga  
5641 agacttcaca aagcaagtct tacaattaac agctacacca acacccttt gatcgatcag  
5701 cagtgaacaa aacaaaaaag atcaaacgaa aattacaaca gaaattcaaa tgaacacata  
5761 tttgcaaaaa gaaaagttaa atatgttctg caatattggc atgttctgca attcactctc  
5821 atagataaca tagttaacag aacgaaataa tgtacaaaac tgatattcct gtcagtgcat  
5881 ccgtctggag gagcagatat tggtagacag agacagacag acatattaat tgtccactgg  
5941 ggaaagtgtt tttcattttc attttcttca taagctatgg aattatggta ttcatgcata  
6001 tgcttttagt ttagtttatt tctgataaaa caatgtatgg cgtatgtctc aaccattcag  
6061 aaagcaacaa gaaattacat ttgctgctgaa caatttccca tttccacgtg gattattacc  
6121 gacatctgta gcttctcaga tgtaactaaa tggatggaaa taaaatgccc catcacaatg  
6181 cgtaatgacg cacaatggct gatcttgcgc tcttaaaaaga tgcggcaaat ggaagaattc  
6241 ggagtgaacg tatctttaga cagcaaggag acttgcctgc aaacgaggac gagtggctta  
6301 tgagccggtt ccgacttctc ccagccgtcc tggttggagct tttggggggg tgtcaccggg  
6361 tgcacttctg gcgtcgtgtt cccccctgc cctaagtcac cactccactt aaaagggtt  
6421 ccccaattat tgcgcccagt cccccctcc cccccctgc cccccctgc cggacacact  
6481 ctggcgtatg agctccagac gtttttttgc cttgactttg atgtccgacc atttctttt  
6541 tatttctggc acgggtccgag gttgtgagge tacagcattt acggcgtctg ccaccgtctg  
6601 ccgctcacgt gcctttttgg cattagtaat gccacactg tgccctcaa acaacatttt  
6661 ctctctttt ccacctcgc aacgataact tctacttca attgagtga gttacgtttt  
6721 tttgatttcc tctctgggtt tgccatggtt ccgcaatcaa tgaatattca tttgtggcg  
6781 tttcacggac tatttatgg caactatgg cgtgtcatga ggcgcaaaa gctgcctgc  
6841 atttagaatt ggttgtgatt tattaaggga aagatgcgta gggtttgcgt gtgcaggtt  
6901 taataaatcg gaatatgtct gtgcgtacgc acatcctatg tttcatccgt acgccactt  
6961 tgacgcaaat cctacgcaaa gttttataaa tgaggcccca gggcttggga ccgtcacaga  
7021 agtagagaag ggaacaggca aacagcaaac cagcagagc taaaccggt ccctcactgn  
7081 nnnnnnnnt ggaagctatt cctttgggt agtattcaag tatattttta atttgccctt  
7141 tgatttattt atttattttt aaaggatttt accccaggga tgcaaaaaa aaaacagaat  
7201 tcaataagca attaaatgtt ttaatttaat tatttataaa tgcaataatg aaagaacgaa  
7261 atcagtcaac atttttttt taattttag ataatattt caggttaaac tgtaacaagt  
7321 caagactttg agaaagagaa taaagaagaa gtgcacagaa agcagatttc catcagcatg  
7381 tctgagttca ggactgggag cactggtctc tctgagagt ctctgagact ggagtctggg  
7441 atcctctctt ggcctcacag gtcaccttct cccactggtc tgcagagagc ctcagggtgc

7501 tgctccagct gtagaggcgg tccttctgca gcaccccggg gtcctctgctc tcctccctgc  
7561 tgctgctgcc gaccaccttc caggacagag tccagctctga ggggaagccc ttgttggcca  
7621 cacacatgag tgtggcctcc cctgctgca gtcctcctcg ggagggggcc agcactgtca  
7681 gggagggcgg ggcacaccc agggagacc aatcagctta gaggacgga agcacagc  
7741 tgtcaataca aaagctctga ttggatggag tgctttcagt tgcagnnnn nnnntgtca  
7801 gattttgtta ccttaaatac agtttagatt tagatattga aaatcagagt ttctctgaat  
7861 aaaattacag agaaatgtca tagcaacatt tgaataaaaa ataactatgg taccaatatt  
7921 tgccgTTTTT acactatatt ttatgctgtt taatTTTcct tcattatcct tattttcagc  
7981 atctacacaa aatctgaaaa tctctggTcc tgaagagcta ctgcttttga tttcttttag  
8041 cttttctgcc ttaacaacca agtttctagg ttcagggtgtg tttggcaagt aagatcctaa  
8101 aggatactaa ttaaggaaa agtttaatcg tgaaattaaa atgagtgaaa actttcagcg  
8161 ccaactgactg aacacatcta atccttTgat ggacagaagc attataaacc aagttaaagt  
8221 tcagaaccaa cctacttat cttaatgctg cagccattaa aatctacata atgtgcacgt  
8281 tgcctctgtt tacaccaggt actgtacaca tctgctgaac attaccaat aagcacatca  
8341 accacaactt ttacatatac atacaaataa aatgaagtaa atcgttgcaa aaattgaaca  
8401 ggatatttct attaaatgca cctttcagat taggctttgg agcagtgaca tttgaaggcg  
8461 tctcatcatt catgaagggt cctcttgatc tctttggTga tggagatgg agctcattc  
8521 tgtcacttga tgaactgag cctctgtag tgggttctgt ggaaaacaa acttttagaa  
8581 acattttttg ctttttattt ttcattgttt atctttattt tttacaattg caaaatatta  
8641 aagtgcacat aaaattcctt attgtcctca ctTgctaatt agttttttaa tgctaagcat  
8701 ttggacttta atatacgcta ctgtaacaag agcaaatat tgaaggagaa tgaatacaat  
8761 taacagcaaa caagtcattt ttcctcattt atgcatccat ctTcctcagt gatgggaact  
8821 tgatctgtag agatatacaa aagaataggt tagtcaagcg tccaaaacta gcggttaaac  
8881 gtttgagtaa aatttgaaca aacgatctgg ttaaattcca gtctcatcca acttttttcc  
8941 gtgaaactca gccagTcttc ctTgctctg agccatcaag actttgctga ctttaaatag  
9001 ttgcaaggTc ttttcgggta gtgtgtagaa gTcatcagac atataactgg gtgggtagtt  
9061 attcctggat gttgtacagt cacaagTtga gttgcagatt tgttcacttg agggatttat  
9121 gacatttggc aaatcatcaa gcctaggaag tcttccctg gcaggTgtc tgtacctgcc  
9181 atcactgtca gtatcacttt ctgatgtggT atctggaatt taacaatctg aactttctga  
9241 agtggagaca aaaagatgat cagcatcctc cagattcagg tctttaagTc ttaacaaaa  
9301 agaaaaaaaa taaagatcaa gagtgacgt gtgttctgca acagctgac taaaagttaa  
9361 tagatacaaa taatggTatt ccactttatg caatatgtga gggtaaagt ttaaaatgt  
9421 ataactaaag taaaatagaa ataaatgtct agcaatgtga aattaaacat ttgatacata  
9481 gttttaagcc aaaagaaaat ggtcactttt agttcttaat cgagggacaa caacctcttc  
9541 atcatcaggg tgtatcaciaa gctgctgagc acatgcataa tgattgcaaa agttaaaaa  
9601 aattacagta ctagaaaaat aggaaaattgt ctgtgaaagg actttttttt tataaattgg  
9661 acacaaatga aaagttggct aagctagttt acaagaatag catacataa tgcataaag  
9721 atgtaggata aacttggata cagacacacc agtcaattta cattagaaa aaaataaact  
9781 tttacctcag atggcgatgc aatgcttggT cctctggctt catctgtccg agtctctggc  
9841 aatgttgaag aatggccttc cactgcattc atgtaaacac tgttggTgac tgtaagacat  
9901 ttttaaaatt aagaaagaaa ttaaaacacg aactatttac aaaaatgctt gataacaaat  
9961 acaacaggTt ttcaagctca actgcttctt gaaaaaaaat gtatgaaata agaattaggt  
10021 gcttcttgat ataataaaaa tataaattat tttggTTTTg gataattgag aaaatgtgca  
10081 cgTTTTgtat taagacaatg ttttacagac aggaatacaa gccattatg gggaccagct  
10141 ttatccaaca ccttctcca tagcatttcc tcaataagta aagtaaaaag ttgacaaaaca  
10201 ctaattcaca caaatgggat tataaggatt attaatgctt tgactatatt tcagtcagac  
10261 aactcttTga gtaagaaata tttattTgac atacttaatt tTcacattct ttaagttggc  
10321 attcacatct ttttcgTTTg gcataaggct cggttcaatt ccatgagaaa tttccataaa  
10381 actttcgggt aacaaaacc ccttttacgg agcccacagg tggagccgg ggaggaggga  
10441 ggggcgaaga cggagcgtg aaggtaagaa agaatgaaca actgcgaacc tgagcttaa  
10501 taggacgctg agcaggtgag ttaattgact gaaccaccct agggtagtaa cctgtaaaca  
10561 ctgccgagta cctgcctgaa aatacaaciaa gTcatcatta caagaagtgt gtgtgaaactg  
10621 ggggctgcag taccattgga aagacactag aggcaccagt gagccaaact cacactctta  
10681 cacagatgaa aaaacatgca ttctacatgt gtctaagcta aaaaaatgca caggaacgtt  
10741 aaaaaagaat tttaaagcca gtttgaattg ttttcttgat ggggaccagg atttggTccc  
10801 ccttccaaaa ttggTccca ttcctgTact gtgtaaatag attgtttcac ccacaatggc  
10861 ataaatacca acacacacia acaaacatga ccatgtttt tttccaccag ttttTgtat  
10921 tctgtagttc cttagttctg tcaaagggtg gaggatgctg ctcaagtgtt actgcagcaa  
10981 caaaacctgg tcattgctga ttgacaactg tctgacgag tcaaagtgag agctgttttc  
11041 ctgaaaacc tcatttagca tcaccttaa aaggaactaa aagaactgaa ctttatattt  
11101 atataattat tcaggatgaa ggggttgaac tttttctgt gtttgggtt attcctcaca  
11161 aaatgtcatg caacagtaag acaataattt gattttgtca taaaaacaaa agtcagttga  
11221 caaaagatt tttattTgt gatatttatg ccaagttaa ctgtaaaaa gtgaaaaagt  
11281 ttgagagaga ataaagaagt gcacagaaag cagatttctg tcagtgtgtg agttcaggac  
11341 tgggagcact ggtctctcct gagagtctct gagactggag tctgggatcc tctctggcc  
11401 tcacaggtca ccttctccca ctggTctgca gagagcctca gggTgctgct ccagctgtag  
11461 aggcctcct tctgcagcac cccgggTctc ctgctctcct ccctgctgct gctgccgacc  
11521 accttccagc acagagtcca gtctgagggg aagccctgtg tggccacaca catgagTgtg

11581 gcctccccct gctgcagctc ctccatggag ggggccagca ctgtcagga gggcggggca  
11641 tcacctagga gacaccaatc agcttagagg accggaagca cacagctgtc aatccaaaag  
11701 ctctgattgg atggagtgct ttcagttgta ggaaggtttg tgttcagggt tttttctgct  
11761 ccatcagtc tggattcaca cattgtttca ctcccttgta gaaatctctc atgcagatca  
11821 gcaacaagag aaacttaagt ttctactaaa aaatgtccaa ctgggttaga aaaagagcag  
11881 atgcatctgc atgtagaaac aagtttgac tgaatgcctt taaaatgctt catcatgaaa  
11941 gaaatgtaca aataaggaca aaaacacaac aatcatttca ggtttgtgtc agaaaatcct  
12001 tgaataataa aaataaatgt tctgaaatat caaatgtcca aaaatcaatt ttgtgagtaa  
12061 aatctgcctt ttaatgcaact gtgacaacat taacataaca ttattcctaa aaaaaaaaaa  
12121 aataacaaaa cacattgtta ataggatatt gtgtaatcaa aataatattt ttaagtttaa  
12181 atatttggca taaaaagac tttggattta ctcaataaaa actaaaaact aacctgaatt  
12241 tttcttcagg taatttaaaa aaaacatttc actctgggtc ctccaccaa aattcaccac  
12301 tttgacacaa actgactaat gtgttttaca aaaacctctg actctacaga gactctttcc  
12361 agctgtttta atataaacta gatatttctg atttcttgat tcacatagaa atgatgattt  
12421 attctatatt aaggcaacac aatttagttt tttcaagttt aacgcagact aagctgtctt  
12481 ataaaaatgt attttaccaa aattaattga attttataaa gaatattagt aactcagaat  
12541 caattaaagt aggaaataag acatgaaaa ataaaaatca acaaaaagat ctactactt  
12601 ccaaaactca gtctggttcc tccacaaaa gtccaccaca gtgatacaaa ctgatggaag  
12661 cgtcgtacaa aaacctctga ctgtacaaag acacgctctc tgactctgaa acaaacaaac  
12721 tcaactgatg acagaacatc ttaaaataat ccatctaagt tctagaaatt acattttctt  
12781 atgtagtaag ttgtaattaa actagtaatt gtttattgat attcctaactg cagtaactaa  
12841 tgtcatcatt actcagataa aactaaatga cagcaaaacc accaaaatcc taaaaaaaaa  
12901 gtctaaatat ttcttctaaa aaattagaat tcatgcaaaa atcagttgaa cagtttttaa  
12961 atgtggctgc aggttaaagt gatccaaaac tttactgaag tccatgtttc aaatgttgc  
13021 ctgcaaaaaca tgttttcaat aatagcagca gagtttgact ctaaataaca aataattccc  
13081 atcatgcatt gataaaaaatc cactctttga tcagcagaac ttctgtcttt aatacaataa  
13141 acagctgtca gtcagtttaa gtggaacttc ctttagagag aaatctacct ttgagcattt  
13201 atcattaaat gtttccaaat gtcagtaaaa aagtcaatgt tgtggtttct agtgcctgc  
13261 tgcttctgtc tgctgtcatg tttctctaaa catgaagaga aatgcaataa ataactgtta  
13321 atatgtgttt ccttttagaca ctgtttttat attaagtggg gattttttaa atcactgat  
13381 tggattctaa acctttatat gcctcgagaa aaatggaaa aaaataaaaa tacttcagaa  
13441 actaaaaaac agaaacaatt gtaaaact cagatgtcct cacatccat tgaacagctt  
13501 tatgggtcatg atgtttcaaa aaggctaata gtggatccat tatcatctga aagcaaat  
13561 coatgctaca gatgtatttg ttcataaatt attacttcca attttctgat aatcatgacg  
13621 atgaagatga tccatgttcc tgttggagtg agtggtttcc atagagacac tttgcatcag  
13681 cagctccatg ctccagtgct ctgggagact ttatagtcct gagagttgaa gactggatga  
13741 ctgacagctg tcttctatca cagcagaaga cacagaaatc ctctctctcc tctctctctt  
13801 cctccaaaac atgagtgtga tgtgcatcct catctggact ctctctgct gctgcttac  
13861 aggtaaagtc cagagaatcc aactcctctc ctctatgaac atccgtccct ctgaaatgaa  
13921 ggccacaaaa gcatgaagct actttctgtt tctgtctgtc tctcagagt ccagaggaca  
13981 gttcacagtg actcagcctg gagcagtgag ctctgctgtg ggaggaaatg tctccatctc  
14041 atgtacaacc agtcgggatg tttataggca tattggcaaa caccgtttag cctggtagca  
14101 acagaaaaat ggagaatctc ctaaactact aatttacgat gctagcactc gagcttcagg  
14161 gactccaagt cgttttacag gcagtgctatc aaactctgat ttcaatctga cactcagtg  
14221 aattcaggct gaagatgcag cagtttatta ctgtctgggt tttcacttca tccccagtc  
14281 ggggtgttc acacagtgaa aaacagtcgt acaaaaacct ccctcattct ggctgaacag  
14341 aaactgaact gacagctgca gctggaagat gctgcagaca ctgcaacagt tcaactgaca  
14401 tccattctaa tgcaatagac accatgttga atcaagttta gtataatttg taaattttac  
14461 ttatccagtt cacaataatc agaggaaagt atattgtcgt gctgtggttt cccagtgatg  
14521 gcaattgctc aactcttcag gacgtgctgt gggagggaaa tcaactgaca cgacaagaac  
14581 tctttgctcg taaactttta ctctcttga gcaggtaagt atagataatg ccttctaaca  
14641 gcaacaggct tgcaatattt gctcaggctc ttgctcgggc acagaacagc agagagacct  
14701 gtccatgcga tgagcgtgag cacctactga aatctcttca cgttaccac aacttaactc  
14761 gaactccaag tatcgcttcc cttcttttac caataagaat acgctgacag ggggttatcc  
14821 tatgttgaag taactgcctt aaacaacccc cccttgggag tactgagtc cttcagtaact  
14881 aatgcctaaa aataataaaa taatacagaa ctgaattacc actggctgta tgaatctgg  
14941 aaatactgaa cacatctctg aattgaacac gttactgaac acaactttta cttttaagat  
15001 taagcaagcc taagactaga gtggttctctg aacatctata acttctatcc ttttaactatt  
15061 ctctaaatct ttctggacga ttcactatac gcccttggg ggttttttaa aatcctctct  
15121 tgggtcttct gttccccacg cagagctctt ttcttctctt tatccaccat gctttgtggg  
15181 ttccctttta cttgatctct ttcattattg ccatttagaa aatgctctgg taccagtggt  
15241 ttctcttact tatttgtact cctgtatctg tttcacactg caggacttga ctccgtctac  
15301 gcttaaccga ggctggaatg atgacacat tgtatggttt cagacaatca tgaatgatta  
15361 tcttgtctgc tttcagcccc tgaatctcat aaagaacagc accacgacat gcagatacaa  
15421 tcaattggtcc cttccatggg gcttgaagct tttggctcag accttcttt ttggatcat  
15481 cttttacata aacctggctc ccaacttggg atgtgttctc tcttgcctga acatcatgca  
15541 gcttcttctg acgtttctgt gccatccgga gatgttttct tgcaaggtta tgggcatttt  
15601 taattccttc atccagggtga tgaaggaact ccagtgtttc catcaggtca gatttgactg

15661 cagcgatgcc agtttgact tcttgaggct gacttctctg ccaagtacaa gtctataaga  
15721 tgtaaaccga gtggcagcat gttaagagct gcgataggcc gaagtaagca gcggtaatgt  
15781 cttatcccag ctcttctggg tctgggtccac ataaccctt atcatctgga gcaagtgttg  
15841 attgaacctt tctactaggc cattggatgc gggatggtaa ggagatgtcc tcatctggg  
15901 aatttgacaga agtttgcaaa cattctggaa cagcaaaact tcaaagttcc ggccttgatc  
15961 tgtatgtaat tcaagaggtg ccccaaaaaca agcaatgaag tcatcacacca gtttctttgc  
16021 tgtagtttct gcacctggta taggaaataa tgggtcaaaat gtacttgttt ccagagctat  
16081 aggctcgaaa tgggccaaga atgtctagat gcagccgatc gagtgggct cctgcttgat  
16141 aattttgcag tctggccttt attgtggaat gtgctgactt gcatgcattg caatactgac  
16201 atttcttcac aaataggtgg acatctcccc ccattccata ccagtgatag ctctggcgca  
16261 cacgttccag ggtttttgccc tcaccctaagt gaccagaatt atggcaacct tgcaaaatgt  
16321 ctctctgcat gaaagctggg agaagtatta gaaaggttga cttcccggtt cctggtttta  
16381 ccccaaacat agttcaggac acctttgtac aacagaactt ggggccaacg gagccaaaac  
16441 ttcctcacag caggactttc catcatccct tctccttag taggtagtgt ctctgactct  
16501 ttccacttat ggagaaggga gttgttcagg tgtgactgat tgtaaccagt tagctgctgg  
16561 agcttcaaac tctgtactga cctggatgtg tgcacttggc tgttcacaat tactgccatc  
16621 agacttgaca cacctcaggg agccggttta gctcgtgctg gtttgcggcg gttccgctct  
16681 gtgaaaccag ggttcgaatc caggctgctc cctgttctgct tctctacttc tgtcgaatgt  
16741 ccaagcccga gcccggtgct tttgagaggg ttgctgctagg aagggcatcc ggcgtaaaac  
16801 attgccaagt ataccatgct actcgttcac tgtgtcaacc cctgatggga aaagccaaaa  
16861 gagaaacaac agagttgaaa cacctcactg ctaaaggtac aatgtcatcg acatcatctt  
16921 taaacctttc ccaactgttc tgcagtcgaa actacagtgt gtagegcaaca atagcaagca  
16981 gctgtcttct ggtgagacag tatctctgtt gtactgttgt gagatggttg ctggcatatg  
17041 tcaagactca ctcttcttcc cactggagtt tagatagtac agctccaatg ctgtgaaatg  
17101 atgcatctgt atcaagaata aacttgccct cagaaaatggg gtaacaaaag actggtgacg  
17161 tggtcagctt cacttttaac tgtgcaaatg catcttgggt ctcttcagtc caaagaaatg  
17221 gaaccctttt ttttaagagg agtgaagggg actgggtaac tctgcaaaaag ctggaacaaa  
17281 ctttccgataa tggttacaca acccaagaaa agcttgtaga acctgttggg tctggggtgg  
17341 ctcccagagc tgcacatcac taaccagtgc tggggttggc tgaattcttt gaccattcac  
17401 aatgtggccc atgaaaagca cctcatcctg aagtaaatgg cacttagatg gtttatactt  
17461 gagccctatg gtgtgtaaac atttacaaac ttgtgccatc ctgtccagac tttcatatac  
17521 ccccaaccga gaacaataat atcgtctagg tagatcagca atgtttccca ctggagtcca  
17581 tggagcacta actccattgc cctctgaaag tgcttggggc attacagagg ccaaatggca  
17641 tgcgtgtata tcatataga ccccatctag tgatgaaatc tgttttctga cgatcttttc  
17701 cattcatagc tatctgccag tatccggact gaagatcaag ccttgaaaaac acagtggctc  
17761 ctccaagcac atccagacac tcttcaatct aaaggatagc cgtcttttggg ggtcattgtg  
17821 agatgggtgat aatctacaca ccaccgaaat ccatcttttt tccgtaccag cactacaggg  
17881 gaagcccatt cagatgaaga tgggtgttatg actccagctt ttggcatagc ttgaaggtgt  
17941 gcctcctctt caccttgaaa tccaagaggt gagagcctta ctgggtgacg aacaggcttg  
18001 gcagatcttg tatcaatcct gtgtgtaaca gcagacagat aaccacaagc cgagtcattc  
18061 ttggcaaacg gagataaata tgtcagcagt agctggatga aatgttgttg ttgttcctca  
18121 ctttaagttt cattgacagc tgggtgcaagg ccatgaagat gctctgggaa gtctgaagat  
18181 gtgactactc tcccataac aactgacgag ctattccttt ccatgtttag gtcaggttct  
18241 acttgatgct ctccgtcaca ttctagctat gtatcatcag cttcaaccag cagtccaaga  
18301 caagctcctt ttggtagtgc tgattttcta gttgaaaagt tgcagagcct gactggcact  
18361 ctctttttca tagttgtaaa tacaccctct gaagctatag cttcagtgat gctcattggg  
18421 tocaatcagc ctgggtattc aggtcttggg tctgcaactt caccccaac tacacattca  
18481 gatgatgggt gtatggctgt agtctgactc agcatcacc tggtaacata atagtctgtt  
18541 ccactctcct cactattttg gagagcaca gctcattatc aataaagact ttgccattgt  
18601 catgactggc aacatcatga cacttcatta gatccagtct cagaagaaca gactcccgtta  
18661 tcggggccac gtgcacatcc cagtcaatgg acttggatgc aatttataag ttaacattta  
18721 aaccaagctt tgaccacgct gtgcctctgg ccaaaaagggt gcgctagtga atgctgtgct  
18781 gacaggactc caaagtcagt ttaggtaaac atttggaaca cttttctctt tcttgtgaag  
18841 ttggaccagt cggttttact ttcttgggtg aggtgtattt tactcacaat ttttgaagc  
18901 ttgaagatcc cacttctgac actatttgtc gtgctgtggg ttcccgggtg tggcaattgc  
18961 gcaactcttc aggacgtgct tggggagggg aatcactgca cagcaaga actccttgct  
19021 cgtaaacctt tactcgtctt gagcaggtaa gtacagataa tgccttctaa cagcaacagc  
19081 cttgcaatat ttgctcagcc tcttgctcgg gcacagaaca gcagagagat ctgtccatgt  
19141 gatgaccgtg agcacctact gaaatctctt cactgttacc acaacttaat ctgaactcca  
19201 agtatcgcgt tacttcttta accaataaga ataggctcaa aaaggggggt attctatgtt  
19261 gaagtaaatg ccttacaata tcatgaatca atcctatctt tatcaaggac actggatca  
19321 gatctgtttg ttcattgact ctctctgttt atcttctca cctgtagcct cagggtggagc  
19381 tttttgtag tttttggaga ctttgagag taggaggaaa agtatttcta aaaacagtaa  
19441 aaaaaaaaaa aaaattctat agtttgaata aaacaccttt ttttgataaa ggagaagtca  
19501 acaagttttt aatgtaagtt gacccccac cccccagggt ctgctgtggg cacaacacac  
19561 cttatgttac cagatcaaat gttttgctgt cgtttttctt tagtaaatgc atgtttctgt  
19621 aattaatgta ttcattcaca atatgtatac atatacatct gatcattgtg actaagttag  
19681 acaaaaaaac aacactgaaa taaactctaa taacagattt atattgtcag gatgccagag

19741 aaaaggcctt taatgtagtc caggtagaaa aaagtgaatt gttattccct aaaaagtctc  
19801 attccattca atctgcagca caaacccata gaaaatcatt ttggtttttg aaagataaaa  
19861 aatcaaaca cttactgcaa gattatgtca attcctgaaa atatttcttc ttttttatac  
19921 aaatgatca gatattttgc ttcataatcat attttttbtg taggtcgttg taggtgggaa  
19981 aatcaaatag ttcagtgtag atgggagcag tattttccaa taacactgaa atacattcag  
20041 tttgggtggct gagtggactg tgctgctcag atttgactga agatcagggc tgagaattgt  
20101 tgatgctgtc agagtaagac aggctgtttt cctgagaaac ttctctccaa aagaaggatt  
20161 tgttggctct aataaactgt cataaaagac tttgtagttc ttctgtgtgt gttcatgtgt  
20221 gttcattcat ggacaagtgt gtccaacttt ttgacageta tttattgttt actgtcagtg  
20281 caaaaactct gaactcctcc tgagtttaaa gaccagcttc ttctttacat ttgatgtaat  
20341 ttattccttt ttaacaaact atttgacca ttgtccattt gtccctctga aatgaaggcc  
20401 acaaaagcat gaagctgttt ctgtttctgt ctgtctcctc agagtccaga ggacaggtca  
20461 cagtgactca gcttgagca gtgagctctg ctgtgggagg aaatgtctcc atctcatgta  
20521 taaccagtca ggatgtttat gtttataaaa gcaatcactg tttagcctgg taccaacaga  
20581 aagatggaga atctcctaaa ctactcattt actatgctag cactcagctc tcagggattc  
20641 caagtcgttt tacaggcagt ggatcaaagt ctgatttcac tctgaccatc agtggaaatc  
20701 aggctgaaga tgcagcagtt tattactgtc agagttatca tgaatcaac agtcagtggtg  
20761 tgttcacaca gtgaaaaaca gtcgtaaaa aacctccctc attctggctg aacagaaact  
20821 gaactgattg ctgcagctgg aagatgctgc agacactgaa acacttcaact gaacatccat  
20881 gctaacaat aatagtaata aactttattg ttattgcacc tatcaagata aaaatcacia  
20941 agtacttcac gttaaaacac ggtaaaacac agaagataaa aaaaataat aagaaaaagc  
21001 tattttaaaa agataggttt ttagctgctt ttttaaagta aacagagtct gcagatctga  
21061 ggctgagatt aagggagtcc cagagggatg gagccactgc tgcaaagact ctgccacctt  
21121 tagtttttaa ccaggttctc ttaaccacca gcagaccctg cgggtcccctg acctcagggc  
21181 cctgctgggg gtgtacggct ggaaaaggtc ttctagtaga ccgggtcttg gttattaaga  
21241 gctttgtctg ttaaaactag gattttaaat tgcactctgt agcggatggg gagccagtgc  
21301 agctggatta acaacggggg gacgtgtgaa aacttggatg atttagtaa aagccttgca  
21361 gcagcattct ggacaacctg gagcttttcc agagattttt tgctcaaaaca tgtgaagatg  
21421 gagttgcagt aatcaagatg atacgatgac acaatgggtca acagtgacaa aagctgcagt  
21481 caagtccagt aacagtatga cagagcattt tcctgcatct tgctgcatc ggatgcatg  
21541 agtgactctg agaagggctg tttcagtgga gggagctctg ccaaaacctg actgaaactg  
21601 atcaaaccat aactttttgt aaaattttgg acatgaatcg gagattagaa ataggtctgt  
21661 aactgctcaa gagggaggag tcaagcccag gttttttaag gagaggaagg acagcaggtt  
21721 tottgaaagg ctcagggact tcagagctcg tcacgggtgc tggcagctct cctcccctca  
21781 gctcagctct gctcatcctg attgccacca gctgccttca ctcatctcat ctcttatgct  
21841 gactcaagga gacccaacgc cactgttcaa gcgccagttg ttgccccta tggtgactac  
21901 cctggttcca agttatgctc tgttggttctg accttagctt tgttctctta gtaacttat  
21961 gctccttctc tcaggataac caacctctca cgagtgcag cagcctggac ctaacattca  
22021 actgctctgg aaacctgaag acctcggcac ccgctaaccg catcaagccc tccagccacg  
22081 ccacagccac gttccagccc ggacctctt cagcttctac cacattcacc tcaggagaaa  
22141 taataaatct tttctcacca aatcactcac ctgtcttcc tctgggttac agcatctggg  
22201 ttctcctcc cttgagatc atgacagagt cgtcattaat gtgcatgta aaatcaccaa  
22261 ccttcattag ggaggataaa aagtggctga actcatttaa aaagaggctg tttgggtccag  
22321 gtggacagta gacaacagca cagaggttct ttgtccacga ctttgatac cttcatgtcg  
22381 aacgaagaaa agtgaacgac gctcacagag cgtcagagga gacgactcct gaagaccgcg  
22441 gtgactcccc cacctctcat tccacctgtg tggaaattag atttagtata atttgtaaat  
22501 tetaatgatc cagtttaaaa aaatcacatt aaactatct ataaataat cttttatcc  
22561 tcttttctc aatgagactg gtatcagatc tgttggttca tgactcctc cttgctatct  
22621 tgcccacttg cagcctcagg tggagctctt cagtttttgg agacttgata tatgaacaat  
22681 gtaacaact atttgaccca ttcattgcaga aaatggtaa tgaacaatgt ccatgtgatc  
22741 caggactcct cctactttct gtcaccttga aagggaaaaa cactgacaga gttcatgttg  
22801 ttgttctctg ttttatgtta ttctcagaa aaagtgatat cagagaaaaa tgtaagaaat  
22861 ttctttgaca taaaaacaga ctcatggaaa tcagttggta aatgtcattt ttattagcag  
22921 atttttcttc aaagtaaaac ttttaacaaga gaaagagaat agaagaagtg cacagaaaagc  
22981 agatttctgt cagtgtgtga gttcaggact gggagcactg atctctcctg agagtctctg  
23041 agactggagt ctgggatcct ctcttggcct cacaggtcac ctctcccac tggctgcag  
23101 agagcctcag ggtgctgctc cagctgtaga ggcctcctt ggcagcacc ccggggctcc  
23161 tgctctcctc cctgctgctg ctgctgctgc tgctgcccac caccttccag gacagagtcc  
23221 agtctgaggg gaagcccttg ttggccacac acatgagtgt ggcctcccc tgctgcagct  
23281 cctccatgga gggggccagc actgtcaggg aggggggac atgaccact gcagagaaac  
23341 agaggaaca ttttagagct gacatgaaac tgctgagtgt ttcacttccc tctctgagct  
23401 cagtaacat ggtaacagac aggcactcact gatggagcac acaaacagaa gtttctctgc  
23461 taacgatcaa accnnnnnnn nnnnnnnnnn nnnagtaagt taacacaaa agtagacaaa  
23521 tgcagctttt aggaataagt caaatatatt gacatatttg atacaaaact taaagagaaa  
23581 taaatacatt tcagatgtta aagcccataa atgttaaaga ataaaaagca tcagatattt  
23641 ttctaataat tgttttattc agtaaatgat aacgatgctt cacatttctt taaggatgta  
23701 tttccttat aacctgaaag ctttttccc ccactctat tataaatgtg atatttttt  
23761 ataaaaataa aaatactaca tttttagttt ttttacagtg aatacaaaa aactgacatg



23821 attcagcatt ttgactgtaa tgcattttca tgtttcaaag attttgactt ttgaatctaa  
23881 gattcacaac aaatgatgta aaacaagatc atcaaaaatg taacagaagt ttgattcttg  
23941 caaatgttca gtttgatgca gattgaaaga aacttgaaag tacctttaat gtctaacttt  
24001 acaattttta ttttgtttg catctataat ctgaaatgac aagttgatat tttttacttt  
24061 tctttttaag tatttaagag aattcatgtt cctggttgaa tcagtggttt ccatagagac  
24121 actttgcatc agcagctcca tgctccagtg ctctgggaga ctttatagtc ctgagagttg  
24181 aagactggat gactgacagc tgccttcat cacagcagaa gacacagaaa tctctctct  
24241 cctcctcctc atcttctctc aaaacatgag tgtgatgtgc gtcctcatct ggactctcct  
24301 ctgctgctgc ttcacaggta aagtccagag aatccaactc ctctcctcta tgaacatccg  
24361 tcctctgtaa atgaaggcca caaaagcatg aagctgcttt ctgtttctgt ctctgtctcc  
24421 tcagagtcca gaggacaggt cacagtgact cagcctggag cagtgagctc tgctgtggga  
24481 gaatctgtct ccatctcatg taggaccagt cgggatgttt atgatgannn nnnnnnnnnn  
24541 nnnnnnnnnn nnnnnnnnnn nnnnnnnnnn nnnnnnnnnn nnnnnnnnnn nnnnnnnnnn  
24601 nnnnnnnnnn nnnnnnnnnn nnnnnnnnnn nnnnnnnnnn nnnnnnnnnn nnnnnnnnnn  
24661 nnnnnnnnnn nnnnnnnnnn nnnnnnnnnn nnnnnnnnnn nnnnnnnnnn nnnnnnnnnn  
24721 nnnnnnnnnn nnnnnnnnnn nnnnnnnnnn nnnnnnnnnn nnnnnnnnnn nnnnnnnnnn  
24781 nnnnnnnnnn nnnnnnnnnn nnnnnnnnnn ntcactacat cctctctttt tacttcaaaa  
24841 aagagccgtc agaattgtac ataaagcgg atactctgat catacaaaa atctagactt  
24901 ttaaaactac atgaccttgt ggattttttc cactgcgcaa cttttataca gagccagtgg  
24961 gaaatcgtaa ccattcaata tccaaaaaca gttcttagaa aatgaaggag gctacagact  
25021 gaggggatgt aggaacttca agatcaaact gataagaacc acaaagaaaa gtttctgtgt  
25081 gtcggtgtgt ggcactaaac tttggaacgg tttaaagtaat gagctcaaaa aatgttcaaa  
25141 tattcaagaa aatgtataaa gaaactctga tttcaggata tgaagataag aggatttaag  
25201 gatcaacagg tgtttgaata attccaaatc catgtgtgaa cttgactgtg gtgaaataat  
25261 caaagctctt ttaattacaa ccaatgagtg ttacattcta atgtgcaata atgattactg  
25321 aaatgtttta attacaatca atcagctatt gattttgttt acttgacctg caatgtgtag  
25381 taatgattac aggtttaatg tgatcatgtg ttctaagat aatcaatgat tattacatat  
25441 cggtagcgtt actgtttact gaaatcatga atgaatgttt tctgaagatc atcaatcatt  
25501 tctaggaact ggattttgtt acttgaagag aatctatctg atcagaaccg gatttgaaaa  
25561 actgcaagtg aggtttttgt tttgtttctc gtctttttaa tctatgcat taatcatttc  
25621 tghtaatgagt ttgataaata tgtgtaaat ttttattgct ttgactaaa tgcttgaat  
25681 aaatcaataa aatcaaaaact caaataatgc acttttctt aaatgaatcc tcaaagtgtc  
25741 acaagataag agtaaaaactc aatataat tctgtaatta attagtttat cacaaatatg  
25801 tatccatata catctgatca ttgtgactaa gtaacacaaa agaacaacac tgaataaac  
25861 tctgataaca gatttatttt gtcaggatgg cagagaaaag tcttttaatg tagtccaggt  
25921 agaaaaaagt gaattgttat tccctaaaaa gtttcattcc attcaatctg cagcacaac  
25981 ccatgtgaaa tcattttggg ttttgaaga taaaatataa tcaacaacac tactgtgaag  
26041 ttattgcaat tcacgaagat cgttcttctt tttttataca aatgtatcag atattttctt  
26101 catatcattt tttgtgtagg tctgtgtttt ggggaaaatc aaatacctca gtgtagatgg  
26161 gagcagatatt ttccaataag actgaaatac attcagtttg gtggctgagt ggactgtgct  
26221 gctcagattt gactgaagat cagtgtctgag aattgttgat gctgtcagag tgagacagac  
26281 tgttttctct agaaaactct ctccaaaaga aggatttgtt ggtcctaata aactgtcata  
26341 gaagactttg tagttcttct gtgtgtgttc ttgtgtgttc attcatggac aagtgtgtcc  
26401 aactttttga cagctattta ttgtttactg tcaagtcaaa aactctgac tctctgag  
26461 tttaaagacc agcttcttct ttacatttga tgcatttgt tctttgtaac aaactatttg  
26521 agccattcat gctgaaaatg gttaatgaac aatgtccatg tgatccagga ctctctctac  
26581 tttctgtcac cttgaaagga aaaaacactg acagagttca tgttgtgtt gctgtttta  
26641 tgttattcct cagaaaaagt gatatcagag aaaaatgtaa gaattttcat ttgacataaa  
26701 aacagactca tggaaatcag ttggcaaatg tcatttttat tagcagattt ttcttcaaag  
26761 ttaaactgta acaatagaaa gagaataaag aagaagtgca cagaaagcag atttctgtca  
26821 gcatgtctga gttcaggact gggagcactg gtctctctg agagtctctg agactggagt  
26881 ctgggatcct ctcttggcct cacaggtcac ctctctccac tggctctgag agagcctcag  
26941 ggtgctgctc cagctgtaga ggcctgctt ctgcagcacc cggggctcc tgctctctc  
27001 cctgctgctg ctgctgctgc tgcctgctcc gaccacctc caggacagag tccagctga  
27061 ggggaagccc ttgttgccca cacacatgag tgtggcctcc cctgctgca gctcctcat  
27121 ggagggggcc agcactgtca gggagggggg cacatgacct actgcagaa aacagaggaa  
27181 acatttttaga gctgacatga aactgctgag tgtttcactt cctctctga gctcagtaac  
27241 catggtaaca gacaggtcat actgatggag cacacaaaacn nnnnnnnna tgttcaaaaa  
27301 tcaattttgt gggtaaaaatt tgccttttaa tgcccaatgg ccccttaac ataactttt  
27361 tcttaaaaaa aaaaaaata acaaaacaca ttgttaatag gatattgtgt aatcaaaaata  
27421 atatttttaa gattaaatat ttggactaaa aaagacttta gatttactca ataaaaactg  
27481 aaactaaacc tgaatttttc ttcaggtaat ttaaaaaaaa acatttctatt ctggttctc  
27541 caccaaaagt tcaccactgt gacacaaaat gactaatgtg ttttcaaaa acctctgact  
27601 gaacagagac tctatccagc tgtattaaaca taaactaaat atttctgatt tcttgattca  
27661 catagaaatg atgatttatt ctatatgaag gcaacacaat ttagtatttt caatattcac  
27721 gcagactaag tctggtcata aaaaatgtat ttgacaaaa ttaatagaat gtcattttat  
27781 aaagaatact agtaactcag gatcaattaa agaaggaaat aagacatgaa aacataaaaa  
27841 tcaacaaaaa gatctactta cttccaaact ccagctctggt tctccacca aaagtccacc

27901 acagtgatcc aaactgatgg aagcgcgcta caaaaacctc tgactgtaca gagacacgct  
27961 ctctgactct gaaacaaaca aactcaactg atgacagAAC atctgaaat aatccatcta  
28021 agttcttagaa attacatttt cttatgcatc aagttgtaat taaactagta attgtttatt  
28081 gatattttta ctccagtaac taatgtaacc attactcaga taaaaacgaa atgacagca  
28141 aaccacccaaa atcctaataaa aagtttaaat atttctccta aaaattttaga attcatgtaa  
28201 aaataagttg aacagttttt aaatgtggct gcagggttaa tggatccaaa actttactga  
28261 agtccatggt tcaaatgttg ctctgcaaaa acattttttc aataatagca gcagtttgac  
28321 tctaaataac aaataattcc catcatgcat tgataaaaaat ccactctttg atcagcagaa  
28381 gttctgtctt taatgcaata aacatctgtc agacagttta agtggactt cctttagaga  
28441 gaaatctacc tttgagcatt tatcattaaa tgtttccaaa tgtctgtaa aaagtcaatg  
28501 ttgtggtttc tagtgtcctg ctgctttctg tctgctgtca tgtttctcta aacatgaaga  
28561 gaaatgaaat aaatagctgt taagatgtgt ttcctttaga cactgtttca tgttgagtag  
28621 tgatttttaaa aatcacttag attcgaattt taaaccttta tatgcctcga gaaaaatgga  
28681 aagaaaataa aaatacttca gaaactaaaa aacagaaaca attgtaaaac actcagatgt  
28741 cctcacatca cattgaacag ctttatggtc atgatgttta aaaaaaggct aatagtgat  
28801 ccataatcat ctgaaagcaa gtttttatgc tacagatgta tttgttcata aattattact  
28861 tccaattttc tgataatcat gatgagaag atgatccatg ttctgttgg agtcagtggt  
28921 tttccatagag acactttgca tcagcagctc catgctccag tgctctggga gactttatag  
28981 tcttgagagt tgaagactgg atgactgaca gctgtccttc atcacagcag aagacacaga  
29041 aatcctcctc ctctcctccc tcttctccta aaacatgagt gtgatgtgtg tctcatctg  
29101 gactctcctc tgctgctgct tcacaggtaa agtccagaga atccaactcc tctcctctat  
29161 gaacatccgt ccctctgaaa tgaaggccac aaaagcatga agctgctttc tgtttctgtc  
29221 tctgtctcct cagagtcacag aggacaggtc acagtgactc agcctggagc agtgagctct  
29281 gctgtgggag gaaatgtctc catctcatgc aggaccagtc gggatgttta tgatgtgaa  
29341 ggcgatcact atttagctg gtaccaacag aaagatggag aatctcctaa actactcatt  
29401 tactgggcta gcactcgaca atcagggatt ccaagtctgt ttacaggcag tggatcaaac  
29461 tctgatttca ctctgaccat cagtgggaatt caggctgaag atgcagcagt ttattactgt  
29521 cagagtgttc atgaaatcaa cagtcaggct gtgttcacac agtgaaaaac agtcgtacaa  
29581 aaacctccct cattctggct gaacagaaac tgaactgact gctgcagctg gaagatgctg  
29641 cacagactga aacagttcac tgaacatcca ttctaacaca atagacaca tgtgaaatca  
29701 gatattagat aatttgtaaa ttttagtgat ccagtttata ataatcagag caaattat  
29761 cataaataac cccccccct cctattttta tcaatgacac tggatcaga tctgtttgtt  
29821 tcaaaataac aataataata ataataataa tacattttat ttatgacacg gcagaacaca  
29881 tgactccttc cttgttgtct tgctcacctg tagcctcagg tggagctcct tgttagtttt  
29941 tggagacttt gagaggtagg aggacaaggt tttttaaaaa cagcaataaa cttctatagt  
30001 ttgaaataaa cacatttttt tgataaagga gaagtctagt ttttttttta tgtgagttga  
30061 tcccccccg cegttgtgac cagggctgct gtggccacaa cacaccttat gttaccagat  
30121 caaatgtcta gctctcgttt gtcttcagta gtctgaaaaa acacgtttaa gatacaaatg  
30181 tatatttctg taattaatgt attcatacaca aatatgtatc catatacatc tgatcattgt  
30241 gactaagtaa cacaaaagaa caacactgaa ataaattctg ataataatatt tattttgtca  
30301 ggatggcaga gaaaaggcct ttaatgtagt ccaggtagaa aaaagtgaat ggttattccc  
30361 tgaaaagtct cattccattc aatctgcagc acaaacccat agaaaatcat tttggttttt  
30421 gaaagatgaa atataatcaa acaacttact gcaaggttat tgcaattcaa gaagatattt  
30481 attctttttt tgtacaaatg tatcagatat tttgttttca tatcatattt tttgatagg  
30541 ttgttttttt gggtaaaaata aaatagctca gggtagatgg gagcagattt ttccaataat  
30601 aataattata ataagcttta ttacagactc aagggtccatt tgtcacaata atacacaaaa  
30661 catataaaag acttaaggat aaaaatagaa cactcaaaaca agtataagaa caatgacata  
30721 aaaagtatta gataaaaaac aatgtcataa aagtataaaa ttcaatgact taggaatata  
30781 aaaacaatga gataagagta tcagaacaat aaaataacca ggtatcatga acttaataaa  
30841 aagactaaaa ctgctgactt aaacaaaaa aatgaaaact taaaagtta aaaaagacga  
30901 ccgtacccaaa acctccaaat aggggattgg tatctaaaag tgctgtgctt tacattgggtg  
30961 agagttaaaa tgatatcatt atttgaagca ttaagacgac agacaaaacc ataaataaaa  
31021 tgtcttaata aagcttggag agtactaact gtatagcacc acaaaacaaa ctgtttgcgc  
31081 tgcaccaccg aggtgtttt gataaaatcc ttagggcatc atcataggca acctgtagct  
31141 tctcatgct ggatgccata aaatttgtcc acaggtgggc agtatacaaa ggtgtacatt  
31201 tcataaggat gaattctttg ttgttgtgag tgaagtgtat ggcaatacac cagtctcac  
31261 aaagtctgat gactttaatc agtgggtcaa gctgtttcct ccacagaata gccacaccoc  
31321 ctggtatcct ccccttagct actgagtgc tgaggctcgt ggtagactct ccagcgcct  
31381 agagttcagg gtgttccatt gttccaggtc ctgttttagaa ataaatgtct cttgaagaca  
31441 caaaatgtca caagtttcca ttagtttgtc tccaactctg cagcgagctt tttccgctgc  
31501 gctctgacca aagcgtaggc cccggcagtt gtatgaagca acacgtattg ccatagcgtg  
31561 ttaaggacct tggacagcaa cattgcccc cgcattaagc gaggtgctca gtccaaccgc  
31621 agcagctttt cgcagctcat aatgcctcct aacgaaggat ccctcaggcc aaagctgcgg  
31681 ggcgtacatt tcgctcact cattaaactc agcagaaaact ataaaagagc tgaatcgaga  
31741 gtttacagta ccaaccttta gacaggtcac ctcacgacct atcttgtcct taagatacaa  
31801 agccagcaca tcggagtcca gagacaggtt aaaccttgtg gcaaaaacac tcaccagctt  
31861 tttccggaca gttatgatgt tacctggggc tccgggtcgc atgacagttg cgtcgttca  
31921 ttcacgttgt cagcgtgtc acattttgag gtcgccggtt cttcttaaca acttgcgac

31981 acttttggtga ggggtgtggca gcacctcctg gacttgctgc tattagctcc agctcggcat  
32041 ccagagtagg caccatcatt ccagctacgc tgttcgcttc cactgtagtg ctccggtg  
32101 ccgtgctcgg aagttctcct ccgctgctc cagagatgac ggaagcaggc cctctccca  
32161 tgtatccacc actgcaagg ccgcaaggcca cggattctcc aaaggtgcyg cactccagcy  
32221 cgttcaccog cogatccacg tcagctgtca cagcgcgaag actgtcactg acgtcagctt  
32281 gcagctgcat ggcttgcttc atcgcgcaaa cctcggcctg ctttctttcc cgtttacca  
32341 gaaggctgga gatatccaga cactggaggt aaatcatcca gatttgtgta cacaaatctg  
32401 ggcattgatg cccacattc attcagcacc ttgaggcagc ttttaataat attggcgtct  
32461 ttctgcaagc ctttatgcga cacacaccgg tgggtgggtg acaaagttca acaaaaagtt  
32521 tctttgaggg ctcgatccat tcagattcaa aaaagttga agccagtggt acaatttctt  
32581 cttgaatcat tgcctcgatt tttatggcca agaagttaag caactcaacc ttcacaactg  
32641 ttttccatc aacagtcttg taaatttcag gtttagttct agaccatttg aaatcgggag  
32701 cagacgcacc acgatacgtg tccccgcca ttgagttttt agactgaaat acattcagtt  
32761 tgggtggctga gtggactgtg ctgctcagac ttgactgaag atcagtgctg agaattgttg  
32821 atgctgtcag agtgagacag gctgttttcc tgtgaaactt ctctccaaaa gaaggatttg  
32881 ttggctcctaa taaactgtca tagaagactt tgtagttctt ctgtgtgtgt tcatgtgtgt  
32941 tcattctagg acaagtgtgt ccaacttttt gacagctatt tattgttaa tegtcatgca  
33001 aaaactctga actcctcctg agtttaaaga ccagcttctt ctttacattt gatgtcattt  
33061 gttcttttta acaactatt gaccattca tegtgaat ggttaatgaa caatgtccat  
33121 gtgatccagg actcctccta ctttctgtca ccttgaaagg aaaaaact gacggagatc  
33181 atgtttttgt tgcctgtttt atgttatcc tcagaaagag tgatatcaga gaaaaagaga  
33241 agaattttct tttgacataa aaacagactc atggaaatca gttggcaat gtcattttta  
33301 tttagcagatt tttcttcaa gttaaacttt aacaagtcaa gaagagctaa aagacaatag  
33361 aagaagtgca cagaaagcag atttctctg gtgtctgagt tcaggactgg gagcattggt  
33421 ctctcctgag agtctctgag actggagtct gggatcctct cttggcctca caggtcactt  
33481 tctcccactg gtctgcaggg agcctcaggg tgcctgctca gctgtagagg ccgtccttct  
33541 gcagcaccoc ggggctcctg ctctcctccc tgcctgctgt gctgctgctg ctgccacca  
33601 ccttccagga cagagtccag tctgagggga agccctgtt ggccacacac atgagtggtg  
33661 cctcccctcgt ctgcagctcc tccatggagg gggccagcac tegtcaaggag gggggcact  
33721 gaccctcctg agagaaacag aggaaacttt ttagagctga gatgaaactg ctgagtttt  
33781 cacttccctc tctgagctca gtaacctgg taacagacag gcatcactg tggagcacac  
33841 aaacagaagt ttctctgcta acgataaaac catccaaaag tctttcttc aattgtgact  
33901 cttgtctgat gtttcaactc ttcttccagg aacatttttc tccatcttct tttcttttg  
33961 atgaaagcat cttcttcccta agtctgcact aacagctgca aagacatctc aatcctaact  
34021 gttttctctg tgttttcagc aggacttgat cagttctggt acaaattcat gctgtgatga  
34081 acaaatgaaa tgaacattca aatgaaactc taatctgttc caactgatcc ctgtcattca  
34141 tcaaagtgca gctttgttca ttttcaatca ttgtcactaa aagctcata gaagatctg  
34201 acagacaaac tgacaacaag gctcagcgtt ggcattgaaat tctgcaaac aaacacaaa  
34261 agttcttctg attcacattt taggacagaa atgatttctc tgagaaatat atggaaagat  
34321 gaggaagtta cagatgttta aactatgaat atattcctgc tgtttctgtg acatttttag  
34381 acaatthaat tcataattta cagacgtcat gactgaaatca cagtttaatg tttacaaca  
34441 gaaacttcaa gttaaagtaa aacatcaata atcacattta aattacattt acagataaag  
34501 atgtccttta taagaactaa agtaattatt aaaactcgtt tgtcttacca aaaaaaatg  
34561 tagttgaata ttattaaaat atgttttaat gttaatcaga ccaaaagttt tagtttttag  
34621 aaagaatcaa aagtacttac agtcaacttc cagttctggt cctccaccaa aagtccacca  
34681 cagtgattca aactgatgga agcgtcgtac aaaaacctct gactgtacaa agacacgctc  
34741 tctgactctg aaacaaactc aactgatgac agaacatcta aaaataatcc atctaagttc  
34801 tagaaattac attttcttaa gttgtaatta aactagtgat tgttttttga tattcttact  
34861 gcagtaacta atgtaattat tactcagata aaaactaaat gacagcaaaa ccaccaaat  
34921 cctaaaaaaa agtttaataa tttctcctaa aaatttagaa ttcattgtaa aataagttga  
34981 acagttttta aatgtggctg caggttaaat tgatccaaaa ctttactgaa gtcagtttt  
35041 caaatgttgc tctgcaaaaa cattttttca ataatagcag cagtttgact ctaaataaca  
35101 aataattccc atcatgcatt gataaaaatc cactctttga tcagcagaag ttctgtcttt  
35161 aatacaataa acagctgtca gtcagtttaa gtggaacttc ctttagagag aatctacct  
35221 ttgagcattt atcattaat gtttccaaat gtctgtaaaa aagtcaatgt tgtggtttct  
35281 agtgcctgct tgcctctgct tgcctgctatg tttctctaaa catgaagaga aatgcaataa  
35341 ataactgtta atactgttt cttttagata ctatttttat atcaagtgtt gatttttaaa  
35401 atcactegga tttgaatttt aaacctttat acgcctaaag aaaaatggaa acaaaaataa  
35461 aaatacttca gaaactaaaa aacagaaaca attgtaaaac actcagatgt cctcacatca  
35521 cattgaacag ctttatggtc atgatgtttc aaaaaggcta atagtggatc cattatcatc  
35581 tgaaagcaaa ttttatgcta cagatgtatt tttcataaaa ttattacttc caattttctg  
35641 ataactcatg tgatgaagat gatccgtgtt cctgttggag tcagtggttt ccatagagac  
35701 actttgcatc agcagctcca tgcctcagtg ctctgggaga ctttatagtc ctgagagttg  
35761 aagactggat gactgacagc tgccttcat cacagcagaa gacacagaaa tctcctcct  
35821 cctcctcatc ttctccaaa acatgagtgat gatgtgcgtc ctcatctgga ctctcctctg  
35881 ctgctgcttc acaggtaaag tccagagaat ccaactcctc tctctatga acatccgtcc  
35941 ctctgaaatg aaggccacaa aagcatgaag ctgctttctg tttctgtctc tgtctcctca  
36001 gagtccagag gacaggtcac agtgactcaa cctggagcag tgagctcagc tgtgggagga

36061 aatgtctcca tctcatgtgc aaccagtcgg ggtgtaata cttataagaa aatcaatcac  
36121 ctttttagcct ggtaccaaca gaaagatgga gaatctccta aactactcat ttactatgct  
36181 agcactcgag aatctgggat tccaagtcgt tttacaggca gtggatcaaa ctctgatttc  
36241 actctgacca tcagtgaaat tcaggctgaa gatgcagcag tttattacta tcagagtttt  
36301 cacttcatca acagtcagtg ggtgttcaca cagtgaaaaa cagtcgtaca aaaacctccc  
36361 tcattatggc tgaacagaaa ctgaactgac tgctgcagct ggaagatgct gcagacactg  
36421 aacagttca ctgaacatcc attctaacac aatagacacc atgttgaatc agatttagta  
36481 taatttgtaa attttagtga tccagtttat aatattcaga acatattata ttatatatat  
36541 annnnnnnnn ncctgttgga agaccatgac ctgcgactga gaccaagctt tctgacacta  
36601 ggcagcacat ttctaccag aatgccttga taatcttgag atttcatttt accttgaca  
36661 acttcaagac gccctgtgtc agatgcagca aagcagcccc aaaacagaa tgagcctctc  
36721 ccatgtttca cagtagggac agtgttcttt tggttggatg cttcattttt gagtctacca  
36781 acatagagct gatgtttctt accaaaaagc tccagtttag tctcatctgt ccaaaggaca  
36841 ttttcccaga agctttgtgg cttgtcaaca tgcattttag caaattccag tttggctttt  
36901 ttatgatttc ctttcaacag tgggtgtctc cttggtagtc tcccataag tccactctgg  
36961 ctcaaacaac gacgaatggt gcatctgac actgatgtac cttgatctag gagttcacct  
37021 ttaatgtctt tggaggtgt tctgggtctc ttggatacag tttcaacaat ccgtctctc  
37081 aatttcagat caatttctc cttctcttt gtaggttgtc tactgtccc tgagcctctc  
37141 acttctgaat aatagctgcc actgtggtca caggaacttc aagctgcaca gagatggttt  
37201 tctagctttt acctttacc tgtttgtcta taattttgtt tcttatgtcc tgggacaatt  
37261 ctctcctctc ttctgtgtc catgttcagt gtggttcaca ctttttacc aaacagcaac  
37321 gtgactatth gtctcccttt aaataggcaa actgattatg ggtttgaaaa cagctgtgat  
37381 gtcatttaaa ggacatacct gagttcatca tgaccctctg ggcaattagt tctcagctt  
37441 ttatggaggt accatcatt ttctccagc ctatttcatt agttttttt ttaaatat  
37501 tctgttaatt aacaactcaa aagtaatggt taagtcaaac ttgnnnnnn nnntatthta  
37561 tcaatgacac tggatcaga tctgtttgtc cacaataata ataaaccatt tgtcacggta  
37621 ccccaacca gtcctctctc ctcgataggt ccacctgcg acaccagctg tgccgcttt  
37681 tctcatcag cggctggact cataaggaga acctggacct gtactcgcta gttcgttcta  
37741 ctccacgggt catcctctgg cctgttcat gattattgtt catgcttctg atgcctcgcc  
37801 taaacttggc ttgtctctgc ctgcctagga tcacgtccac gctgtcacg ctctggactc  
37861 agactcacct tctctctggt cctcctctg cgcctctctg gacatctcc ggaagaacg  
37921 gtgtttgccc ccaagacct ccaaccatcc tctaaacgtt ctctctgga actctgtcat  
37981 tctcaaaat taaatccatt actactcatc ctcttctgct gccgagtatt ttttccgggt  
38041 tocagcatct gggctctgca cagtctcgct agccatgaca cattttatt ataatgcatt  
38101 ttttattaaa tgaacctca aagttcaaca ggatacagtg gtggacaaa ttgttggtac  
38161 cctcagttta aagaaagaaa gtccacaatg ctactgaaa tgacttgaat cattgaaat  
38221 tgcattgaa ttaaaatgta ttgaaatca aataatcaaa atcagacctc agtttttagt  
38281 tgttaattaa cagaattatt tcaaaatgat ggtaccata acttaattt ttgttgccta  
38341 accttttgag gcaatccctt caatgaaacg gtttctgtat ttgtcaatga gccttctaca  
38401 cctgtccaca ggtatttcgg cccctctctc atgagcaaac tgctccagtt gtctaaggtt  
38461 tgatgggtgt cttctccaaa tggcatgttt cagctcctc cactgatgtt caatgggact  
38521 tagatctggg ctcatagaag gccacttcag aatagtcaca cgcttttctc tcagccattn  
38581 nnnnnnnnng gaccctacat gtctaagtg caaataaac cgaaagagg ggggccact  
38641 ccataaggca acctagag gggggcatt cccaagtgc ccccccca agctttgatc  
38701 caggctaaac ccccccccc ctccacctaa tatgaggtta tataaggag ggggtaagta  
38761 gtaaatgtgt ttttaaagaa aactgtaaat aatgtttgac tgcattcctt ctttaaaaa  
38821 attttaaat ccaacttaat attaaatgtc aggatcaata cctgttttgc taaaatatgg  
38881 tgaattcctt ctttaaatg aaaaagtaac atttaacaa aatgagtaat attccattat  
38941 ttagagttac agagctggta aaacgatgaa gtacaacaag ttttgtctaa atacaataaa  
39001 cagctgtttg actctgattt agtctttaa tttcaatcag tttttatgca tttatgttca  
39061 aatctttaa agattcattc atgtttagtt ggagtttctc tgttctgctt ctctctgcta  
39121 actgtcatga ttctctccac attttgataa gtttgattaa ccattgcagt tttttgttta  
39181 cgcaacaggt ttcatgttgc attctgggaa aagttaatac acttaagttt acctacttt  
39241 tatttttagt tataattata aagattttat tcaaaaaat tttttggtga aagttaaaaca  
39301 caaaagcagc ttttaggaat tagtcaaata tattgaaatg ttaaatataa aactttaaga  
39361 gaaataaata cttttcagac attaaaggca ttttatcata aatgttaaag aataaaaaagc  
39421 atcagatatt tttcccgtaa ttgttttat ttggcaaatg ataacgatgt ttcacatttc  
39481 cttaaggaa ttatttctt attaacattt aacctgttt ttaattttat ttcataatgtg  
39541 atatttagag atgtaaaaa ttaacaataa tacgttttta gttttttaca gtgaaacaga  
39601 aactgacatg actcagcatt ttgactgtaa tgcattttca tgtttcaaa attttgactt  
39661 ttgaaatctaa gattcacaac aaatgatgta aaacaaaatc atgaaaaatg taacagaagt  
39721 ttgattcttg caaatgttca gtttgatgca gattgaagaa aacttgaaag aaactttaat  
39781 gtctaacttt gcaattttca ttctgtttct catctataat ctgaaatgaa aagtgtatga  
39841 ttttttatt tacatattat tattataaag aatccatgtt cctgttgagg tgagtgtttt  
39901 ccatagagac actttgcatc agcagctcca tgctccagtg ctctgggaga ctttatagtc  
39961 ctgagagttg aagactggat gactgacagc tgccttctat cacagcagaa gacacagaa  
40021 tctcctctc cctgatcttc ctccaaaaca tgagtgtgat gtgcatctc atctggactc  
40081 tctctgtctg ctgcttcaca ggtaaagtcc agagaatcca actcctctcc tctatgaaaca

40141 tccgtccctc tgaaatgaag gccacaaaag catgaagctg ctttctgttt ctgtctctgt  
40201 ctccctcagag tccagaggac aggtcacagct gactcagcct ggagcagtgga gctctgctgt  
40261 gggaggaatgt gtctccatct catgtaggac cagtcaggat gtttaattat ggaacagatt  
40321 ttacatatta tcctgggtcc aacagaaaga tggagaatct cctaaactat cctattaccg  
40381 tgctagctct cgagcttcgg ggattccaag tcgttttaca ggcagtgat caaactctga  
40441 tttcactctg accatcaatg gaattcaggc tgaagatgca gcagtttatt attgttttcc  
40501 tgaattcaaa atcaacagca aattctcgtt cacacagtgga aaaacagtcg taaaaaacg  
40561 tccgccagtc agacggaaca gaaactgatc tgatacagtt caatgaagac acacacctat  
40621 gcacacacac ttttacatag gttaacttta cagctatcca catttgatta cttatTTTTT  
40681 catcaaaaagt ttcttgggct tcaattttta aagaaattga atcttagctt ctaggctttt  
40741 tattaatgat gtttccattt aaagactccc aattttttaa gaaactctg taaagatttc  
40801 aaatthagga tttttaagga taaagtattg atgcatcaat ggtaattca gttgctattg  
40861 cagcattttt acagttttta agaaactgaa agatcagagt ttgaaaaaaa gtaataaatc  
40921 attctttatc aaaatgtaac tctaaatata caggtgtaa caatagacca gatagaattg  
40981 tatttagagg atgtattgtt catggcattg ttttggagtc tatggaaaca aagaacctgt  
41041 ggaatttctg cctcctgcac tgtgggagtc tccgtctgtc aatctgtctc taaagatttt  
41101 gtgtcgagcc tccactgact ggtgctgttg gtgaaggaga aagtttcaat gctgtcattt  
41161 agtttgactg acatcctcct cctgtttgtt gaatctctgt cagagctttt tgaaccttg  
41221 ctctggagga gctgaaacca ctgagaccta aaaggTTTTT agcatgaggc gtgcccactt  
41281 cagaggaacc ggatctactc atgaggggaa agcggctgtg gtccctcttg taaaggcaag  
41341 gcacggcaat tcgtacacag agtaattcaa ggtgcttcc aaaacagaaa aatgcattaa  
41401 aatcacaata catcatagaa ataatcaacg taaaatttac taaaaagaa aagaaaagat  
41461 ttgaaaattg atttaaaaag aaaggaagga aagaaaagaa aggtgcagat aggacctttc  
41521 agtcatatac acggctaaac agaaatgttt taagtctaga tttgaacatg aacacagaa  
41581 aggctctgtc tacgacttca gggaggctgt tccagatttt agctgcagaa tattgaaacg  
41641 ctgattcccc ttgttttagt ctgactctgg gaatcaacag gaggccggcc cctgaggtcc  
41701 tcagagtatg agatggttca tatggcacta acatgtcaga gatgtacttt ggtgctcggc  
41761 catggagaga cttgtccaca agcagagctg ctttgaagtc tattctttga ggtacagga  
41821 gccagtgcag agacctgagc acaggactaa tgtgatcata cttcctgggt ctggggctc  
41881 atttatacaa ctttgcgtag gatttgcgtc agaagtggcg tacggatgaa acatagacg  
41941 tgcgtacgca cagaaatatt cggatttata aaacctgcgc caccgtgcga gttgaagctg  
42001 caaaatgtgg atccatatca tattgaactg catgggtag gaatgggatg gaactccagt  
42061 tcagatgagt aaaggaaggt gagtcaatac ttttgctaat aatggacact gatgcccttt  
42121 acaatctgat ctttctttct cagttccgta aaaactgtaa aacagcttca gtacatccag  
42181 aatgctgctg ctcgagtcct gaccaggggc ctcatttata aacgttgcgt acgcacaaaa  
42241 gaagggctac gccactctct acgcaatag tgagatttat aaaaagcaaa cttgacggga  
42301 aaatgtgcgg tccttcacgc aagcttctag ccaggcgtac gcacaaaaac ggggtgaaatg  
42361 agaaacggca acaccgtcga cagatggaag aaacacgtga aagtgcagat gtttgccaaa  
42421 gatgcgcatc tttcccttta taaatcacia ccgtttctaa atgcagcgca gcttttgcgg  
42481 cttcatgaca cgcccatagt tgcccataaa tagtccatga aacgcccaca aattaatatt  
42541 catggcttgc taaatcttgg caaacaaga tcgtacgcct tcttttgtgc gtacgcaacg  
42601 tttataaatg agggccctgg tcaggactcg agcagcagca ttctggatgt actgaagctg  
42661 ttttacagtt tttacggaac tgagaaagaa agatcagatt gtaaaggga tcagtgtcca  
42721 ttattgcaa aagtattgac tcaccttctt ttactcatc gaactggagt tccatccat  
42781 tcctaaccce tgcagttcaa tatgatattg atccacattt tgcagcttca actcctcggg  
42841 aagactgtcc acaaagtga ggagtgtctg taggaatttt ggaccattct tccaaaaggt  
42901 cattgggtgag gtcacacact gatgttgggt gagaaagcct ggctctcagt ctctgctcta  
42961 attcatccca aagctcttct atggggcca ggtcaggact cagtgcaagt cagtccagtt  
43021 catccacacc agactctgtc ctccatgtct gtatggacct tgctttgatc acaggaacac  
43081 agtcatgttg gaagaggaag gggccgctcc aaactgttcc caccaggtt tgagcatgga  
43141 attgtccaaa atgttttgggt attctgaagc attcagagtt ctttgtactg gaaccaaagg  
43201 gccagtcctt gaaaaacaag cccacacat aattcctcct ccacaaaaat gtcttccaaa  
43261 cccacgctcg tccatcagag tgccagatgt aaaagtgtga tccatctctc cagagaaggc  
43321 gtctcctctg ctctagagtc cagtggcggc gtgctttcca cactgcatc agacgctcta  
43381 cactgcagtg atgtgtgtct tggatgccgc tgctctgaca tggaaacctg ttccatgaag  
43441 ttctctgcct gttggacttg taatctgaag gtcacatgac gtttggagct ctgtgcaac  
43501 tgagtgcaga aagtcagtga cctctttgtg cttcatcatc cgtgacccc tctgcatcag  
43561 tttaagtggt ctaccattag gtgactgagc tgctgttgtt tccaaacaac tgtgtgact  
43621 gtggaatact ctaacctcca gcctcgccac gactccacgc caagcctcca tccaggaag  
43681 cttactcacc taatggctct cattccatct ccttctgccc agccatcaca attaaagttc  
43741 cttcgacatt cctggacaat aaagctttct ataatccact acagactagc ttgatcttct  
43801 aggttccagc atctgagctt attttgtcat tgctgataat gacagtgaac tgttctttta  
43861 tttaaaatga tcaactgttca taccacaact ctgtttttat tattgtctg tgtttataac  
43921 ccagtcagaa totcattat ttctcaaatg ttagaaacta aatgtaaat taaacacaat  
43981 atatttgaag gtgtgtgtgc ctttgtgggt gtgtgtgtgc atgtgtgtgt ggttgtgttt  
44041 gtgtcttcat tgacctgtat cagatcagtt tctgttcagc cagaatgagg ggggtttttg  
44101 tacgactgtt tttcactgtg tgaacatatt tatactgttg atgtagtga aactctgaca  
44161 gtaataaact gctgcatctt cagcctgaat tccactgatg gtcagagtga aatcagagtt

44221 tgatccactg cctgtaaaac gacttggaat ccctgattgt cgagtgcctag cccagtaaat  
44281 gagtagttaa ggagattttc catctttctg ttggtaccag gataaacagt gattgctttt  
44341 ataacataaa acatcctgac tggttctata tgagatggag acagttcctc ccacagcaga  
44401 gctcactgct ccaggctgag tcactgtgac ctgtcctctg gactctgag agacagagac  
44461 agaaacagaa agcagcttca tgcttttctg gccttcattt cagagggagc gatgttcata  
44521 gaggagagga gttggattct ctggacttta cctgtgaagc agcagcagag gagagtccag  
44581 atgaggacgc acatcacact catgttttgg aggaagatga ggaggacgag gaggatttct  
44641 gtgtcttctg ctgtgatgaa ggacagctgt cagtcacca gtcttcaact ctcaggacta  
44701 taaagtctcc cagagcactg gagcatggag ctgctgatgc aaagtgtctc tatggaaacc  
44761 actcactcca acaggaacat ggatcatctt catcacgtaa tggtaaataa taaaatgcta  
44821 aatgtttctc tgaattact gatttttcaa tttcaaaaaa ttattttaac attttcttg  
44881 tattgtcctt aatgaattga ttgaatgact ttgttcaaca tgtgaagaaa ctctctgctg  
44941 tcatggttca tcagtgaagc ttgtctctg ggccaaaaca agaaagtcaa aggtcttttt  
45001 tctatgttca gcaaaactgaa acagaaaaaa cagcatttta gctttttcat gtgactctgc  
45061 tgctctctga tggaaaccaca gtggaacatc tgatggtttc atgtctctgt atttctgtgg  
45121 gtttatttaa atcagtcatc aggcattccc acaccaagat cccaccgca gaagcagcgg  
45181 cagccagaaa aggcagagaa caaccgccc cggggcaatc acatccgca cccaggccag  
45241 ggccagcgac ccgccacagg gggcccaaaa gccaaagagc agagaggaag ggggggacag  
45301 agagtgcaga tgtggcccaa tccggaaaagc agccccctg ccatgccagg agggcccaat  
45361 gtggggcccc gcagaagagt gccacagcc ccagacaagc acctcatcac caccaggag  
45421 ttctgggcat cccccagccc caaccocagg tactagccag aaccoccaa gggagaaccg  
45481 ccccgactc caggcagcca ttgatgtgtg tgaggcagcc attgatgtgg ttggtcattg  
45541 tgttgtatct cgagtcttcc tgaaccttct gcacatctta tagtatcca aaacaagaaa  
45601 aaataaagat ctaaaacag gatgtccaaa tccaggcctc aagcgcagat gtcctactgt  
45661 acatgtttac gacctaccat agaaaattct taaacacacc tgatccagat aaacagcatc  
45721 agacaaggca aggtttctgg atttggacc ccctggctca aatggccaac aattaccatc  
45781 aacaggctgg aagtctgaaa cacagtaaga acacattaca gtcagatcat atagactaga  
45841 aatgacattc atttcaaatc tattgttctt gttccaataa tctggactga atggatcctg  
45901 tgatttctcatt gtttctcacc atttctgttt ctccaacagc agtagaggac tccactgatc  
45961 accaggagca gaaccactcc agctgctcct ccaacaacag gaccaactgg aaactctgaa  
46021 ggagaaaactg agtagaaaaca tggatcaaac tgacattcag ggtcaaaaaga cttggcagat  
46081 caaaagtgtt tgagtgactt cttgttagaa actcctcaca tgcttctgtt ttaaagatga  
46141 tctggattag gtaaacactaa ggtgctgggg ctaaagttaa caatcttacc ccagtttgtc  
46201 tgaatctgtg ttttgtccag catggagacg atgtcttctg ttagtccaga gagctggaac  
46261 acacagtcac acctcctcca gtctctcatgt ttgatcaatg aaacgttcag ctctgagctc  
46321 atctggaagg ttccatcatg gttaggtag atctgtcctt tctccacac ctcatgaatc  
46381 tctcctccat cttcctcca gaacagatg gctctgtcac gataaaaacc agtggcattg  
46441 cagcagaccg gagaggaggg agtcttctgg agaaaagata ctgaaggagc ctctgcacaa  
46501 agaaaataaa gggaaaaatg tctcccatat tcagcattta tttgtgtgaa ctagtaagtg  
46561 ttgttgactc tacctgttct ctgcagaaaa ctctcccat agtgcatgtg ttccttaagc  
46621 aattcaggac atgatgatat gtgatagatt ttaaagtgtc ttaatctctc tttgtctgca  
46681 tcccataaat gttttatccc aacacctgtg gtttttggag caatccatgt ctcggtctac  
46741 aggtccacag agatgaagtc ttcccatca acactgtact gttggaacc tttgacttca  
46801 ttgctttcat cgtcccactg taaggattca gtggtttggg tttcttctg cactggtcca  
46861 ctttcagggt catgatccac agctgtcatc agttcagtta attaccatca gcctatttaa  
46921 gtgtcgtggg ttctgttcat cctgtcagg tcatctgctc tgttttctca caccatagt  
46981 tttgtcacgt ttcagtttgt ttatttaatg ttttatttcc tgtcaccagc cttggctcc  
47041 tgcatttttg gtctcctacc accagttcct gacaccact cacagacggc tattctttgg  
47101 agaacatgag aacctgaaca ccaaagaaga acactaaaac tttagaagtt taaggcaatt  
47161 tgaaaagtct tatttagatt ttcatatata tttatttaat tttcatttaa ctttatttt  
47221 accaggaagt cattttctct taggtctcct gggcatgtcc cactgggagg aggcctggg  
47281 gaagaccagac gacatgctgg agagaccagc tttctcggct ggctggaac gcctgggggt  
47341 cccccagag gagctagagg aagtggccgg ggcgaggaa gtctgggcat ccttgcctag  
47401 actgctgcc ccgcaaccga gataagtgga ggaagacgga tggatggttt atttaaccaa  
47461 ataatgcaat tttccagaca tggcattcaa caatccgag agggaaagtga aggagcaaaa  
47521 gatacacact gaaggtgaga aaaattaaa acacctaacc tttctctcat ctcaaagtg  
47581 atcaaatcaa ttttatctct taatgctgct agctgcagt cgaaaaaaaa catcaacaaa  
47641 agttatgttg ggcggttttt ggctgggtct ggcggttttc agatgacttt tgggctggaa  
47701 aactatgact ctatctggca acactggcgc gaactctctg tcatcagcga gttggctttt  
47761 gccccgcagc acgtcaagtt cccggcagaa gatcggagt tttattgaag ccgccccgcg  
47821 tgcctctccc tgctatcagc tctgcaggtc tgcgccgata aatacgagat catttaggaa  
47881 gctgggtttg acgtggtagc cgcttcgtac ggagccagca gatgaacaaa ctaaaataaa  
47941 attaattat tataaaatac tcattacttt ccaaagtac agggagccac acaaaaagga  
48001 tgaaagagcc acatgtggct ccggagccat gggtttccga cccctggact agagggatgt  
48061 ttctgtgtt tttgtcaagc cgtatttctag taacaacat aaaatcaaga ttagaagtaa  
48121 aatgatttgt tacataaaga tctgacattg agtgacagaa gtttgagatt agtttctagt  
48181 ggactggtca taaccttctt gcaggggatg tgaatagatt tatttgatg ggcagctcaa  
48241 cagtcttttg cttagctttc tacgtgggtg aactgcaaat atagtatcag aagaaagctg

48301 tccatcacag tgccccagtt tgatgtaaca ttcattgactg taattcctgc gacactgggg  
48361 gccagtttca tcctagctct gggagatagc acctctttat ttattttat atttatttat  
48421 ttattttttg agacagcacc tctagaggca cgcaggggag gtcgagttga ggataatttg  
48481 ggtgatttgg caggattttg gtggattttt ccaatctatc aacatgcagc ttgtgtgaaa  
48541 ttgtttttac caacagtgga ggaaataagt acttgattct gtgctgattg tgtagatttg  
48601 tacatttttag aggttgattt ttctaaataa gtctgtaatt ttgggaagtt ctcaataatt  
48661 tttttacgat gttttaggag ttttagggcc acaaaaaagt aatatcacga catttaaaat  
48721 caaacagtta cacttacgtc acttagtttg tcctataata taaaatatga actgaagcag  
48781 gtacactgac taaatgtaga atgcagacag gagttttttt cgtttgaaaa ctgccacaaa  
48841 catatttttt ttagtgaaaa aagaaaaaag aaagaaacag ttgtctgttt gcttcaatgt  
48901 ctaaatctct agctttggct ttaaaattgg ctgtcatttg ctgtttttag ttgcatattg  
48961 actcatgcag acagataata atcagtggat tgatagcagc aggcattgtg tggtttgaaa  
49021 ccagaaagag ttgcagcccg gtattatcac ttagtcatth agtgaactta tagtgctgtt  
49081 tacttaagtc gctccaacat gatataaatc atctgcaaca actaaaatct atgttctcct  
49141 ttgtagttca tgctagcatc cttaaagtaa atgaagcata aagaagcttt aacagaataa  
49201 acagctgcac ttgagtctga ctgtttcaga cattgagaga ctacaatcca tgtgtttgtt  
49261 tgtctgaatg taagaaaaag gatttgataa gtgagctacg taaagacatt caataattca  
49321 ccacagacca ctttcccact gtgcagctaa ctgtgagtta tggggaaact aagtatgttt  
49381 agtttttttt acaaaaataa aaaataagaa aaagtaacat ttctgtgca cacagcaaga  
49441 gatttttttt aatactctgc ttttgtaaaa acacatttat tcttatttag gaatttgca  
49501 tccaattgaa tagataacta gtaaaaaaaa aaagaaaact ggaggtgtag tgtttttaca  
49561 catgctgcta ctctctctaa gtatgtttac agttaaacag gaaatcctgt cctcagcaca  
49621 aatggagaaa atgtttgacc tcatttaaca aactgcttca gtccacctca gagtataaac  
49681 gcagctgcag cacctcttct actgcatcag ccttaagatg gcctcagata tttttgcaa  
49741 accagatttc tccaagaagg tcagatacaa cagaaagcag caagaagaca catcagactg  
49801 gaaggagtgt gaggtggaaa tctacaacga tgcataatga tctgtggagg acaccaccgg  
49861 ggttcagtca ccagaacaag gtaagaatga actcaatctt ctgcatccca gacatgctga  
49921 tcaagatctc agtaccagtt cagcaagaat tagcatttag catggctaga tttgaacaag  
49981 gttctaagtc aggggggtca gaatccaggc ttggaggggc gatatccaac atgttttcca  
50041 accaacctac cattaaaact cctccactg atccaggctca tcgggagcag aaatgggag  
50101 atttctgaaa aaccagcag aggcctggag tttgacacc caagagctc ataactggag  
50161 aaagaatcaa tgggaacaag aggctgaaca ttttgagctg gaactttatt taaaaaaat  
50221 gtaactgaga aatttacttt ttgtttcata accctcagga tcttttgaa aattcaaaat  
50281 gattgtttca tgaagctcaa cggtcctacc acattcaaag aaatttttgt ttttgccatg  
50341 aagagatcct gacgatttct tagtagaaaa ttcaatattt tgaatgcaag ttttaacaca  
50401 aattctgtct ttgaaaagct gtggtcctac ttttgatcag ctattgtgaa gaaactggat  
50461 tttctgaaa ggactgtatt tgtgttagtt cgtaaccccg taagtttctt gcacacagaa  
50521 ataataaata agactcagag acagttactt atctttttgt gaggttttac ttcgcacaaa  
50581 cacgaagggg acagagagat gaacattgtg cattgaaagt ccgaaccaac gagctcaggg  
50641 atgggctttg gtataaaaac cctgcatttg catattcaga agatcgtccg atggacctcg  
50701 tctgaaaatc acgcccacag gttactgctg gagaggagct ccaaggctaa agtgaagata  
50761 agtctgaggg ctgctcagca gaaaacacat gcacagaaaa gagggagat ggggaagaaac  
50821 tgttagaaca atagtttggc tgtgcctctt tcaaataata tataatttg agatgacaat  
50881 acatgctcag tgaattagtt ttaaacattt agtgcaataa aagttaaag cagcctcaa  
50941 ctattcttca cagctatgaa cagtcaattt catttaaat tgtattttta attatttgaa  
51001 ttctaaaaat ttgtgttctt tttcttctct ttctattttt ggtttttgaa ggccacaacc  
51061 tcagacgttg caggcccaaa agcatccatg cacacaacac acgcttccac aatagcttct  
51121 tcccagcagc aatcagaatg ctggcacag atatacagaga ggggaagactg aactgaatca  
51181 tatgacatgc tatccageta ggacactatg tccaataaac tattaactcc acatgtgcaa  
51241 taattcctct gaatagattg ggacactgca atattttatat ttactatat taatagttaa  
51301 cactttgtac ttttctgtc tagttttact tattttattt ccttttaaat ttttatcctt  
51361 tctatattta cctgacatg agagatgcca aagaaaaatt ctgatgtact gtatgtgcaa  
51421 tcggcaataa taccttgatt ttgaaattaa catttttgca ttttcttaac tgggcttttag  
51481 attttgatcc ggagtgattg atcaaaaaac aatagattct tctctgaaag acaaaatccc  
51541 tctttatttt tctctcatag ctccacaaac agagacgtgt cctaaagtcc agaaaagttt  
51601 ctgcagatgt gaacaatggc gtctgtgggt gctgtgact gtctgtcag ctgggatcat  
51661 cattctatcc tcatgtaaga taaaagctaa cacctcaaca tcatagttta gttnnnnnnn  
51721 nnntgcgtgc gtggacacta tctgttttgt gtacatgttg acatgtggac atttttgag  
51781 ctagcaggtg tgttgataac attcgtgtgt gtgtggacag gccccgcct ttttgacta  
51841 catttgaaac ttactgtaat gataaagaac cagtaacctt gttgctttat gctgcttcat  
51901 ggggtgcaaa ctcattttgg ttcgggggcc acattcaacc cgtctgatct caagttggac  
51961 ggaccagtaa cgtaaaagca aaataaagct ttattcttgt ttttttacc aattggaaaa  
52021 catgcttcaa ccaacatggg agcctaacta tttcttatta cacattcat cacagaggcc  
52081 aatagatctt aaataaaatt aatttactt taaaaatatt ggtttattca atttataca  
52141 gcctgaatat tttaaatctg acactgaagc gatcctgata ataaattcaa gaggggctac  
52201 agaaaaaatg aaacatcttc ctatattgta aatgtccaaa caatgacaaa attacactaa  
52261 attaaacctg caaacatttg tgaacataag agtttggagt taacctcct tctctcctga  
52321 aacttcacga gaccgtcaat atcaggattc agatcctgtg cagaacacaca tttactgtca

52381 gtgaagtctg caaaacacaa tgaaatgtcc attattattt ttcattatta taagaatcct  
52441 ttcctggttt ctgcctgaat tttgtggcaa cacctccctt ctccctgacc tatgatggag  
52501 cgccatcagt gaccaaaatg acttcatgtg accagttcac ttcaacaatg tccagcacag  
52561 taactagaga gctgactatg tcatcagttg ttattgtgtc catcaattca agaaacactg  
52621 ctgtgacgtc tcttcatcac ctctaataaa tattcacagc tgtatatac tgtgatgtcg  
52681 gtgttttcat caatagtgtg tgctctggga gtatggggtc cagggaaacct tactgagggc  
52741 tgaccggctc ctgtatgacc agagcaagag tttggttcgc aagtcagacg ttttcccgg  
52801 gcatgttgga ctccggcagg gctgcccttt atcaccggtt ctgttcatag tttttatgga  
52861 cagaatttgt aggtgcaacc aggcagcggga gggatctggt ttgggaccac aagatttctt  
52921 ctctgctttt tgcagataat aaacggcttc atcggggccat gacctccagt gtgcatggg  
52981 gcggttttgc accgagtgtg aagcggctgg gatgaggata agcaccacta aatctgaggc  
53041 catggtcctc aaccggagaa aggtagtttg ccatctcttg gtgggtggag tgcctctgcc  
53101 ccagttggag gagtttaaat accttggggg cttgttcatg agtgagagaa gaccggagct  
53161 tgagattgac aggcagattg gagcagcatc cttagttttg cgatcgctgc atcggctccg  
53221 tgtggtgaag agagagctga gctaaaaaga aaagctctta atttaccggt cgatctctgc  
53281 tccaatgctt acctttggtc atgagctatg ggtcatgacc gaaagaacga ggtcccgaat  
53341 acaagtggct gaaatgagct tcctccgtag agtggttgga cgctccctta gagacaggt  
53401 gagaagctcg gtcaccacg gagagctcgg agtgaaccg cttctcctcc aatcctgagg  
53461 gagccagttg aggcggccca agcttttagt ccggatgctt ccctggggag gtgctccggg  
53521 catgtcccac tgggctggag ccccggggaa gaccagggac atgctggaga gaccacgttt  
53581 ctccggtggc ctggaacgcc tgggggtccc cccagaggag ctagaggaag tggccggggc  
53641 gagggaaatc tgggcatcct tgctcagact gctgccccg caaccagtt ccggataagt  
53701 ggagaaagac ggtggatgg tttatttaac caaataatgc aattttccag acatggcatt  
53761 caacaatccg cagagggaaag tgaaggagc aaagatacac actgaaggtg agaaaaatta  
53821 aaaacaccta aactatcttt atttacctc atttgtcttt tttatgtct gcaaaactggg  
53881 ttaaaactgt ttctaactga ggaaatatag agacagtaa gcttaaaggg ataccttaac  
53941 aatgccctct tgattatctg tttgtctggc atgtgtctgc gaaggttctc attcattccag  
54001 gtggcattat tttcaagtgg agtcatagca agtggactta tttatgtcac aagaacaggc  
54061 agacagctgg atccaaatgc agcaggttta ttagctgagc tagaagtcca caaagctaaa  
54121 tcagggtcag gcatgcagga gtcgataaaa ggcataagat catcaagaag agacaagatg  
54181 gtccaaatcc agacagcgt ctgggcagcc ggcagaagat caggtccaga tgtaacactc  
54241 tgtaaagaag gcagaatggc aaaaacaata ctttacattt agctcagctc agtacacatc  
54301 ttaagtattc tgtggttgat tgagtgaatg agagacaggt atgttgcaag ctgggtgtgc  
54361 tgggagatga attgctttca gtattctgga gattgggtccc ggtggagccc ccctcctgct  
54421 agtggcttgg gaagcggagg gccctccaat tcaaaccaga ggcaggggat aacgatactt  
54481 aatagtcaaa tcaactaaggc tgtagaagtc aatacacagc ttcaatccac catctttctt  
54541 tttgacaatc aagaagccgg ctgaggctgg agatgtagat ggtcagaata agcttttgc  
54601 aactcctcca tgatgtaggc atgtatgact gtgactcagg ttgagaaaag agcaaacccc  
54661 gtcctcaggt gggcatagct ccgggcagca aatcaatgga acagtcgat aggaccggtg  
54721 tggagggagc tgggggttac gttgcttatt gaagttagac aggcattatt tctactgatt  
54781 ggctaaaagt catctaggat cacactaatg ctggcaatag tatcgacaaa cttttagtaa  
54841 agtttaaaac agtaaaataa gaactgttag tghtaacagt tgaaatcaag ttatttttaag  
54901 tgatgtgggg gtcattccag ttctgggtcca ggaacttctg ttctggacgt tgatgtctgc  
54961 agccaggtcc tcttcaccgt gacagcaaaa catgaggctc agtgttttc caaaggacac  
55021 ttgaacacat gtgcagctcag attgggaatc aaacctgcct aaactggctc actgctgcat  
55081 catgaccccc ccaccaccac caaaagtgtc tghtgaaggc catgtgattg ttcatttaag  
55141 tacaatcaat aatacatgga cttttactgt ctttcaggca tcaatgaaac tcttttggat  
55201 gaaataagac agctgaaaaa tcagattgaa ggtgagaata gactgaaaac gaatggatta  
55261 ttttaagttg tttgatcacg tttacctttg aacttttttg ctttgtaaat aaatgttgat  
55321 atgaaagttt tagttcaaaa tacgaatgcc tatgttatga gaaaaaaca cgatttgatc  
55381 aaaaacaata ttatcattcc aatattgatg aagacaaatg gatgtgacc aaaaataaga  
55441 cctcctgaat aaaactctcc atcaatattt tttcaggacc agacagattg tacagcttcc  
55501 tcttaggaag gggagcaccg gggaggagat taatgtagcc gtcataagga cggtgaggag  
55561 gcaggatgct agctttattt ctacaaaaga tacttctcaa gtcgtgatta caagtgggga  
55621 gtttggatag atcagatttg tcggacggaa tagtaatggg agtagacaca gggggaaacgg  
55681 cggactggag gcagttggcc atacaaaagg cactccagt cagaatatga cggtaagtcc  
55741 acttcaacag aggccttgtg aattttagcc aagaaaaatc caaacagatg ggagatgctg  
55801 tggacttggg aataaagatt tgaatgtgtt ccccataaca acctgaagag attaagagta  
55861 tgggtttggg gcgatgggtt ttgtgcgaaa gatgttgccc acctagcca gagacttcca  
55921 tgggggtgtc caaaggttct gttggcagag gcaatttggg aacaagatga gaatcaatca  
55981 ggctttgttc agcactagag tcaatthaag cttgaaaaatc gtggacttct gagtttaaac  
56041 agatcttgac agataagaag aaaaaaata ttgtttgtgt aacttacaaa aacaccgcc  
56101 cgtggcctat cttctagcgg ggggctctgg aattaaaaca agacagacac tgattacta  
56161 aatgcccctat tttccacag tggaaagtata atccctcctc gggacgttct tggcgttctc  
56221 cggcagagag tttagaatgt cctatttaca taggtttgtc cgtaggcttg agataagaag  
56281 tgattataga aggaggaggt gagtttgaag tcattgctga gacaaaggg ctgtgagatg  
56341 gtatgcggga ggattgtagt tgtttattt gacgttccc aagccgcata tcggaacgaa  
56401 gggccgcagt tacaagctct tcaaaggagg tggcctcaga aaagaaaaaa cttttagtaa



56461 agtttaaaat ggtaaaataa aaactggttag ggttgaaata aagttttttt gattgatgtg  
56521 ggggtaattc cagtccagaa gtccaggact tctggttctg gacgttgatg tctgcagcca  
56581 ggtccttttc accatgacaa caaaacatga ggctcagtgt tttgccaagg acacttgaa  
56641 caactggcag gcagattggc aatcaaacgt gcctaaactg ctcaacctct gcactgatgac  
56701 caaccccccc actaaaatga agattgcttc gtatctgttg aaggccatct gattgttcat  
56761 ttaagagcaa atcattaata aatggacttc tactgtcttt caggcatcaa taaaactctt  
56821 ttggatgaaa taaaacagct gaaaaatcag attgaaggtg agaaaagact gaaaactaat  
56881 ggattatgtc aatttgcttg atcatgttta cagttgaaac cagaaaagta accctgcagt  
56941 atttttgtat atcagtcttt gaaggtaaac ggtgtcctga aggatggaag agatttggat  
57001 gcagctgcta ctataaatcc actgagaaaa gaatttggta taacagcagg agtttctgtc  
57061 agaaaaatgg atctgatctg gtggttgtaa acagcaaaga ggaacaggty ggtgtgttca  
57121 cactagttcc ttccagcttc ttgtgtcttg gattctccac ctgtatgtgt gctgctgttg  
57181 tctggatgct gatggattcc agctgaaatt ctctcaaca actcagattt catgtttgtc  
57241 tttcagcaac atttcaaaga aacgttgtga tggaaacacag aaactctttt tcccacttct  
57301 aatgtcttca attccaaata ggctaaactg ggattcagta gaaatggact gttggcctg  
57361 aagacaaaac aagaagcaaa aactaaatga acagatatct gcacaaaaga aagtcagatt  
57421 ttgttctcta gatgagcttt ctctcagttt taggacacgt atccagaaca gatgaactct  
57481 aaagacgaga catttatttt ttttaatttt ttaagacca gacattgttt ttactggact  
57541 attagtgtga aaggaaacca cgatggtgag aatgcattaa gaaagaactt ttttttctt  
57601 tactaggagt ttgtttctac attgaatcag aatgcagaat cctggatcgg tctgtttgtc  
57661 ggatggtcag tccagaaaca gaaatagtaa tggaaatggg tggatggatc accactgaca  
57721 gaaatgtaag actttgtttc ttttacaacg ttactaaatt cattctttat gactgagcct  
57781 gattgtaaat gtgtgaaatc ctttaaaaaa tgtttgaaca tcataattca gaccagtta  
57841 tgaactgaat ttagaccaga ggtaaacaga atgttttatc acaggttctt ggatgagagc  
57901 atttcaaaag accggaacaa ggatgatgca gtgttcttaa gtactgaagg gaaatggaaa  
57961 caacaggaca aaacaaactt caaaaactgg atctgtgaga aaaacagttt tggatctttc  
58021 tgttctctgc ctgtgcattg atttaactgt ttagtaatgt aagtaatttt ctccatttt  
58081 ttttttcat tacttctaca aaatagtgct taagaaaagg ttgtttttta gtttattgtg  
58141 atttattcat agaaatgaag ttgtcatcta tcaaaaactt catcacattt aaatatcagt  
58201 gaaaatgact cagataaaca ggaactgta ataaattttt atttttat taaccaggaa  
58261 agtccattg agattaaaaa actcttttcc aagggagtta tggccaagag gcagcagatt  
58321 tcaatacaaa atttacataa aaacaaacat tattaaaacc atatacatta taaaagcag  
58381 ttgcacatta ttgtttcagt ctctgatgct ttgagtttga ttttaaaaac atttaaagat  
58441 ttaaggtcag tgagtttcca gtctttctgc agcatattcc aagcaaaaagg agcagagtgg  
58501 aaaaaggctt ttttccccag ctaattggta aatggcgtat actgatatag cgctttctac  
58561 cttcttttca aggcccaaag cgctttacag tcacagtccc attcacctc gcacacacac  
58621 attcacacac acatccacag ctctgtgcag aaaaatggga cagaaagcaa ggttcttta  
58681 gatcttaagg tgtgagattc cacacttctt gtcattaaag aacaaaagta gggaggcagt  
58741 aatccaagca aggccttcta aataaaagt taccaatgtc cctgcctcct ggtggacaga  
58801 gatgtccaat ttgctcttga atacaggcca caataatgca tcatggatct acagttggt  
58861 atgaacctca ggggaagcaag atccatggtg tcaacctttt tgagacatga agatgaggca  
58921 ttcatataca gaatatcacc ataatccagc acagacaaaa aaaagtgtct gcaacaagac  
58981 gcttttctac ttcaaaagaa aaacacatat tatggaagaa aaagccaagt ttaagtttga  
59041 ggtgtttttt ttttcaagt tttcttttgy aggtttaaag gtgagggagt ggttctccg  
59101 gacaccaagg tacttgtact tatgaaccaa ctctatgaca tgtccatcca aggtggacac  
59161 cattggaatt gtatcagga ctttctttta gtttgaaac aaacattagt tttatcttgt  
59221 cagcattgag aaccaatttt aactgaataa gtgagtgctg tactgcaaca aaagcttct  
59281 gcaaggtttc aatggcctga gtaagagatg attcctaaca gtaaatgact gtgtcatcag  
59341 cataaagatg tagattagca tcagagatat ttcaccaag tcattaatat ataaaaataa  
59401 tagaaggggg ccagaactg agccctgtgg caccctctg tggacagtat caaattcatt  
59461 taaggaacct gatgataaaa aatgcctaat taaagcaatc caggacttca gttttatcat  
59521 taactactac tgaattttta acaacagaag taagaagtgc ttgattcatt ttagtcacag  
59581 aaagagactt gatcactttc cagaatttct gtgggttatt aaggttctca gtagtggag  
59641 acaaaaacaa ttcagatttg gtctttttt atataagaga agtacaccta ttcctaagct  
59701 gtataaaaac agatcgatca gtggaagaat ctgtatgtct tgccttgttc catgctctat  
59761 aatgctcatg tataatatct gcaagttcct gtgagaacca gggattttca catccctaa  
59821 tctacattt ttgtaaaaga gcttgtttat ttactatttg taaaaaaaaa acaaaaaaaaa  
59881 caaaaacaaa actttcctta aaaaatgcc aagccagctc tacgtctggc agtagaccaa  
59941 tatttatcca tttactgac aaatcatgat taaagagctt gctcattaaa atgtttcaga  
60001 ttcctcttac aaactatagc gggtttcat ttaggaattt tattgtttct gcaaccaca  
60061 acacaatgat cactcaaatc attaaagaag caaagacacc aagcggagaa aatttatgcy  
60121 gcacatttgt taaaacccaa tcaatlaatg tgtacttttc tgggcatttg agatttggcc  
60181 tggtaggtat gttcactatc tgagtaagat taatggaatc accagccaga agtaattcag  
60241 tgaattttac cgtagtcaaa agctgctgta gtgaaaaata tgcctgtttt gaagcagatg  
60301 gaggcctgtg gtatccaata acagtaataa aaagagattt tactatttct acattcaag  
60361 caaaaactc caattgttta cagattgatt gtgacaaaat aacaaccaag atttaatgct  
60421 tgaatcattg aatcactgcc tctttttct gccctgtcag tgcaataaac atgtacca  
60481 gatttgttaa tatcttcaat agtaatagat ttagttacaa gtttctggaa ttataacaac

60541 atctgcacct gttagatttaa cccaaattct gactaagtcc atcttttgta gcaagctgtg  
60601 caaathtaaga tgaaaatatt taaccaccgt caatgatttg aaatcagagg gagtctggca  
60661 atattgacagt gcagaccag gattaaccgt tgtataatta ggagaagtgt gtgtgaaccg  
60721 ggggacagcag taccattgga aatacactag aggcaccagt aagccactct cgcacagatg  
60781 aataaaatggt cattctgtgc ccaaaactaaa acatgcacag gaaccttaaa aaaggatgtt  
60841 gaagccattt ttaatagtaa tcttgatggg gatttgatcc ccattccgaa aatgggtccc  
60901 attccttgac tgtgtaaaca gatgggtgtc cctacaatgt cataaatacc aacacacaca  
60961 cactcaaata taacaatgtt ttttttcagc caaaaactat tgttttat tt ctacaatttt  
61021 ttgtttctga cagttgagag aatgaaaatg agattctgac ttgaaattt agacacaaaa  
61081 tataacacag aaaacaaatc agatataaaa aataatggtc atggctgaat agattttttt  
61141 tttctatgat gtacaaatta tttcattagt aaatctatca acttatttaa tttcatttat  
61201 acttttgttc ttatttttca attttatttt aaatagataa aataaaataa tttgacctgaa  
61261 aagaagtggg tagaagaaaa atcttgtgag accccacccc tttttctaac accttatgtt  
61321 gtgcatattt ttcattaact ttttcccctt caaaacattt aaatgatcct ttctatagca  
61381 cctatgcaga agtgacattt gcgtatttgc ttttattgat tatttcaagc cttacaatgt  
61441 ttcatctgtg acatttttga tttcacetta atttaaccag taaagttcca ttgatataca  
61501 aaccctcttt tgcaaaggaa tctggccaa aaagcagcac atggccaaaa agcagcacat  
61561 tgcagcacia aaaatacata taaaaaaat cttgtatgtt ttgtgattac aggtaccccc  
61621 ctccccccat ctcaggatgg aagtacagag tgtggctgtt tttcaggtta acttgttcca  
61681 ataatttcaa taaaccgac tttaaaaaca gtgcagttgt atttgtcca taatccacac  
61741 catgaactat tcaaatagct tttttctggt aagatgttgt cagaagtcaag aactctgtcc  
61801 ccccatctgg tcaccagcca aagttatacc acactacatc tcccagcaac cccggcgcac  
61861 acacctgact ttcattcact caatcacgga cagcactact aaacgctgca ctgaatgtg  
61921 tctctcttgc tatcaacttc cagcattttc catggttggaa aaatgatgcc agtataaagt  
61981 acattattta ataaaaatac taatggagga taaatgtgtg aggagccctc ccccccccc  
62041 taaacacaca caaaacattt tacagactaa tagaccgat cacttttgcc actgtcccat  
62101 gtgcagctgg gggatctggg cctgtcatgc gatgacattt tcagagtta ttggctgagt  
62161 ttccatcctt gaccaccccc gctttttcct ccactgtggt taagcacgga gtggagcatt  
62221 taattcccac taagggcctg cctgtttttg ctcgggtacg acaccttgat gcagcaaaac  
62281 tcaccattgc taaggaggag ttcgcccaca tggagagtct gggatcctg aggcctcta  
62341 acagcaccgt cacatggtgc caaaggcata tagttcctg cgcccatgca gggactttca  
62401 ccgtctgaac gatgggacga cacacctgac cattatccca tccccagga tttctcgctt  
62461 cgtttgtgag ggcctcaat tttttccaaa gtggacctgg tgcgaggta ccatcagctt  
62521 ccggtgctgg ccgaagatgt gcctaagact gcggtgatta ctcttttg actttttgag  
62581 ttctgctgca tgcccttctg tcttaaaggt gcagccaaaa cttttcaaaag gttgatggtc  
62641 tctgtgctcc tctgaagagc atctctgca cctaaaggac gttttccagc agttgaaac  
62701 ccacggctg attgttaacc cagctaaatg ccagtttggg ttgtcagca ttgatatttt  
62761 gggtcacgca atttcgtctg cccaccaaag accaggctgt ggcaaatttt ccccgctctg  
62821 cagtgggtaa gtccctacag gagttcttgg ggatgggtgaa cttttacaac aggttaattc  
62881 cacgggctgc ccacatgta caacccttt ttgacagctt gcgttccaag aaagccacag  
62941 accctgagga ttggacatca gaccgcatg ctgcatttga cgggtgctaag tcagccttag  
63001 caaaggctgc tctcctcgcg caccagacc cagatgctga aattgcgctg actaccgagc  
63061 cttcagacat agcagtggtt gctgtgtag aacagtgagt ggcggacgct tggcagctc  
63121 ttgcattttt tggccacaag ttgcagactc gggaaacgca gtatagtgt ttgtaccgca  
63181 agctactttc tctatatttg gcaactcaac atttctgttt cgtgtcctgg agaaggagga  
63241 aaaatgtttt gtcttgaca tgggagggcg cagagacttt gtgacagtgg accggctaaa  
63301 accagcgttt gtgttgacag gcgacgctgt gcagccagct caggttctct gccgggggca  
63361 cgtcttccct ccagaccctt agtcactgtt ggtgactgtc agacattttt taaaatgaaa  
63421 aataaaaact tcaaagacga tgaactaatt acaaaaatac ttgataacaa attgaacaag  
63481 tgttgaagct taactttttc ttgaaaagaa gttatgatat aagaattaga tgaattttga  
63541 tgtagtataa atataaatta tttcgatttt ggaaaattga aaaaatgtgc acgtttgtaa  
63601 ataagacaat ttttttcacg catacataac agcccactat ggggaccagc tttattcaac  
63661 accttctctc atagcatttc ctgaaacagt gtgtccagaa aaatgtattt tgtggacacc  
63721 gtcacgttca ggattgaata cacagtaaag tcaaaagtgt acataaacac taattcagac  
63781 aaatgggatt ataattgatta ttaattgctt gactatatta gaagaagtgt gtgtgaactg  
63841 ggggctgcag taccattgga aagacactag aggctccagt aagccaaagt cacactctca  
63901 cacagatgaa aaaattatc attctgtgcc aaagctaaaa aatgcacag aaacttaaaa  
63961 aagtattttt aagccatttt taatagttat cttgatacaa ccaggatttg gtccccattc  
64021 caaaattggt cccattccg tgaactgtgta aacagaccgt tgtttccaca atggcataat  
64081 taccaacaca aacacacaca aacataacct ttttttat tt tcttttgttt tccaaaagtt  
64141 ttgtcgattc tgtagtctct ggctcagttt tactgcagca accaaaccag ttcattgctg  
64201 aatgagaact gtctgacgct gtcagagtga gaactgtttt cctgaaacac ctcaattagc  
64261 atcaccttaa atttataaaa ttaaacatga agtcaggatg aaggggttaa actttttct  
64321 gtgtttcagt ttattcctca caaaatgtaa cacgacagta aaacaataat ttgatattgt  
64381 cattaacaca gaagtcaagt gacaaaaaga tttttatttg aagataatta tgccaagcca  
64441 aactgtaaaa aatgtgaaaa catagtttga gaaagagaat aaagaagaag tgcacagaaa  
64501 gcagatttcc atcagcatgt ctgagttcag gactgggagc actggtctct cctgagagtc  
64561 tctgagactg gagtctggga tcccctcttg gcctcacagg tcaccttctc ccactggtcg

64621 gcacagagcc tcaggggtgct gctccagctg tagaggccgt ccttctgcag caccocgggg  
64681 ctccctgctct cctccctgct gctgctgctg ctgccgacca ccttccagga cagagtcag  
64741 tctgagggga agcccttgtt ggccacacac atgagtgctg ccttccctg ctgcagctcc  
64801 tccatggagg gggccagcac tgtcagggg ggcggggcat cacctaggag acaccaatca  
64861 gcttagaggc tctgactggc tggagtgctt tcagttgtag gaagatttgt gttcaggtgt  
64921 ttttctgctc cattagtcac tgattcacac attgtttcac ttccttgaag aaatctctca  
64981 tgcagatcag caacaagaga aacttcagtt tctactgaaa aatgtccaac tgggttagag  
65041 aaggagcaga tgcacatcga tgtagaaaca agtttgact gaatgtcttt aaaaagcttc  
65101 atcaaactg aaataaatat actaattagg acaaaaacac acaaaaaata tcaggtttct  
65161 gtcagaaaa ccttgaata acaagtaaat gttctgaaat ataaaatgat caaaaatcaa  
65221 ttttctgagt aaaaactgcc aattaatgca ctatgaccgc attaataaa cattatttgc  
65281 aaaaaaaaa cactgttaat aggatattgt gttattaaa agtaatttga ctaaaaaaag  
65341 agtttaggtt tactcgataa aaaccaataa ccaaaaatct ttttaggta attttttaa  
65401 taattatttc atactggttc tccaccaaaa agttcaccac tttgacacaa actgactaat  
65461 gtgttttaca aaaacctctg actgaacaga gactctttcc agctgtatta acataaacta  
65521 aatatttcta atttcttgat tcacatagaa atgatgattt attctattct aaggcaacac  
65581 aatatttgat tttcaagtt tactgcagct aagctgctt ataaaaatg tattttatca  
65641 aaattatag aatttataa agaataatag taactcagaa tcaattaaa aaggaataa  
65701 gacatgaaaa cataaaaaatc agcaaaaaaga tctacttact tccaaactcc agtctggttc  
65761 ctccaccaaaa agtccaccac agtgatccaa actgatggaa gcgtcataca aaaacctctg  
65821 actgtacaga gacacgctct ctgactctga acaaaacgaa ctcaactgat gacagaaaac  
65881 atgaaaacat cacatcttag tcttagaaat ctaaagtctc tcagtaaaata aactccttta  
65941 atgatgttcc tactcaaaaa cttgtaaaata ttgtttcgtt aaaatataat gatgacacaa  
66001 acacagaaat cccccaaaa tgttcaaatg tctcttctga atccaaaaata aaagcagca  
66061 tgtaatgaat gagtttaaat gtggctgcag tttgtttgaa ccaacaactt atttaaaatg  
66121 ttgctctgca gaaacaacaa aaatcaacct ttaatcaaca gaagttctga cttcaatgca  
66181 ataaacagct gagtcagtc aatgaagtag aattatcttt ggagttcaat ctgtctttga  
66241 gcatttatga ttaaatgttt catattttca tataaaaaact cagtattgta aatctttaat  
66301 atcctgctgc tctttcatgt tcatctgtac atccagacag aagataaaaa cagttcttgt  
66361 tgcattaaa gataagtttc ctgttgaata aaggaaaatt taacattgac aagttttgaa  
66421 tatatagcag ttgacacct caacaatgga caacaataaa aaataacttg agatattgga  
66481 agttaacaca aatgtaaaat aattgaacag ttttatggtc atcaaaaaa cagactcaaa  
66541 gtggctcctt ttccagctaa taaaaactat tagaaattaa ataaaagtta ctatttcctt  
66601 aaaaaaatca tattgttaaa ttatcatgat gatgaagatg atccatgttc ctgttggagt  
66661 cagtggtttc catatagaca ctttgcatca gcagctccat gctccagtgc tctgggagac  
66721 tttatagtcc tgagagttga agactggatg actgacagct gtccttcatc acagcagaag  
66781 acacagaaat cctcctcctc cctcctcatc tctcctaaa catgagtgct atgtgcctcc  
66841 tcatctggac tctcctctgc tgctgcttta caggtaaaat ccagagaatc caactcctct  
66901 cctctatgaa catccgtccc tctgaaatga aggccacaaa agcatgaagc tgctttctgt  
66961 ttctgtctct gtctcctcag agtccagagg acaggtcaca gtgactcagc ctggagcagt  
67021 gagctctgct gtgggaggaa ctgtctccat ctcatgtagg accagtcagg atgtttatgt  
67081 tcaaacggc tatcaacgct tctcctggta ccaacagaaa gatggagaat ctctaaaact  
67141 actcatttac tgggctacct atcaagaatc agggattcca agtcgtttta caggcagtgg  
67201 atcaaaactc gatttcaact tgaccatcag tggaaattcag gctgaagatg cagcagttta  
67261 ttactgtcag agtgttcatg aaatcaacag tcaggctgtg ttcacacagt gaaaaacagt  
67321 cgtacaaaaa cctctttcag tcacagagaa cagaaaactga accaatacag ttcattgtag  
67381 acacacacac acacacacac acacctacac acacacacac acacgtgtgt gtttattttc  
67441 caaattattt tgttagaatt cttatttagt ttctaactt taagagaaaa taatacaatt  
67501 ctgactttgg attttaaaaca cataaaacaa taaaaacaga cgttggatat aaaatacata  
67561 aacagatat aagataaaaa aacagatcat ggctgaatag atttttttc tattatgtaa  
67621 aaatcatgtc aatagtacat ctgtcagctt agagtgtttc attcataatt tcatttttaa  
67681 tttactgaac atgataaaaag ttgttgattg aagtacagtt gtattcattt ttttatcctc  
67741 atcaccaaat catcagtttt cacagaatga tgacagaaaa actgtgaaga tttataaact  
67801 aaagagaaga acaactagaa aatccatgaa catgtttcca ctttgaacaa actttaaatg  
67861 tatttgcatt tgtgtgaaaa tgatcctctt tttctacaga cgttggctct ctttctgttt  
67921 ttgtctgaa atttgtctt tttcatattt tctgctttat cagcagaaat ctttctgact  
67981 gatttctggc atccagtcg ttgttcaaag acaaaactgtc tccatcagat gaaaagtacg  
68041 tcaaagtctt gctgcagctt caactgggat cttcagagac aaaagaagtt tttgttcaag  
68101 acaacagacc tgatgagcaa agaaacaatg gaggtgaaaa acagacagac agttatatac  
68161 atataactac ataaaaagtg ctttgatgtg agagtccaga tgaggacgca catcacactc  
68221 atgttttggg ggaagatgag gaggaag

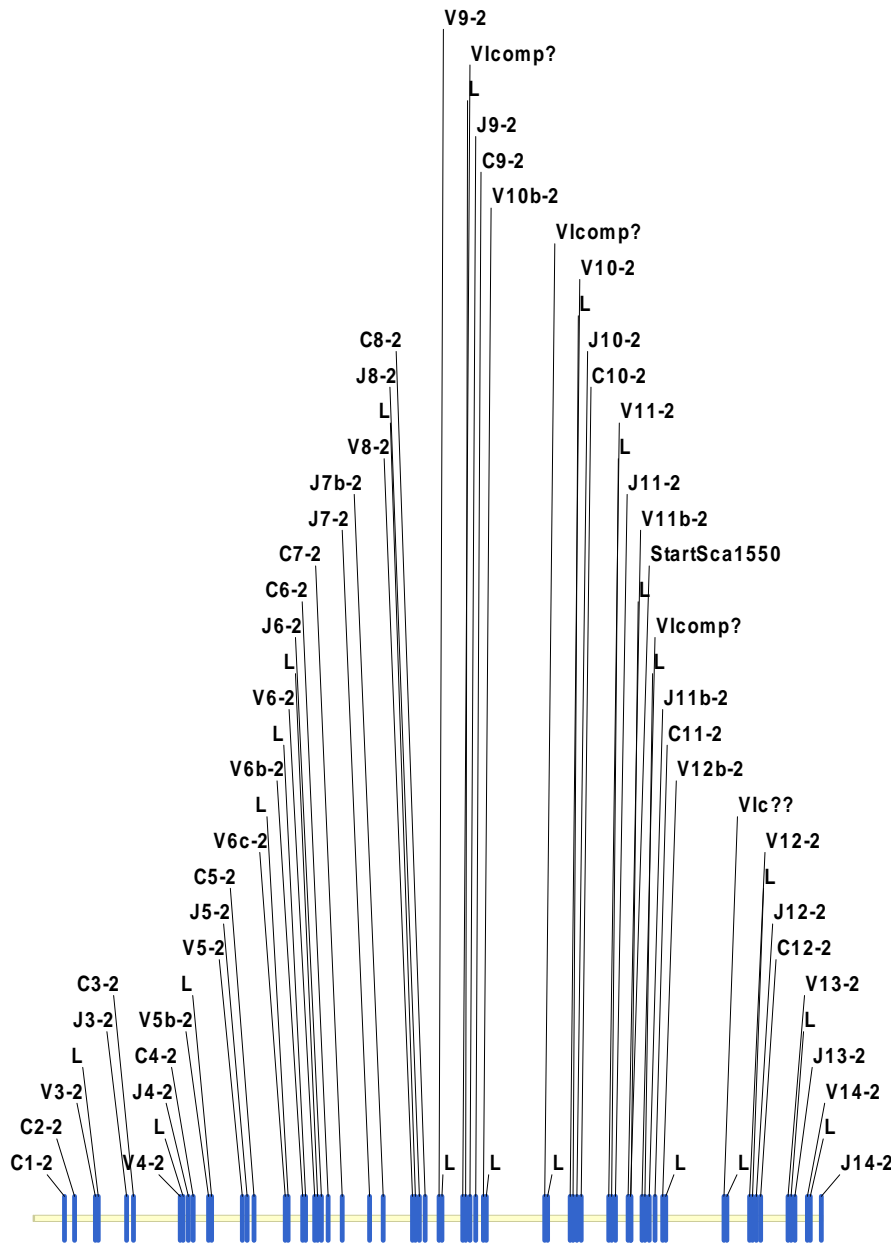

**IGL2**  
115004 bp

**LOCUS**            **IGL2**                            **115004 bp**    **DNA**            **linear**

DEFINITION Medaka Immunoglobulin light chain locus 2.  
SOURCE Oryzias latipes (Japanese medaka)  
ORGANISM Oryzias latipes  
Eukaryota;Metazoa;Chordata;Craniata;Vertebrata;  
Euteleostomi;Actinopterygii;Neopterygii;Teleostei;Euteleostei;  
Neoteleostei;Acanthomorpha;Acanthopterygii;Percomorpha;  
Atherinomorpha;Beloniformes; Adrianichthyidae; Oryziinae;  
Oryzias.

| FEATURES     | Location/Qualifiers                                                 |
|--------------|---------------------------------------------------------------------|
| source       | 1..115004<br>/organism="Oryzias latipes"<br>/mol_type="genomic DNA" |
| C_region     | 4408..4664<br>/product="C1-2"                                       |
| C_region     | 5890..6206<br>/product="C2-2"                                       |
| V_segment    | complement(8891..9193)<br>/product="V3-2"                           |
| misc_feature | complement(9308..9359)<br>/note="Region: Leader"                    |
| J_segment    | 13476..13513<br>/product="J3-2"                                     |
| C_region     | 14459..14775<br>/product="C3-2"                                     |
| V_segment    | complement(21253..21552)<br>/product="V4-2"                         |
| misc_feature | complement(21665..21718)<br>/note="Region: Leader"                  |
| J_segment    | 22419..22456<br>/product="J4-2"                                     |
| C_region     | 23137..23450<br>/product="C4-2"                                     |
| V_segment    | complement(25405..25704)<br>/product="V5b-2"                        |
| misc_feature | complement(25819..25870)<br>/note="Region: Leader"                  |
| V_segment    | complement(30342..30677)<br>/product="V5-2"                         |
| J_segment    | 31062..31099<br>/product="J5-2"                                     |
| C_region     | 32036..32352<br>/product="C5-2"                                     |
| V_segment    | complement(36605..36904)<br>/product="V6c-2"                        |
| misc_feature | complement(37019..37070)<br>/note="Region: Leader"                  |
| V_segment    | complement(39137..39433)<br>/product="V6b-2"                        |
| misc_feature | complement(39548..39599)<br>/note="Region: Leader"                  |
| V_segment    | complement(40842..41177)<br>/product="V6-2"                         |
| misc_feature | complement(41277..41325)<br>/note="Region: Leader"                  |
| J_segment    | 41833..41870<br>/product="J6-2"                                     |
| C_region     | 42810..43126                                                        |

|              |                                                                                         |
|--------------|-----------------------------------------------------------------------------------------|
| C_region     | /product="C6-2"<br>44895..45211                                                         |
| J_segment    | /product="C7-2"<br>48901..48938                                                         |
| J_segment    | /product="J7-2"<br>50885..50922                                                         |
| V_segment    | /product="J7b-2"<br>complement(55154..55489)                                            |
| misc_feature | /product="V8-2"<br>complement(55590..55638)                                             |
| J_segment    | /note="Region: Leader"<br>56139..56176                                                  |
| C_region     | /product="J8-2"<br>56963..57276                                                         |
| V_segment    | /product="C8-2"<br>complement(59046..59345)                                             |
| misc_feature | /product="V9-2"<br>complement(59460..59511)                                             |
| V_segment    | /note="Region: Leader"<br>complement(62495..62801)                                      |
| misc_feature | /product="VLcomp?"<br>/note="The sequence is not complete"<br>complement(62901..62949)  |
| J_segment    | /note="Region: Leader"<br>63554..63591                                                  |
| C_region     | /product="J9-2"<br>64363..64679                                                         |
| V_segment    | /product="C9-2"<br>complement(65507..65806)                                             |
| misc_feature | /product="V10b-2"<br>complement(65921..65972)                                           |
| V_segment    | /note="Region: Leader"<br>complement(74437..74707)                                      |
| misc_feature | /product="VLcomp?"<br>/note="The sequence is not complete"<br>complement(74822..74873)  |
| V_segment    | /note="Region: Leader"<br>complement(78167..78502)                                      |
| misc_feature | /product="V10-2"<br>complement(78602..78650)                                            |
| J_segment    | /note="Region: Leader"<br>79161..79198                                                  |
| C_region     | /product="J10-2"<br>79745..80061                                                        |
| V_segment    | /product="C10-2"<br>complement(83751..84122)                                            |
| misc_feature | /product="V11-2"<br>complement(84222..84270)                                            |
| J_segment    | /note="Region: Leader"<br>84782..84819                                                  |
| V_segment    | /product="J11-2"<br>complement(86618..86917)                                            |
| misc_feature | /product="V11b-2"<br>86928                                                              |
| misc_feature | /note= Scaffold 1550 starts<br>complement(87032..87083)                                 |
| V_segment    | /note="Region: Leader"<br>complement(88654..88958)                                      |
| misc_feature | /product="VLcomp?"<br>/note="The sequence is not complete."<br>complement(89060..89108) |

```

J_segment      /note="Region: Leader"
                89713..89750
                /product="J11b-2"
misc_feature   90522..90838
                /note="Region: C11-2"
V_segment      complement(91666..91965)
                /product="V12b-2"
misc_feature   complement(92080..92131)
                /note="Region: Leader"
V_segment      complement(100596..100866)
                /product="VLcomp?"
                /note="The sequence is not complete"
misc_feature   complement(100981..101032)
                /note="Region: Leader"
V_segment      complement(104326..104661)
                /product="V12-2"
misc_feature   complement(104761..104809)
                /note="Region: Leader"
J_segment      105320..105357
                /product="J12-2"
C_region       105904..106220
                /product="C12-2"
V_segment      complement(109910..110281)
                /product="V13-2"
misc_feature   complement(110381..110429)
                /note="Region: Leader"
J_segment      110941..110978
                /product="J13-2"
V_segment      complement(112777..113076)
                /product="V14-2"
misc_feature   complement(113191..113242)
                /note="Region: Leader"
J_segment      114782..114818
                /product="J14-2"

```

BASE COUNT 32768 a 21233 c 22504 g 33749 t 4750 others

ORIGIN

```

1 aaaagaaacg gcttctagcc tgttccatag caacgggtgcc ccggttcatt agttactgtt
61 tgcgtccgga cgggacataa cagcgggttc cgactacggt ctgaagcctg agggtgaaag
121 gtaacacgct gacagcaaaa tcagcgcctca aaaagcacct taataagtca tgtgatctca
181 gttggtagtg tcoctgagttg acgtcactga cgtacgactc gcatttactg gggaatatcc
241 gatgtgtctg cttacatggc acacgcaaat gcacgtatcc gattagtttc tgattttattt
301 ccacatatga gtgaggcctg tatccgatct gagaaaaacg gaatccattc gcttttgtcc
361 tgcttacaca ttcaccgatc atttccgatc tgtgccacat gagaggaaaa aaatcggaat
421 tgggtcactt gaaccatgca gtgttaaggt ggccccatgat agcacaaggg ttctaacagg
481 aactttctgct gttaatccaa gttttcatga aagtagattt gtagcagctg aatcaaaaatc
541 taataaatc aaataaaaatc aaaaagtaat acaaaaatgt ttctcaagaa gaaatgtcaa
601 gcatttgtgg ttcgacggaa cagatttggt tttgacttac tggtcacca acagggaggt
661 ctttgaaaaa tgttaaatga ttccctgttg acattttattc ctgaaaatac ggatgaaggt
721 cacagcatca ctgaagcatt acatcaactt aaaaagggtc agcaggcaat tcaggacaaa
781 agaaaagttt cctggtgcca acttttgcca aaaatagtga cacctgtcct tgtggtcctg
841 attataagtt gtgtgtttac tatgtgcatc ataccatgta ttcaatctat gatattcagc
901 agtgaatggt ggagaacaaa gtgttcttct cagtcaaaaat aataacttgt tattgaaagg
961 agaagaagat gactgtgatg atttgaaact ataattacta tgtaaaaaaa aaaaacatct
1021 gagtgtaaat tgataaatgt gttatgaaaa taaagatgtc acagaaaact gagaagagat
1081 gtgatatggt atgtgagatt ttaataatca gtgataaaca ggagggaatg atgtgaaaga
1141 acttttttgt aatcattatt gtttaaatat cacctcaaac tggccttttt acctcttag
1201 aaacagttct gtgtttttca tctgcttctt agaccagctc aggatgaggg gggttttcaac
1261 acacactttt cttagctgac aagaaaaagga tgccgtttga aatggaaacc ctcccaaatg
1321 gttcattata tgacacacac cccaatgaac ttttcagctt gtatctctgc ttgaaaattg
1381 taacctccta cttctatttt caacgaaatc agcttgagtg gaaatagagc atgatagaga
1441 cctccgtcac acttgttttt tctcccttgt gcataagaaa ttgacttttt tctgtgattt
1501 gttatttctt actgtttttc ttcattgtct agatgcattt atctgacaag acccaaatca
1561 gaaccagtaa tatattaaga caaaagagac tttttatcat aaattatttt aataactcga

```

1621 caaatcatga gaaaatacag aaataatggt ccaaataattt gttcccttt ctagatgcaa  
1681 cttttcagta gacttttggg aagctggttg ttatttgcta cagacaaaac ctgagctcga  
1741 actgctgttg gttttcatgc cattttattc agtttctgt ttatctgagt caatttaact  
1801 gatattttaa tgtgatgaag ttgttgacag atgacaactt catttctctg aacaattcac  
1861 cataaactaa aatacaactt tcattttaagc actattttgt taaagtacac aaaaagaaat  
1921 aaaaaagaaa acatttttgt agttacataa ctaaacagtt aaatcaatgc acagctcaga  
1981 aacagaaaaga ttcagaatgt tatgcatttc tcacagatcc agtttttgat ggttgatag  
2041 tgcagttgtg tccatttccc ttcagatattt aaggacactg catggtagtt gtagtttggg  
2101 tcttttgaag tctctctatc cctgaacctg taataaaaaa ttctgtttac ctctggtcta  
2161 aattcagttc ataaactggg ctgaattatg atgttataaa cattttctgt attttttaa  
2221 ggatttcaca cttttacaat caggctcagt cataaagaat gaatttagta acgttataat  
2281 tgaacaaaag tcttacgttt ctgtcagtg tgatccatcc acccatttcc attcatattt  
2341 ctgtttctgt gatgaccatt caatagacag accgatccag gattctgcat tctgattcaa  
2401 tttagaaaca aactcctgga aacaaaagaa aatggttcta atacatttct actgaatctc  
2461 agtttagcct atttggaatt gaagacataa atgggaaaaa gagtttcttt gttccatcac  
2521 aacatttctt tgaaattttg ctgaaagaca aacatgaaat ctgagttgtt gaggagaaat  
2581 ttcagctgga atccatcagc atccagacaa cagcagcaca catabaggtg gagaatcaa  
2641 gcacacaagaa gctggaagga actagagtga acacaccac ctgttctctc ttgctgtta  
2701 ccaccaccag atcagatcct gcaaaactgac agaaaactcct gctgtctatc caagttctat  
2761 tcttagtgga tttatagtag cagctgcttc caaatctcat ccatccttca ggacaccttt  
2821 tacctttata ggagtgattt acaaaaatgc atgttattat aaaaacttcc aagttcagtt  
2881 caaaggtaaa catgatccaa acaaaactgat ataatccatt agtttttagtc ttttctcacc  
2941 ttcaatctta tttttcagct gttttatttc atcccaaaga gttttgtga tgcctgaaag  
3001 acagtagaag tccatttctt attgatttgt acttaaatga acaatcacat ggccttcaac  
3061 agataccaag cattcttcac tttagtgggg ggggttggtc atgatgcaga ggtggagcag  
3121 tttaggcagg tttgattccc aatctgctg cecatgtgtt caagtgcctt ttggcaaaac  
3181 actgtgctc atgttttgc gtcacggtga agaggacctg cctgcagaca tcaacgtcca  
3241 gaaccagaag tcttgacct gaactggaat tacccccaca tcaactccaaa caacttgatt  
3301 ggaactggta accataacag tttttatttt accattttaa actttactta aagtttttcc  
3361 tacactttg aacacttttt ggttacctgc agggtaagtt gtataatttc tgcctctga  
3421 aatgatgtga cgaatcagac aactgtgtt gtgaatttgg gctacacaaa taaaattgaa  
3481 ttgaaccatc ttgtctgcag gttcctcttt ccatgggtgc atgatagtgt gtgtaaatgg  
3541 atgaaaggag tnnnnnnnnn nnnnnnnnnn nnnnnnnnnn nnnnnnnnnn nnnnnnnnnn  
3601 nnnnnnnnnn nnnnnnnnnn nnnnnnnnnn nnnnnnnnnn nnnnnnnnnn nnaagggtgaa  
3661 tttataatth accaacattt ttatattcag ttataacata tgaaccaata atttttggtt  
3721 atttttataa ttttgtgttg agaagaaaat gaaacctcct tgtttttaa ttgtaataat  
3781 tctcgaaact aattgatttt ttgtaatttt ataaaagttt tgcgagaata atataactt  
3841 tttttaaagg aaagcctgaa aatataattg tgtgaatttt ttaacatctc aaaactactca  
3901 taggtcagta ttgtgaagta attataaaaa ataaagtaaa caagacatat caacgtcaaa  
3961 ttgttaatth tattctcatt ctcttgctcag aatctgtgaa ctctgttaga tatctttaa  
4021 ctttaatcat ctgctcaagc aaatgtttgt ccatagttta agaacaatcc ttttaagaaaa  
4081 tgattctgat tattattcac ataaaaaac aaggaatgtg aaaaacgtaa tgcctttttt  
4141 ctttgtcagg tttttgtaag ttaagtgaag ttagtthata tcttaaaagt cattttctta  
4201 ttttcagttg agagtgaac cggtttgttg atgtggttca ctgggtgagc ctactctctg  
4261 ccatggttac agcacctaaa gaaggaagtg aaagattgaa aaaaagtgtg aaactaactg  
4321 aagaaataaa gcagcatttt gctgcaggaa gagtttctgt tctctttgga tgatttctca  
4381 tgaacttgtt tgtgtctcct catgacgtgg gtcatgttcc cccaagctg acagtgctgt  
4441 cccctccat gcatgagggg aaggccacac tctgtgtct ggccaacaat ggcttccctt  
4501 caggctggac tctgtcctgg aaggtggcg gcagcagcat cagcagctgg tgggaggaga  
4561 gcaggagccc cggggtgctg cagaaggacg gcctctacag ctggagcagc accctgaggc  
4621 tccctgcaga ccagtgggag aagctggact ctgtgacctg tgagnnnnnn nnnnnnnnnn  
4681 nnnnnnnnnn nnnnnnnnnn nnnnnnnnnn nnnnnnnnnn nnnnnnnnnn nnnnnnnnnn  
4741 nnnnnnnnnn nnnnnnnnnn nnnnnnnnnn nnnnnnnnnn nnnnnnnnnn nnnnnnnnnn  
4801 nnnnnnnnnn nnnnnnnnnn nnnnnnnnnn nnnnnnnnnn nnnnnnnnnn nnnnnnnnnn  
4861 nnnnnnnnnn nnnnnnnnnn nnnnnnnnnn nnnnnnnnnn nnnnnnnnnn nnnnnnnnnn  
4921 nnnnnnnnnn nnnnnnnnnn nnnnnnnnnn nnnnnnnnnn nnnnnnnnnn nnnnnnnnnn  
4981 nnnnnnnnnn nnnnnnnnnn nnnnnnnnnn nnnnnnnnnn nnnnnnnnnn nnnnnnnnaaa  
5041 aaattaaata aaaagttttt atctcatgag tttaggagat aaaaactcgt aaatttatga  
5101 gaaaaaaact cgtaaatttg cgataataag tggaggtgag catgcagagc agcaggtgaa  
5161 cgccgcgcag caacagagca gaccgactaa actcagttga acaggtgagc tgaatgagct  
5221 tgaacgttcc aaatatctgg aagctcattt gtttgattta caatttatcc aagttttatt  
5281 tattgatggg ttggtttgcag gatccctgca gcccatgaag ccatcgggtg ccctgcagct  
5341 gtccacttca atcctttctt cctccagatc tctacgtttg tgtgatgctt ccgtctgagg  
5401 aggacactt ttttggcatt ttcaacttcc taatgctaatt ataatagact attttcttcc  
5461 atctttgttg tttgatgata taacgggagc tttacttccg cattggtgtt cggatctgat  
5521 gacaggttcc tgacgtaagg tgacagatga acttgagggt ttgtgaatga aaaggagaat  
5581 aaaagctgca gcgttctct acacccaaac gtgtctctga gtccttatt ttacagagga  
5641 aactccgctt tactgacact gaatcccgga aagccgctcc tactgacgat aatctgattt



5701 gagtcgccaa aggttcagaa tctctttgtt ttnnnnnnnn ncccatgggt acagcaccta  
5761 aagaaggaag tgaagattg aaaaaaagtg tgaactaac tgaagaaata aagcagcatt  
5821 ttctgtcagg aagagtttct gttctctttg gatgatttct catgaactgt tttgtgtctc  
5881 ctcatgtggt gggcatgtg cccccaagc tgacagtgtc gtccccctcc atgcataagg  
5941 ggaagggcac actcctgtgt ctggccaaca atggcttccc ttcaggctgg actcctgtct  
6001 ggaaggtggg cggcagcagc atcagcagct ggtgggagga gagcaggagc cccggggtgc  
6061 tgcagaagga cggcctctac agctggagca gcaccctgag gctccctgca gaccagtggg  
6121 agaagctgga ctctgtgacc tgtgaggcca cccaggactc ccagactcca gtcacagaga  
6181 ctctgtggag aaaccagtgt tcttagtcac cacctgactg actggaacaa tattattgtg  
6241 tttttgcttt tactaagatt tcagctgcat tgatttttta atcttctttc tttgtgtgct  
6301 ataaaaacat ttttattaga tgttactctt tttataacttt ctgcaaatata aaaattactc  
6361 tttaaaattg tttcgtttgt aatttcttac aaacatactt tttattaataa aatatacatt  
6421 aattaaatgg taaaataaat tttgtgggca ccagtctcta ccaggggtca ccaacgcagt  
6481 ctccatggtc gtccatgaga gcaacttaaa gggccagcaa ggcattgctc aaaaatttca  
6541 cagatcatga ggggaattcaa tattacgact aagtattaga ggcacaaaa aaaaaaaaaa  
6601 tttaatnnnn nnnnnnactc gtaaatttgc gataataagt ggaagtgagc atgcagagca  
6661 gcaggtgaac gctgcgagc aacagagcag acgactaac tcagttgaac aggtgagctg  
6721 aatgagcttg aacgttccaa atattctgaa gctcatttgt ttgatttaca atttattcaa  
6781 gttttattta ttgatggttg gtttgcagga tccctgcagc ccatgaagcc atcgggtgtc  
6841 ctgcagcttt ccacttcaat ctttcttccc tccagatctc tacgtttgtg tgacgcttcc  
6901 gtctgaggag gagcactttt ttggcatttt caacgttcta atgctaatat aatagactat  
6961 tttcattcat ctttgttgtt tgatgatata acgggagctt tacttccgca ttggtgttcg  
7021 gatctgatga caggttctct acgtaaggtg acagatgaac ttcagggttt gtgaatgaaa  
7081 aggagaataa aagctgcagc gttcctctac acccaaacgt gtctctgagc tccttatttt  
7141 tcatatgaaa cttcgtttta ctgacactga atccccgaaa gccgcctcgc ctgacaataa  
7201 tctgattttg agtcgcaaaa ggttcagaat ctctttgttt taaacctata ataatccgga  
7261 aataaagctt cacaaaaagc tccacatctt tcatcttcaa ccgatgctcc gataaatgga  
7321 caacttcggt gttttctcct tgttaatcta tgactttttt ctcaaaaaat cgtaaattta  
7381 cgagttttca tctcctaaat ttatgagata aaaactcgta attttacttt tttttttttt  
7441 ttgggggccc caaaaaactc gtcgaaaaat atatttgaaa aattttaaaa nnnnnnnnnn  
7501 caccgtcttt gttttaacat gcatcaaatg tgtagcttca ggattctcct aaagtgtttt  
7561 cccctgaagc tcccaccgcc tgtggttagga gtttctgtca aatacttttc ttgacttcat  
7621 caccaaggac gcggatgatg agagatcagg ttcatttatt ttgaagactt ctacaactgc  
7681 atcaatgaga agcacacgtc tccatgtgtg ggttcatgaa accattcagt gaggagcagc  
7741 aggtgggccc aactatggcg ggaaaaagt gctgctcctc tgtaaccagt gggaggggct  
7801 tcatagcagc aggggacgca gtgaaagaat ggaaagtagg acattctgac atcacctgat  
7861 tctcttacct ttttaataa tatattttta agatgcaacg tcttttttcc ttgggagacta  
7921 ttttactaa gtctgtgaaa aaatcccaga aatcaactga agcttctgtt agactgcac  
7981 atctttacat aaagagaaa cgggttagat ctctatgtag gcctcccaca tatatagtaa  
8041 atgaacagac aaatgacata aattattgat gaaactaaca ctatttagct gaaaatgttg  
8101 cacaaaatgt tacattttca ttcattaagc tttcaaaaa ctccaaaact tgttctgaca  
8161 aaaagattga tgatttctt ggcttcaaaa atggtgatct attgaaccac caatacaact  
8221 agtgtccctc ctgactttct aatgttttag cagataaaca gaaataaatc aatgtttcat  
8281 gtttatacat attttcttg tcatattttt tgtgtaaatc attgattaga atgtgggga  
8341 aaaaatacta ttgatattgt agcaatcaat tcataactac tgctaattat tattctcatt  
8401 actattacta tactagtctg tggtttagtt ttttggtgaa tttgcagtaa acaggtcctg  
8461 agtagccctt aatagcactc agaccataa aatagctcct atcctgaata aggttagtga  
8521 tctgatctta aacagtatta aatataattt cctgtttttt aatgataaat taatgcagac  
8581 actttgatgg aatgtaaaat agtgaatgta cagttttag atcgtgtgaa atgtctgtct  
8641 cctaaaaaac atacaaacat aaatgtctta gactctagta tcaaagtga aaacatccaa  
8701 aggtggaaaa aatatctaaa attttcttag ctgagcattt ttttcttct ctggtagatt  
8761 cattgatggt agaagatcta agaatttatg gtaaaatcca catttgaacc aaaaggttga  
8821 gagcagctgt tcattcagat cagttcctct ttagctgaaa gaggtttttg tacgacgttg  
8881 tttcactgtg tgaacggata gctgtaatca tgctgacagt aataaactcc tgaatcttca  
8941 gcctgaactc tactgatggt cagagtgaaa tcaactgccag atccacttcc acgaaaacga  
9001 tcagaaactc cagactgacg ggttacagca tcatatatca ggagtttagg agattctcca  
9061 gatttctgaa gataccattg aagatagttg ttactaacat atgaactggt ttgacatcta  
9121 atggagaaaag tttctcctgg aacaacagac tgagatccag gagtctgagt cacagtgatt  
9181 tcacctgatg aacctggaaa aaaggaaaaa cagaagagtc attgagatga atccagatga  
9241 aagaaatcta agaattgtga tgaagtttgt ttctctgatga atccaagtt ccagcagaga  
9301 gtctcaccct gaacaaggag ctccaggaca gccagcagca gagtcagtga catcctcatt  
9361 gtgctgcagg tgtgtcagtg tctctgaaag gtctggacag ccaactgatca acaactgact  
9421 cttactgtct ggaagcagag aggcagcaca catatgcaaa cacactgagt cagtcatctg  
9481 cagctgttct cagcagctct ggatgttcag cttggaatct ttggcctaca ggagctgag  
9541 cagcacaact ctggaataaa gactccacac tcagtcactt ctgatcacag attacaataa  
9601 ttatttttaa tgaattgttg ataggttggg cggtttaata ggtagtttgt cctctccagg  
9661 cggaggactt taagtatctt ggggttttgt tcatgatagc aggaaaatca gagatattaa  
9721 aggttgatt tttagcggct ctgctgttat gctgttgttg tgttgcctca ttttgggtgaa

9781 gagagatctg agtcagaaag caacgctctc aatcttctgg ttaatcttag ttccaatatt  
9841 cacctatggt catgaactca gggctcatgac ctaaagaaca aagtctttaa tacaagcggc  
9901 tgataggggc ttctcctgca gggcggctag tgctcccttt aaaaaaaaaa gagtgaaaac  
9961 atagaatttg gcaatggaat tctcatacaa tggctatccc caggccaga atccgatcc  
10021 actatacatg cgtgatgtat ttatcttaaa atattaccag ttttaaatg tagggagccg  
10081 gtttagctcg tgctggtttg cggcgccttc cgtccgtgaa accaggggtc gaatccgggc  
10141 tgctccctgt tcccttctct acctctatgc cggctccaag cccgggtgct ttgagaggat  
10201 tgcgctcagga agggcatccg gcgtaaaaca cattgccaaag tttaccatgc gactcgttcg  
10261 ctgtggcgac ccctgatggg aaaagccgaa agagaaacaa caacaaccag ttttaaatg  
10321 taattaaccc ttgtgttatc ctaggcactt taacattgga aatggggctga tctagacca  
10381 ctagacagtg ctctgaactt tttcttgaa tgatttatga tcttcaactg tgcacatgga  
10441 ttacatgaaa tctttccacc tttatccacc tttgtcatgg tagagataac acgttaatgt  
10501 aagggtgggg tcgtaggata gcacaagggt taaccctcct gttatgttcg tttgtgagga  
10561 acagagatga tggctcctgg tcaatttgac ccagtgcata ttttattaat tgaaaaatgt  
10621 ctgaaaccca gaaaatccta acaagcaatg tgaatatttc atcactaact cattaacaa  
10681 ttattctttc aaaaacttag tgaaatgggt ttctttacct ctaacgggaa gtggttcaat  
10741 tattagataa ttcactcgtt tttcttaaaa atataatgt tcaaactttt tcaaaatctt  
10801 tcaactatg attacttttg aaagactacc atataaaaata caatagttt acataacatt  
10861 gaaacataat cttgaaatct tcttttacct acatgcaact tgaaccagaa aaaaacaaaa  
10921 tcacaaaaaca acagacaagc aattgcaata tgaactgtg tgtgtgctg tacatataca  
10981 cagcacaaga gtgatcagtc atcacactgt gctaattaat tttgcacatt tcacacaggt  
11041 catgcttgtc ttgacctaga tccctgtctc ggctcgactc gggcccccg cctgccccctc  
11101 aactccactc ggtatgaagc cgtctgctgg acttttaata tggtagctta gaggtagata  
11161 agttaactct tctctatgag tctcgtgtaa ttgcctgtcc gtccttggg aggcacctc  
11221 cttcatgtgg gcacccctga ggtttcttag tttgtttcca gaactgttt ttttttatt  
11281 aggagttttt tcttaccgcg aagaagagtc taagggcagg gattaccgtt tagtttagtc  
11341 ggttttagtta gttcaattta gtatcttctc tttgaattct atgtattcat gatccctctg  
11401 attttatggt taactttttc aatctctgat atgaagccca tcgagacgac tgttgtgtg  
11461 aatgtgggct ttacaaataa aattgaaatg aattgaaatg acatgggtccc atgagtcact  
11521 gccactctag tgggccctgg aactgtcttt attatgtttt ctgcagacag gtttctgta  
11581 cgcataattg gggatgaaga ccaatgtatt tcaccattct ttgacatgaa tgtctgtctt  
11641 ggaggaacag gaataacaat tcttctatct ggttcaaaat caaaatcatt acaatcagaa  
11701 tttagcttca gatagtcctc ttctgatcat gatcagtgat gacttccaga atctcctgga  
11761 ctgtcatcgt tctgcttctg ctgctaaatt tctaaaggtc tgcctgaaag agtgtaatgt  
11821 tggaggact cccatgcaga gaactcttta tatgttttgc ccctccccctg ttgagtgctc  
11881 acagaatgtg ggttgagttt tcccagagag acataaatgg ttccttaaaag tcataacacc  
11941 tatgtgtgtg tgtgtgtgtg tgtgtgtgtg tgtgtgtgtg tgtgtgtgtg cgtgtgtgtt  
12001 tatgtgtgtg attggggtga aatatttctc agagctgcaa agaaagcaat actacttata  
12061 ataagacatc cttgaacctc cagtttgact gccgggtcaa attgacctga acagtatcta  
12121 tgtgatataa acatgcaggg ggggttgcaa atatgtgaga tgaaccaaata tcataatata  
12181 tgttgattac actaatataa gcaagcaaaa gaagtttcat gctggaaaaa tacttttaac  
12241 tatttttctc agatgttcaa actttataag ggggtcaattt gaccgcgaac ataacaggag  
12301 ggttaagaga gagatgtgag ttgcagctc ccaaactgta aaagcactcc ctgtcaggaa  
12361 ctgctggtgg aggaccataa atgcagaga ccaggattgg tgacaggaaa taaaacttt  
12421 aattagcaaa ttgaaacatg acaaaactat gaggggaaac aaaactgtga caaaactag  
12481 gagatgacct gacaaggaag aacagaaacc aagacactta aataggctga ggttaattaa  
12541 ctgaaactgaa gacagctgtg gatcatgaac ctgaaggtgg agtgactgac aaagaaaacc  
12601 aaaaacctga ccaagaacaa aaccacaaaa tctttacct gcctagttaa gcgttagaaa  
12661 ataaatacaa ttgaccctaa gatgcaaaa agacggctca gacatacct taataataat  
12721 acaataaat gattggattt atctgcgtt ttccagacgc tcaaagcgcg tacattatgt  
12781 ccatttttca ttctctttc attcattctt agtgatggtg gaggcgtggc tgcagttcg  
12841 agcctacggc cctctgaca gtcaccagga tcattcatgc acattcatgc tggtagccag  
12901 tagcgtaag ggtcttgccc aaaggccctc actgggtgat gttaatgtt caccattgat  
12961 acagtaattg cccattgtt cattcctatc aaaccctgga tccctgtggt agtctctcac  
13021 caccaaccga gctaccagc cgcttttagc tgggttatgat taggatgaa taactgacaa  
13081 tactgtattg gactgataat ggagccaaga tcagtttcaa agcaaaatgg gtctatttt  
13141 gctatcctat tttagagaaa catcctcctg agtaaacatt ggaaagatag tttctattta  
13201 tagtttctat attttacttt tatatactta gtacttttat atagaaacat tttaccactg  
13261 ctccaaaata aagtactttt tgatcttcag aacaaaaact ctgattaaat ttcagctaaa  
13321 taattatgac acttgttcat gtctgtaatg agatttaata tcagttgtgt tttccagtca  
13381 gactgtgttg agtttgtgtt gttcaaagtc agagagcgtg tctctctgca gtcagagggt  
13441 tttgtacgac gactcagtta gtttgtatca ctgtgggtgga cttttgggtg aggaaccaga  
13501 ctggagggtg attgtaagta atttttttc aatttacctc catgttttaa caaaactgtg  
13561 tttcttttaa gtaccataaa ctaacatttg tctactttta tgattttat agatttagtt  
13621 ttttcatata atgcaggaaa cattcacaga tgcaaaataa cgtgattcca tttgaaaatc  
13681 atttgtcagt aatctgtctg taaaggtaaa tttatagttt tccaacattt ttatattcag  
13741 ttataacata tgaacaagta atttttggtt atttttacaa ttttgtgtg agaagaaaat  
13801 gaaacctccg tttttttgaa gttgtaataa tcttggaaac taattgattt tttgtaattt

13861 tataaagttt ttcgagaata aattatagct ttttttaaag gaaagtctga aaatataatt  
13921 gtgtgaattt ttttaacatct caaaataact atagggtgagt attgtgaaagt aattataaaa  
13981 attaaagtaa acaagacgtt tcatcgtcaa attgttgctt ttattctcgt ctcatgtcag  
14041 aatctgtgaa ctctgttaaa ttttttaaac cttaataaat ctgctcaagc aaatgatgtg  
14101 ccatattttta agaataatct ttttaagaaaa tgattctgtt tattattcac ttaaaaaaac  
14161 acggaatgtg aaaaacgtaa atgtcttttt tctttgtcag gtttttaaaa gttaaatgaa  
14221 gtaagtttat atctcaaaga tctttttctt attttaaat aagaatgaaa cctgtttgtt  
14281 gatgtggttc attggtgaa gctcatctgtt tccatggtta cagcacctaa agaaggaagt  
14341 gaaacattga aaaaaagtgt taaactaact gaagaaataa agcagcattt tgctgcagga  
14401 agagtttctg ttctctttgg atgatttctc atgaacttgt ttgtgtctcc tcatgcagtg  
14461 ggtcatgttc cccccaagct gacagtgtcg tcccctcca tgcattgagcc gaaggccaca  
14521 ctctgtgtc tggccaacaa tggcttcctc tcaggctgga ctctgtctcg gaaggtgggc  
14581 ggcagcagca gcagcagcag ctgggaggag agcaggagcc ccggggtgct gcagaaggac  
14641 ggcctctaca gctggagcag caccctgagg ctccctgcag accagtgagg gaagctggac  
14701 tctgtgacct gtgaggccac ccaggactcc cagactccag tcccagagac tctgtggaga  
14761 aaccagtggt cctagtcacc acctgactga ctgggattct tttactttgt tttaaactac  
14821 tctgacttca ctttgtaatc tttgtggcat ttattttcat catcattctg aatgttctga  
14881 atgcttcttt ttttaataaa agatttttta ttcaacttaa ctttggtttg tttagttttt  
14941 ttacatttaa tgacacgttt ttgttcaaca aatttaaaat aatgaaaatt ttttttaaac  
15001 attttttaaa acctttttaa aataaaaaaa atttatttta aaatgtatag tataatctaa  
15061 gtatagtata tagtatagta tagtatgtt atagcagctc tacactcaa caacagcatc  
15121 actgaggta ttttgtgctg gtgattttgt aaaccaaaagt ccatagaaaa tgggttttac  
15181 taaacgtatc agtttaaac ttttctcata aaaatttttg tcagcacaat gtttagtattt  
15241 ttagctttta aaattacttt gaacaatagt ttaatgatca ttagagaaat aaaatgggtg  
15301 taaaagttta gcaaacctga catttttttc atttaaaatg taaaatgat ttaattttg  
15361 aatgggtttac tatcaatgat aaatttaggg agttttattc tgctctatac atctctgaat  
15421 gtcttcctga tgagaaactg taaaaaactc tcttttcaca tcttaatatt ccgacagtgt  
15481 aaccagatgt agctgctcta ttgagaggaa acgatacata actcctgatc tggctgcaaa  
15541 ttttatcaat attttacatc aaactcccgc tcacatttta ccggcatcat gtgattttat  
15601 ggttgaacat ttttaaccca aactacagtc agccgttgat gctgtagctc cacttaaac  
15661 taaaactttg agaactaaag ctacagacc caggaggaac gaacctatca gagccatgaa  
15721 acggaatgc aggagagcgg agaggaagtg gagaaaaaca aaattaactg tacatcacga  
15781 cattttttaa gaacagcaaa tgatgtacag tcatgcaata aaacaagcaa gaacctcca  
15841 cttctcatatc ttaattttac aaaacaaaaa tgaccctcaa gttctgtttg aaacaataga  
15901 cagttagacc aaaagagact ttcaaaggtc ctccagcagc ctccagatgct gtatgtgaga  
15961 gttttgtctg ccactgcagg agtacaatca atgctattag atttagctc ttaactcaa  
16021 aatgtgttga ttttaatgaa tctatagatc tgcatttatc agaggaaaca ctggaagtgt  
16081 ttgtcctggt tgatgctgtg gcacttggtg aggttttctc ccagttaaag cctaccact  
16141 gccttttaga ccctatcccc acatcgttgt tgaaatcatt ttatgacttc tttgagtttg  
16201 agctttttaa tatagtaaat tactctcttc agacaggtgt ctccctgct gcctttaa  
16261 cggcagtggt gaggcctctt ctgaagaaga gtaattttaga tccaagcaac tataacaatt  
16321 atcgtccagt atccaactta ccatttttaa gtaaaatgat tgaaaaaact gttttaatcc  
16381 aatttcacag tctcacagtc tcacaactc acagatcgaa gattttacgt aagtatggat  
16441 aattctctc aaaagtctt gagatcaact gtggggtccc ccaaggttca attttaggcc  
16501 cactactttt taatctatat atgctgccac tgggggacgt catcaggagg catggcgttt  
16561 gtttttatag ctacgctgat gacactcagc tctacatcac tgtgtctcct gatgacaaag  
16621 agtcgtaaac acactcttaa aatgtatttt agacattaag tcatggatgg cagagaactt  
16681 cctacagcta aaccagaaca aaacagaggt tttagtgatc ggttctgaag acaagagaga  
16741 ttgtattatc taaactaaag aattacaaaa cttctcagtg tgtgagaaac ctgggtgtca  
16801 tttttgattc tgaaatgaat tttatcccac aaattaaaaa tatcacaana acaggatttt  
16861 atcatctaaa aaatatatcc agagtcggcc catttctctc tcttgccagt acagaggtgc  
16921 taatgcatgc ttttattacc agcagactag attactgtaa tgccctgctc tctggctctc  
16981 ccagaacaag gattacaaaa ctttcaactg ctgcaaaatt cagcagcacg cgtattgaca  
17041 aggacgaggg gacaggaaca cattacacct attttaaaat cgccgcatg gcaccctgtg  
17101 caattcagaa ttgattataa agttctttta ttggtttata aatgttttaa ggggttgggc  
17161 cttcatattt atctgacatg attttaaagt atgagccctc ggggacctg aggtcctctg  
17221 ataccggcct tttagttatt ccaaaagtta gaactaaaac atacggtgag gcctcaatca  
17281 gtttttacgg acccgcctg tggaaacagcc tcccagagag cctcagggcc gtagagactg  
17341 ttcatttttt taaaggaagg ctttaagacct acctttttaa tttagctttt agttgaattt  
17401 taggaattta tttgatattt taattattta ttttctcttt ttactagttt tatatgtgta  
17461 tgtaaataca tttatttttt tgtatttttt taattttttt tttagtcact cttaccattt  
17521 catatgtcta ttaatttttt tttttttttt aacttgtcct gtccaacaac tgggcagaca  
17581 gatgagaact gagggcctct tgtgttggac atattttact taaacaacag ggggtatgaa  
17641 tcttcaaca aaccagaggt atgtctgaat aaacccttt tgtaatcgaa gccaaacttt  
17701 attcatttca atcatgtttg aaaatctttg gtgttggacc ggacggaaaa ggaaggagg  
17761 gaagaagaga gagggatgtt agagagaggg gaaggatagg aggggtataa taggaagggg  
17821 ggggataaga ccatgaagca gcatagatag gttcaaatgt agtacaanaa gggcggggcc  
17881 tgtccacaca cacactgaaa tgttatcaac acacctgcta gctgcaaaaa tgtccacatg

17941 tcaacatgta cacaaaacag atagtgttca cacacgcata cctatgcctt taaaccaact  
18001 agtgtgaaat ctttcattcg ttcaatcatg caaactatta gtacaaaggt gagctaacac  
18061 ctgtgctcag gtgagtgttt atgttcttct aaaaatggatg gtggaatgtg aaaagaagga  
18121 ggagccgcga acagtagcgg cagccggaac cccccaacgc cacacggcag caggcagggg  
18181 gacaaccgcc ccccggcgca ccaaatccgc caccggggcc aggaccagca ggaccggcgc  
18241 gagggcccca gagccagaga gcaggggaagc acgggggggaa agagagcgcc gccccagccc  
18301 aaccaggaga gcagccccc gccgccccgg aagagcccaa cgcagagtcc caccacaaga  
18361 gggcgcccac agccccagac tagcacccca tcaccacca ggagttccgg gcatatgtct  
18421 attaaggttt atgtaattat ttgtttcttg ttcatgtttt aaatataatt taattttaat  
18481 tttgttcttt ttacatttta tttgtaactc cagtgttttc ctctgagggg tccctccacat  
18541 cggtgactga cccttctcag tgaacggggt cactgcagcg ggatctcccg ggtctgacac  
18601 tttgatcgga tctggggggt tctgtggtag tgttctccgt gaacttgggt ggggggtcac  
18661 tgatgtggac atgtcccca aatatcgttt cccacttca ggacaaagcc aggtctctac  
18721 attccatcat tttatcactt ttttatcatg gtgtgcgtat gtatgtctgt gtgtgtgtgt  
18781 tgggggaggg ggtgggggtt gtcgactgtt ttgtctgtc atcttgtttt aaaatttat  
18841 tgtattttat gcacagcaca ttgagtgaca tatgtttttg taaaagtgtt atataaataa  
18901 aggttgattt gatttgattt gataagcctt tcaactgctga agaactgaag aatgctgtca  
18961 tgtctatgca gaatgggaaa agccctgaa ctgcctcacg gtttcccac tgaatttctt  
19021 aaggttttta tggataaact atcccctcta atgcttaaca tgttaaaggc ttcagcagat  
19081 cttgccggct actttgcaac agccacaatc taaattatcc taaagaaaga taaagatctt  
19141 cgatgctgca gcagatatcg gcctatatct ttgctgtgtg caaatgttaa aattttgyat  
19201 gtagcaaac acttggagcc gataattccc acattaatca gtcctgacct aactagcttt  
19261 attaaaacca gacattcata tcatagtttt aggcgcctta tgcataattt atactgcccc  
19321 tctccaaatg acaccccga aatggctctc tccacggatg ctgaaaaggt gtttgcagc  
19381 gtggagtggc cttacttgtt ttatacttag agacactttg gctataaatt cctctcatgg  
19441 attaaattaa tgcacacatc acctaggaca cgtgataatg acttctggaa atacttcccc  
19501 ttggggcgtg gaactagaca gggctgtctt ctttccctc ttttatttgc tgtagccatt  
19561 gaacaacacg cggcggccat tagaactagc tctatgtgcg gtatcttgag ggggtggtga  
19621 tatcataaag tagccttata tgcagatgac cttttattat ttctttcaga ttcagctgtc  
19681 tccatgcctc cagtttttagc tctgctgagg gaggttggtc agatctctg caacaataa  
19741 aacctaaata aaagtgaact tcttctatc aaccagaggt atatggccta cccccctatc  
19801 tgactcacct tttaaaatct ctccatgat cattaagtat ctaggcgctc aagtaacaaa  
19861 ggacttttct gatcttttca aaaccaactt taatccatta ctggatcaaa ttaatcgtga  
19921 ctgcatcaaa atgaatgtgc tgcctaaact tctctatttt tttcaatgcc taccagattt  
19981 cagcaatttt tcaggttcct tgacaattct attgcccatt tcttctggga aaaagcttcc  
20041 aaggatgaga aaattttat tgcagaaaag caatgataac ggcagactct ccctactgaa  
20101 cttttttatt ttactattgg gctgcaaaata tctgaacaat attattttgg tgtcgaagt  
20161 atatggttaa gccagcctgg ttaccaatag aggagtctgc ttgtacttct gcctctgcta  
20221 ctctactctc tcttttgtgt tttcctctct aactatctcc cacattttat accgacaaca  
20281 tcatagttaa gcattgggta aagatatgga ctcaactagg gctgcacgat atgagaaaaa  
20341 cttgcgatat gcgattttgg tgattaaatt tgcgataacg atataattcg cggatataaa  
20401 acaaatagca aaacaaccaa aaacatcatt tccatttcac tgcaacagta taaaaattat  
20461 actccaactg acataaaaagg gctcatctga ttgatcaaca atgtaaacgg gtccttccga  
20521 aagaacataa gttcaatatt tcaagctgcc atgagattgt tttagcacat ttaagtaaaa  
20581 catttattgt gattttcgcc gtcttttgtg gtatgcata tgcacagctt aataataata  
20641 ataataacga taaatttgcg gtatattgtg caggcctaga ctcaactcaa acagcacctt  
20701 ggattccaaa aaatatctct cacgttgcca ctctatctta accctcagtt tccctcatca  
20761 tttactgata aaacagcaca atgtcagtat ttttagcttt aaaaataact ttgaacaaca  
20821 gtttaatggt cattatggaa attcaattta atgcaatttt atttatatag cccaatattt  
20881 acaacaattg tcgtcgcaat gggcttcata ccggtaacag tgaataaac atgaaatcacc  
20941 aagaacataa agtttctcag aatcgattgc ctgactacag actaaactaa actgtgcac  
21001 cctgccttta gaccttctt tgcaggtctt aagtcaaaag ttaaattgggg ttaaagttt  
21061 ttcaaactta acagtttttt cattgacaat gtaactgtca aattaaagaa tggtttcatt  
21121 tttttaacca atagtttaat aataaaaggg tttttttaa aattgtaatg tgttcagtgt  
21181 cagagcagct gttcattcag atcagttcct ctttatctga aagaggtttt tgtacgacgt  
21241 tgtttcactg tgtgaacgga aagctgttac cctgctgaca gtaataaact cctgaatcct  
21301 cagcctgaac tccactgatg gtcagaggtt aatcactgcc agatccactt ccacgataac  
21361 gatcagaaac tccagactga cgtgtgtgtg catatcttat caggagttta ggagcttctc  
21421 caaatttctg aaggtaccag tgaaggtagg tgctaacact tgaactggtt tgacatctaa  
21481 tggagaaagt ttctcctgga acaacagact gagatccagg agtctgagtc acagtgattt  
21541 cacctgatga acctggaaaa aaggaaaaac agaagagtca ttgagatgaa tccagatgaa  
21601 agaaatctaa gaattgtgat gaagtttgtt tcttgatgaa tccaagttc cagcagagag  
21661 tctcaccctg aacaaggagc tccaggacag ccagcagcag agtcagtgac atctcatbg  
21721 tgctgacggt gtgtcagtg ctctgaaaag tctggacacg cactgatcaa cactgagctc  
21781 ttaactgctg gaagcagaga ggcagcacac atatgcaaat atatgcatgc agtgcagatg  
21841 gaaggaattc ggacacaact tctacactca gtccgtttat gaaattacat ttctgttatg  
21901 gagtttattt aggtaaaaaa tgtcatggtg tcacagggag tccctctctc ccccctcaat  
21961 tctctccttc atccacagat tgaaccagc tgtcagctat tacctcatct cctgctccag

22021 tattttatggt gggtaccttc cagaattcat cgccagttca tttccctcaa cgggtgcagta  
22081 cctgggtcaat cggtgtctta tctacgacag aagaatatcg tttttgtaac aagctattca  
22141 ctcaagtttt cgatctgcct acagcatccg atttctttga ttgggaaaca ttttaccact  
22201 gctataaaat aaagtacttt ttgatcttca ttgatcttca gaacaagaac tcaaaacaaa attcagcaaa  
22261 ataaaaaaaa cactctttca catctgtaat tacatattta atataagtgg tgttttccag  
22321 tcagactgtg ttgagtttgt tgtgttcaaa gtcagagagc gtgtctctct gcagtcagag  
22381 gtttttgtac gacgactcag ttagtttcta tcaactgtgt acacgtttgg tggaggaacc  
22441 agactggatc ttggaagtaa gtttctaaaa acatttataat aaaaatgaaa ctcaattgtt  
22501 tttattattt aaaagaaatt aaagagtcta gaaaaaataat tttagatttt atttttacct  
22561 tttttcaatg tttcagctcc taaattatgt tccaggtttt tatttataaa taattttaaag  
22621 tottaataaa cttttatttg tgacatctc atattaattt caaaaataaga tacttataca  
22681 aaactcttgt cttgtctttt tgccacagta tagtttgttt taattcagta ttttgacaaa  
22741 ataattttaa agtttataat agttcacatc atttctaaaa tctgcattaa cctctctctg  
22801 gggtcacggg ttgacaaacc tcttctcagc aactcttgtt ttttgtttt ttttattggc  
22861 ataaagatgt tttttttttt acattagttt atgtttttga cggatctcag gannnnnnn  
22921 nntccaagag cgtttgtcct catgaggact ctgtgtgtct atctgcatga gagctttctg  
22981 aaaggaagtg aaacagtgtg tgagtgtgtg actgatggag cagaaactaa catctgacag  
23041 aaacttcttc aaggagaaca tcaacgttca cacagtcaag gagtttgatt gacagctgtg  
23101 tgcttctctg cctctaacct gattggtgtc ttctaggtga tgtccgtccc aaactgacag  
23161 tgctgtcccc ctccatgcat gagggaagg ccacactcct gtgtctggcc aacaatggct  
23221 tcccttcagc ctggactctg tccctggaagg tgggaggcag cagcatcagc agcagctggg  
23281 aggagagcag gagccccggg gtgctgcaga aggacggcct ctacagctgg agcagcacc  
23341 tgaggctccc tgcagaccag tgggagaagc tggactctgt gacctgtgag gccaccagg  
23401 actcccagac tccagtcaca gagactctgt ggagaaacca gtgttctctag tcaccactg  
23461 actgactgga acaatattat tgtgttttgg cttttactga gatttcagct gcattgatgt  
23521 tttaactctc tttcttttga tgctaaaaaa aacattttta ttagaagtta cttgtttgat  
23581 actttatgca aaataaaaaa tactctttga agttgtttat ttgtaacttc ttacagatat  
23641 gctttttaat taaaacattt acattgatta aatggtaaaa tacattttgt gggctacagt  
23701 ctgagaccag gggtcaccaa gcagtcacca tgggtcggccg tggggaaaaa ttaaagcctc  
23761 aaaaatggat gctctaaaaa tatcacagca catgagggaa ttcaatataa tttaaaaaaa  
23821 tttaattaat cttctgaaga aattaggggt tcaacgaata acttgccaca gttctgaca  
23881 cacgtagacc acagattccc cctcccacca ccaccactg ctctcgtctg tcttctgtg  
23941 caccctctc ttatcattta ggtcaattgt ctgttcacac cgagcgcaat tcaagcgtca  
24001 aaatggcgtc catggctctt gttttaaact gcacaaagt tgcagcttca ggtttctcct  
24061 aaagtgtttt cacctgaagc tcccaccgcc tgtgggaggc gtttctgtca aatacttttc  
24121 ttgacctcat caccaaggac ggggatgat agagattagg ttcatttat ttgaagatt  
24181 ctacaactgc atcaatgaga agcacactgc tccatgtgtg ggttcatgaa ggttcatg  
24241 gaggagcagc aggtgggccc aactatggcg ggaaaaagt gctgctctc tgcaactagt  
24301 gggaggggct tcatagcagc aggggacgca gtgaaagaat ggaaagttag acattctgac  
24361 atcacctgat tctcttactt ttttaataaa tatattttta agatgcaacg tcttttttcc  
24421 ttggagacta ttttactaa gtctgtgaaa aaatcccaga aagcaactga agcttcat  
24481 agagctgcac atctttacat aaagagaaag ccggttagat ttctatgtag gcctcccaca  
24541 tacatagtaa atgaacaac aaatgacaga aattattgat gaaactaaa ctatlaatct  
24601 gaaaatgttg cacaaaatgt gacattttca ttcattaagc tttaaaaaaa ctccaaaact  
24661 tgttctgaca agaagattga tgatttctt caaaaatgtt gatctattga accaccagta  
24721 caactagtgt cctcctgac tttctaattt ttcagcagat aaacagaaat aaatcaatgt  
24781 tcatgttta tacatgtttt tcttgtcatt actgttgtgt aaatcattga ttagaattgt  
24841 ggggaaaaat acttttgata tgtgaacct taattcatag tgctaagata tctactgta  
24901 attattattt cattaactat actatactag tctgtggttt agtgttttgg tgaatttga  
24961 gtaaacaggc cctgagtagc cttcatatg acttagacc ataaaatagt cctcactctg  
25021 aataagggtg gtgatccctg atctagacag tagtaaatat attttctat tttttacct  
25081 gataaacaaa tgcagatact ttgatggaat gtaaaatagt gaatgtacag tttgtagatc  
25141 gctgtaaatg tctgtctcct aaaaaacaca aaaatattaa tgtctgaacc tctggtatca  
25201 aagtgaaaaa catccaaagg tggaaaatat gtcttcataat tcatagctc agcattttt  
25261 tcttctggta tattcattaa tgttagaaaa tgtaataatt tatgggaaag tccacatttg  
25321 caccaaaaagg ttgagagcag ctgttcattc agatcagttc ctctttagct gaaagaggtt  
25381 tttgtacgac gttgtttcac tgtgtgtagc gaaagctgta accctgctga cagtaataaa  
25441 ctctgaatc ttcagcctga actccactga tggtcagagt gtaatcactg ccagatccac  
25501 tccacgaaa acgatcagaa actccagact gacgagttga agcatcatat atcaggagtt  
25561 taggagcttc tccagatttc tgaagatacc atccaatgtt gtttccaaca tatgaactgg  
25621 tttgacatct aatggagaaa gtttctctct gaacaacaga ctgagatcca ggagtctgag  
25681 tcacagtgat ttcacctgat gaacctggaa aaaaggaaaa acagaagagt cattgagatg  
25741 aatccagatg acagaaatct aagaattgtg atgaagtttg tttcctgatg aatccaagtt  
25801 tccagcagag agtctcacc tgaacaagga gctccaggag agccagcag agactcagtg  
25861 acatcctcat tgtgctgagc gtgtgtcagt gtctctgaaa ggtctggaca gccactgatc  
25921 aacactgagc tcttaactgc tggagcaga gaggcagcac acatatgcaa acacactgag  
25981 tcagtcactc gcagctgttc tcagcagctc tggatgttca gcttggaatc tttggcctac  
26041 aggagctgca gcagcacaac tctgggataa agactccaca ctcagtcact ttagcagaat

26101 agatatagtg tttggacaag agtggttaaag agtcttttaa ttacagataa gagtgttttg  
26161 gccttttacag atagacactt tcatctcatg gctgatcatt cttcacaata aaaataat  
26221 atgtgtgcct attttagtga ggcattgtggc taaatttaag aataattcaa aactagt  
26281 ctttaactat ttgtagtccc ttcacagatg cagggttagg agctaaaaaa gcaaaacg  
26341 ctagtacagaa gctccccctc agttaaggyt ttagatctga aggagaaacag agttttgat  
26401 aaagagattc tctgcattta cagggttaga agttaagaa agtgggtcct ccaaagctaa  
26461 aagctcctcc atggttgctg gtttagaagc acaaagaggt aaatcttaac atttcaaagc  
26521 tctccacag ctgcaggatc aggagctgga aaagcacaaa actgtgagtc tgaagctcct  
26581 tcaactgctat gggttttgga gcacaaacat catcaagggt gggagctcct ccacacttat  
26641 gggatcagga gctgacaaaa ctggatctta gaagtcagaa acttctccac aatagaggt  
26701 taggagctaa gagatggaag cagttcactg atttcaaggy ttttacattt atagaggact  
26761 cttcctgatt tctgttcctt gatgctcatc agtgaggatt ctgtacaaaa ggccccaaag  
26821 acaataaaat cagattatct ttacctgtaa aagggttggg agactgtcgt caatctatca  
26881 agtcacatga tcatthtcat ggagatgagt aacttaaatc taaaaactga aaaagttcaa  
26941 aaagtgtcac tgaagatggt tctgacaaaa gaagatcctg gaataaagac tctacagtat  
27001 ttgaatgttg atgttaaatt gtgtgtttc tctcctgttg catttgccga gtgagatg  
27061 ggcaggtttg aaattgaaag tgcagcattt tttttctg caatgcgtg tgatttcgcc  
27121 acgcttcaaa cgccccaac tctgtttttt tccctcctcc tcatcgctga tgtttcctc  
27181 agtggcgctg tctgttattc agcctgatt taatttagta agtategttc agggtttatt  
27241 ttgaatgaaa tgctttaaaa tgctcttatg ctaccataaa tgtgggttac tgtgtttaa  
27301 acatatgtgt gatacgatcg ttacagagct taatgtgaca aatgtagt cgtgacgtcg  
27361 tagcagacgt atcatggcga gccaaaccca aaatgcgtct ctgcccgtaa gttacgacag  
27421 tgatgaattt ttttcagagg tagaaatgat ctgttatgct gcaatcacac taaactgat  
27481 ctgcgtgtga aattcacggt ggaggctctc gttgtgtggt aaagtgtgct gctggacaca  
27541 tgtccaaaaa tgtcactcaa agcctctaac ggttgtgtgg gaggagctac gcgcaaaagt  
27601 ttttaagccc gttgctacat ggaagcattg ggttttgaat gcagctttaa gcttttataa  
27661 atcactgatc tccattataa aaaaggtttt tgtaaaaaa gattaatcaa cgtgctcgtg  
27721 ttgtgttcag gtaccgaact acaatgttta gtgtttccct ccaggtagac gccaaaggca  
27781 ggcaggtaac ttgtctcctg atcagttact tgtctagagc ttttaaaaa aaacaaaaat  
27841 gcaatagttt gtgtagtga acaaatgttt tgatcagaat ataattgaa cattttcctt  
27901 taccattgaa aaatctcttt tggctttttt tcagagactg aacttcagaa ggttcaccag  
27961 aaagtcacca tttcaccagg aaacagctgt cagtgggtga gttttatact tatttaatat  
28021 atttatcctg aactattacc attattagat ttatacggca gcatggaac atttatgcc  
28081 atttagccaa aggtctaaag agttgaaatt atttacaatt taactaaaca tatttagatt  
28141 gcaggctgaa ggtggcacia tggaaatggag gtgcaagttg tgttctgcta ctttggcact  
28201 atgcagtact acatataata ctgcagtact acatagccaa tattccaaag ttttccact  
28261 gcaatgtatg tggagacact ttggaatatt gtcagtctt tatgacagnn nnnnnmntg  
28321 aactgaagtg gatcatgcca taaacactgc attgtcctct tactagaaat agacatctag  
28381 aaaaggtata attttattat ttcttaaagt tcttaagta gatattggaa gtgtttgctc  
28441 tgcgtttgct tcaatggtaa tgtatatttc tttttattct tttaggacca gcgtgacgtg  
28501 aacatgagac gggcacgtgt cctccatgca cttcctgttt atctgcatga agatgcctcc  
28561 agcttcttag agacctgtac tgtaagtga catgactccc tgacaatgct tttctctaat  
28621 cctttaatat tgattgagat tttattgagt tgcataataa ataggcaatt gttgtagtt  
28681 gtaaaactga gtgatattt taaatggtt taagaatgag acggaagatg acggaagac  
28741 atcagggact cctgattgga aggagtggga acctttctgt ttacctttc tgctcctgat  
28801 ccatcattat ttgaataaag aaaaatgaag ctttagtctt aaattattt ataaatgtcc  
28861 tccattttca gaaaaatgct aaagaacttt ttaaaaacac aatthtaatt ggagttggtc  
28921 tttaaagcat catagccatt tgattaaaag ctaacagaat gctagcaaga aaagattcac  
28981 attggcagga atgtcagttt tggacattag tgtgatgaat atctttgagg gtctgaactt  
29041 atctgtgtht tttgtttgtt atttccaga atactagacc tcacagacac tgctgtggtt  
29101 ctcctctcag ttgtcgtggt gacgctcctg atgctgccc cagtagtccc acagatcagg  
29161 ctgactaatc tcttctactc ttcggggact tctatgctct ggacctacag cccccaaaa  
29221 aacttgaact tgcttccaca gttattcaga acgttgtcat gagccttgag gacagcaaac  
29281 cactgaaagg acattttattg acacgggaga atgtttcgtt gagtgagct cccagaatgg  
29341 actatttght ggttttaagtg ttatgtaact gatgtgtttt gttgtgatca tttgctttc  
29401 tactgtacaa taaaaaacac acactttttg tcaatatggt gtgttgact cttataatgc  
29461 agttttattt cactgattgt tcttctatct tcttgatatt tgtgctttt tttaaagagc  
29521 aatthaaaaa agtgtattaa gcaatcatta gtgtggcttt catatttght gttttttatc  
29581 aatggttagtt tataaaatgt tgtagtgggg cagtatcaat acctctgttt agaatacatt  
29641 tcaagtccaa acatttttaag ctgaagaatt ttaaatgttt tcaatgctac acatttaatg  
29701 agtttagagaa tttataaaac atttgagtga attttacata ttttgtgagt tgtgtaatat  
29761 tataaaaaata tagtttagtta aagtgttttt tttagttgga aaaaattaaa aactttgagc  
29821 aataatctgc tcttttataa gtttaaggaat cttattattt ttaatatgaa ataatacaaa  
29881 ttttaagccaa ctgacagtat aaattttaat aaatgttaac ttaaaagtth taataatata  
29941 actthaaaaa tattgcgtaa tctgtttacaa aataattttt aagttctgtc aactcgttag  
30001 ggttttacagt tatccaatac attttttaat aaactgttta ctcagtgtgat catttcaatt  
30061 ggggttagtc attttaaac gcagacgaaa acgcataaaa tagtgtcact ataggtgttt  
30121 ctcaccagag gaaggggcta acatgttact tttttcata atttgtatga atttctgaga

30181 atttacacta ttgcatgaag tgtctctgaa ttgtgtgttt agtgtgtcta cagtaaataca  
30241 gtcagtggtt cagtcctctgg aagaacttga ggcagaaaaca ttcaaagtga tttcagttca  
30301 ttctgatgaa ggagggtttt gtacgatgaac ttttactgtg gtgaacacat cctgactggt  
30361 gatattgtga taactctgac agtaataaac tcctgaatct tcagccttga cctcactgat  
30421 ggtcagatg aagtcaattc catttctctga tccacttcca ctgaatctgg aggagattcc  
30481 tgaaaatctg tctgatgttc tgtagatcag agcttttagga gcttctccag atttctgatg  
30541 gtaccaggca agatagtatt gtgaacctga atagttagct acttgttgac tggccttaca  
30601 gtcaatagtg accttttgac cgagctgcac tgatttagct gctggctgag tcacaacaac  
30661 attttgtcca acagaacctg cagagagaga agaaccacaa agaactgag atgctgagga  
30721 gaaannnnnn nnnnggattc acatcaatgg atcaatcaat cattccagat ttgatttaa  
30781 aatattgatt aatgctcaaa tataatattt gtttttcacc actagcacgt attagaatac  
30841 ctttacatct acaaaaataag aacttaagta aaaatgtacc aaaatgtgac tggaaaaaaa  
30901 aaaactatta ttattattat ttctgtaaga acttttttca catcaatccg ttgtgttttc  
30961 cagtcagact gtgttgagtt tgttgtgttc aaagtcagag agcgtgtctc tctgcagtca  
31021 gaggtttttg tacgacgact cagttagttt gtatcactgt ggtacacgtt tgggtggagga  
31081 accagactgg aggttgattg taagtaattt attttcaatt tacatccatg ttttaacaaa  
31141 aagtgttttc ttttaagttc cataaactaa catttttcta cttttatgat tttagacatg  
31201 ttagtttttt tatataatgc agcaaacatt cacagatgca gataaacgtg attccatttg  
31261 aaaatcattt gtcagtaatc tgtctgtaaa ggtgaattta tagttttcca acattttttc  
31321 attcaattat aacatatgaa ccagtaattg tatgttattt ttacaatttt gtgttgagaa  
31381 aaaaataaaa cttccatggt ttaaagttgt aataattcta gaaacgaatt gatttttaaa  
31441 gttttggaaa atagattatg tattttttat ttgaaagtaa agtatgacat tttaatgtgt  
31501 ttatgttttt taacatctca aagtattcat aggtgaatat tgtgacgtaa ttaatatata  
31561 aaaaatlaag gtaaacaaaga cgtttctcog ttaaattgtt actttttatc tctcctcatg  
31621 tcagaatctg tgaactctat taaataattt taacctttat tattctgctc aagcaaatgt  
31681 tagaccatat tttgagaaaa atcttttaaa aattactatt attattcagt aaagaaaaga  
31741 gggaaatgta caaaaataat gttttttttc tttctcggat tgttaaaagt taagtaaagt  
31801 aagttcatag ctcaaagatc tttttcttat tttctgttaa tactgaaacc tgtttgttga  
31861 tgtggttcat tgggtgaagct catctgttgc catggttaca gcaccaatag aaggaagtga  
31921 aacattaaaa aaagtgttaa actaacgtaa gaaataaagc agcattttgc tgcaggaaga  
31981 gtttctgttc tgtttggagg atttctcatg aacttgtttg tgtctcctca tgcagtgggt  
32041 catgttcccc ccaagctgac agtgcgtgac cctccatgac atgaggggaa gggcacactc  
32101 ctgtgtctgg ccaacaatgg cttcccttca ggctggactc tgtcctggaa ggtgggctgc  
32161 agcagcatca gcagctggtg ggaggagagc aggagccccg ggggtgctgca gaaggacggc  
32221 ctctacagct ggagcagcac cctgaggctc cctgcagacc agtgggagaa gctggactct  
32281 gtgacctgtg agggccacca ggactcccag actccagtc cagagactct gtggagaaac  
32341 cagtgttcct agtcaccacc tgcactgact gaacaatact attgtgtttt tgcctttacc  
32401 gtgatttcag ctgtagtgat tttttaatct tctttctttg tgtgctataa aaacattttt  
32461 attagatgct acttgtttta tgcgtctgac aaaataaaat cctcttcaat gttgtttaat  
32521 ttgtgatttc taacaaatac atacatttta attaaaacat ttacattaat ttgtgaaata  
32581 aatttcagga cttttaaagt cctgttgcat tgatggatgg catcctgttt ctgtcagata  
32641 aaggtataca gtctatacca ggggtcacca acacagtgcc cacagatcat gagggaatac  
32701 aatataattt ttaaaagttt cactcatggt tggagaatg taggggtgct aagaataatt  
32761 atccacagct ctgcacacac gtggaccaca gattatggtc agactttgtt agcattatct  
32821 gcgaaaaaat cccagaaaac aactgaagct tctgttagag ctgcacatct ttacataaag  
32881 agaaagccgg ttagatttct atgtaggcct cccacataca tagtaaatga acagacaaat  
32941 gacataaatt attgatgaaa ctaacactat taactctgaa atgttgcacg aaatgttaca  
33001 ttttcattca ttaagctttc aaaaaactcc aaaacttgtt ctgacaagaa gattgatgat  
33061 ttccttggct tcaaaaatgt tgatctattg aaccaccaat acaactagtg tccctcctga  
33121 ctttctaagt tttcagcaga taaacagaaa taaatcaatg tttcatgitt atacatgitt  
33181 ttcttctgct tactgttgtg taaatcattg attagaattg tggaaaaaaa tactattgat  
33241 atgtgagcaa tcaattcata atgtctgcaat aactactgat aattattatt ctactacta  
33301 ttactatact agtctgtggt ttagtttttt ggtgaatttg cagtaaacag gtctctgagta  
33361 gcccttcata cgactcagac ccataaaaata gtccctcatca atcaatcata ctttatttaa  
33421 aaagcacttt tcatataaaa tagtaacaca aagtgttcta cattaaaaca aaataccctt  
33481 acctacacaa ctgtcatggt gctgtcaga ctccctcccc tccagctctg cctgctctgc  
33541 tccctgattg ccaccagctg acgccactca cctcatcggc catactgctt aaaaggagac  
33601 cttactcatc agttcaacgc cagttctgta ccccttatgg tgactatgct tggctttaag  
33661 tttatgetct gcaaaactct gtcttgttcc aagcctcaa ctaattattg ccttttgtct  
33721 caggattacc agcacttcac gagtgacgtc agcgtctctt ttcctcctgc tgcctcagaga  
33781 catcctgagg atcccacggc tctccttaac cgcactaagc cctccagcca cggccaccgc  
33841 cgttgtcaag tccggacttc acccagctac tactcctacc atcttcttag caggaataat  
33901 aacctttttc tgcgcaaatc cctcacctgt cttccttctg ggttacaga tctgggtcct  
33961 cacgcttagc cgtcatgaca acaactccc acttcttaca catctccac ccctaattga  
34021 tggggaaaga caatgacaaa tgagaaataa gcttagcacg aaaaggctga taattgtatc  
34081 ctccctctct gtgaacagcc gcatgaccag ccaaatgcag catcacaggc ggggaccgct  
34141 ccaccacagc taagtgtgta tgcaggtccc catctagagc tgcagtggtc gaagagcatc  
34201 caaccagag ggagtggtcc caaccgagga agcacaggaa aaaaattaaa gagaatgaaa

34261 cagtaataat tttgataaaa gcaatacaca ataaaacatt gaaatacagat aaattgaaat  
34321 taaaataaca catttaaatc tagtgtaagt ttgtaaaaaga agataaaaatg gattaataaaa  
34381 aataaccaaa taaatagtgg tagtaaaaaa ttagctgaaa gccagggttaa aaagatgggt  
34441 ctttagcctt ttcttcaata ttttaagtct ctctgaggct gtaattttta aaaactggaag  
34501 gttctaattt agttttcttg agtaacggtt tcaccactgc cgttttaaaag gcagcaggaa  
34561 aaataccctg ctgtagagag gagttcatgg tatttaaaat ctactgtca aaagaccat  
34621 aaaatgattt aaaaagtgat gtagggatgg gatctaaaaa acaggctggt agattaactt  
34681 gggagaaaac tcaaccaagt gttgcagctt caaccaggtc aaaactgtcc agtgcttct  
34741 caggtaaaat caagccatct ttaccaataa aaaggctttt ctgtccattt atgatgttcg  
34801 atctgacaga gtggaacttg ccgctgaagt ggtctgcaa gtctcacac aatgagacgg  
34861 aggctggcat tgtgtttta ttacattag agttgatcaa agacttaatt ggggtaaga  
34921 ggactctggg gttattttta tttcagaga tgatgttcgc aaagtaggaa tttctggtct  
34981 ttactgtttg attatatagt tttagtgggt tttggtacag ttgatagttt atttgaagt  
35041 tgtgtttctt ccaaagtctt tcagcatatc tacaacgtct ctcaattgt ttaatttct  
35101 cagttcttca agggggtgtg ggtttgatc ttatctttt tgattttagt ggagaaactg  
35161 agtcgagact ggattttaat ttactgttaa aattttcaac gagtagatca cagggggctg  
35221 gtaagacaag tggagagtaa gagcgaacag atgtaacaaa cttttcgac acttcaggaa  
35281 tcaagtagtg tttcttacc gttctgacag aggtctcttg tttataaaa ccagcagatg  
35341 taaaaagcac acagtaatgg tcagatacag ccagatccac aacagtgaac acactggtag  
35401 gtaaaccatg actgatgac aggtcaagag tgtgccctt gttgtgagtc gctgcatgac  
35461 gtgtttgtta aatcaagag aagcgagcaa gtccaaaaac tgagtgttc aatagtcga  
35521 cttcccatct atatgcagga agtgtggaca gatgctaaaa actcagaaaa cttctcaata  
35581 aaaacgagc ttggtttggg ttggtctgat actgtgatgc agaaaactga aggggtgta  
35641 aaaacgaag catgatgtt aaagctggg tctcatcta atgaaattg ctttgctga  
35701 aaggagtgg acattataga tgcagtacca ccaccattt tccctctt ggttgaaaa  
35761 acaaagctaa aatttggtg agaggctct gtgagaacag tagatgcatc cgtgctcagc  
35821 catgtttcag ttaaaaagag tccatcaata ttataatcat ggataaaaata atttatgata  
35881 aatgttttgt tggacaaaaga tagaacgtta aaaagagggg ggtggagtgg ttgtggaagc  
35941 tgcttctca ggttttggg ctctcttaag tggacgaagc cagttaatgt ttgctttct  
36001 cctgcacgc cctcataga agacctgtct gtgataatgg tcttaatggg atagagctgg  
36061 gggcagcag tctgtcaag gaagcactgt tgatggatga agcagtttct ttggaatgt  
36121 ggggggttga taccacatcc agtcagtcac ttccacagac tgatgtctgc acggatgaag  
36181 aggaggttg gactggtgtg ggcagatgg gggccggtg tgtctggaca gaggttagt  
36241 atccttgatc ttgacagtaa taaatatatt tccattttt tacctgataa attattgag  
36301 atactttgat ggaatgtaaa acagtgaatg tacagttgt agatcgctgt aaaagttgt  
36361 ctctaaaaa acacacaaac attaatgtct gaacatctag taacaaagt aaaaacatcc  
36421 aacggtggag aatattgtct aattgttct agctaagcat ttctttctc ttggttatct  
36481 attgatgtta gagtaagaat ttatgggaaa tccacattt caccaaaagg ttgagagcag  
36541 ctgttcattc agatcagttc ctcttttagt gaaagaggtt tttgtacggc gttgtttcac  
36601 tgtgtgaacg gaaagctgtt actctgctga cagtaataaa ctctgaatc ttcagcctga  
36661 actccactga tggtcagagt gaaatcactg ccagatccac ttccacgaaa acgatcagaa  
36721 actccagact gacgagttgt tgccttttt atcaggagtt taggagctt tccagattc  
36781 tgaagatacc agtggatgta gttgctaaca cttgaactgg ttgacatct aatggagaca  
36841 gttgtttctg gaacaacaga ctgagatcca ggagtctgag tcacagtgat ttccatgat  
36901 gaacctgaaa aaaaggaaaa acagaagagt cattgagatg aatccagatg aaagaaatct  
36961 agaattgtg atgaagtttg tttctgatg aatccaagtt tccagcagag agtctcacc  
37021 tgaacaagga gctccaggac agccagcagc agagtctgag acatcctcat tgtgctgag  
37081 gtgtgtcagt gtctctgaaa ggtctggaca gccactgatc aacactgagc tcttaactgc  
37141 tggaagcaga gaggcagcac acatatgcaa acacactgag tcagtcactc gcagctgtt  
37201 atgagaaaag gaaaatcaga gcaggagatt aaaagctgga ttgtagcggc gtctgctgt  
37261 atgctgttgt tgtgttgctc cattttggg aagagatctc tgagtcagaa agcaagctc  
37321 tcatcttaat gtgtgcagct tactacaaa gatggacttg gtcagaattt gggttcaatc  
37381 tacaggtgca gatgttgcta tcatcttctg aacttgggta actaaatcta ttactaatga  
37441 agatattaac atatctgttt acaatgttta tgcactgac agacaaaata aaggaggcgg  
37501 tgtagctgtc tatttcaaat caagattcaa tgcttctgtt attttgtcaa tcaatctgca  
37561 aacaattgga atttttggct ttgaatgtag aaatagtaaa atctcttctt attactgtt  
37621 ttggatgtta caggcctcca tctgctcaa aagagacatt attttacta cagcagctt  
37681 tgactaaagt caattacact caattactta tggctgggta tttaaactgg tactggttaa  
37741 gtgcaacttc cagtgaattc aaagtattt atgattccat taacttgaat cagttagtga  
37801 atctacctac caggccaaat ctcaaagtct cagaaaagtc cacattcact gatttggtt  
37861 taacaaatgt gccgcataca ttttcttcac ctggtgtgtt ctgtaatgat gtgagttatc  
37921 attgtgttgt tacggtttgc agaaacacta aaattactaa atgtaaatca cgtatagttt  
37981 gtaagaggaa tcttaaacat tttaatgagc aagctcttta tcatgattt tcatagtta  
38041 atgggtaaat attggtctac tgcagagcgc tagcttggag attttctaag gacagtttt  
38101 tacaatcgt aaattaacat cctcctttac aaagatttag aattaaggga cgtaaaaaatc  
38161 cctgggtttc acaggcactt gcagatattc tacatgagcg taatagagca tggacaaggg  
38221 caaaacaaac ggattcttcc actgattggt ctgttttcaa cagtttagga ataggtgtcc  
38281 ttctctaata aaaaaggcca aatctgaata ttttctgtct gtcactactg agaaccttaa



38341 taaccatag aaattctgga aagtgatcat gtctctctct gtgactaaaa tgaccaaga  
38401 acttcctact tctgttgta aagattctga catagttaat gataaaactg aagtcctgga  
38461 ttgattcaat gagcattttt ttatcatcag gttccttgtt tgattctgca ggaagtcct  
38521 caacaaactc ctgcacagaa tcccctatgg tttcttgaga cccatttaac ttaaccattt  
38581 aatctttcaa tcaaagataa agaaattcca tcagtttggg aaacagcttt tgttttgct  
38641 ttattaaaag gaggtgatcc atccgtgctg actaactatg ggcctttttc acatttatgt  
38701 gttttatcca aaattctgga atcttttagtc tatgaccagt tggaagagtt cttttactct  
38761 aataacattc tttctatat tcaattgggt tttagaaaaa agcacagtac caacatcgct  
38821 actattaagt tgataaaaaga cattattgtg gcaattgata aaaaaactgt actgtgcatc  
38881 acttttatag atttgtcgcc agtctgtcgc aggaatatga caaggatatg taattttatg  
38941 ataggctact aaactgtttt tattgtaga aacacatttt aaattatcaa aaaaactaat  
39001 tcgttaaaga tttccttttt catgaaactaa attattaatg aaacacattt gcacaaaaa  
39061 gggtgagtgc agctgttcat tcagatcagt tctcttttag ctcaaagagg tttttgtacg  
39121 acgttgtttc actgtgtgaa caagctgcta ccctgctgac agtaataaac tcttgaatct  
39181 tcagcctgaa ctccactgat ggctcagagt aaatcactgc cagatccact tccacgaaaa  
39241 cgatcagaaa ctccagactg acgtgttgtt gcataatata tcaggagttt aggagcttct  
39301 ccagatttct gaaggtacca gtgaaggtg gtgccaacac ttgaactggt ttgacatcta  
39361 atgggaaaag tttgttcagg aacaacagag tgagatccag gagtctgagt cacagtgat  
39421 tcacctgatg aacctggaaa aaaggaaaaa cagaagagtc attgagatga atccagatga  
39481 aagaaatcta agaattgtga tgaagttgt ttctgatga atccaagtt ccagcagaga  
39541 gtctcacctc gaacaaggag ctccaggaca gccagcagca gagtcagtga catcctcatt  
39601 gtgctgcagg tgtgtcagt tctctgaaag gtctggacag ccactgatca acactgagct  
39661 cttaactgct ggaagcagag aggcagcaca catatgcaaa cacactgagt cagtcatctg  
39721 cagctgttct cagcgcctct ggatgttcag cttggaatct ttggcctaca ggcagctcag  
39781 cagcacaact ctgggataaa gactccacaa tcagtcactt tagcagaata gatatagtgt  
39841 ttagacaaga gtgttaaaga gtcttttaac tacagataag agttttttgg ccattacaga  
39901 tagacacttt catctcatgg ctgatcattc ttcacaaata aaataattta tgtgtgccta  
39961 ttttagtgaa gcatgtggct aaatttaaga ataattcaaa acaagcttgc ttttactatt  
40021 tgtagtccct tcacagatgc aggttttagga gctaaaaaag caaagaagtt ctagtcaaaa  
40081 gtcctctctc agttaagggt ttgatctga agggagaacag agtttttagt aaagagattc  
40141 tctgcattta caggtttagg agttaaagaa agtctccct ccaaagctaa aagctctcc  
40201 atggttgctg gtttagaagc acaaagaggt aaatcttcac attcctaac tctccacag  
40261 ctgcaggatc aggagctgga aaagcacaaa actgtgagtc tgaagctctt tcaactgctt  
40321 gggttttgga gcacaaacat catccagttt tgtcagctcc tccacactta cgggatcagg  
40381 agctgacaaa attggatttt aaaagtcaga aacttttcca caatatgagt ttaggagcta  
40441 agagatggaa acagttcact gatttcaagg gttttacatt tatagaggac tcttctgat  
40501 tctgtctcct ttatgctcat cagtgaatc tctgtaccaa aagccccaga gacataaaaa  
40561 tcagatcatc tttactgta aaaggtttgg tagactgtgg tcaatctann nnnnnnnnn  
40621 nnnnnnnnnn nnnnnnnnnn nnnnnnnnnn nnnnnnnnnn nnnnnnnnnn nnnnnnnnnn  
40681 nnnnnnnnnn nnnnnnnnnn nnnnnnnnnn nnnnnnnnnn nnnnnnnnnn nnnnnnnnnn  
40741 nnnntgttt cagtctctgg aagaacttga ggcagaaaaca ttcaaagtag tttcagttca  
40801 ttctgatgaa ggaggttttt gtacgatgac ttttactgt gtgaacacat actgactgtt  
40861 gataacgtgc agactctgac agtaataaac tcttgaatct tcagcctgga ctccactgat  
40921 ggtcagagtg aagtcaattc catttctgga tccacttcca ctgaaatcgg aggagattcc  
40981 tgaaaatctc tctgatgttc tgtgatcag agcttttagga gcttctccag atttctgatg  
41041 gtaccaggca agccagattt gtgaacctga atagtgatgt acttgttgac tggccttaca  
41101 gtcaatagag accttttgat tgagctgcac tgatttagct gctggctgag tcaaaacac  
41161 attttgtcca acagaacctg cagagagaga agaaccacaa agaacatgag atgctgagga  
41221 gaaactcagc tggactccag atgatttca catgacacaa acatcatctt cctcacctg  
41281 aatgaagcag aggagagtcc agatgaggc gcagatcaa gtcatggtt gactgaggag  
41341 gaggatttct gtgtcttctg ctgtgatgaa ggacagctgt cagtcattca gcttcaact  
41401 ctcaggacta taaagtctcc cagagcactg gagcatggag ctgctgatgc aaagtgttc  
41461 tatggaaatg caaccactga ctccaacagg aacatggatc tctgtcatca ggattcacat  
41521 caatggatca atcgatcatt ccagatggga ttcaaaaata ttgattcatg ctcaaatata  
41581 atatttgttt ttcaccacta gtacatatta gaataccttt acatttgcaa aataagaact  
41641 taagtagaaa ttaagctaaa agctgaaaaa aataaaaact tgtattatta tatcagtaag  
41701 aacctttttc tcatcaatct gttgtgtttt ccagtcagat tgtgttgagt ttgtgtgtt  
41761 caaagtcaga gagcgtgtct ctctgcagtc agaggttttt gtacgacgac tcagttagtt  
41821 tgtatcactg tgggtgactt ttggtggagg aaccagactg gaggttgatt gtaagtaatt  
41881 tattttcaat ttacatccat gttttaacaa aaagtgtttt ctattaagta ccataagcta  
41941 atatttttct acttttatga ttttcacaga tttttttttt tcatataatg caggaaacat  
42001 tcacagatgc agataaacgt gattccattt gaaaatcatt tgtcagtaat ctgtctgtaa  
42061 aggtgaattt atagttttcc aacattattt cattcagta taacatagta accagtaatt  
42121 ttatgttatt ttaactattt tttttctgaa aaaaataaaa cttcctagtt ttaagttgca  
42181 ataattctgg aaaaagattg tttttgtca ttgtttaaag tttttgaaaa taaattacag  
42241 attttttttt aagtaaagtc tgaaaatata attgtgtgaa tttttaaaca tctcaaagta  
42301 ctcataggtg aatattgtga agtaattttt aaaaataaag tgaacaagaa gtatcaaggt  
42361 caaattgttg cttttattct cgtctcatgt cagaactctgt gaactctgtt aaatattttt

42421 aacctttatg aatctgctca aggaaatgtt agaccatata ttgagactaa tcttttaaga  
42481 aaatgattct gtttattatt gactaaagaa aacaaggaaat gtgaacatag tgaatgtctt  
42541 tttctgtgtt gggttgttat acgttaagtg aagtaagttt atatctcaa gatcttttc  
42601 ttattttacg ttgagactga aacctgtttg ttgatgtggt tcattgttga agctcatctg  
42661 ttgccatggt tacagcacct aaagaaggaa gtgaaagatt gaaaaaagtg ttaactaac  
42721 tgaagaaata aagcagcatt ttgctgcagg aagagtttct gttctctttg gatgatttct  
42781 cacgaacttg tttgtgtctc ctcatgcagt gggctcatgt cccccaagc tgacagtgtc  
42841 gtccccctcc atgcatgagg ggaaggccac actcctgtgt ctggccaaca atggcttccc  
42901 ttcaggctgg actctgtcct ggaagggtgg ctgcagcagc atcagcagca gctgggagga  
42961 gagcaggagc cccgggtgct tgcagaagga cggcctctac agctggagca gccacctgag  
43021 gctccctgca gaccagtggg agaagctgga ctctgtgacc tgtgaggcca cccaggctc  
43081 ccagactcca gtcgtagaga ctctgtggag aaaccagtgt tcctagtac cacctgactg  
43141 actggaacaa tattattgtg tttttgcttt tactgagatt tcagctgcat tgatgtttt  
43201 ttaatccttt tttctttgtg ggctataaaa acatthttat tggacgttac tcttttgata  
43261 ctttctgcat aataaaaatt gctctccaaa atthtttctt ttgtaattc ttacaaattt  
43321 acatthttac taaaacatta acatcgtcta atthctatca tcgtcttata aatthcagga  
43381 cttctaagtt ctgttgcat gatggatgtc agcctgttac tgtcagata aggtgggcta  
43441 cagttagaa caggggtcac caacgcagta accatggtcg cccatgacca cccaggctg  
43501 tgtgtgtgga caggctccgc cttttttttt ttttttaca cttttgnnnn nnnnnngctt  
43561 caactagtcc agaactcagc tgcccgcac atctccagaa cccctcctt cagtcacatc  
43621 actccagttc tccaccagct gcaactggta cccataacct ccaggatcca attcaaacct  
43681 ctctgtttca cctttaaggc cctccataac ctggctcctc cttatctctc cgacctcctt  
43741 catatcaaaa accctctcgc ttatctcgg tcgtctcct ctgttcagct ctctgtccct  
43801 cccgccgac ttgtcacaat ggggaagcaga gccttcagct gctctgctcc caaactctgg  
43861 aattccctcc ctctgacct ccgtaacata gactctctgc ctactttcag atctaaactc  
43921 aaaacctatc tgttcatttc tgccttccca tcttgattca ctttttattt tatctactat  
43981 ttttattgtg cttttaatgt ctatthttaa cttttgtttt gtaaagtgtc cttgggtttc  
44041 ttgaaaggcg ctttaaataa aatggattat tattattatt attattatta ttaactactc  
44101 tacgaaggga acatgctatc tagtgtatct gctatgtgtt taccggcac cattgaccgt  
44161 tgggcccagc ccgttcaca ggggagcata ctatctgaag agagaggaa gaatgaggg  
44221 gagccaacaa gattacacaa cctgattcaa ttaaacacc aatgcatttt atactcatca  
44281 tctgtggctt ccacttgagg aaggacttct cttgagataa tcttttttcc ttacacttca  
44341 gggtaacaaa accccaaca ccaagatcat ccagaagaaa atgtgaatgt ataactcagt  
44401 tgtaataaag atgaggtgtg ttttcggcgg cattacattt tcacttcatt tcattgtcca  
44461 gtatgactac cgggcacat tgaccgttgg gcccctccc ttcaccaggg gagcactctg  
44521 tctgaaatag agagggaaag aaatgaaatg ggagccaaca tagtcactca gtcacttag  
44581 cagatagatt ttagtgtgtt ttctgttata aagattttaga gattattcca gaaatgaac  
44641 aaaatgaagg tctagtttga aggatctttt taatctattc aaactagtga tggaaatata  
44701 atccacagaa taactgctgg actttaacgt taaagtagga ttaatggagg cctgctttat  
44761 gaaatanmn nnnnntgaa agattgaaa aagtgtttaa ctaactgtag aaataaagca  
44821 gcatgttctg gcaggaagag tttctgttct ctttggatga tttctcatga acttgtctgt  
44881 gtctcctcat gcagtggtc atgttcccc caagctgaca gtgctgtccc cctccatgca  
44941 tgaggggaag gccacactcc tgtgtctggc caacaatggc ttccctcag gctggactct  
45001 gtcctggaag gtgggcagca gcagcatcag cagctggtgg gaggagacca gggcccccgg  
45061 ggtgctgcag aaggacggcc tctacagctg gagcagcacc ctgaggctcc ctgcagacca  
45121 gtgggagaag ctggactctg tgacctgtga ggccaccag gactccaga ctccagtcac  
45181 agagactctg tggagaaacc agtgttccca gtcaccacct gactgactgg aacaatatta  
45241 ttgtgttttt gcttttactg agatthcagc tgcattgatt tttttaatct tctttctttg  
45301 tgtgtctata aaacatthtt attagaagtt gttgtttgat actthctgca aaataaaaat  
45361 tactcttggg agttgtttca tttgtaattt ttacagata tgcattttaa ttaaacattt  
45421 tacattgatt aaatggtaaa atgcattttg tgggctacag tctagaccag gggcaccaca  
45481 agcagtcccc atggctgcct gtggggaaaa cttaaagcct ctaaaatgga tgccttaaaa  
45541 atatcacaga tcatgaggga attcaatata atthaaaaa gtttcattca tgttttgaag  
45601 aaattagggg tgcaatgaat aactagccac agttctgcac acacatggac cacagattcc  
45661 cctcccacc accacctgct ctgctgttc ttcatgtgca cctcctctt atcatttagg  
45721 tcaactgtct gttcacacca aacgcaatc aagcgtcaa atggcgtcca tggctttgt  
45781 ttcaacatgc atcaaagttg cagcttcagg tttctcctaa agtgttttca cctgaagctc  
45841 ccaccgctg tgggaggagc ttctgtcaaa tacttttctt gacttcatca ccaaggacac  
45901 ggatgatgag agatcaggtt tatgtatttt gaagagttct acaactgcat caatgagaag  
45961 cacacgtctc catgtgtggg ttcatgaaac cattcagtga ggagcagcag gtgggccgaa  
46021 ctgtggcggg aaaaagttgc tgctcctctg tactttttta ataaatata tttcaaggtg  
46081 caatgtcttt tttgtttgca gactcttttc acaaagtctg tgaaaaaatc ccagaaagta  
46141 tctaagctt tgttttagag tgcacttttc atctgtttca tgtttataca tgttttctt  
46201 gtcattactg ttgtgtaaat cattgattag aattgtggg aaaaagtcta ttgatgtg  
46261 agcaatcaat tcatagtgat aaaaatctca ctgctaatta ttattctcat tactattact  
46321 aaactagcct gtggtttagt tttttgggta atthgcagta aacaggtcct gagtagccct  
46381 tcatagcact cagatccatt tcagtcagac aactcttga gaagaatatt tagttcaca  
46441 catcttttag ttttcacaac atcttttaggt gtacattcac aacttgattc acaattctgt

46501 tttggcataa ggctctgttc aattccttga gataattatt ttttccttac gctttcgggt  
46561 aacaaaaccc ccaacaccaa tatcatccag aagaaaatgt gaatgtataa tcagtggtga  
46621 aataagatga ggtgtgtttt cggcggcatt acattttcac ttcattttcat tgtccagtat  
46681 gactaccggg caccattgac cgttgggccc ctcccgttca ccaggggagc atactgtctg  
46741 aaatagagag ggaaagaaaat gaaatgggag ccaacatagt cactcagtca ctttagcaga  
46801 ttagattttag tgtgttttct gtgttaaaga ttttagagatt attccagaaa tgaacccaaa  
46861 tgaaggtcta gtttgaagga tctttttaat ctattcaaac tagtgatgga atttaaatcc  
46921 acagaataac tgctggactt taaagttaaa gtaggattaa tggaggcctg ctttatgaaa  
46981 tagcactaga attatctaaa aacagtgatg gaaccggaaa ctaaagtatc agacataaat  
47041 atgtcagatt tcttgcattc aaggtgatgc tggctttgtt ggacatgcag ctgtctaagt  
47101 ctgacactgc agttttcctc atcagtcatt tgtgtggctt gatttaaaa agacttcaca  
47161 gattattttaa tccagattaa gattagaaac ctgaaaacaa ccataataga caaacagag  
47221 aacagaatcc aaaatttcta ttacttttat ttttctacag tcatgtctaa tttatttgat  
47281 taacataatt aagtaaatga gtttataatt atctttcaat attcaagga aaaaagaaaa  
47341 ataaaagact taaatgttta ggacctaat tttatttaat tgttactttt ttttgtatga  
47401 atccagataa attagaatgg atgcgatggc agcgtctccc acctttttga atggagtgag  
47461 gatcaaaaat gtaagctctg ttttttcatc tttacgtctc tttttttcca tccacccaaa  
47521 gttttcttag catctttgtt ttctctgaaa ctgaatcaat aaattcagaa agactctgat  
47581 tcttcaatat gtcagtgttg tctgtttta ttttcatcct aaatactttc tgaagtattt  
47641 gtctttgatc agagtcctcc agagaaagct gaggctggag ctgcttttat tgctgaagct  
47701 catctggaca acccgacct gagagaggaa gaagagggac tgggattcct catttttagc  
47761 ttttatttgt taaacttcaa gtaaatattt gtggttctta ttttgagtaa aggtgagtcc  
47821 agataaacta aattaatttt atatttatga aagacattga tgtattttgt gttttaagga  
47881 cagtttggtt tgttttctag tttagctggg gagttctgtt taagcttctg tttagcttga  
47941 agtatcttca aatgttcagt taacatattt tatggagcca atttagtaac tttaaacaaa  
48001 ctagtttagc tgtttttggg gaaataaaac aaaattttta agctgttgat agttcttaac  
48061 cacactgtta atctaaagag atatttctaa atattttcat aaagtttctt tgaattgtgt  
48121 ctttctttgt gtgttttagt tgtctacagt aaatcagtca gtgtttcagt ctctggaaga  
48181 acttgaggca gaaacattca aatgagtttc agttcattct gatgaaggag gttttgtac  
48241 gatgactttt cactgnnnnn nnnnnacaaa gaacatgaga tgctgaggag aaactcagct  
48301 gcactccaga tgattctcac atgacaccaa catcatcttc ctcacctga atgaagcaga  
48361 ggagagtcca gatgaggagc cagatcaaag tcatggtttg actgaggagg aggaggagga  
48421 tttctgtgtc ttctgtgtgt atgaaggaca gctgtcagtc atccagctct caactctcag  
48481 gactataaag tctcccagag cactggagca tggagctgct gatgcaaagt gtttctatgg  
48541 aaatgcaacc actgactcca acaggaacat ggatctctgt catcaggatt cacatcaatg  
48601 gatcaatcaa tcattccaga tgggatcca aaatattgat tgatattttt gcttgttttt  
48661 cactactaga acgtattaga atacctttg atctgcaaaa taagaactta agtgaaaaat  
48721 aagataaaaag ctgaagaaaa taaaaacttg cattattatt tctgtaagaa catttttctc  
48781 atcaatccgt tgtgttttcc agtcagactg tgttgagttt gttgtgttca aagtcagaga  
48841 gcgtgtctct ctgacgtcag aggtttttgt acgacgactc agttagtttg tatcactgtg  
48901 gtacacgttt ggtggaggaa ccagactgga ggttgattgt aagtaattta ttttcaattt  
48961 acatccatgt tttaaacaaa agtcttttct ttttaagtatc atgaaactaat atttgtctac  
49021 ttgtatgatt tatacagatt tagttttttc atataatgct caaacattc acagatgcag  
49081 ataatctga tccatttga aaatcattc tcagaaatct gtctgtaaat gtaatttat  
49141 agttttacaa cattttttca ttcagttata ccatctaaac cagtatttat atgttatttt  
49201 ttaaattttg tgttgaaaaa cataaaacct cctagttttt aagttgtaat aattctggaa  
49261 atggatgaat ttttttgtca tttcttaaag tttttcaaaa tacattttag atttttttta  
49321 ttaaagtaaa gtctgaaaat ataattgtgt gaatttttta acatctcaaa gtactcatag  
49381 gtgaatattg tgaagtaatt ataaaaaact aaaataaaca agacgtatca acgtcaaatc  
49441 attggtttta ttctcgtctc atgtaagaat ctgtgaactc tgttagatat cttaaactct  
49501 catgaatctg ctaaatcaaa catttgtcca cattttaaaa atattctttt aaaaaattat  
49561 cctgtttatt actcactaaa gaaaacaaaa aatgtggaaa aaataatgtt tttttctgt  
49621 gttgggttgt taaacgttaa gagaagtaag tttatatctc aaagatcttt ttcttatttt  
49681 acgttgagac tgaaacctgt ttgttgatgt ggttcattgg tgaagctcat ctggtgcat  
49741 ggttacagca cctaaagaag gaagtgaag attgaaaaaa gtgttaaact aactgtagaa  
49801 ataaagcagc atgttgctgc aggaagagtt tctgttctct ttggatgat tctcatgaac  
49861 ttgtctgtgt ctcctcatgc agtgggtcat gttccccca agctgacagt tctgtcccc  
49921 tccatgcatg aggggaagcc cacactctgt tgtctggcca acaatggctt cccttcaggc  
49981 tggactctgt cctggaaggt nnnnnnnnnn tctggaggag attcctgaaa atctgtttga  
50041 tgttatatag atcagagctt taggagcttc tccagatttc tgatggtacc aggcaagata  
50101 gtattgtgaa ccataatagt gatgtacttg ttgactggcc ttacagtcaa tagtgacctt  
50161 ttgattgagc tgcactgatt tagctgctgg ctgagtcaca acaacatttt gtccaacaga  
50221 acctgcagag agagaagaac cacaaagaac atgagatgct gaggagaaac tcagctgcac  
50281 tccagatgat tctcacatga ccaaacatc atcttcctca ccctgaatga agcagaggag  
50341 agtccagatg aggacgcaga tcaaagtcac ggtttgactg aggaggagga ggatttctgt  
50401 gtcttctgct gtgatgaagg acagctgtca gtcacccagt cttcaactct caggactata  
50461 aagtctccca gagcactgga gcatggagct gctgatgcaa agtgtttcta tggaaatgca  
50521 accactgact ccaacaggaa catggatctc tgtcatcagg attcacatca atggatcaat

50581 caatcattcc agatgggatt caaaaaatatt gatttatgct caaatataat attcgttttt  
50641 accactagta cctatttagaa tacctttaca tctgcaaaat aagaacttaa gtagaaatta  
50701 agctaaatctt agctgaaaaa ataaaaaacta ttgttattat tatttcagtg agaacctttt  
50761 tctcatcaat ccgttggtgt ttccagtcag actgtgttga gtttgtgtg ttcaaaagtca  
50821 gagagcgtgt ctctctgcag tcagaggttt ttgtacgcag actcagttag tttgtatcac  
50881 tgtgggtggac gtttgggtgga ggaaccagac tgggaagtga ttgtaagtaa tttattttca  
50941 atttacatcc attttttaac aaaaagtggt ttctattaag taccataaac taatatttgt  
51001 ctacttgtat gattttcaca gatthagttt tttcatataa ggcaggaaac attcacagat  
51061 gcagataaac gtgattccat ttgaaaatca tttgtcagta atctgtctgt aaaggtgaat  
51121 ttatagtttt ccaacaattt ttcatcctaa tataacatat gaaccagtaa ttttatgtca  
51181 catttacaat tttgtgttga gaaaaaatga aaacttccga gttttaaagt tgtaaagatt  
51241 ctggaaacta actgatattt tgccatgttc taaagttttg gtaattgtat ttttctttta  
51301 acatgatttt tttaacatct caaaggactt cttgggtgagt attgtgaagt aatatataaa  
51361 attaaagtaa aaaagacact ccaacatcag catcactgag gtcataattg tgctgtgact  
51421 ttgtaaacca gagtccatag caaatgtgtt ttactaaacg tatcagttta aatcttttct  
51481 cataaaattg ttgtcagcac aatgtcagta tttttggctt taaaaaacac tttaaacaat  
51541 agtttgatgt tcattataaa aataaaatgg ggctaaaatg tttgcaact tgatgtgttt  
51601 ctttttaaaa atgtaaaatg tatttaatta atgaatggtt tactatcaat gataaattta  
51661 gggattttta ttctgtctta tacacctctg aatgttttcc tgatgagaaa cgttacaaaa  
51721 ctttcttttc acatcttaat attccgacag ttgaaccaga tgtggctgct ctattggata  
51781 agcctttcac tgctgaagaa ctaaagaatg ctgtcatgtc tatgcaggat gggaaaagcc  
51841 ctggctcttag gtttcccatt ttaattttt aaggttttta tggataaac atctcctcta  
51901 atgcttaaca tgttaaaggc tccagcagat cttgggtgcct tgccggccac tttgagcag  
51961 ccacaatctc tcttatccta aagaaagata aagatctgcg atgctgcagc agatataaac  
52021 ctctatcttt gctgtgtgca gatgttaaca ttttagcaaa attgctagca aaatgcttgg  
52081 agctgataat tcccacatta atcagtcctg accaaactag ctttattaaa accagacata  
52141 tcataatatt aggcggctta tgaatattta tactgcacct ctccaactag caccctcgaa  
52201 atggctcatct ccatggatgc tgaaatggcc tttgatggg tggagtgcc ttacctgttt  
52261 tgtactcaga gacgctttgg ctttggatct aaattcctat catggatcaa attactgtac  
52321 acatcaccta tgacacgtgt tcacactaet aatgactact tgaataactt ccccttgggc  
52381 cgtagaacta gacagggctg tctcttccc cctctttat ttgctctagc catcaaacca  
52441 ctcacggcgg ccattagaac tagctctatg tgcggtatct tgaaggggtg gtgtagatca  
52501 taaagtagcc ttatatgcag atgacctttt attatttctt tcagatccag ctgtctccat  
52561 gcctccagtt ttagctctgc tgagggagtt tggtcagatc tctggctaca aattaaacct  
52621 aaataaaagt gaacttttct ctgtcaatcc tgaggccccc ccaatcagac ctacctttta  
52681 aaatctctcc atgtgtcatt aagtatctag gcgttagagt gactaaggc ttttctgatc  
52741 tttcaaaccc aactttaatc cattaactga tcaagttaat tgtgacttac agcgttggtc  
52801 tatgctgcca ttatctctca cggataaaat aggcctgcatc aaaattaatg tgctgcttaa  
52861 acttctctat ttttttcaat gtctaccagt attcattcca atccaaattt caggtccctt  
52921 gacaattcta ttgccaatt ctagcctcca aggatgagaa aaactatatt gcggaaaagc  
52981 aatgataatg gcggcctaca ggagctgcag cagcacaact ctggaataaa gactctacac  
53041 tcagtcactt tagcagatta ccgtacattt gtgttcagat atccttgtaa taagttagat  
53101 gttaaactag aaatgaaaca ttattaacgt ctagcttgaa agaaattttc gatgtatttt  
53161 gctttatctg ctattcatat ctgagaaaat atttgtgtct aaatgagttt catttttttg  
53221 tagtaaagct taaatttgca aatataattta taaaaatgtt ttattgcccag tgatatggac  
53281 caatggctca acccaacatg gtttctaaat tcaacttttg ctgaattttt cttaggttga  
53341 gaaaagcaaa ctccagtgag ctccagagagt tgaataacat cagacatcat ctgtctagtg  
53401 tagaaatgtc tacagagcag aagcacagaa gtatttgttg gagaaaatac ataaatgttg  
53461 tggttattga tatatgcaaa taaaatattc tgaatccttg tttcaagctt tttaaatgta  
53521 aggatgatga actcatgagt ccttagaacc accaggagtc tgtagcagag aaaaatttct  
53581 gtctttttca gatgttttaa attcagtga aaacactaat taaaaacatg ttccatccat  
53641 ccatccatcc atccatgttg tcatgagtgt tatgtcccca ggccttttgg tgtgtatatg  
53701 tgtgtgtgtg tgtgtgtgtg tgtgtgtgtg tgtgtgtgtt ttgggatgta acaatgagag  
53761 ttttcccac cactttttgg ttgaaggtag aggacatcct ggatggggga acagttcatc  
53821 acagggcaag acaaccacac actcacatct agggacaatt tattctgagc aaccaacatg  
53881 tgatgcacag tcttgactg tggagaagag atgtttctgg aataaagact agttattgaa  
53941 acgttttct acatttfaat tgattatctt ctcaataat ggttaatcgg tctgagact  
54001 gagagggatg ggggtccaatt ttgtctgtca accaattcta tgactatgat tttagattc  
54061 ttttaatagt ttttaagagt ttccatggtc tttagttctt ttttatatca gacttgcttt  
54121 taactgatga acctcccaa gcccttaggt cctcaggtgc agccctgctg aaggtcccta  
54181 gggtcaggac aaaaaaccac ggcgaggact cgttttagatt ctacgggctc cgtctgtgga  
54241 acagcctacc tgaggatgtg agggcctcat ctactgttga ggtttttaaa aagaaattaa  
54301 agacacacct gtgtaactca gcttttaatt aaatttcata acttttctaa gctagaattt  
54361 tcatttttta ctcttctgt ttatgatgtt ttattgcata attttattgt tttattgtt  
54421 taacttagaa tttttactat taatttctg atattttaac acatgtatat tttttaaag  
54481 tcttttagcc aatttagactg tttacagtg ttttctcacc cttggctggg gtgtttgtgt  
54541 ctgtgctgac acccaacggg aggtcagggc agacgggcct ttctggttct tttcttctct  
54601 tttacttgtg tttgtttttg tgaatttatt gtgcagggct tatttaatta ttttatgca

54661 tgaatgggga ttggtgtttt ctacattctt gtttgttttt atgttcagca ccatgaactg  
54721 tttttttaca tgaaagggtc tatagaacta acaataattht aaaagtgaat ttaaattgatt  
54781 ttttttcatta gcagatctaa tagattcatg aaacagtgtg acttagttht tgtatggcat  
54841 gttttagcaa ataagtgatt ttctgaagat aaatctcaga cagaagthta tattaagaca  
54901 gaagttaata ttaataaata tccatcccc attattht agt aaatattag atcattattg  
54961 acaaaaactt tagtaaaaga acctcagata aagggtactg tgcttaaaata ttgtgtcttt  
55021 ctttgtgtgt ttagtgtgtc tacagtaaat cagtcatgtt ttcagtctct ggaagaactt  
55081 gaggcagaaa cattcaaatg agtttcagtt cattctgatg aaggaggttt ttgtacgatg  
55141 acttttctact gtgtgaacac atcctgactg ttgatactgt gataactctg acagtaataa  
55201 actcctgaat cttcagcctg gactccactg atgggtcagag tgaagtcaat tccatttctt  
55261 gatccacttc cactgaaatc ggaggagatt cctgaaaatc tgtctgatgt tctccggatc  
55321 agagcttht agagctthtcc agatthtctga tgggtaccagg caagaaagta ttgtgaacca  
55381 gaatagtgtg ctacttgttg actggcctta cagtcaatag agaccttht attgagctgc  
55441 actgatttht ctgctggctg agtcacaaca acatthtctc caacagaacc tgcagagaga  
55501 gaagaagcac aaagaactg agatgctgag gagaaactca gctgcactcc agatgattct  
55561 cacatgacac aaacatcatn nnnnnnnnc ctgaatgaag cagaggagag tccagatgag  
55621 gagcagatg aaagtcatgg ttgactgag gaggaggag aggtthtctg tgtctctgc  
55681 tgtgatgaag gacagctgtc agtcatccag tcttcaactc tcaggactat aaagtctccc  
55741 agagcactgg agcatggagc tgcctgatgca aagtgtthtct atggaaatgc aaccactgac  
55801 tccaacagga acatggatct ctgtcatcag gattcacatc aatggatcaa tcaatcatc  
55861 agatgggatt taaaaatatt gatttatgct caaatataat attcgttht taccactagt  
55921 acatatgaga gtacttctga aaagaaaaaa ttaagctaaa ttaactgaa aaaaattaaa  
55981 agtattatta ttagtatttc tgtaagaaac ttttctctcat caatctgttg tgtttccag  
56041 tcagactgtg ttgagthtgt tgtgttcaaa gtcagagagc gtgtctctct gcagtgcagag  
56101 gtttttgtac gacgactcag ttagtthtga tcaactgtgt acacgtthtgg tggaggaaacc  
56161 agacaagatc ttggaagtaa gtttctaaaa acatthtata aaaaatgaaa ctcaattgct  
56221 cttattattht taaagaaatt aaagagtcta gaaaaatatt tatatttht ttttacctt  
56281 tttcaatgtht tcagctccta aattatgtht aggtthtct ttaaaaaaa tttagatct  
56341 taaataactt ttattagtga gcatctcata tgaattthcaa aataagatac ttatacaatg  
56401 ttttttgcct taaattthtcc ttaaacgta aactcttht ctgtcttht tggccagata  
56461 gagthttht caattcagta ttttgacaaa ataattthaa agthttht agthtctac  
56521 atthtctaaaa tctgcattaa cctctctctg ggtcacgggg ttgacaaaacc tctthtctcagc  
56581 aactcttht ttttttht ggcataaaga tgtthttht ttacattagt ttatgttht  
56641 gaccgatctc atgatcttaa aatgtthtca gtatattgt tcaaatgtc ctgaaataat  
56701 tgaacaaaca tgaaaatgat gtatcttcta gtttgaactg tcatthtggtc caaagagcgt  
56761 ttgtctctcat gaggactctg tgtgctgatc tgcagagag ctttctgaaa ggaagtgaaa  
56821 cagtgtgtga gtagtgact gatggagcag aaactaacat ctgacagaaa cttctcaag  
56881 gagaacatca acgttcacac agtcaaggag tttgattgac agctgtgtgc tctctgtct  
56941 ctaacctgat ggtgtctctc aggtgatgtc cgtcccaggc tgacagtgtc gtccccctc  
57001 atgcatgagg ggaaggccac actcctgtgt ctggccaaca atggcttccc ttcaggctgg  
57061 actctgtcct ggaaggtggg cggcagcagc agcatcagca gcagctggga ggagagcagg  
57121 agccgggtgc tgcagaagga cggcctctac agctggagca gcacctgag gctccctgca  
57181 gaccagtggg agaagctgga ctctgtgacc tgtgaggcca ccaaggactc ccagactcca  
57241 gtcccagaga ctctgtggag aaaccagtgt tctagtac cacctgactc actggcaat  
57301 attattgtgt ttttgccttht actgagattt cagctgcatt gattthttht atattcttht  
57361 tttgtgtgct ataaaaacat ttttatcatg agttacttat ttgatactth ctgcacaata  
57421 aaaaatactc tcaaaagtth tttcattgtg gattthtcaac aaatataat atthtthttht  
57481 agacattht atcaataaat ttgtaaaata atthtccagaa cttctatgtht gctgttgcat  
57541 tgatggagtht catcctgtta ctgtcagata aagttaggct acagthtata ctgggggtca  
57601 ccaacgcagt gccatgggg gcaactthaa gcatcagcaa ggcagctctc aaaaatata  
57661 cagatcatga gggaaattcga tataatttht aaatgttht tttthtccgt ctgacaagaa  
57721 gattgatgat tctctggct tcaaaattgt tgatctattg aaccaccagt acaactagt  
57781 tccctgctga ctttctaath tttcagcaga taaacagaaa taaatcactg tttthttht  
57841 atacgtgtht tctthtctat tactgtgtg taaatgaggt tgggtgatccc tgatctcggc  
57901 agtaatacat ttattthtct tttthtctcc tgatgaattg atgcagacac tttgatggaa  
57961 tgtaaatgtag tgaatgtaca gttgttagat cgctgthaa gttgtctcc taaaaaaaca  
58021 cacaaacat aatgtctgaa cctctgtht caaagtgaag aacataaaat ggtthttht  
58081 gtgtctaaat tgttctcagc taagcattgt ctatgaagac tctcattcat ccaggthtgg  
58141 tccatcatag tagtagtht agaggatgtc atctggacct ggtthttht ttagaagacg  
58201 tttcacctct tatccaatag gctthtctca tctgthttht gttggctgaa gagctgtht  
58261 atatgcgctc atgggggagg agtcagacct gagatccagg tggaaactggt tctgtthttht  
58321 taggthtctcag aacctgccg tagatggatg gaagaataaa cctgagacca ccattcttht  
58381 taagagaagg tttatcctc ttgacaaaaga tgggtcttht cactctcact tcaactctc  
58441 cttctatct ggctagaath cggactcact tgcctcagaa ctagtthttht tggcctc  
58501 ggtggaggtg cactgcagac tcaagthtccat ttgggttht tctgcagatg tggtaagcc  
58561 gctthttht taggthttht gtttctccta tagactgttc tttcagtht tctthttht  
58621 tgatagagtht cacaccatth ctctgttht agctaggaat tthtctcttht gaatgaagaa  
58681 gttthttht gagagthttht actgthttht gatgaactgg gatthttht thtthttht

58741 tccttttttag tttttcagac aggcctgaga tataggaat aaccagctaa ttcagaattg  
58801 acaaagcctc ttggataaga ggtgaaacgt cttctaactt taaaaactaa ttctagatga  
58861 cagcctctaa acctactaca atgcctgcta agcattgttt tcctttggta gattcattga  
58921 tgttagaaga tcaaaaaat tatgggaaa tccacatttt caccaaaaag gttgagagca  
58981 gctgttcatt cagatcagtt cctctttagc tgaaagaggt ttttgtacga cgttgtttca  
59041 ctgtgtgaac ggaaagctgt tgctctgctg acagtaataa actcctgaat cttcagcctg  
59101 aactccactg atggctcagag tgaatcact gccagatcca cttccacgaa aacgatcaga  
59161 aactccagac tgacgagttg ttgcataata taccaggagt ttaggagctt ctacagattt  
59221 ctgtagatac cagtgaaggt tgggtgctaac acttgaactg gtttgacatc taatggagaa  
59281 agtttctcct ggaacaacag acttagatcc aggagtctga gtcaaagtga tttcacctga  
59341 tgaacctgga aaaaaggaaa aacagaagag tcattgagat gaatccagat gaaagaaatc  
59401 taagaattgt gatgaagttt gtttctgat gaatccaagt ttccagcaga gagtctcacc  
59461 ctgaacatgg agctccagga cagccagcag cagagtctgt gacatcctca ttgtgctgca  
59521 ggtgtgtcag tgtctctgaa aggtctggac agccactgat caacactgag ctcttaactg  
59581 ctggaagcag agaggcagca cacatagcga aacacactga gtcagtcac tgcagctgtt  
59641 ctccagcagc ctggatgttc agcttggaaat ctttggccta caggagctgc agcagcacia  
59701 ctctgggata aagactccac agttagtcac ttttaacatt tgttttcaga tttcactgtt  
59761 aataagttga tttttacaac agaaatgaaa cattattaaa gtctagtttg aaggatattt  
59821 tcaatgtatt ttactttatc ttctattcat aactgagaat atatttttgt ctaaagtgtg  
59881 ttttaggtaa taaagcttaa atttgcaaat atatatgat ataaaattgt tttaatagca  
59941 gtcataatgga ccaatggtta aacccaactg agtttctaaa tgtacttttg tctgaatttg  
60001 tcctaagttg ggcaaaagcaa actccagtca gcttagagag ttgaataaca tcagagatca  
60061 tctgtctagt gtagaaatgt ctacagagca gaagcacaga agtatttctg ggagaaaaata  
60121 cataaacgct attgatata ctagataaaa gattctgtat cctggtttca agctcttaa  
60181 atgtgaggat gatgaactca tgagtcctta gaaacaccag gagtctgtag cagagaagat  
60241 tttctgtctt tttcaaatgt ctataaatcc atccatccat ccatccacc tggatgggccc  
60301 accagttcat cacagggcaa cacaaccaca cactcacatc tagggacaat ttattctcag  
60361 caaccaacat gtgatgcaca gtccctggact gtggaagaaa gatgtttctg gaataaagac  
60421 tagttattga aacgttgttt tacattttaa ttgattatct tctcaataat tggttaatcg  
60481 gttctgaagc tgagagggat ggggtccagt ttttctgtc aaccaattct atgataatga  
60541 ttttaaatct cttttaatag tttttaagag tttccatggt cttagttctt cttttatct  
60601 agacttgctt ttaactgatg aacctcccaa agcccttagg tctcaggtg cagccctgct  
60661 gaaggtcctt agggctcagga caaaaaacca cggcgaggac tctgttagat tctacgggccc  
60721 tctgtctgtg aacagcctac ctgagtatnn nnnnnnnnnn nnnnnnnngg aaaaacagaa  
60781 gagtcatgta gatgaatcca gatgaaagaa atctaagaat tgtgatgaag tttgtttcct  
60841 gatgaatcca agtttccagc agagagctct accctgaaca aggagctcca ggacagccag  
60901 cagcagaatca agtgacatcc tcattgtgct gcagggtgtg cagtgtctct gaaaggtctg  
60961 gacagccact gatcaacact gagctcttaa ctgctggaag cagagagcca gcacacatat  
61021 gcaaacacac tgagtcagtc atctgcagct gttctcagca gctctggatg ttcagcttgg  
61081 aatctttggc ctacaggagc tgcagcagca caactctgga ataaagactc tacactcagt  
61141 cacattagca gattacattt gtgttcagac aagagtgtta aagagtcttt taattacaga  
61201 taagagtgtt ttggccttta cggatagaca ctttcttcaa agggcagccc ccccatcgct  
61261 gatcattctt cacaaataaa ataatttatg tgtgcctatt ttagtgaggc atgtggctaa  
61321 aattaaggct aattcaaac aaggttgttt taactatttg tagtccctc acagatgacg  
61381 gtttaggagc taaaaagcaa aacgttctag tcagaagctc cacctcagta aagggttag  
61441 atctgaaaga gaacagagtt ttagataaag agcttctctg catttacagg ttaggagtt  
61501 aaagaaagtc gtccctccaa agctaaaagc tctccatggt ttgctggttt agaagcacia  
61561 agaggtaaat cttcacattt ctaagatcct ccacagctac agcatcagga gctggaaaag  
61621 cacaaaactg tgagctctgaa gctctgtcag tgctttgggt tttggagcac aaacatcatc  
61681 cagttttgtc agctcctcca cacttacggg atcaggagct gacaaaatg gatcttaaaa  
61741 gtcagaaact tctccacaat atgagtttag gagctaagag atggaacag tccactgatt  
61801 tcaaggggtt tacatttata gaggactctt cctgatttct gtcctttgat gctcatcagt  
61861 gaaaattctg taccaaaagc cccagagaca ataaaatcag attatcttta actgtaaaaag  
61921 gtttggtaga ctgtggtcaa tctatcaagt cacatgatca ttttcatgga gatgagtaac  
61981 tttaatctac aaactaaaaa aggtcaaaaa gtgtcactga agatgtttct gacaaaagaa  
62041 gatcctggaa aaaagactct acagtatttg aatggtgatg ttaaattgtg ttgtttctct  
62101 cctaaaatag agtaaacctt tctttaggaa taaaccaa atgtttcata ataaatccaa  
62161 tacatttaat aaactgttta ctcatgtgat catttcaatt gggatgagtc attttaact  
62221 gcagacaaaa acacatataa aaagtgtcac tataggtgtt tctcaccaga aaaaggggct  
62281 aaaatgttat ttcttttcat tgtttgtat aatttatgag aaattacact attgcattaa  
62341 gtgtctttga atgtgtctt tctttgtgtg tttagtgtgt ctacagtaaa tcagtcagtg  
62401 tttcagctctc tggaagaact tgaggcagaa acattcaaat gagtttcagt tcattctgat  
62461 gaaggaggtt tttgtacag gactttctac tgtgtgaaca catactgact gttgactg  
62521 tgataactct gacagtaata aactcctgaa tcttcagcct gactccact ggtgctcaga  
62581 gtgaagtcann nnnnnnnnnn nnnnnnnnnn nnnnnnnnnn nnnnnnnnnn nnnnnnnnnn  
62641 nnnnnnnnnn nnnnnnnnnn nnnnnnnnnn nnnnnnnnnn nnnnnnnnnn nnnnnnnnnn  
62701 nnnnnnnnnn nnnnnnnnnn nnnnnnnnnn nnnnnnnnnn nnnnnnnnnn nnnnnnnnnn  
62761 nnnnnnnnnn ngagtcacaa caacattttg tccaacagaa cctgcagaga gagaagaacc

62821 acaaagaaca tgagatgctg aggagaaact cagctgcact ccagatgatt ctcacatgac  
62881 acaaacatca tcttcctcac cctgaatgaa gcagaggaga gtccagatga ggacgcagat  
62941 caaagtcatg gtttgactga ggaggaggag gaggatttct gtgtctctcg cagtgatgaa  
63001 ggacagctgt cagtcatcca gtcctcaact ctcaggacta taaagctcgc cagagcactg  
63061 gagcatggag ctgctgatgc aaagtgttcc tatggaaatg caaccactga ctccaacagg  
63121 aacatggatc tctgtcatca ggattcacat caatcattcc agatgggata ttttttattt  
63181 tgattaatgc tcaaatataa tatgctgttt tcaccactag tacgtattag actatacctt  
63241 tacatctgca aaatatgaac ttaagttagaa attaagctaa atttagctga aaaaaaacta  
63301 ttattattag taactatggt aacatggtag aatactttct atctacaaaa taaaaacata  
63361 aataaaaaat tagctaaaact tagttaataa atatattata gatgtttttt atttctgtaa  
63421 gaaccttttt cacatcaatc agttgtgttt tccagtcaga ttgtgttgag ttaagtgtgt  
63481 tcaaagtcag agagcgtgtc tctctgcagt cagaggtttt tgtacgacga ctcagttagt  
63541 ttgtatcact gtgggtgact tttgggtggag gaaccagact ggaggttgat tgtaagtaat  
63601 ttattttcaa tttacatcca tgttttaaca aaaagtgat tcttttaagt accataaact  
63661 aacatttgtc tactttgtagg atttttacag attttagttt ttcataataat gcaggaaca  
63721 ttcacagatg cagataaacg tgattctatt tgaaaatcat ttgtcattaa tctgtctgta  
63781 aaggtgaatt tatagttttc caagtatacg gaactttgaa aatataatg tgtgagtttt  
63841 aaaactctc aaaataactc taggtgtgtt ttttgaaagta atcaaaaaaa taaagtgaac  
63901 aagacgtatc aacgtcaaat tgttgctttt attctcgtct catgtcagaa tctttaaact  
63961 ctgttagata tttttaacct ttaatctggt tcagcaaatg tttgtcagat ttatgacaaa  
64021 atccttaaaa aaatgatattt attaatttgt caccaaggaa aatcagaac atgaaaaaat  
64081 aaatgttttt tttctctgtc gggttgttaa aacttaagtg aaataagttt atatcttgaa  
64141 gatcgttttt ttattttacg ttgagactga aacctgtttg ttgatgtggt tcatttggtga  
64201 agctcatctg ttgccatggt tacagcacta aaagaaggaa ctgaaagatg gaaaaaaaaa  
64261 atgttaaaact aactgaagaa atgaagcagc attttgctgc aggaagagtt tctgttctct  
64321 ttggatgatt tctcatgaac ttgtttgtgt ctctcatgc agtgggtcat gttccccca  
64381 agctgacagt gctgtcccc tccatgcatg aggggaaggc cacactcctg tgtctggcca  
64441 acaatggctt cccttcaggc tggactctgt cctggaaggt gggcggcagc agcatcagca  
64501 gcagctggga ggagagcagg agccccggg tgctgcagaa ggacggctc tacagctgga  
64561 gcagcacctc gaggctccct gcagaccagt gggagaagct ggactctgtg acctgtgagg  
64621 caccaccagga ctcccagact ccagctccag agactctgtg gagaaaccag tgttcctagt  
64681 caccacctga ctgactggaa caatattatt gtgtttttgc ttttactgag atttcagctg  
64741 cattgatatt tttaatcttc tttctttgtg tgctataaaa acattttgat taaaagttag  
64801 ttgtttaatg ctttctgcaa aataaaaaaa tactcttaa tgttgtttaa tttgtggtt  
64861 ctaacaaatt gatacatttt aattaaaaa tttacattaa ttaaagtca aaataaatgt  
64921 ttgaacttct tagttcctgt tgcattgatg gagtccatcc tgttactgtc agataaaggt  
64981 gggctacaat ctagaacagg ggtcaaagc gccagcttca aaaaatacat atttttat  
65041 acatttttgt gtttataaag gaaaataacta acattatcat ctgtcagctc aaagacttag  
65101 ctgctccaca ctttaagtta tcttcagtaa catcaggatt acggaggca tgtgtgagaa  
65161 gtttgatttg aatttattga atgcatcaat tcttgcaaaa tcatttttat tccaaaattt  
65221 ctttatcaca aacacagatt tttagttcta aaaagatact ttattcatag tttgatgttc  
65281 attaaagcaa aaactggaaa gggaggtttt gtaactgat atattttttt ttatttgac  
65341 aaaatgaaaa caaatcaaat caatgtatag ttttttattt ataacaatga gatttttatc  
65401 aaaagtattt tagtaaacct agttatttta ggttgagagg agctgttcag tcagatcagt  
65461 tctcttttag ctcaaagagg tttttgtacg acgttgtttc actgtgcgat tggaaagttt  
65521 gcaccctgct gacagtaata aactcctgaa tcttcagcct gaactccact gatggtcaga  
65581 gtgtaatcac tgccagatcc acttccacga aaacgatcag aaactccaga ccttcgggtt  
65641 gttgcagcat atatcaggag tttaggagct tctccagatt tctgaagata ccagttgagt  
65701 aggccactaa cacctgaact ggtttgacat ctaatggaga cagtttgtcc tggacaaca  
65761 gactgagatc caggagtctg agtcacagtg atttcacctg atgaacctg aaaaaaggaa  
65821 aaacagaaga gtcattgaga tgaatcctga tgaaagaaat ctaagaattg tgatgaagtg  
65881 tatttctga tgaatccaag tttccagcag agagtctcac cctgaacaag gagctccagg  
65941 acagccagca gcagagtcag tgacatcctc attgtgctgc aggtgtgtca gtgtctctga  
66001 aaggtctgga cagccactga tcaacactga gctcttaact gctggaagca gagaggcagc  
66061 acacatatgc aaacacactg agtcagtcac ctgcagctgt tctcagcagc tctggatgtt  
66121 cagcttgga tctttggcct acaggagctg cagcagcaca actctggaat aaagactcca  
66181 cactcagtca ctttagcaga ttacatttgt gtttacagtg ttaaagatc tctgatcac  
66241 agatgagaag aattctttta acttaactct gtgatagct ggtcggttga aaagttcgtc  
66301 ctctccaggt ggaggacttg aagtatcttg gggttttgtt cattagagcg ggaaaatcag  
66361 agcgggagat taaaagctgg aatgtagcgg cgtctctgtc atggctcgac aatagttcgg  
66421 agtgacccaa cagcggcgca gcagaattcc agaggtgaga cggcgtgaga tcaaaggaca  
66481 gcgaccaggt gagatccata gtagatattt cctgaggcaa agacgagagg agcaattagt  
66541 aatatgaagc ttggcaaac aaacaggaa atgagcagc cagactaac accgtgggag  
66601 gaacaacgaa ctgacgtcga gtggaggtcc agatgctcct taagaggcaa cggcgggtgat  
66661 gaaggttaagt ggcagcagct ggtcctgtcc agaacagagc aggtggggga tggggagagt  
66721 agctggcata ggcaccatat cagtacctcc ccctcaacga ctgccacgag gcggctcttag  
66781 acgtcggcca ggatggcggt ggtaaaagt ctcgatgaga gtatggcca gaatgagga  
66841 acggaagatc catgaatgtt cctctggacc atacccttc cagtcacca agaactgcac

66901 cccccgccca cggcgccgga tatccaaaat cctactgacc gttaaggccg gggcgccgtc  
66961 gatggtacgg gcgggtggtg ggggaagagga atgtgggcaa agcagactct cagtgactga  
67021 cttagctagt gaaacgtgga atgtgagatt caccttgagg gcagcaggga gacgtagcct  
67081 gacacaaca agattgatg cacggcctat ggtgtagggg ccaatgaact tgggagccag  
67141 tttctgggac aggcctgtag aggaatgtta tgagcggata ataccagacc atctggccag  
67201 gctggtagtt gggactcacc acccaatgac ggttggtat atgacagtgt ctctccttgg  
67261 tgcggaggag agccgccccg gtctgcagcc agatgtcccg acaccgctgg aggtgaagct  
67321 ggaccgaggg cactgccaga tccaattcct ggggaaggaaa caaagggggt gagtagccca  
67381 aggaggcctc aaaaggtgat attccgggtg cagtagagga atgggaattg tgggcatact  
67441 ccaccacac caggtatttg gaccagtcct cctgattctg ggcctccaga catctaagat  
67501 cgcctccag tcctcgtta gaccgttctg cttttccatt ggcctgagag tggctacatga  
67561 aggtaaggct gacagtagct ccgagccggg agcagaaggc cttccacact tgggatgtga  
67621 attgcggtcc gcggttgac acaatgtcgc tgggtacccc atgatggcgg aaaacatggt  
67681 ggactagggc attggcagtt tccatggcag agggcaactg aggtaggggg ataaattgag  
67741 cggcttttga aaaacggtca atgactgtga gaattacgt atggccttga gacggtggaa  
67801 gcccgataac aaaatccacc gcaaaatgtg accagggacg gctaggggtg gatagaggca  
67861 gtagatgacc agagggaggc ctggttgaga ctatgacaga gtgccagtag gacaggaagt  
67921 tctggcagg atctcacct gagcttctg gactttgctc tcgatctccc aggtgagatt  
67981 tctaataaaa caggacgtag gaaggatgga agagttagag ttggattcca tgggtggaata  
68041 gttgcgggac aaggtgtcag gcttaacatt acggctgctg gggcggttaa gtgatcgtaa  
68101 agtgaaaact gtcgaaaaac aaacaccacc gggcctggcg ggagtttaag cattttgcgc  
68161 tgcggagata agcgagattc ttatgatccg tccacactat gaatggttgt tctactcctt  
68221 ccagccagtg gcgccattct tccagggcta acttaatcac caataactca cggttgcccc  
68281 catcatagtt tgctccgccc gggcttagtt tgcgggaaaa gaaagcgcag ggttgagct  
68341 tcctgtgct gtcttcccgt tgagacagaa ctgccccat accggaatct gaggcgtcca  
68401 cctcaacaat aaaatgcttg gtgacgtcgg gttgaataag aatgggggct gaaacgaaaa  
68461 gagatttaag tttcttgaat gcagaatcgg cagcagggtt ccaagaatag gttttattga  
68521 tggaggtgag tttagtgaga ggtgccgcta tactgctgta gttacggata cagcggcggg  
68581 aaaaatttgc gaaaacccaa gaactggttg agctttttac gggctctgggg aacttcccac  
68641 tggcgtagcg cctcaatatt agcagggtcc gggcgtagtg tgccagctta aatgattac  
68701 cccaaaaaag ggacggtgga gacatggaaa tcgcactttt cagctttgac atataattg  
68761 ttaaccaata acctttcaag gacgaaacga acatggtggt catgctggga ggaattggcg  
68821 tagtaaatga ggatgtcgtc caattataca aagacaaatc tgtaagga atcccgcacg  
68881 acatcatcta ctaagcgttg gaacactgcg ggggcgtttg tgaggccgaa cggcatgaca  
68941 agatattcgt aatggcctag tggagtgttg aatgccatct tccattcatc cccatctcgg  
69001 atacgcaaga ggtgataagc attacggaga tcgagtttag taaagatctt agcttgttgg  
69061 actgagctca acacggaatc aatnnnnnnn nnnnnnnnnn nnnnnnnnnn nnnnnnnnnn  
69121 nnnnnnnnnn nnnnnnnnnn nnnnnnnnnn nnnnnnnnnn nnnnnnnnnn nnnnnnnnnn  
69181 nnnnnnnnnn nnnnnnnnnn nnnnnnnnnn nnnnnnnnnn nnnnnnnnnn nnnnnnnnnn  
69241 nnnnnnnnnn nnnnnnnnnn nnnnnnnnnn nnnnnnnnnn nnnnnnnnnn nnnnnnnnnn  
69301 nnnnnnnnnn nnnnnnnnnn nnnnnnnnnn nnnnnnnnnn nnnnnnnnnn nnnnnnnnnn  
69361 nnnnnnnnnn nnnnnnnnnn nnnnnnnnnn nnnnnnnnnn nnnnnnnnnn nnnnnnnnnn  
69421 nnnnnnnnnn nnnnnnnnnn nnnnnnnnnn nnnnnnnnnn nnnnnnnnnn nnnnnnnnnn  
69481 nnnnnnnnnn nnnnnnnnnn nnnnnnnnnn nnnnnnnnnn nnnnnnnnnn nnnnnnnnnn  
69541 nnnnnnnnnn nnnnnnnnnn nnnnnnnnnn nnnnnnnnnn nnnnnnnnnn nnnnnnnnnn  
69601 nnnnnnnnnn nnnnnnnnnn nnnnnnnnnn nnnnnnnnnn nnnnnnnnnn nnnnnnnnnn  
69661 nnnnnnnnnn nnnnnnnnnn nnnnnnnnnn nnnnnnnnnn nnnnnnnnnn nnnnnnnnnn  
69721 nnnnnnnnnn nnnnnnnnnn nnnnnnnnnn nnnnnnnnnn nnnnnnnnnn nnnnnnnnnn  
69781 nnnnnnnnnn nnnnnnnnnn nnnnnnnnnn nnnnnnnnnn nnnnnnnnnn nnnnnnnnnn  
69841 nnnnnnnnnn nnnnnnnnnn nnnnnnnnnn nnnnnnnnnn nnnnnnnnnn nnnnnnnnnn  
69901 nnnnnnnnnn nnnnnnnnnn nnnnnnnnnn nnnnnnnnnn nnnnnnnnnn nnnnnnnnnn  
69961 nnnnnnnnnn nnnnnnnnnn nnnnnnnnnn nnnnnnnnnn nnnnnnnnnn nnnnnnnnnn  
70021 nnnnnnnnnn nnnnnnnnnn nnnnnnnnnn nnnnnnnnnn nnnnnnnnnn nnnnnnnnnn  
70081 nnnnnnnnnn nnnnnnnnnn nnnnnnnnnn nnnnnnnnnn nnnnnnnnnn nnnnnnnnnn  
70141 nnnnnnnnnn nnnnnnnnnn nnnnnnnnnn nnnnnnnnnn nnnnnnnnnn nnnnnnnnnn  
70201 nnnnnnnnnn nnnnnnnnnn nnnnnnnnnn nnnnnnnnnn nnnnnnnnnn nnnnnnnnnn  
70261 nnnnnnnnnn nnnnnnnnnn nnnnnnnnnn nnnnnnnnnn nnnnnnnnnn nnnnnnnnnn  
70321 nnnnnnnnnn nnnnnnnnnn nnnnnnnnnn nnnnnnnnnn nnnnnnnnnn nnnnnnnnnn  
70381 nnnnnnnnnn nnnnnnnnnn nnnnnnnnnn nnnnnnnnnn nnnnnnnnnn nnnnnnnnnn  
70441 nnnnnnnnnn nnnnnnnnnn nnnnnnnnnn nnnnnnnnnn nnnnnnnnnn nnnnnnnnnn  
70501 nnnnnnnnnn nnnnnnnnnn nnnnnnnnnn nnnnnnnnnn nnnnnnnnnn nnnnnnnnnn  
70561 nnnnnnnnnn nnnnnnnnnn nnnnnnnnnn nnnnnnnnnn nnnnnnnnnn nnnnnnnnnn  
70621 nnnnnnnnnn nnnnnnnnnn nnnnnnnnnn nnnnnnnnnn nnnnnnnnnn nnnnnnnnnn  
70681 nnnnnnnnnn nnnnnnnnnn nnnnnnnnnn nnnnnnnnnn nnnnnnnnnn nnnnnnnnnn  
70741 nnnnnnnnnn nnnnnnnnnn nnnnnnnngac acagacaacg ggtggaacag cactttgcta  
70801 ataacaacc gcgggagatg tggagaggct tcagaacat cacagaccac gggagcagca  
70861 tgcagcagac cactcatgac ccaccctgc ctgacactct aaacaccttc tttgcacgct  
70921 tcgacacgcc cggcagcagc agagactctg gtctctatt acagctggag gaggagtccc



70981 agactctcgt cctgcagcta catcaggtga gctccactct gaggaggatc gacaccagca  
71041 aagacgcagg accagataag gtgtcaggtc gggttctgaa gctgtgtgca tatcagctgg  
71101 ctgagatttt cccggacatc ttcaattggt cccgtgcagct cacctcagtt cctgtgtgcc  
71161 tcaagtcttc catcatcgtg ccggtgccaa aaaagtcatc tgtctcgtgc ctcaatgatt  
71221 accggccggt cgctctgaca cccgtgatca tgaagtgtt tgagaggatc atcctaacc  
71281 acatcaagga catcatccct gctactctgg acagtcacca gtttgcttac agggagaacc  
71341 gatcgacaga ggacgcagtt tcattagccc tgcattgctac cctgtcccac ctggagcatc  
71401 ctgacaccta tgtcacgatg ttatgtgtgg acttcagttc agccttcaac atgggtgatcc  
71461 cagacaagct gacactgaag ctccacaacc tgggtctgccc tgccctccctg tgccctctgga  
71521 tcaaagnnnn nnnnnnctga ctgggaggtg tttaaagatg gctcagacct ggaggcctac  
71581 acaacattca tctgagcta tgtcagttc tgcaccaatg ctggtctgcc cacaaagtcc  
71641 ataaaagtgt acccaaacca gaaacatgg tttgatggaa cagtgcggtc tttgctcaaa  
71701 gctcgggatg cagcctacag ttcaggtgac aggctggcct acagcagagc ccggacagag  
71761 ctgaggaggg gcatcaacca ggccaaacgc agacacagac aacgggtgga acagcacttt  
71821 gctaataaca acccgcggga gatgtggaga ggcttcagaa ccatcacaga ccacgggagc  
71881 agcatgcagc agaccactca tgaccccacc ctgcctgaca ctctaaacac ctctcttga  
71941 cgctctgaca cgcccggcag cagcagagac tctggctctc tattacagct ggaggaggag  
72001 tcccagatc tctgctgca gctacatcag gtgagctcca ctctgaggag gatcgacacc  
72061 agcaaagacg caggaccaga taaggtgtca ggtcgggttc tgaagctgtg tgcataatcag  
72121 ctggctgaag ttttcccgga catcttcaat tggctcgtgc agctcacctc agttcctgtg  
72181 tgcctcaagt cctccatcat cgtgccggtg ccaaaaaagt catctgtctc gtgcctcaat  
72241 gattaccggc cggctgcctc gacaccctg atcatgaagt gctttgagag gatcatccta  
72301 aaccacatca aggacatcnn nnnnnnnca cggaaatcaat taaggggaga gaatgtttgt  
72361 ctttgacagt tatttggtt aacatcatct ccgacaggtg atgatgagg gggagattgga  
72421 ccttgagaat gtatgttctc atggcgacct tttctggtcc ggagagattg tataatttcc  
72481 ccttggggag agggagaccg tttaatagct caatggagca atcgtacggt cgggtgaggcg  
72541 gaagtgaact agccatagct ttactgaaaa ccgtacaaag atcgtgataa caagcaggaa  
72601 cattagacag gtcgatttct ttatcatgag caggatcagg agcgtcacga atgggcaagg  
72661 cggaaatgatg ccaagatggc ggccggcgcgt gcacatgcag cggctcagcg ctctctgctt  
72721 ttgtttgctt tttcatgtt tttgttgggt ctacagacac tggaaagcgt tactcagtac  
72781 agcaggacgg aactacttca aattagttg cattgtcaat ttaatactcc cccaaagtcc  
72841 gactttatac caccggagat ccaacggact ggcacggcct tcaccatac cccctgtggc  
72901 caaggagacg gagaagacac tgtaaaaaa agcgggggag gagaagcggg gcacgcgata  
72961 ggctacatgc taaccgcgat cgaccagctc tcccagctc ctccctcgtc aacgtaagat  
73021 cactcgccaa caaactggat gagtttcggt tacggattgt ctccggcgtg atggacagct  
73081 gtgtggccat cataacagaa acctggctgg acaataacac acctaacgtg gcggtggagc  
73141 tagcggaccg ttctttgttc cgcgcgatc ggcactgcaga ctccgataag ggcagagcgc  
73201 gcgactggc gctttacatt cacaactcct ggtgtgcagc cacacacatc atcgnnnnnn  
73261 nnnnacacca caggggtgtg tctcagccc cgcctcttc actctgttca cccagactg  
73321 ctccgctatt catttcacaa acctggtttt aaagtctgcc gacgacacca ccgtagtggg  
73381 tctcatatcc aacaatgatg agactcacta cagagaggaa gttcagcacc tgacatgatg  
73441 gtgtggtgac aacaacctca tctgaacac ctccaagacc aaagagatca ttgtggattt  
73501 tagaaggact agaaaggtgg cacacatccc cctcctcatt aacaggagg aggtgagtg  
73561 ggtggaccac atcaagtcc tggggatcca tatcacatct gacctcacct ggtcgtgca  
73621 cacatcccac ctggtgaaga aggctcagca gagactcttc tttctcagga agcttaaaag  
73681 gactggactt tcatctcaac ttctggggaa ctctacaga gcaaccattg agagcatcct  
73741 ctgtctgagt gctacggtgt ggtacgggag ctgcactgct caagacagga aggaattggc  
73801 ccgggtggtg aaaaccgcac aggacattgt gggaggacct ctcccacaac tcaaaacaca  
73861 aaacaaagag tcggaattct ccaatgaac gttcgaatgg gaggtgagtg ataggatggg  
73921 aagccagaaa agcttgggcc ctactgcgg agagagttca caattaatga aatattgctg  
73981 tggctggctt ggtaatacct gggagcctga tggaaaatga gttgacactg tagtaggaac  
74041 cctccacagc tttcaacatc gctgtagaaa ggttccggct gtaggaggac atttagaagt  
74101 ctttatatac aaaggtgagt tttctgcatt tctgataata gaaaatctca gaatttatgg  
74161 aaaaatccaa agtttgtcta ttaaaagtta ttaatacat gtctattttg tgtaagagaa  
74221 gacattggta tgatattttt cataggctaa taaaatgttt tattgttagg aaacacattt  
74281 taaattaaaa aggatcata tttgataaat aatttatttt ttatgagcta aattattaat  
74341 aaaccacatt tgcacaaaaa ggttgagagc agctgttgat tcagatcagt tccctttat  
74401 ctgaaagagg tttttgtacg acgttgttct actgtgtgaa cggctctgctg tcaccctgct  
74461 gacagtaata aactcctgaa tcttcagcct gaactccact gatggtcaga gtgtaatcac  
74521 tgccagatcc acttccacga aaacgatcag aaactccaga ctgacgagtt gttgcataat  
74581 atatcaggag tttaggagct tctccagatt tctgaagata ccagtgagtg tagttgcnnn  
74641 nnnnnnctc ctggaacaac agagtgagat ccaggagtct gagtcacag gatttcacct  
74701 gatgaacctg gaaaaaagga aaaacagaag agtcattgag atgaatccag atgaaagaaa  
74761 tctaagaatt gtgatgaagt ttgttctcgt atgaatccaa gtttccagca gagagctca  
74821 ccctgaacaa ggagctccag gacagccagc agcagagtca gtgacatcct cattgtgctg  
74881 caggtgtgtc agtgtctctg aaaggtctgg acagccactg atcaacactg agctcttaac  
74941 tgctggaagc agagaggcag cacacatag caaacacact gagtcagtca tctgcagctg  
75001 ttctcagcag ctctggatgt tcagcttggaa atctttggcc tacaggagct gcagcagcac

75061 aactctggaa taaagactcc acactcagtc acttttagcag attagattgt gattagaagc  
75121 atgtgttaaa aacgtagatg ttacataaaa aagaaaaaaa agtttgatct gaaggatcct  
75181 ttacttggtt gtgtctatat cttcttttca tagtcagggt acctggagaa aaccacacaa  
75241 tgcatgtgaa gaacatctaa actccagact gaaagatcct cactgggatt tgaaccagaa  
75301 tcttctttcc atgagggtgag agaggtaacc actactccac tacaccacca agcagcctg  
75361 ctgccaacag cttttgatat aattttgttc atctaaatca ggagggtcaa actcgttttc  
75421 actgagggcc acatcagcat agtgtctgtc ctcaaagggc cagatataat ttattcatgt  
75481 aactaaatgt aatgaaaaat aaatgcaact actccttaat gttaaataac tcattattta  
75541 tttattataa ctttttagag tgacaattac agttgcatag aaaacataatg tttgcttgtt  
75601 attgtagcat aaatcctttt acatttgatt ctgtcagggt aggttatatg gacagtgttt  
75661 aagtcctaata gtatagttga ccaatctgat atttcaagtc caatctcccc ctagatttga  
75721 ataagtacac accaattcctt acttttaaga aattaaaaac tgttatgctc tcgcggttag  
75781 agctgtgacg tgtcggattt ttgatcaccg cgggtgatgaa ccaatcccc ggcgccgca  
75841 tcagaaataa atacaattac aacgtagtat tccttattaa caaataacag taacaactaa  
75901 ctactaccta tctaactaat gaattaacta tatagggtgt gtagattgac tgtgactgtg  
75961 tgagcgcgct gcgtcgtgtg taggactagg aggagggagc gtgcacacgt gtgtggggg  
76021 tgcgtgttga ttcttttgct ctctagctgc atgtgaggct tcacctgtgc tctctgttac  
76081 agactccttc tcagaatatt atttatggc cagtaataaa cagactgagc acactgtcac  
76141 ctttcaggta gccatgaagc ctgacacca tgaagaacgc ggggcaggag gctccgcctt  
76201 taattataca gacacgtaac gttgcgctgc aaaaaaagt tcccaaaca aacatgtagt  
76261 gatattcatg gaaatctaac agcgcgctt catgtttggt gttacagagt gactgagaaa  
76321 cagtaataaa ctcccccaa cacaaaatcc tccagcgggc ggccgtgtcg cgcacttaa  
76381 aacgcacgca gcgtgtaatg gaaatgaatg caaatggaaa ttaataatta aaaacgcagt  
76441 aaatttgaga cggaaacttc tgtttgaga tgaggatgtg tgcttctgac agcgcgctcc  
76501 cgtgtgtgta aacggagccg cgtgcagcag aggcagtgag agcacgtcaa ggagagagag  
76561 tgacaggcac gtgggagaga aggagagaac agtctgaaag aaagaatgaa agtctgaaca  
76621 caggactagc agaaagagtc aattatcagc aaagatgaat gtgtttaatg tgtttattat  
76681 agttccaatc acgcaccata ttcaaaactg aaaaaaaaa agtgcggtga tgcgtgatg  
76741 aggtcatcat cacagcccta ctgcggggcc acataaaaatg acatggcggg ccacatttgg  
76801 cccgcgggct ttgagtttga cacatgtgat ctaaatcata tgactggagt ttaagagaa  
76861 ttttaaggatc attttaacca aaccataaag agaaaataaa aaaaaaacag aaatgttaa  
76921 cttcattttac atttgacaaa tagaggctat aaacacattt ttgtcccata tttatctgca  
76981 ttcgtttcta gtttctttta atatgttaaa tgaatctgtt tataaatgtt gctgattttg  
77041 aagacttttt aggtcaaaga aaaccaacta atataggaaa cgtgtgttta aaactgatgg  
77101 gtataggtaa cataggtaac attttaagac ttaataaata ataaaaaca actttttggt  
77161 tgaattgtt tttaaattat gcttgagtc ttttagctca gctgttcaga cagatcagac  
77221 cctcttttagc ttaatgagga tttttagta tgtggctcgt tcacaggtc ctatgattca  
77281 gttgatgatg atgatgagtc tggctgagga aggtcttctt ctctcgtctc ttgtctgagt  
77341 cagacacact tttttctcct cttaacttct tctccactga gcctgtatct ccctctctg  
77401 ttcacccttc tgcctttaat cattctgaaa atggatttga taagctgctc tatgaattca  
77461 atctacaaca ttttgtcatc ctgaggttca gtcctgtcca gacgggactt taacatctgg  
77521 atgtaccaa tttcatggg gtagatggag gctgggtgtc ctattccaac cgtctgtgga  
77581 tgtatagcta ttttagatgt tgatcatcaa aaaactcca aacttgttct gacaagatga  
77641 tctctgattt ccttgccat tggggtcga gaatttctga tttttctaga agttgtgaag  
77701 cagcaaacat caagagagtt ggagatttgt ggtaaaaaaa attgtgcagt tctgactcag  
77761 actgagagac tgttgctgct tcaccagaaa ctctacttta caccagtgga cagtataaag  
77821 tctatgaact ggtggaaaaa tggatcaca ctggagagaa tttctgcaca gataggaaga  
77881 aaactaaatc caagttacca aaaattggat tcatagaaca tctcaaagac tccgtcagac  
77941 cagtgaagga catgactgct agacggagaa acaagtctgc tgtgatctga cctccetaag  
78001 gcttgagag tttagcataa ttttaaaact cctccttttg tgttcagtgt gtctacagta  
78061 aatcagtcag tgtttcagtc tctggaagaa cttgaggcag aaacattcaa atgagtttca  
78121 gttcattctg atgaaggagg tttttgtacg atgacttttc actgtgtgaa cacatactga  
78181 ctggtgatcc agtgataact ctgacagtaa taaactcctg aatcttcagc ctggactcca  
78241 ctgatggtca gagtgaagtc aattccatat cctgatccac ttccactgat tctggaggag  
78301 attcctgata atctgtcaga tgttctataa atcagagctt taggagcttc tccagatttc  
78361 tgatggatc aggcaagata gtattgtgaa ccagtgtagt gagctacttt ttgactggcc  
78421 ttacagtcta tagtgacctc ttgattgagc tgcactgat tgcactgctg tagctgctca  
78481 acaacatttt gtccaacaga acctgcagag agagaagaac cacaaagaac atgagatgct  
78541 gaggagaaac tcagctgcac tccagatgat tctcacatga cacaaacatc atcttctca  
78601 ccctgaatga agcagaggag agtccagatg aggacgcaga tcaaagtcac ggtttgactg  
78661 aggaggagga ggaggatttc tgtgtcttct gctgtgatga aggacagctg tcagtcatcc  
78721 agtcttcaac tctcaggact ataaagtctc ccagagcact ggagcatgga gctgctgatg  
78781 caaagtgttt ctatggaaat gcaaccactg actccaacag gaacatggat ctctgtcatc  
78841 aggattcact tcaatggatc aatcaatcat tccagatggg attcaaaaat attgaattat  
78901 gctcaaatac aatgtttgtt tttaccacta ctacaagaac ctttacctca acaaaataag  
78961 aacttaagta gaaattaagc taaatttagc tgaaaaaata aaaaactatt gttattatta  
79021 tttcagtaac aacttttttc acatcaatcc gttgttttcc agtcagactg tgttgagttt  
79081 gttgtgttca aagtcagaga gcgtgtctct ctgcagtcag aggtttttgt acgacgactc

79141 agttagtttg taccactgtg gtacacgttt ggtggaggaa ccagactgga ggttgattgt  
79201 aagtaattta ttttctattt acatccatgt ttttaacaaaa agtggttttt ttaagtacca  
79261 tgaactaata tttgtctact tgtatgattt tcacagattt agtttattca tatattgcan  
79321 nnnnnnnmna atctgtgaac tttgttagat atttttaacc ttttaacaac tgctaaagaa  
79381 aatgtttatac cacatttttga aaatattcct ttaaaaaaat tgattctgtt ttttctcac  
79441 caaagaaata aacaaatgtg aaaaaaaata tgtttttttt cagttggggt gttttaagtt  
79501 aagtgcagta agtttataac tcaaagatcc ttttcttatt ttacgttaag aatgaaacct  
79561 gtttgttgat gtggttcatt ggtgaagctc atctgttgcc atggttacag cacctaaaga  
79621 aggaagtga acattgaaaa aagtgttaaa ctaactgaag aaataaagca gcattttgct  
79681 gcaggaagag tttctgttct ctttgatga tttctcatga acttgttgt gtctcctcat  
79741 gcagtgggtc atgttcccc caagctgaca gtgctgtccc cctccatgca tgaaaagaa  
79801 gccacactcc tgtgtctggc caacaatggc ttccctcag gctggactct gtcctggaag  
79861 gtgggcgga gcagcatcag cagcagctgg gaggagagca ggagccccgg ggtgctgcag  
79921 aaggacggcc tctacagctg gacgagcacc ctgaggctcc ctgcagacca gtgggagaag  
79981 ctggactctg tgacctgtga ggccaccag gactcccaga ctccagcat agagactctg  
80041 tggagaaacc agtgttccca gtcaccacct gactgactgg gattctttta ctttgtttta  
80101 aactattctg actttnnmn nnnnctatt ttgactttac tttgtaact tttgtggcatt  
80161 tttttttatc atcattttga atgttggaa tgcttcctt tttttttta aataagatt  
80221 tttttcttca acttaactct ggtttgttac gttttttcac attcagacat gtttttgatc  
80281 acaaattta aaataatgac aatttatttt aaaaatttaa aatacatttt taaaataaat  
80341 acaatttat ttaaaaaagt ttagtatatc taaagtatag tatatagtat agtataggat  
80401 atttatatta tttttttaca tttctaaagg aacatactaa ctttattgtc tattagtga  
80461 cagactctg cagctctaca ctccaacatc atcatcactg aggtcatatt tgtctgtga  
80521 ctttgtaaac cagagtcac agaaaatgtg ttttactaaa cgtatcagtt cctcctgtac  
80581 acctctgaat gttttcctga tgagaaactg taaaaactt tcttttcaca tcttaattt  
80641 ccgacagttg aaccagatgt agctgtctca ttggataagc ctttactgc tgaagaacta  
80701 aagaatgctg tcatgtctat gcaggatggg aaaagccctg gtcctaggt tcccatttta  
80761 aatttttaag gcttttatgg ataaactatc cgctctaact cttaacatgg taaaggcttc  
80821 agcagatctt ttgggctact ttgagcagc cacaactctc cttatcctaa agaaagataa  
80881 agatctgca tgctgcagca gatatggcc tatatctttg ctgtgtgac atgttaacat  
80941 tttagcaaaa ttgctagcaa aacacttgya gctgataatt cccacattaa tcagtctga  
81001 ccaactagc tttattaaaa ccagacatat cataatatta ggaggcttat gaatatttta  
81061 cactgcacct ctccaactag ccccccgaa atggctcatc ccatggatgc tgaatggcc  
81121 tttgattggg tggagtggcc ttacctgtt tgtactcaga gatgcttgg ctttggatct  
81181 aaattcctat catggatcaa attactgtac acatcaccta tgacacgtgt ttgcactaat  
81241 aatgactact tggaaagggt aaaataggct gcatcaaaat taatgtgtc cctaaaactc  
81301 tctatttttt tcaatgtcta ccagtattca ttccaaagca aattttcgg tcccttgaca  
81361 attctattgc ccaattctag cctccaagga tgagaaaaac tatattgagg aaaagcaatg  
81421 ataatggcgg cctacaggag ctgcagcaac acaactctgg aataaagact ctacactcag  
81481 tcaacttagc agattaccgt acatttgtgt tcagatatcc ttgtaataag ttagatgta  
81541 aactagaat gaaacattat taactgttag ctggaaggaa attttcgatg tttttgctt  
81601 tatctgctat tcatatctga gaaaatattt gtgtctaaat gagtttcatt tttttgtagt  
81661 aaagcttaaa tttgcaaata taaatataca aatgttttat tgccagtat atgaaccaat  
81721 ggttaaaccc aacatgttt ctaaatcac tttgtctga atttttccta agttgggcaa  
81781 agcaactcc agtgagctca gagagttgaa taacatcaga catcatctgt ctagtgtaga  
81841 aatgtctaca gagcagaagc acagaagtat ttgttgaga aaatacataa atgttgggt  
81901 tattgatata tcaagataaa aaattctgat tctgtgttc aagctttta aatgtaagga  
81961 tgatgaactc atgagtcctt agaaacacca ggagtctgta gcagagaaga ttttctgtct  
82021 ttttcaaaca tctataaatc catccatcca tccatccatc caccttggat ggggcaccag  
82081 ttcatcacag gccaacacaa ccacagctc atacttagg acaatttat ctcagcaacc  
82141 aacatgtgat gcacagctc ggactgtgga agaaagatgt ttctggaata aagactactt  
82201 attgaaactt tgttttacct ttaaattgat tatcttctcc ataattggtt aatcggttct  
82261 gaagctgaga gggatagggt ccagttttat ctgtgaacca attctatgac tacatgtgac  
82321 acagtaaaga acctcgggtg gattctagat gcagatctga gctttgacca acatgtgaa  
82381 caaatgacta aatttacatt ttaccatctg aggaatgtca ccagagtgtg accctttctc  
82441 tctggagctt gggctgaaat cttaatccat gcttttatta catccagaat acattattgt  
82501 aatgccctcc tttctgggtg aaagaaaacc actcttaac acctgcagct agtcagaac  
82561 tctgctgcac gccttttaac gagaaccagg aagagggagc acattacacc atcctaaaat  
82621 ctctgcaact gctccctgtc agcttcagga ttgattttaa gattctttta atagttttta  
82681 agagtgtcca tggcttagt ccttctttta tatcagactt gcttttaacg tatgaacctc  
82741 ccagaccctc caggtcctca ggtgcagccc tgctgaaggt ccctagggtc aggacaaaa  
82801 accacggcga ggactcgtt agattctacg ggcctcgtct gtggaacagc ctacctgagg  
82861 atgtgagggc ctcatctact gttgaggtt ttaaaatgaa attaagaca cactgttta  
82921 accagcttt taaatagatt tcaaatcttt tctaagctag aattttcatt tttactctt  
82981 ctgttttatg atgttttatt gcatcatttt atcgttgtat ttgttttaac tagaattttt  
83041 actcttata ttcataattt tttatcacat acatatttat ttaatgtctt tgagccaatt  
83101 agactgttta cgagtgttt tccgttagt gtctgtgctg acaccaacg ggaagacagg  
83161 gcagacggcg cctgctgggt tctcttttct ctttacttgg tgtttgtttt tgtgaatttt

83221 attgtgctgg gcttatttaa taattctatt gcatgaatgg ggattgggtg tttctacatt  
83281 cttgtttttt tttatgtaca gaacctgag ctgttttttt ccatgaaagg tgttatagaa  
83341 ctaacaataa atgattaact tttgtccatt agcaaatcta atagattatg gaaacagtgt  
83401 aacttagttt ttgcatgaca ttttcagta attgagttat ttttttagat aaaaatctca  
83461 gacagagttt agtattaata aatgtccatc ccccatTTTT gagtatttat aagaatcatt  
83521 attaacaaaa actaagacaa atactcaata caaacttctt taagctttaa taaaagaacc  
83581 tcagataaag gtactgctgt ttgattattg tgtctttctt tgtgtgttta gtgtgtctac  
83641 agtaaatcag tcagtgtttc agtctctgga agaacttgag gcagaaacat tcaaatgagt  
83701 ttcagttcat tctgatgaag gaggtttttg tacgatgact tttcactgtg tgaacacatc  
83761 ctgactgttg atactgtgat aactctgaca gaaataaact cctgaatcct cagcctggac  
83821 tccactgatg gtcagagtga agtcaattcc atttcctgat ccacttccac tgaatctgga  
83881 ggagattcct gaaaatctgt ctgatgttgc atagatcaaa gctttaggag cttctccaga  
83941 tttctgatgg taccaggaaa gcaagtaatg gggatcagtc cattcataat ccatgaaaca  
84001 agagtaatca tcagtgcaga gaaatacttg ttgactggct ttacagtcta tagtgacctt  
84061 ttggttgagc tgcactgatg tagctgctgg ctgagtcaca acaacatttt gtccaacaga  
84121 acctgcagag agagaagaac cacaaagaac atgagatgct gaggagaaac tcagctgcac  
84181 tccagatgat tctcacatga cacaaacatc atcttctca ccctgaatga agcagaggag  
84241 agtccagatg aggacgcaga tcaaagtcat ggtttgactg aggaggatga ggaggatttc  
84301 tgtgtcttct gctgtgatga aggacagctg tcagtcaccc agtcttcaac tctcaggact  
84361 ataaagtctc ccagagcact ggagcatgga gctgctgatg caaagtgttt ctatggaaat  
84421 gcaaccactg actccaacag gaacatggat ctctgtcatc aggattcaca tcaatggatc  
84481 aatcaatcat tccagatggg atttaaaaa attgatcat gctcaaatat aatattcgtt  
84541 tttcactact agtacgtatt agaatacctt tacatctgca aaattaaaaa ttaagtagaa  
84601 attaagctaa aacctgaaaa aaataaaaaac ttgtattatt atttcagtta taaccttttt  
84661 cacatcaatc cgttgttttc cagtcagact gtgttgagtt tgttgtgttc aaagtcagag  
84721 agcgtgtctc tctgcagtca gaggtttttg tacgacgact cagttagttt gtatcactgt  
84781 ggtacacggt tgggtggagga accagactgg aggttgattg taagtaattt attttcaatt  
84841 tacatccatg tttnnnnnnn nnnnnnnnnn nnnnnnnnnn nnnnnnnnnn nnnnnnnnnn  
84901 nnnnnnnnnn nnnnnnnnnn nnnnnnnnnn nnattaataa ataaaacaag tgacattttt  
84961 ataaataaaa tattgcacag ctgagctgga gatgactgga gcagcatag aaccagaaaag  
85021 ttttggactt gttgacgttt tgagtgaatc tcagctagaa ggaaacaaca acttaatagt  
85081 cttagttatg cagatcattt catgtggttt attcttttct tattaagacc taataaaaaac  
85141 caactagtcc tagtgtcctt tctgggtccc cctggatgta cagcgtcctt cacattctat  
85201 tattttatct ctgctactgg ccggctctgc atgcatttac taaacctgct atgtaaatgt  
85261 tggcatcact gcattgatgg agtccatcca gttactgtca ggtgaaggty gactacagtc  
85321 tagacgtht gtcagttcat cacagaaaaa cacaaaaaca cacaacaaca cactcacatc  
85381 cacacgtaag ggtcaatgta gactcacaa ttaaccaact tttatttat ttttcaact  
85441 gagggagaga gtttgtctat gtggagaaaa ccatcatctg catgaggaga acatgcaaac  
85501 tccatataga aagaaccggt ctgggatttg aaccaaaacc tcttactgt gaaatgagag  
85561 tgccaaccgc tacaccactg tgcggaccat tgattaagtt atatggatgt aaccctgtg  
85621 ccatcctagg cacgttaaca ttgggagttg ggtcatctag acccactaga cagagctctg  
85681 aacctttttt cttcaatgat ttgtaattct cactggtgtc catgaattac atgaaatctt  
85741 tccaccttta tccacctttg tcatggtagg gagaacacct caatgtaagg gtggggtcaa  
85801 ctaagatagc acaagggtta attgaaataa agagtttatc aaaaatacaa tctctgaagt  
85861 ttctttcatc tccatgaacc caaattatat ttttctctgt atcttttgca aaaaataaaa  
85921 ctgcatttgt tttaattatt aatcattaaa aaatatataa acagttctgt ctgttctctg  
85981 cttcaatcaa gataagcttt gtatagatgc tgtaataaaa gtgtgtaata aatgaagaaa  
86041 tgagcctcaa acacaaatga aaagaaggac gttctgctgc ttttgaagct tttcaatctt  
86101 cctccaatga aatatgtcac taaagtgaat gaagtcctca ctgttttata aatattattc  
86161 catattttta cctgacaaat taatacagac actttgatgg aatataaagt agtggttgta  
86221 cagtttttag atcgctgtaa atgtttgtct cctgaaaaaa cacaaacatc aatgtctgaa  
86281 cctctggtat caaagtaaaa ataatgtcta aattgttata agcatttttt tcttctggca  
86341 gattcattga ggttgaaga tttgagaatt tatagaaaaa tccattattt ttctattaaa  
86401 atagagaaga catggatag atattttgta aaaggcaaat aaaatgcttt cattttttta  
86461 aaacaaaaaa tcaaatcaaa tttgaaaaaa aaatttcttt tttatgaact aaattatcaa  
86521 taaaacacat ttgcaccaag aggttgagag cagttgttca ttcagatcag ttctcttta  
86581 gctgaaagag gttttgtac gacattgttt cactgtgtga acggaaagct gctgccttgc  
86641 tgacagtaat aaactcctga atctccagcc tgaactccac tgatggtcag agtgaatca  
86701 ctgccaatc cacttccacg aaaacgatca gaaactccag actgacgatt tgttgetaaa  
86761 taaatcagga gtttaggagc ttccccagat ttctgaagat accagtgagg ccagctacca  
86821 acacttgaac tggtttgaca tctaattggag aaagtttctc ctggaacaac agactgagat  
86881 ccaggagtct gagtcaaagt gatttcacct gatgaacctg gaaaaaagga aaaacagaag  
86941 agtcatggag atgaatccag atgaaagaaa tctaagaatt gtgatgaagt ttgtttctg  
87001 atgaatccaa gtttccagca gagagtctca ccctgaacaa ggagctccag gcagctcagc  
87061 agcagagtca gtgacatcct cattgtgctg caggtgtgtc agtgtctctg aaaggtctgg  
87121 acagccactg atcaacactg agctcttaac tgctggaagc agagaggcag cacacatag  
87181 caaacacact gagtcagtca tctgcagctg ttctcagcag ctctggatgt tcagcttggg  
87241 atctttggcc tacaggagct gcagcagcac aactctggaa taaagactct acactcagtc

87301 acattagcag attacatttg tgttcagaca agagtgttaa agagtctttt aattacagat  
87361 aagagtgttt tggcctttac ggatagacac tttcttcaaa gggcagcccc cccatcgctg  
87421 atcattcttc acaataaaaa taatttatgt gtgcctatth tagtgaggca tgtggctaaa  
87481 attaaggcta attcaaaaaa aggttgthtt aactatthtt agtccccca cagatgcagg  
87541 tttaggagct aaaaagcaaa acgttctagt cagaagctcc acctcagtaa agggthttaga  
87601 tctgaaagag aacagagtht tagataaaaga gcttctctgc atthacaggt ttaggagtha  
87661 aagaaagctg tccctccaaa gctaaaagct cctccatggt tgctggttha gaagcacaaa  
87721 gaggtaaatc ttcacatttc taagatcctc cacagctaca gcatcaggag ctggaaaaagc  
87781 acaaaaactgt gagtctgaag ctctgtcagt gctthgggtt ttggagcaca aacatcatcc  
87841 agththtca gctcctccac acttacggga tcaggagctg acaaaattgg atctthaaag  
87901 tcagaaactt cccacaata tgagthtagg agctaaagaga tggaaacagt cactgattt  
87961 caagggttht acathtatag aggactcttc ctgathctg tcctthtagt ctcactcagt  
88021 aaaattctgt accaaaagcc ccagagacaa taaaatcaga ttatctthaa ctgthaaagg  
88081 thtggtagac tgtggthcaat ctatcaagtc acatgatcat thctagggag atgagthaact  
88141 thaatctaca aactaaaaaa ggtcaaaaag tgtcactgaa gatgthctg acaaaaagag  
88201 atcctggaaa aaagactcta cagtaththga atgthgatgt thaatthgtg ththctctc  
88261 ctaaaaataga gthaaacttht ctthaggaat aaaccaaata gthctataaa thaatccaat  
88321 taactthaat aactgthtac tcaththtagc atthcaathg ggtagagca ththaaactg  
88381 cagacaaaaa cacatataaa aagthgtcact ataggtgtht ctcaccagaa aaaggggcta  
88441 aatgthtatt tctthctatt gththgatga atthtagaga aathcacta thgcatthaag  
88501 tgtctthgaa thgtgtctth ctthgtgtgt thagthgtgc tacagthaat cagthcagthg  
88561 thcagthctc ggaagaactt gaggcagaaa cattcaaatg agththcagth cattctgagth  
88621 aaggagthtt thgtacgatg actthctact gthgthaacac atactgactg thgtactgth  
88681 gthaacctcg acagthataa actcctgaat cthcagctg gactccactg atgthcagag  
88741 tgaagthcann nnnnnnnnnn nnnnnnnnnn nnnnnnnnnn nnnnnnnnnn nnnnnnnnnn  
88801 nnnnnnnnnn nnnnnnnnnn nnnnnnnnnn nnnnnnnnnn nnnnnnnnnn nnnnnnnnnn  
88861 nnnnnnnnnn nnnnnnnnnn nnnnnnnnnn nnnnnnnnnn nnnnnnnnnn nnnnnnnnnn  
88921 nnnnnnnnnn gagthcacaac aacaththgt ccaacagaa cthcagagag agaagaacca  
88981 caaagaacat gagatgctga ggagaaactc agthgcactc cagatgathc thcactgaca  
89041 caacatcat ctctctcacc ctgathgaag cagaggagag thcagatga gcgthcagatc  
89101 aaagthcaggg thtactgag gaggagggag aggaththctg thtctctgc thtthgagag  
89161 gacagthgtc agthcatccag thctcaactc thcaggactat aaagthctcc agagthcaggg  
89221 agcatggagc thgtgatgca aagththctc atggaaatgc aaccactgac thcaacagga  
89281 acatggatct ctgthcatcag gathcactc aatcathcca gatgggath ththththth  
89341 gathaatgct caaatataat atgctththt caccactagth acgthathaga ctatacttht  
89401 acatthgcaa aatathgaact thagthgaaa thagthcaa ththagthgaa aaaaaactat  
89461 thaththtag aactathgga acaththtaga athctthctat thcaaaaaa aaaaactata  
89521 athaaaaatt agthaaactt agthaaataa thaththtag atgthththt thctgthaaag  
89581 aactththtc acatcaatca gthgthgtht ccagthcagat thgtgthgag thgtgthgth  
89641 caaagthcaga gagctgthct ctctgcagtc agaggtthth thacgagcag thcagthgth  
89701 thgatcactg thgttgactt thgttgaggg aaccagactg gaggthgath gthaaagtht  
89761 ththththcaat thcatccat gththtaaaa aaagthgath ctththaaag thcaaaacta  
89821 acaththgct actthtagga thththcaga ththagthth thcatataatg caggaaactat  
89881 thcagatgth agataaacgt gathctatht gaaaatcath thgtcathat thctgthaa  
89941 aggtgathth atagththct aagthatacgg aactththgaa atataathth gthgaththt  
90001 aaacatctca aaatactcat aggtgagth ththgagth thcaaaaaa aaagthgaca  
90061 agacgthaca acgtcaaat gthgcttht thctcgtctc atgthcagaa ctthaaactc  
90121 ththtagath ththaacct thathctgth cagcaaatg thgtcagatg thgacaaaa  
90181 thctthaaaaa aatgaththt thaatthgth accaaggaaa atcagaaaata thaaaaata  
90241 aatgththth thctctgthg gthgththaa actthagthg aataagtht thctthgag  
90301 atcgththct thththacgt thgactgaa acctgththg thgatgthth cattgthgaa  
90361 gthcatctgt thgcatgtht acagcaccta aagaaggaa thgaaagathg aaaaaaaaa  
90421 ththaaacta actgaagaaa thgagcagca ththgctgca ggaagathth ctgthctctt  
90481 thgatgath ctcatgaa thgththgthc thctcatgca thgggthcatg thcccccaa  
90541 gthgacagth ctgtccccct ccatgcatga ggggaaaggcc acactctgt gthctggcaa  
90601 caatggcttc cctcaggtc gactctgtc thggaagthg ggcggcagca gcatcagcag  
90661 cagctgggag gagagcagga gcccggggt gctgcagaa gacggctct acagthgag  
90721 cagcacctg aggtccctg cagaccagth ggagaagctg gactctgthg cctgthgagc  
90781 caccagagc thccagactc cagthccaga gactctgthg agaaaccagth gthctctagth  
90841 accacctgac thgactgaa aataththg thgththgth ththactgaga ththcagctg  
90901 atgaththth thaatctct thctthgthg gthataaaaa caththgath aaaagthagth  
90961 thththaatg thctgcaaa athaaaaaat actctthaat gthgththth thgtgththt  
91021 thaaacathg athacttht athaaaact thactthaat thaatgthca aataathgth  
91081 thgaaactct agthctctg thctgagthg agthctctc gthactgthg gthaaagthg  
91141 ggthacaatc thgaaacaggg thcaaacgth ccagctthca aaaaacata thththata  
91201 cathththgth ththataaag aaaaactha cathctctc thgtcagctca aagactagc  
91261 thgtccacac ththagtht ctthcagthaac atcaggathg cggagthcat gthgthgag  
91321 ththgaththg athththgaa thcatcaath cctgcaaaa cathththth ccaaaatht

91381 tttatcacaa acacagattt ttagttctaa aaagatactt tattcatagt ttgatgttca  
91441 ttaaagcaaa aactggaaag ggaagttttg taaactgata tatttttttt tattttggaca  
91501 aaatgaaaaa aaatcaaatc aatgtatagt tttttattta taacaatgag atttttatca  
91561 aaagctattt agtaaactta gttattttag gttgagagga gctgttcagt cagatcagtt  
91621 cctcttttagc tcaaagaggt ttttgtacga cgttgtttca ctgtgcbagt ggaaagttag  
91681 caccctgctg acagtaataa actcctgaat cttcagcctg aactccactg atggctcagag  
91741 tgtaatcact gccagatcca cttccacgaa aacgatcaga aactccagac cttcgggttg  
91801 ttgcagcata tatcaggagt ttaggagctt ctccagattt ctgaagatac cagttgagta  
91861 ggccactaac acctgaactg gtttgacatc taatggagac agtttgcctt ggaacaacag  
91921 actgagatcc aggagtctga gtcacagtga tttcacctga tgaacctgga aaaaaggaaa  
91981 aacgagaagag tcatttgatg gaatcctgat gaaagaaatc taagaattgt gatgaagtgt  
92041 atttcctgat gaatccaagt ttccagcaga gagtctcacc ctgaacaagg agctccagga  
92101 cagccagcag cagagtcaat gacatcctca ttgtgctgca ggtgtgtcag tgtctctgaa  
92161 aggtctggac agccactgat caacactgag ctcttaactg ctggaagcag agaggcagca  
92221 cacatatgca aacacactga gtcagtcatc tgcagctgtt ctccagcagc ctggatgttc  
92281 agcttggaaat ctttggccta caggagctgc agcagcacia ctctggaata aagactccac  
92341 actcagtcac tttagcagat tacattttgt tttacagtgt taaagatct tctgatcaca  
92401 gatgacaaga attcttttaa cttaactgtg tgatatgctg gtcgggtgaa aagttctgctc  
92461 tctccaggtg gaggacttga agtatcttgg ggttttgttc attagagcgg gaaaatcaga  
92521 gcgggagatt aaaagctgga atgtagcggc gtctctgtca tggctcggca atagttcggg  
92581 gtgaccacaac agcggcgcag cagaattcca gaggtgagac ggcgtgagat caaaggacag  
92641 cgaccaggtg agatccatag tagatatttc ctgaggcaaa gacgagagga gcaattagta  
92701 atatgaagct tggcaaaaca aacaggaaca tgagcagacc agactaagca ccgtgggagg  
92761 aacaacgaac tgacgtcag tggaggtcca gatgctcctt aagaggcaac ggcggtagatg  
92821 aaggtaaagt gcagcagctg gtcctgtcca gaacagagca ggtgggggat ggggagagta  
92881 gctggcatag gcaccatcct agtacctccc cctcaacgac tgccacgagg cggctctaga  
92941 cgtcgggtcag gatgggctg gtaaaagtgc tcgatgagag tatggctccag aatgagggaa  
93001 cggaagatcc atgaatgttc ctctggacca tacccttccc agtccaccaaa gaactgcacc  
93061 ccccgcccac ggcgcccggat atccaaaatc ctactgaccg ttaaggcccg ggcgcccgtc  
93121 atggtacggg cgggtggtgg ggaagaggaa tgtgggcaaa gcagactctc agtgcagtc  
93181 ttgatctgtg aaacgtgaa tgtgagattc accttgaggg cagcagggag acgtagcttg  
93241 acacaaacaa gattgatgac acggcctatg gtgtagggtc caatgaactt gggagccagt  
93301 ttctgggaca ggcctgtaga ggaatgttat gagcggataa taccagacca tctggccagg  
93361 ctggtagttg ggactcacca cccaatgacg gttggctata tgacagttgc tctccttggg  
93421 gcggaggaga gccgcccccg tctgcagcca gatgtcccga caccgctgga ggtgaagctg  
93481 gaccgagggc actgccagat ccaattctcg ggaaggaaac aaagggggtg agtagcccaa  
93541 ggaggctcca aaaggtgata ttccgggtgc agtagaggaa tgggaattgt gggcatactc  
93601 caccacacacc aggtatttgg accagtcctc ctgattctgg gcctccagac atctaagatc  
93661 cgcctccagt tcttgggttag cccgttctgc ttttccattg gcctgagagt ggtacctgaa  
93721 ggtaaggctg acagtagctc cgagccggga gcagaaggcc ttccacactt gggatgtgaa  
93781 ttgcggctcg cggttggaca caatgtcgtt gggtagccca tgatggcggg aaacatggtg  
93841 gactagggca ttggcagttt ccatggcaga gggcaactga ggtaggggga taaattgagc  
93901 ggcttttgaa aaacgggtcaa tgactgtgag aattaccgta tggccttgag acgggtggaag  
93961 cccgataaca aaatccaccg caaaatgtga ccagggacg ctagggtgag atagaggcag  
94021 tagatgacca gaggagggcc tgttggagac tatgacagag tgccagtagg acaggaagtt  
94081 ctggcagggg tctcaccttg agcttgcctg actttgctct cgatctccca ggtgagattt  
94141 ctaatgaaac aggacgtagg aaggatgga gagtttagat tggattccat ggtggaatag  
94201 ttgcgggaca aggtgtcagg cttaacatta cggctgctgg gggcggtaag tgatcgtaaa  
94261 gtgaaaactg tcgaaaaaca aacaccaccg ggcctggcgg gagtttaagc attttgcct  
94321 gcggagataa gcgagattct tatgatccgt ccacactatg aatggttgtt ctactccctc  
94381 cagccagttg cgcattctt ccagggtcaa cttaatcacc aataactcac ggttgcacc  
94441 atcatagttt tgctccgccc ggcttagttt gcgggaaaag aaagcgcacg gtttgagctt  
94501 tctgtgctg tcttcccgtt gagacagaac tgccccata ccggaatctg aggcgtccac  
94561 ctcaacaata aaatgcttgg tgacgtcggg ttgaataaga atgggggctg aaacgaaaag  
94621 agattttaagt ttcttgaatg cagaatcggc agcagggttc caagaatagg ttttattgat  
94681 ggaggtgagt ttagtgagag gtgcccctat actgctgtag ttacggatac agcggcggta  
94741 aaaatttgcg aaaacccaag aactgttggg gctttttacg ggtctgggga acttcccact  
94801 gggcgacggc ctcaatatta gcagggtcgg ggcgtatgtt gccagcttaa atgatttacc  
94861 ccaaaaaagg gacggtggag acatggaaat cgcacttttc agctttgaca tataattggt  
94921 taaccaataa cttttcaagg acgaaacgaa catggtgttc atgctgggag gaattggcgt  
94981 agtaaatgag gatgtcgtcc aattatacaa agacaaatct gtttaaggaaa tcccgcacga  
95041 catcatctac taagcgttgg aacactgcgg gggcgtttgt gaggccgaac ggcagcaca  
95101 gatattcgta atggcctagt ggagtgttga atgccatctt ccattcatcc ccatctcggg  
95161 tacgcaagag gtgataagca ttacggagat cgagtttagt aaagatctta gcttgttggg  
95221 ctgagtcaaa cacggaatca atnnnnnnnn nnnnnnnnnn nnnnnnnnnn nnnnnnnnnn  
95281 nnnnnnnnnn nnnnnnnnnn nnnnnnnnnn nnnnnnnnnn nnnnnnnnnn nnnnnnnnnn  
95341 nnnnnnnnnn nnnnnnnnnn nnnnnnnnnn nnnnnnnnnn nnnnnnnnnn nnnnnnnnnn  
95401 nnnnnnnnnn nnnnnnnnnn nnnnnnnnnn nnnnnnnnnn nnnnnnnnnn nnnnnnnnnn

95461 nnnnnnnnnn nnnnnnnnnn nnnnnnnnnn nnnnnnnnnn nnnnnnnnnn nnnnnnnnnn  
95521 nnnnnnnnnn nnnnnnnnnn nnnnnnnnnn nnnnnnnnnn nnnnnnnnnn nnnnnnnnnn  
95581 nnnnnnnnnn nnnnnnnnnn nnnnnnnnnn nnnnnnnnnn nnnnnnnnnn nnnnnnnnnn  
95641 nnnnnnnnnn nnnnnnnnnn nnnnnnnnnn nnnnnnnnnn nnnnnnnnnn nnnnnnnnnn  
95701 nnnnnnnnnn nnnnnnnnnn nnnnnnnnnn nnnnnnnnnn nnnnnnnnnn nnnnnnnnnn  
95761 nnnnnnnnnn nnnnnnnnnn nnnnnnnnnn nnnnnnnnnn nnnnnnnnnn nnnnnnnnnn  
95821 nnnnnnnnnn nnnnnnnnnn nnnnnnnnnn nnnnnnnnnn nnnnnnnnnn nnnnnnnnnn  
95881 nnnnnnnnnn nnnnnnnnnn nnnnnnnnnn nnnnnnnnnn nnnnnnnnnn nnnnnnnnnn  
95941 nnnnnnnnnn nnnnnnnnnn nnnnnnnnnn nnnnnnnnnn nnnnnnnnnn nnnnnnnnnn  
96001 nnnnnnnnnn nnnnnnnnnn nnnnnnnnnn nnnnnnnnnn nnnnnnnnnn nnnnnnnnnn  
96061 nnnnnnnnnn nnnnnnnnnn nnnnnnnnnn nnnnnnnnnn nnnnnnnnnn nnnnnnnnnn  
96121 nnnnnnnnnn nnnnnnnnnn nnnnnnnnnn nnnnnnnnnn nnnnnnnnnn nnnnnnnnnn  
96181 nnnnnnnnnn nnnnnnnnnn nnnnnnnnnn nnnnnnnnnn nnnnnnnnnn nnnnnnnnnn  
96241 nnnnnnnnnn nnnnnnnnnn nnnnnnnnnn nnnnnnnnnn nnnnnnnnnn nnnnnnnnnn  
96301 nnnnnnnnnn nnnnnnnnnn nnnnnnnnnn nnnnnnnnnn nnnnnnnnnn nnnnnnnnnn  
96361 nnnnnnnnnn nnnnnnnnnn nnnnnnnnnn nnnnnnnnnn nnnnnnnnnn nnnnnnnnnn  
96421 nnnnnnnnnn nnnnnnnnnn nnnnnnnnnn nnnnnnnnnn nnnnnnnnnn nnnnnnnnnn  
96481 nnnnnnnnnn nnnnnnnnnn nnnnnnnnnn nnnnnnnnnn nnnnnnnnnn nnnnnnnnnn  
96541 nnnnnnnnnn nnnnnnnnnn nnnnnnnnnn nnnnnnnnnn nnnnnnnnnn nnnnnnnnnn  
96601 nnnnnnnnnn nnnnnnnnnn nnnnnnnnnn nnnnnnnnnn nnnnnnnnnn nnnnnnnnnn  
96661 nnnnnnnnnn nnnnnnnnnn nnnnnnnnnn nnnnnnnnnn nnnnnnnnnn nnnnnnnnnn  
96721 nnnnnnnnnn nnnnnnnnnn nnnnnnnnnn nnnnnnnnnn nnnnnnnnnn nnnnnnnnnn  
96781 nnnnnnnnnn nnnnnnnnnn nnnnnnnnnn nnnnnnnnnn nnnnnnnnnn nnnnnnnnnn  
96841 nnnnnnnnnn nnnnnnnnnn nnnnnnnnnn nnnnnnnnnn nnnnnnnnnn nnnnnnnnnn  
96901 nnnnnnnnnn nnnnnnnnnn nnnnnngaca cagacaacgg gtggaacagc actttgctaa  
96961 taacaaccgg cgggagatgt ggagaggctt cagaaccatc acagaccacg ggagcagcat  
97021 gcagcagacc actcatgacc ccaccctgcc tgacactcta aacaccttct ttgcacgctt  
97081 cgacacgccc ggcagcagca gagactctgg tcctctatta cagctggagg aggagtcca  
97141 gactctcgtc ctgcagctac atcaggtgag ctccactctg aggaggatcg acaccagcaa  
97201 agacgcagga ccagataagg tgtcaggtcg ggttctgaag ctgtgtgcat atcagctggc  
97261 tgaagtttcc ccggacatct tcaattggtc cgtgcagctc acctcagtc tctgtgctc  
97321 caagtccctc atcatcgtgc cggtgccaaa aaagtcatct gtctcgtgcc tcaatgatta  
97381 ccggccggtc gctctgacac ccgtgatcat gaagtgcttt gagaggatca tcctaaacca  
97441 catcaaggac atcatccctg ctactctgga cagtcaccag ttgcttaca gggagaaccg  
97501 atcgacagag gacgcagttt cattagccct gcatgctacc ctgtcccacc tggagcatcc  
97561 tgacacctat gtcacgatgt tatttgggga cttcagttca gccttcaaca tgggtgatccc  
97621 agacaagctg acactgaagc tccacaacct gggctctgct gcctccctg gcctctggat  
97681 caaagnnnnn nnnnnctgac tgggaggtgt ttaaagatgg ctccagactg gaggcctaca  
97741 caacattcat cctgagctat gtgcagttct gcaccaatgc tgttctgccc acaaagtcca  
97801 taaaagtgtc cccaaaccag aaacctgggt ttgatggaac agtgcggtct ttgctcaaag  
97861 ctccgggatgc agcctacagt tcaggtgaca ggctggccta cagcagagcc cggacagagc  
97921 tgaggagggg catcaaccag gccaaaagca gacacagaca acgggtggaa cagcactttg  
97981 ctaataacaa ccgcggggag atgtggagag gcttcagaac catcacagac caccgggagca  
98041 gcatcagcga gaccactcat gaccccacc tgccctgacac tctaaacc tctttgac  
98101 gcttcgacac gcccggcagc agcagagact ctggctcctc attacagctg gaggaggagt  
98161 ccagactctc cgtcctgcag ctacatcagg tgagctccac tctgaggagg atcgacacca  
98221 gcaaagacgc aggaccagat aagggtgctg gtcgggttct gaagctgtgt gcatatcagc  
98281 tggctgaagt tttcccggac atcttcaatt ggtccgtgca gctcacctca gttcctgtgt  
98341 gcctcaagtc ctccatcatc gtgcccgtgc caaaaaagtc atctgtctcg tgccctcaatg  
98401 attaccggcc ggtcgctctg acaccctgta tcatgaagtg ctttgagagg atcatcttaa  
98461 accacatcaa ggacatcnnn nnnnnncac ggaatcaatt aaggggagag aatgtttgtc  
98521 tttgaacggt atttggttta acatcatctc cgacaggtga tgatgagggg ggaatgtgac  
98581 cttgagaatg tagttctcca tggcgacctt ttctgggtccg gagagattgt ataatttccc  
98641 cttggggaga ggagcaccgt ttaatagctc aatggagcaa tcgtacggtc ggtgagcg  
98701 aagtgaacta gccatagctt tactgaaaac cgtacaaaaga tcgtgataac aagcaggaa  
98761 attagacagg tcgatttctt tatcatgagc aggatcagga gcgtcacgaa tgggcaaggc  
98821 ggaatgatgc caagatggcg gcggcgcgtg cacatgcagc ggctcagcgc tctctgctt  
98881 tgtttgtttt tttcatgttt ttggtggtg tacagacact ggaagcgttt actcagtaca  
98941 gcaggacgga actacttcaa attagttggc attgtcaatt taatactccc ccaaagtcgg  
99001 actttatacc acccgagatc caacggactg gcacggcctt caccatatcc ccctgtggcc  
99061 aaggagacgg agaagacact gtaaacaaaa gcgggggagg agaagcggag cacgcgatg  
99121 gctacatgct aaccgcgcatc gaccagctct ccccagctc ttctctgcta acgtaagatc  
99181 actgcgcaac aaactggatg agtttcggtt acggattgtc tcgcggtcga tggacagctg  
99241 tgtggccatc ataacagaaa cctggctgga caataacaca cctaacgctg cgtgagctc  
99301 agcggaccgt tctttgttcc gcgcggtcgc gactgcagac tccgataagg gcagagcg  
99361 cggactggcg ctttacattc acaactcctg gtgtgcagcc acacacatca tcgnnnnnn  
99421 nnnacaccac aggggtgtgt cctcagcccc gccctcttca ctctgttcaac ccacgactgc  
99481 tccgctattc atttcacaaa cctgggtttta aagttcgccg acgacaccac cgtagtgggt

99541 ctcatatcca acaatgatga gactcactac agagaggaag ttcagcacct gacatgatgg  
99601 tgtgggtgaca acaacctcat cctgaacacc tccaagacca aagagatcat tgtggatttt  
99661 agaaggacta gaaaggtggc acacatcccc ctctcatta acagggagga ggtggagtgg  
99721 gtggaccaca tcaagttcct ggggatccat atcacatctg acctcacctg gtcgctgac  
99781 acatcccacc tggtagaaga ggctcagcag agactcttct ttctcagga gcttaaaagg  
99841 actggacttt catctcaact tctggggaac ttctacagag caaccattga gagcatctc  
99901 tgtctgagtg ctacgggtgtg gtacgggagc tgcactgctc aagacaggaa ggaattggcc  
99961 cgggtggtga aaaccgcaca ggacattgtg ggaggacctc tcccacaact caaaacacaa  
100021 aacaaagagt cgggaattctc caatgaaacg ttcgaatggg aggtgagtga taggatggga  
100081 agccagaaaa gcttggggccc ttactgcgga gagagttcac aattaatgaa atattgctgt  
100141 ggtcggcttg gtaatacctg ggagcctgat ggaaaatgag ttgacactgt agtaggaacc  
100201 ctccacaggt ttcaacatcg ctgtagaaag gttccggctg taggaggaca tttagaagtc  
100261 tttatataca aaggtgagtt ttctgcattt ctgataatag aaaatctcag aatttatgga  
100321 aaaatccaaa gtttgtctat taaaagttat taaatacatg tctattttgt gtaagagaag  
100381 acattgggat gatatttttc ataggctaat aaaatgtttt attgttagga aacacatttt  
100441 aaattaaaaa aggatcatal ttgataaata atttattttt tatgagctaa attattaata  
100501 aaccacattt gcaccaaag gttagagaca gctgttgatt cagatcagtt cctctttatc  
100561 tgaagaggt ttttgtacga cgttgtttca ctgtgtgaa ggtctgtgt caccctgtg  
100621 acagtaataa actcctgaat cttcagctg aactccactg atggtcagag tgtaatcact  
100681 gccagatcca cttccacgaa aacgatcaga aactccagac tgacgagttg ttgcataata  
100741 tatcaggagt ttaggagctt ctccagattt ctgaagatac cagtggatgt agttgcnnn  
100801 nnnnnnctcc tggacaaca gagtgagatc caggagtctg agtcacagtg atttcacctg  
100861 atgaacctgg aaaaaaggaa aaacagaaga gtcattgaga tgaatccaga tgaagaaat  
100921 ctaagaattg tgatgaagt tgtttcctga tgaatccaag tttccagca agagtctcac  
100981 cctgaacaag gagctccagg acagccagca gcagagttag tgacatctc attgtgctgc  
101041 aggtgtgtca gtgtctctga aaggtctgga cagccactga tcaacactga gctcttaact  
101101 gctggaagca gagaggcagc acacatatgc aaacacactg agtcagtcac ctgcagctgt  
101161 tctcagcagc tctggatgtt cagcttggaa tctttggcct acaggagctg cagcagcaca  
101221 actctggaat aaagactcca cactcagta ctttagcaga ttagattgtg attagaagca  
101281 tgtgttaaaa acgtagatgt tacataaaaa agaaaacaaa gtttgatctg aaggatcttt  
101341 tacttgtttg tgtctatatc ttctttccat agtcagggta cctggagaaa acccacacat  
101401 gcatgtgaag aacatctaaa ctccagactg aaagatctc actgggattt gaaccagaat  
101461 cttctttcca tgaggtgaga gaggtaacca ctactccact acaccaccaa gcagccctgc  
101521 tgccaacagc ttttgatata attttgttca tctaaatcag gagggtcaaa ctcgtttca  
101581 ctgagggcca catcagcata gtgtctgtcc tcaaagggcc agatataatt tattcatgta  
101641 actaaaatga atgaaaaata aatgcaacta ctctttaatg ttaaataact cattatttat  
101701 ttattataac tttttagagt gacaattaca gttgcataga aaacatagt ttgctgtta  
101761 ttgtagcata aatcctttta catttgattc tgtcaggtta ggttatatgg acagtgtta  
101821 agtcctaagt tatagttgac caatctgata tttcaagtcc aatctcccc tagattgaa  
101881 taagtacaca ccaattctta cttttaagaa attaaaaact gttatgctct cgcgggtaga  
101941 gctgtgacgt gtcggatttt tgatcaccgc ggtgatgaac caatccccg gcgcccgat  
102001 cagaaataaa tacaattaca acgtagtatt ccttattaac aaataacagt aacaactaac  
102061 tactacctat ctaactaatg aattaactat ataggtgttg tagattgact gtgactgtgt  
102121 gacgcgctg cgtcgtgtgt aggactagga ggaggagcgc tgcacacgtg tgtgggggt  
102181 gcgtgttgat tcttttgctc tctagctgca tgtgaggctt cacctgtgct ctctggtaca  
102241 gacatcttct cagaatatta tttattgccc agtaataaac agactgcaga cactgtcacc  
102301 tttcaggtag ccatgaagcc tgacacccat gaagaacgcg gggcaggagc ctccgccttt  
102361 aattatacag acacgtaacg ttgcgctgca caaaaaagt cccaaacaaa acatgtagtg  
102421 atattcatgg aaatctaaca gcgcgcgttc atgtttgggt ttacagagtg actgagaaac  
102481 agtaataaac tcccccaac acaaaatcct ccagcggcg gccgtgtcgc gcacttaaaa  
102541 acgcacgcag cgtgtaatgg aaatggaat aaatggaat taataattaa aaacgcagta  
102601 aatttgagac ggaaacttct gttgtagaat gaggatgtgt gcttctgaca gcgcgctccc  
102661 gtgtgtgtaa acggagccgc gtgcagcaga ggcagtgaga gcacgtcaag gagagagagt  
102721 gacaggcacg tgggagagaa ggagagaaca gtctgaaaaga aagaatgaaa gtctgaacac  
102781 aggactagca gaaagagtca attatcagca aagatgaatg tgtttaatgt gtttattata  
102841 gttccaatca cgcaccatata tcaaaacgta aaaaaaaaaa gtgcggtgat gctgtgatga  
102901 ggtcatcatc acagccctac tgcggggcca cataaaatga catggcgggc cacatttggc  
102961 ccgcgggctt tgagtttgac acatgtgatc taaatcatat gactggagtt taaagagaat  
103021 ttaaggatca ttttaaccaa accataaaga gaaaataaaa aaaaaacaga aatgttaaac  
103081 ttcatttaca tttgacaaat agaggctata aacacatttt tgtcccata tttatctgcat  
103141 tcgtttctag tttcttttaa tatgttaaat gaatctgttt ataaatgttg ctgatttga  
103201 agacttttta ggtcaaagaa aaccaactaa tataggaaac gtgtgtttaa aactgatggg  
103261 tataggtaac ataggtaaac ttttaagact taataaataa taaaaacaaa cttttgggt  
103321 gaaattgttt ttaaattatg cttgagtaact tttagctcag ctgttcagac agatcagacc  
103381 ctcttttagct taatgaggat tttgtatgat gtggtcgggt catcaggtcg actgatcatg  
103441 ttgatgatga tgatgagctt ggctgaggaa ggtcttcttc ttctgctct tgtctgagtc  
103501 agacacactt ttttctcctc ttaacttctt ctccactgag cctgtatctc ccattctgt  
103561 tcacccttct gcctttaatc attctgaaaa tggatttgat aagctgctct atgaattcaa



103621 tctacaacat tttgtcatcc tgagggttcag tctgtgtccag acgggacttt aacatctgga  
103681 tgtaccaaat attcatgggg tagatggagg ctgggtgttc tattccaacc gtctgtggat  
103741 gtatagctat ttagatgttt gatcatcggaa aaactccaaa acttgtttctg acaagatgat  
103801 ttctagattc cttggccatt ggggtcggag aatttctgat ttttctagaa gttgtgagc  
103861 agcaaacatc aagagagttg gagatttctg gtaaaacaaa ttgtgcagtt ctgactcaga  
103921 ctgagagact gttgctgctt caccagaaac tctactttac accagtgagg agtataaagt  
103981 ctatgaactg gtggaaaaat ggatcacaac tggagagaat ttctgcacag ataggaagaa  
104041 aactaaatcc aagttaccaa aaattggatt catagaacat ctcaaagact ccgtcagacc  
104101 agtgaaggac atgactgcta gacggagaaa caagtctgct gtgatctgac ctccctaagg  
104161 cttggagagt ttagcataat tttaaaactc ctcttttgt gttcagtggt tctacagtaa  
104221 atcagtcagt gtttcagctc ctggaagAAC ttgaggcaga aacattcaaa tgagttcag  
104281 ttcattctga tgaaggaggt ttttgtacga tgacttttca ctgtgtgAAC acatactgac  
104341 tgttgatcca gtgataactc tgacagtaat aaactcctga atcttcagcc tggactccac  
104401 tgatggctcag agtgaagtca attccatcct ctgatccact tccactgatt ctggaggaga  
104461 ttcctgataa tctgtcagat gttctataaa tcagagcttt aggagcttct ccagatttct  
104521 gatggtacca ggcaagatag tattgtgaac cagtgtagtg agctactttt tgactggcct  
104581 tacagctctat agtgacctct tgattgagct gcaactgatt agctgtggc tgagtcaaa  
104641 caacattttg tccaacagaa cctgcagaga gagaagaacc acaaagaaa tgagttctg  
104701 aggagaaact cagctgcact ccagatgatt ctcacatgac acaaacatca tcttctcac  
104761 cctgaatgaa gcagaggaga gtccagatga ggacgcagat caaagtcatg gtttgactga  
104821 ggaggaggag gaggatttct gtgtcttctg ctgtgatgaa ggacagctgt cagtcacca  
104881 gtcttcaact ctcaaggacta taaagtctcc cagagcactg gagcatggag ctgctgatgc  
104941 aaagtgtttc tatggaaatg caaccactga ctccaacagg aacatggatc tdtgtcatca  
105001 ggattcactt caatggatca atcaatcatt ccagatggga tccaataa tttgattatg  
105061 ctcaaatata atgtttgttt ttaccactac tacaagaacc tttacatcaa caaataaga  
105121 acttaagtag aaattaagct aaatttagct gaaaaataa aaaactattg ttattattat  
105181 ttcagtaaca acttttttca catcaatccg ttgttttcca gtcagactgt gttgagttt  
105241 ttgtgttcaa agtcagagag cgtgtctctc tgcagtcaga ggtttttcta cgacgactca  
105301 gttagtttgt atcactgtgg tacacgtttg gtggaggAAC cagactggag gttgattgta  
105361 agtaatttat tttctattta catccatggt ttaacaaaaa gtgtttttt taagtaccat  
105421 gaactaatat ttgtctactt gtatgatttt cacagattta gtttattca atattgcann  
105481 nnnnnnnnaa tctgtgaact ttgttagata tttttaacct ttaacaatct gctaaagaaa  
105541 atgttatacc acattttgaa aatattcctt taaaaaaatt gattctgttt atttctcacc  
105601 aaagaaataa acaaatgtga aaaaaaatat gtttttttcc agttgggttg ttttaagtta  
105661 agtgcagtaa gtttataact caaagatcct tttcttattt tacgttaaga atgaaacctg  
105721 tttgttgatg tggttcattg gtgaagctca tctgttgcca tggttacag acctaaagaa  
105781 ggaagtgaaa cattgaaaaa agtgttaaac taactgaaga aataaagcag ctgctgtctg  
105841 caggaagagt ttctgttctc tttggatgat ttctcatgaa cttgtttgtg tctcctcatg  
105901 cagtgggtca tgttcccccc aagctgacag tgctgtcccc ctccatgcat gaggggaaagg  
105961 ccacactcct gtgtctggcc aacaatggct tcccttcagg ctggactctg tcttggaaagg  
106021 tgggcccagc cagcatcagc agcagctggg aggagagcag gagccccggg gtgctgcaga  
106081 aggacggcct ctacagctgg agcagcacc ccaggctccc tgcagaccag tgggagaagc  
106141 tggactctgt gacctgtgag gccaccagg actcccagac tccagtcata gagactctgt  
106201 ggagaaacca gtgttccctag tcaccactg actgactggg attcttttac tttgttttaa  
106261 actattctga ctttnnnnnn nnnnctattt tgactttact ttgtaactct tgtggcattt  
106321 attttcatca tcattttgaa tgttgggaat gcttctttt ttttttttaa ataaagattt  
106381 ttttcttcaa cttaactctg gtttgttacg ttttttcaca ttcagacatg tttttgatca  
106441 acaaatttaa aataatgaca atttatttta aaaatttaaa atacatttt aaaataaata  
106501 caatttattt taaaaaagt tagtataat aaagtatagt atatagtata gtataggata  
106561 tttatattat atttttacat ttctaagga acatactaac tttattgtct attagttgac  
106621 agacttctgc agctctacac tccaacatca tcatcactga ggtcatattt gtgctgtgac  
106681 tttgtaaacc agagtccata gaaaatgtgt tttactaac gtatcagttc ctctgtaca  
106741 cctctgaatg ttttctgat gagaacgctt acaaaacttt cttttcacat cttaatatc  
106801 cgacagttga accagatgta gctgctctat tggataagcc tttcactgct gaagaactaa  
106861 agaatgctgt catgtctatg caggatggga aaagccctgg tcttaggttt occatthta  
106921 atttttaaagg cttttatgga taaactatcc gctctaagc ttaacatggt aaaggctca  
106981 gcagatcttt teggctactt tgcgacagc acaatctctc ttatcctaaa gaaagataaa  
107041 gatctgcatg gctgcagcag atateggcct atatecttgc tgtgtgcaga tgttaacatt  
107101 ttagcaaaaat tgctagcaaa acacttggag ctgataattc ccacattaat cagtctgac  
107161 caaactagct ttattaaaac cagacatcct ataataatag gcggcttatg aatattttac  
107221 actgcacctc tccaactagc acccccgaaa tggctcatctc catggatgct gaaatggcct  
107281 ttgatggggt ggagtgccct tacctgtttt gtactcagag atgctttggc tttggatcta  
107341 aattcctatc atggatcaaa ttactgtaca catcacctat gacacgtgtg tgcactata  
107401 atgactactt ggaacgggta aaataggctg catcaaaat aatgtgctgc ctaactctc  
107461 ctattttttt caatgtctac cagtattcat tccaaagcaa attttacggt cccttgacaa  
107521 ttctattgcc caattctagc ctccaaggat gagaaaaact atattgcgga aaagcaatga  
107581 taatggcggc ctacaggagc tgcagcaaca caactctgga ataaagactc tacactcagt  
107641 cacttttagca gattaccgta catttgtgtt cagatattct tgtaataagt tagatgttaa

107701 actagaaatg aaacattatt aacgtctagc ttgaaggaaa ttttcgatgt attttgcttt  
107761 atctgctatt catatctgag aaaatatttg tgtctaaatg agtttcattt tttttagta  
107821 aagcttaaat ttgcaaataa aaatatacaa atgttttatt gccagtgata tgaaccaatg  
107881 gttaaacca acatagtttc taaattcact tttgtctgaa tttttcctaa gttgggcaa  
107941 gcaaaactcca gtgagctcag agagttgaaat aacatcagac atcatctgtc tagtgtagaa  
108001 atgtctacag agcagaagca cagaagtatt tgttgagaa aatacataaa tgttgggtt  
108061 attgatata caagataaaa aattctgatt cctggtttca agctttttaa atgtaaggat  
108121 gatgaactca tgagtcctta gaaacaccag gagtctgtag cagagaagat tttctgtctt  
108181 tttcaaacat ctataaatcc atccatccat ccatccatcc acctgggatg gggcaccagt  
108241 tcatcacagg ccaacacaac cacacagtca tatctaggga caatttattc tcagcaacca  
108301 acatgtgatg cacagtcctg gactgtggaa gaaagatgtt tctggaataa agactactta  
108361 ttgaaacttt gttttacatt taaattgatt atcttctcca taattggtta atcggttctg  
108421 aagctgagag ggatagggtc cagttttatc tgtgaaccaa ttctatgact acatgtgaca  
108481 cagtaaagaa cctcgggtgtg attctagatg cagatctgag ctttgaccaa catgtgaatc  
108541 aaatgactaa atttacattt taccatctga ggaatgtcac cagagtgaga ccctttctct  
108601 ctggagcctg ggctgaaatc ttaatccatg cttttattac atccagaata cattattgta  
108661 atgcccctct ttctgggtga aagaaaacca ctcttaatca cctgcagta gtcagaact  
108721 ctgctgcagc ccttttaacg agaaccaggaa agagggagca cattaaccaa tcctaaaatc  
108781 tctgactgg ctccctgtca gcttcaggat tgattttaag attcttttaa tagtttttaa  
108841 gagtgtccat ggtcttagtc cttcttttat atcagacttg cttttaacgt atgaacctcc  
108901 cagaccctc aggtcctcag gtgcagccct gctgaaggtc cctagggtca ggacaaaaaa  
108961 ccacggcgag gactcgttta gattctacgg gcctcgtctg tggacagcc tacctgagga  
109021 tgtgagggcc tcatctactg ttgaggtttt taaaatgaaa ttaaagacac acctgtttaa  
109081 cccagctttt aaatagattt caaatctttt ctaagctaga attttcttt tttactcttc  
109141 tgttttatga tgttttatg catcatttta tcgttgtatt tgtttaatct agaattttta  
109201 ctcttatatt tcatattatt ttatcacata catatttatt taatgtcttt gagccaatta  
109261 gactgtttac gagtgttttt ccgttgatg tctgtgctga cacccaacgg gaagacaggg  
109321 cagacggcgc ctgctgggtt ctctttctc ttttacttgt gtttgtttt gtgaatttta  
109381 ttgtgccccg cttattttaa aattctattg catgaatggg gattgggtt ttctacattc  
109441 ttgttttttt ttatgtacag aacctagac tgtttttttt catgaaagg gttatagaac  
109501 taacaataaa tgattaactt ttgtccatta gcaaatctaa tagatttatg aaacagtgt  
109561 acttagtttt tgcattgacat tttcagtc aaatgattt tttttagaga taaatctcag  
109621 acagaagtta gtattaataa atgtccatcc cccatttttg agtatttata agaattcatta  
109681 ttaacaaaaa ctaagacaaa tactcaatc aaacttctt aagctttaat aaaagaacct  
109741 cagataaagg tactgctgtt tgattattgt gtctttctt gtgtgtttag tgtgtctaca  
109801 gtaaatcagt cagtgtttca gtctctggaa gaacttgagg cagaaacatt caaatgatt  
109861 tgcattcatt ctgatgaagg aggtttttgt acgatgact ttcactgtgt gaacacatcc  
109921 tgactgttga tactgtgata actctgacaa aaataaaact ctgaatcttc agcctggact  
109981 ccaactgatg tcagagtga gtcaattcca tttcctgat cacttccact gaactggag  
110041 gagattcctg aaaatctgtc tgatgttga tagatcaaag ctttaggagc ttctccagat  
110101 ttctgatggt accaggaaag caagtaatgg ggatcagtc attcataatc catgaaacaa  
110161 gagtaatcat cagtgcagag aaatacttgt tgactggctt tacagtctat agtgacctt  
110221 tggttgagct gcaactgatt agctgtggc tgagtcacaa caacattttg tccaacagaa  
110281 cctgcagaga gagaagaacc acaaagaaca tgagatgctg aggagaaact cctgaatgaa  
110341 ccagatgatt ctcacatgac acaaacatca tcttctcact cctgaatgaa gcagaggaga  
110401 gtccagatga ggacgcagat caaagtcatg gtttgactga ggaggaggag gaggatttct  
110461 gtgtcttctg ctgtgatgaa ggacagctgt cagtcatcca gtcttcaact ctcaggacta  
110521 taaagtctcc cagagcactg gagcatggag ctgctgatgc aaagtgtttc tatggaaatg  
110581 caaccactga ctccaacagg aacatggatc tctgtcatca ggattccat caatggatca  
110641 atcaactatt ccagatggga tttaaaaata ttgattcatg ttaaaata atattcgttt  
110701 ttcactacta gtacgtatta gaatacctt acatctgcaa aattaaaact taagtagaaa  
110761 ttaagctaaa acctgaaaaa aataaaaact tgtattatta tttcagtaat aaccttttc  
110821 acatcaatcc gttgttttcc agtcagactg tgttgagttt gttgtgttca aagtcagaga  
110881 gcgtgtctct ctgcagtcag aggtttttgt acgacgactc agttagtttg tatcactgtg  
110941 gtacacgttt ggtggaggaa ccagactgga ggttgattgt aagtaattta ttttcaattt  
111001 acatccatgt tnnnnnnnnn nnnnnnnnnn nnnnnnnnnn nnnnnnnnnn nnnnnnnnnn  
111061 nnnnnnnnnn nnnnnnnnnn nnnnnnnnnn nattaataaa taaaacaagt gacattttta  
111121 taaataaaat attgcacagc tgagctggag atgactggag cagcatagga accagaaagt  
111181 tttggacttg ttgacgtttt gagtgaatct cagctagaag gaaacaacaa cttaatagtc  
111241 ttagttatgc agatcatttc atgtggttta ttctttctt attaagacct aataaaaacc  
111301 aactagtctc agtgtccttt ctggttcccc ctggatgtac agcgtccttc acattctatt  
111361 attttatctc tgctactggc cggctctgca tgcatttact aaacctgcta tgtaaatggt  
111421 ggcatcactg catttgatga gtccatccag ttactgtcag tgaagggtg actacagtct  
111481 agacagtttg tcagtccatc acagaaacac acaaaaacac acaacaacac actcacatcc  
111541 acacgtaagg gtcaatgtag actaccaat taaccaactt ttattttttt atttgactg  
111601 agggagagag tttgtctatg tggagaaaac catcatctgc atgaggagaa catgcaaac  
111661 ccatatagaa agaaccggc tgggatttga accaaaacct cttactgtg aaatgagagt  
111721 gccaacgct acaccactgt gcggaccatt gattaagtta tatggatgta accttgtgc

111781 catcctaggg acgttaacat tgggagttgg gtcactctaga cccactagac agagctctga  
111841 accttttttc ttcaatgatt tgtaatcttc actgggtgtcc atgaattaca tgaaatcttt  
111901 ccacctttat ccacctttgt catggtaggg agaacacctc aatgtaaggg tgggggtcaac  
111961 taagatagca caagggttaa ttgaaataaa gaggtttatca aaaatacaat ctctgaagtt  
112021 tctttcatct ccatgaaccc aaattatatt tttcctgtga tcttttgcaa aaaataaaac  
112081 tgcattttgt ttaattatta atcattaaaa aatataataa cagttctgtc tgttctgtcc  
112141 ttcaatcaag ataagctttg tatagatgct gtaataaaaag tgtgtaataa atgaagaaat  
112201 gagcctcaaa cacaaatgaa aagaaggagc ttctgctgct tttgaagctt ttcaatcttc  
112261 ctccaatgaa atatgtcact aaagtgaatg aagtcctcac tgttttataa atattatctc  
112321 atatttttac ctgacaaaat aatacagaca ctttgatgga atataaagta gtgggtgtac  
112381 agtttgtaga tcgctgtaaa tgtttgtctc ctgaaaaaac acaaacatca atgtctgaac  
112441 ctctggtatc aaagtaaaaa taatgtctaa attgttataa gcattttttt cttctggcag  
112501 attcattgag gttgaaagat ttgagaatth atagaaaaat ccattattht tctattaaaa  
112561 tagagaagac atggatatga tattttgtaa aaggcaaaata aatgctttc atttttttaa  
112621 aacaaaaaat caaatcaaat ttgaaaaaaa aatttctttt ttatgaacta aattatcaat  
112681 aaaacacatt tgcaccaaga ggttgagagc agttgttcat tcagatcagt tcctctttag  
112741 ctgaaagagg tttttgtacg acattgtttc actgtgtgaa cggaaagctg ctgccctgct  
112801 gacagtaata aactcctgaa tctccagctc gaactccact gatggctcac ctccctcac  
112861 tgccaaatcc acttccacga aaacgatcag aaactccaga ctgacgattt gttgctaaat  
112921 aatcaggag tttaggagct tccccagatt tctgaagata ccagtgagc cagctaccaa  
112981 cacttgaact ggtttgacat ctaatggaga aagtttctcc tggacaaca gactgagatc  
113041 caggagtctg agtcaaagtg atttcacctg atgaacctgg aaaaaaggaa aaacagaaga  
113101 gtcatttgaga tgaatccaga tgaaagaaat ctaagaattg tgatgaagtt tgtttcctga  
113161 tgaatccaag tttccagcag agagtctcac cctgaacaag gagctccagg acagccagca  
113221 gcagagtcag tgacatcctc attgtgctgc aggtgtgtca gtgtctctga aaggtctgga  
113281 cagccactga tcaacactga gctcttaact gctggaagca gagaggcagc acacatatgc  
113341 aaacacactg agtcagtcac ctgcagctgt tctcagcacc tctggatgtt cagcttggaa  
113401 tctttggcct acaggagctg cagcagcaca actctggaat aaaaactcca cactcactca  
113461 cttctgatca cagattagaa taattattht aatgaattg ttgataggtt ggttgaatta  
113521 ataggtagtt tgcctctccc aggtggagta tcttggggtt ttgttcatga tagcaggaaa  
113581 ttcagagaga ttgaatgctg gattttagtg tcgtctgctg ttatgctgtt gttgtgcttg  
113641 tccatttttg tgtaaagaga tctgagtcag aaagcaaagc tctcaatgtg ctggttaatc  
113701 ttagttccaa tactcaccta tggtcataac ttaaagaacg aggtcctgaa tacaagcggc  
113761 tgaaatgagc ttcctctgca aggcggctgg tgctccctt gaaaaatagt gaaaacatgt  
113821 agaatttggc gatggaattc tcatgcaatg gtcacccca ggcccagaat ccagatttcc  
113881 acccttacta tacatgcatg atgtattht tttaaaatat taccagttt aaattgtaat  
113941 taacccttgt gctatcctag gcacttthaa attggaaatg gggctatcta gaccactag  
114001 acagtgctct gaagtttttt cttcaatgat ttattatctt cactggtgtc catggattac  
114061 atgaaatctt tgcacctttg tcatggtaga gaaaacacgg gtggggtcat aggatagcac  
114121 aaggggttaag agagagatgt gagttgcagt ctcccaaag ttaaaaacat tccctttat  
114181 ttattcattc tctcttcatt cattcttggg gatggtagag gcggtgctgc cagttcgcgc  
114241 ctatggtccc tctgacaatc accgggatca tcatgacaca tcatgctgg tagccagtgg  
114301 cgtttaaggt cttgcccaaa ggccctcact ggggtgatgtt aattgttcc cactgatatg  
114361 gtaattgccc cagtaccatt gttcattcct atcaaaccct ggattctct ggtagtctc  
114421 caccaccaac agagctaccc agccgcttta gcccggttat gattaggata aataaactga  
114481 caaaactgta ttggactaat aagggagcta agatcagttt caaagcaaaa tgggtctatt  
114541 tttgccatcc tatttagagg aaacatcatc agtaggaaac attggaaaga taattcagaa  
114601 caaaaactga ttaaatthca actaaataat tataacactt gttcatgtct gtaatgagat  
114661 ttaatatcag ttgtgttttc cagtcagatt gtgttgagtt tgttgtgttc aaagtcaag  
114721 agcgtgtctc tctgcagca gaggthtttg tacgacgact cagttagttt gtatcactgt  
114781 ggtggacttt tggtggagga accagactgg aggttgattg taagtaaat attttcaatt  
114841 tccatccatt ttttaacaaa aagtgtttct attaaacct aaactaacat ttgtctactc  
114901 gtaagatttt cacagatttc gttttttcat ataatgcagg aaacattcac agatgcagat  
114961 aaacgtgatt ccatttgaac atcatttctc agtaatttgt ctgt

//

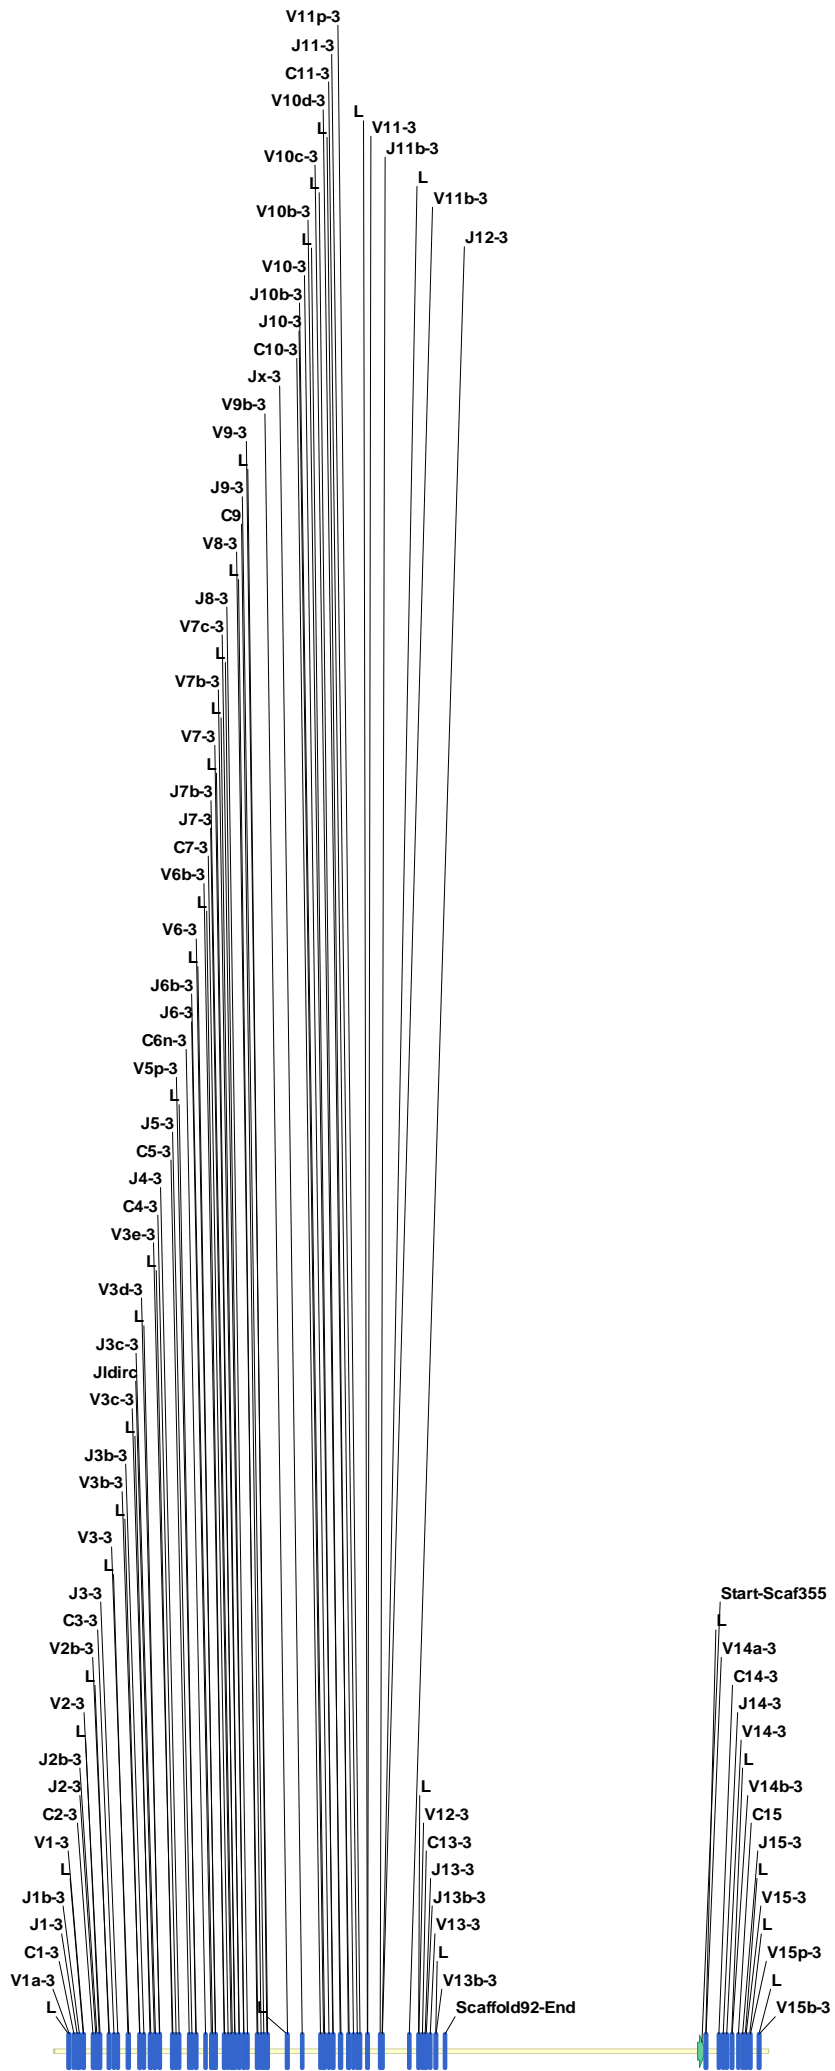

**IGL3**  
221644 bp

**LOCUS** IGL3 221644 bp DNA linear  
**DEFINITION** Medaka Immunoglobulin light chain locus 3.  
**SOURCE** Oryzias latipes (Japanese medaka)  
**ORGANISM** Oryzias latipes  
Eukaryota; Metazoa; Chordata; Craniata; Vertebrata; Euteleostomi;  
Actinopterygii; Neopterygii; Teleostei; Euteleostei; Neoteleostei;  
Acanthomorpha; Acanthopterygii; Percomorpha; Atherinomorpha;  
Beloniformes; Adrianichthyidae; Oryziinae; Oryzias.  
**REFERENCE** 1 (bases 1 to 221644)  
**FEATURES** Location/Qualifiers  
source 1..221644  
/organism="Oryzias latipes"  
/mol\_type="genomic DNA"  
misc\_feature 4325..4376  
/note="Region: Leader"  
V\_segment 4484..4798  
/product="V1a-3"  
C\_region complement(5966..6270)  
/product="C1-3"  
J\_segment complement(6888..6921)  
/product="J1-3"  
J\_segment complement(7656..7695)  
/product="J1b-3"  
misc\_feature 8866..8917  
/note="Region: Leader"  
V\_segment 9025..9339  
/product="V1-3"  
C\_region complement(11826..12136)  
/product="C2-3"  
J\_segment complement(12755..12790)  
/product="J2-3"  
J\_segment complement(13100..13137)  
/product="J2b-3"  
misc\_feature 13833..13889  
/note="Region: Leader"  
V\_segment 14057..14362  
/product="V2-3"  
misc\_feature 16808..16859  
/note="Region: Leader"  
V\_segment 16967..17278  
/product="V2b-3"  
C\_region complement(18328..18647)  
/product="C3-3"  
J\_segment complement(19543..19580)  
/product="J3-3"  
misc\_feature 22763..22814  
/note="Region: Leader"  
V\_segment 22922..23233  
/product="V3-3"  
misc\_feature 26348..26399  
/note="Region: Leader"

V\_segment 26507..26830  
/product="V3b-3"  
J\_segment complement(27710..27747)  
/product="J3b-3"  
misc\_feature 29609..29660  
/note="Region: Leader"  
V\_segment 29769..30083  
/product="V3c-3"  
J\_segment complement(30928..30962)  
/product="J1"  
J\_segment complement(31254..31291)  
/product="J3c-3"  
misc\_feature 32482..32533  
/note="Region: Leader"  
V\_segment 32641..32958  
/product="V3d-3"  
misc\_feature 36483..36534  
/note="Region: Leader"  
V\_segment 36642..36959  
/product="V3e-3"  
C\_region complement(37638..37948)  
/product="C4-3"  
J\_segment complement(38593..38630)  
/product="J4-3"  
C\_region complement(41799..42148)  
/product="C5-3"  
J\_segment complement(42546..42583)  
/product="J5-3"  
misc\_feature 43758..43809  
/note="Region: Leader"  
V\_segment 43919..44223  
/product="V5p-3"  
/note="It has stop codons. It is a pseudogen."  
C\_region complement(46839..47051)  
/product="C6n-3"  
/note="The sequence is not complete."  
J\_segment complement(48594..48631)  
/product="J6-3"  
J\_segment complement(48948..48985)  
/product="J6b-3"  
misc\_feature 49783..49803  
/note="Region: Leader"  
V\_segment 49998..50306  
/product="V6-3"  
misc\_feature 52617..52668  
/note="Region: Leader"  
V\_segment 52776..53090  
/product="V6b-3"  
C\_region complement(53792..54108)  
/product="C7-3"  
J\_segment complement(54729..54768)

|              |                                                            |
|--------------|------------------------------------------------------------|
| J_segment    | /product="J7-3"<br>complement(55083..55120)                |
| misc_feature | /product="J7b-3"<br>55804..55849<br>/note="Region: Leader" |
| V_segment    | 56015..56311<br>/product="V7-3"                            |
| misc_feature | 57194..57245<br>/note="Region: Leader"                     |
| V_segment    | 57353..57661<br>/product="V7b-3"                           |
| misc_feature | 58581..58632<br>/note="Region: Leader"                     |
| V_segment    | 58740..59025<br>/product="V7c-3"                           |
| J_segment    | complement(59872..59909)<br>/product="J8-3"                |
| misc_feature | 62882..62933<br>/note="Region: Leader"                     |
| V_segment    | 63041..63355<br>/product="V8-3"                            |
| C_region     | complement(64060..64376)<br>/product="C9-3"                |
| J_segment    | complement(64934..64971)<br>/product="J9-3"                |
| misc_feature | 65819..65870<br>/note="Region: Leader"                     |
| V_segment    | 66036..66288<br>/product="V9-3"                            |
| misc_feature | 72098..72149<br>/note="Region: Leader"                     |
| V_segment    | 72257..72571<br>/product="V9b-3"                           |
| J_segment    | complement(76867..76920)<br>/product="Jx-3"                |
| C_region     | complement(82500..82810)<br>/product="C10-3"               |
| J_segment    | complement(83456..83493)<br>/product="J10-3"               |
| J_segment    | complement(83815..83852)<br>/product="J10b-3"              |
| V_segment    | 85101..85415<br>/product="V10-3"                           |
| misc_feature | 86300..86351<br>/note="Region: Leader"                     |
| V_segment    | 86459..86773<br>/product="V10b-3"                          |
| misc_feature | 88674..88725<br>/note="Region: Leader"                     |
| V_segment    | 88833..89147<br>/product="V10c-3"                          |

misc\_feature 91181..91232  
 /note="Region: Leader"  
 V\_segment 91340..91654  
 /product="V10d-3"  
 C\_region complement(92663..92976)  
 /product="C11-3"  
 J\_segment complement(93916..93953)  
 /product="J11-3"  
 V\_segment 94752..95042  
 /product="V11p-3"  
 /note="Several stop codons. It is a pseudogen."  
 misc\_feature 97061..97112  
 /note="Region: Leader"  
 V\_segment 97220..97543  
 /product="V11-3"  
 J\_segment complement(100974..101011)  
 /product="J11b-3"  
 misc\_feature 101601..101652  
 /note="Region: Leader"  
 V\_segment 101760..102074  
 /product="V11b-3"  
 J\_segment complement(110064..110101)  
 /product="J12-3"  
 misc\_feature 112946..112997  
 /note="Region: Leader"  
 V\_segment 113105..113419  
 /product="V12-3"  
 C\_region complement(114129..114439)  
 /product="C13-3"  
 J\_segment complement(115048..115089)  
 /product="J13-3"  
 J\_segment complement(115402..115439)  
 /product="J13b-3"  
 V\_segment 116520..116819  
 /product="V13-3"  
 misc\_feature 118223..118274  
 /note="Region: Leader"  
 V\_segment 118382..118696  
 /product="V13b-3"  
 misc\_feature 121150  
 /note="The end of the Scaffold 92"  
 misc\_feature 199591  
 /note="The Scaffold 355 starts"  
 misc\_feature 202121..202172  
 /note="Region: Leader"  
 V\_segment 202280..202594  
 /product="V14a-3"  
 C\_region complement(206202..206515)  
 /product="C14-3"  
 J\_segment complement(207486..207523)  
 /product="J14-3"



```

misc_feature      208371..208422
                  /note="Region: Leader"
V_segment        208627..208926
                  /product="V14-3"
misc_feature      210187..210238
                  /note="Region: Leader"
V_segment        210346..210660
                  /product="V14b-3"
C_region         complement(212229..212542)
                  /product="C15-3"
J_segment        complement(213512..213549)
                  /product="J15-3"
misc_feature      214400..214451
                  /note="Region: Leader"
V_segment        214617..214913
                  /product="V15-3"
misc_feature      215771..215822
                  /note="Region: Leader"
V_segment        215932..216245
                  /product="V15p-3"
                  /note="It presents stop codons. It is considered as a
pseudogen."
misc_feature      218559..218610
                  /note="Region: Leader"
V_segment        218718..219032
                  /product="V15b-3"

```

BASE COUNT 43090 a 27063 c 25479 g 41679 t 84333 others

ORIGIN

```

1  aacaacctgt  tggtttctat  aaaatgctgc  ttcagctccg  gattagacca  gcttcacctg
61  aacgcagcgc  gacagcagag  aaggataaag  tctagagggg  gtcttcatga  agtctgtttt
121  tttgcagcaa  atgctattct  ggaaccagat  tttttttttt  ttaaacaata  agaaacccaa
181  aaggtttcca  aattaatgtc  ctttattaac  ttggaagaag  gtgactgaaa  catttataac
241  aatthcttta  atthttcccc  tttgthtgat  atthtcagcaa  atgcttaaaa  tgctgtthta
301  aaaattctct  ggactggaca  aaagattttt  ttgthttctt  gtatthttct  ctaaaaaaaa
361  taaagtctat  attgatgaga  ctctaagttt  ataattactc  tctaattcag  agatattgca
421  aaaatctatg  thtttaattat  tcatthttatt  thtttacttt  caaathtaac  caatggctgt
481  tggcatttgt  catttgtctg  tcatctaaact  thttatthtt  agaaaaaaaa  agcaaaaatc
541  taaactgaat  thattthtaaga  cttctactaa  agaaaacagc  cagatthttcc  aagcttagct
601  gactthttgat  caggacttgc  tgaaatgaaa  atgaaatgaa  aatgaaaaca  aaaaatttgt
661  gtctgtctca  cagaatattt  agaaaattgt  gtaaatttaa  thtaccgtct  caataaatat
721  acgthttcag  tgthtaattt  cagthtaata  tattaatgag  taagaatatt  atgcgtcatt
781  gthtaatact  acagggthta  agatgaacta  aagaattatg  cagacaatag  cctaagaaa
841  gagtattcat  gtctaaactc  acaagtcact  ttgtgaggta  caactgctca  thattgcaaa
901  thttctaatca  gccaatcaca  tggcagcaac  ccaatgcgtt  tacacatgta  aagatggctc
961  agacgacatg  ctgcagttca  aacttaggat  cagaatgaga  aataaaggth  attgaagtga
1021  cthttgaatgt  ggcathgtht  ttggtaccag  acgtgctggt  ctgagtactt  cagaaactgc
1081  tgatcaactg  ggatthttcac  ccacaacct  ctctgggatt  taccgagaaa  thttcaaaaa
1141  gagaaaatat  ccagthtagc  gcagthtcag  ggacggagat  gcatcgtth  tgctagaggt
1201  cagaggagaa  tggctcagact  gthttctagct  gatagacaac  agtacctcaa  ataacctgtg
1261  gthccaaccg  aggtctgcag  aagagcatct  ctaaatgcac  aacatgtaca  acctggaggc
1321  agatggacta  cagcagcaga  aaaccacacc  gggthgtcaat  aatgthcagct  aagaacagga
1381  gactgaggct  acaattcaca  cagactcacc  aaaaacaaatc  tagthctgatg  agthctccatt
1441  thctctgcc  cattthggatg  gthaggthcag  aatththgaa  caacaacatg  aaagcataga
1501  thcatctctgc  ctthgatcag  thgthtcaggc  thgthtagth  gthgthcatg  thgthgggaca
1561  atthttctth  cagactthcta  cthtttagth  caactgagca  thgthccaac  actacagact
1621  acctgagth  thgththtgac  cacatccatc  cthtttagth  cacagthgac  catctthctga
1681  thgthctact  ctactacagc  thgthctact  thgthctggct  cacgagctaa  gththcaccta
1741  catctcagaa  atththtagat  atthththgac  gggthththg  gththggat  ththgthgtaa
1801  thaatgaagth  thaatththg  agaactgact  aaaaactctg  thgththctg  cggctagact

```

1861 gacagggtttt tcacctgccc tgggttgacc cccacaaatt tacactggga caccacgtca  
1921 cgtgatcgac ggcaacagct gtgggtgatgt cagccgttat gggtcacgtg ggatgaccta  
1981 attgggtgtt ttatthttatc ttctgctctt ttagcagctt cttttggagg ctgaaattgc  
2041 aaacatttga gaatcgactg aaaaaagatg tggattttct gtttttata ttaaatthtt  
2101 caataaacat ggtaattgaa ctgacagatg cagaaaagaag agaaaaactt aatcaaatct  
2161 gcttctgtgt ttccggctcg acgctaaacg aatatgttgg acggatttat taccacagga  
2221 gagtgccatc aatcaatcaa gacaattcag tggaaagttg gacttttctt ctagtgtcgg  
2281 ttcaagggtg ttggagttag atcaggatca gtttaaaatg cgaagaataa ttcaatataa  
2341 aaatthaaata ttgatgggaa ttttacagat aatctthaaaga aaatagccag ccgttgctcc  
2401 gactthcaaca caaaacttta tgaatctaag tattgtgaag aaactactaa tctctthtta  
2461 gaatctctca cagaaactta ggtcattgat actgatttga aggaatcctg tggaaatagg  
2521 ctattgaaaa cctcaaatg tgtaaatttc catgtacaaa cgtctgaaaa aacttacaaa  
2581 acattctctc aaagacttgc tcttttctt ctccatctct ttttgaaaa cttagacaac  
2641 actttccttc ctctactta aaccagggc cttataacat taataccaa acctaaaaag  
2701 gattaactcc tcatagacaa ttgggtgtcca atctgactgt ataataatga ttataaaata  
2761 cttgccttaa tctttgctga aagaataaaa aaagtttcgg atcatataat taatgaaact  
2821 catgagtctg acttcatgag ttcatgatct tacataatat catatcagta cttgattaa  
2881 ttgattattc agattattgc cccgataaat gtttaatcct ttttctacc ttttacaag  
2941 cctttgatac aattgaacac aacttgacca catgtgtcaa actcaaggcc cgggggcca  
3001 atgtggccct ccatgtcatt ttgtgtggcc cgcaagagca taaaagttt tattttttta  
3061 taataaattt tttataataa tataataaaa attgatgtgt atttttttaa ttttagggg  
3121 aatcagactt gaaatctcgg attggacaac tatacatcag aacgtaaaaca ctgtcaaaat  
3181 aaactaacct cagaatcaaa tttaaacata tgctttctat gcaactgta ttgtcacttt  
3241 aaaaagtatt agtaataaaa taatgatata ttaaacatta aggagcagt agatttttt  
3301 ttcattacat ttacatgcta tatatacaag ttatatctgg cccttagagg acagccgcta  
3361 tgctgatgtg gccctcattg aaaataagtt tgacaccct gaactagact cagtagtaga  
3421 ggtaccacta ggtgctagat atagttgggg tcacctccat gcaaatttcc aaacttagtt  
3481 acttgtgagg ggttgactc tttaccattc tggaggtgtg catggtgaga ggtggcagtc  
3541 cagctctgta tgaccagagc aggagcttgg ttcaaataac cggcagtaag ttggacctgt  
3601 tactagtgca tactggactc tggaaagatt gcccttgatc actggatctg ttcatagtct  
3661 ttattggatt ttctgtatt agataaaacc acagaaatgc agagacatg atgtggatgt  
3721 ttcactgtgg ctccatgaga gagcagcaga gtcacataaa aagcaaaaat gctgttttt  
3781 ttctcagttt cagtttgctg aacatgtaaa aaagacctct gactttcttg ttttgccaca  
3841 ggagacaagc ttcactgatg aaccatgaca ccaggatgtt actttacata ttgaacaaag  
3901 tctagaacac tggggctctg ttctggaaga aaaactcttt ttctttttat attgaatact  
3961 ttatttttaag cccagaaatc actccttaat cactttctct gttaaaaaca gtaaattcaa  
4021 tcaattcaat agggacaata catagaaatc gttaaaataa tttattgaaa taaaagagaa  
4081 aaaagctgtc attttagaca tctctcattt gattaattac catagtgtga tgaagatgat  
4141 ccatgttctt gttggagtca gtggtagcat ttccatagag acactttgca tcagcagctc  
4201 catgctccag tgctctggga gactttatag tcttgagagt tgaagactgg atgactgaca  
4261 gctgtccttc atcacagcag aagacacaca aatcctcctc ctcatcatca tcatcatcca  
4321 aaacatgact gtgatctgca tctcatctg gactctctc tgctgtgct tccacaggtaa  
4381 agccagagaa atccaactcc tctctctat gaacatccgt ccctctgaaa tgaaggccac  
4441 aaaagctga agctgcttct tgtttctgat tctgtatcct cagagtcag aggcaggtc  
4501 acagtgactc agcctggagc agtgagctct gctgtggaag gatctgtctc catctcatgt  
4561 acaaccagtc aggatgttca tggcaacaac tatttagcct ggtaccaaca gaaagatgga  
4621 gaatctccta aactactaat ttactatgct agcactcag catcaggaac tccaactcgt  
4681 tttacaggca gtggatcaaa ctctgatttc actctgacca tcagtgaat tcaggctgaa  
4741 gatgcagcag tttattactg tttgggtgaa ttctacatca acagcaaat ctctttcaca  
4801 cagtgaaaaa cagtcgtaca aaaacctct tcagtcagag agaacagaaa ctgacatgac  
4861 acagttcaat gaagacacag agaagcacac acacacttt aagacaatg tgacagtata  
4921 cacgctttca ttaaattcta caccgtcaga aaatttcaga tcccaaagtt acaagaatc  
4981 ttagtaagaa tttthaaata acacaatcat aacactthaa atattthaaa cttacaatct  
5041 ataaaccact tttcatgaaa actaagcctt cagtgttgaa aatgaaacat gttttatttt  
5101 tatacttcac atatttctat ttgatcccca gaaaaatgtt cctgtgattt ggttcacgtt  
5161 cattcatgtg ggctccatct accaatagta gatatgctgg ttgtcatggc gattacctga  
5221 cctgattctt cccacatga taccgtcttt aaaggccatt taatttttt ttaataaatt  
5281 aatgcttaat tctgttcttc tagccaaatg tgagctcatc tgtccagcca ccctacagag  
5341 gaagctcatt tcagccactt ctattctgga ccctgttctt tcagtcatga ccagagcta  
5401 acgaccatag gtgagtattg ggacctcctc tgtgcacccc caccttaacg tgggtgaaaa  
5461 gtttgagagc ttgagtaatc ccagtagcta aactgtctgg ggcttaagcc cctggaaggg  
5521 tctcccatga caggcaggtc ctgggtgacg agtcagacag agagtggttc tgcagtacc  
5581 agttacgtca cccgaattgg cctcacggg gcccatgca gtcacaaat cagctctctg  
5641 tctgtcaact cagaggtttg tttagctctt ttagcattct ccagacatca gctgctggt  
5701 gtttacatta accagaacaa cctgttgact ttgtccgttt tgatgtaatc tggagctgt  
5761 tcttttgagg aagtatttgg atgatattcg acagttttca cattaatthaa ttttttcagt  
5821 tgtcctthaa acctttatgc taatcaacca caatgaagca aatcaaaaaga accgaagag  
5881 ataaatgttt ttgtthaaat ctttgtaaat tcaataatag aagaaagatt acttcaaaaa

5941 cgtaaagata aaaaaaaaaa aacgttcaaa ataaggtata aaaagnnnnn nnnnncaga  
6001 ctggacgggt ggatcctctc ttggcctgac aggtcacctt ctcccactgg tctgcagaga  
6061 gcctcagggt gctgctccag ctgtagagct cgtcctctcg cagcaccctt gggctcctgc  
6121 tctcctccca gctgctgctg ccgactacct ccaggacag agtccagctg gaggggaagc  
6181 ccttgttggc cacacacatg agtgtggcct tcccctgctg cagctcattc atggagggg  
6241 acagcactgt cagcaagggc gacgcatcac ctaggagaca ccaatcagct tagaggacag  
6301 gaaccacaca gctgtcaatc aaaaagctct cattggatgc agtggtttca gtttgaagaa  
6361 ggtttctgtt caggtgtttt tctgctccat cagtcattga ttcacacatt gtttcaactc  
6421 ctggaagaaa tctctcatgc agatcagcaa cgagacaaac ttcagtttct actgaaaaat  
6481 gtcaaaactgg gttagaaaaa gagcagatgc atcttcatgt agaaaaaag tttggactga  
6541 atgtctttaa aaagcttcat catacattaa agagatgtag aaataaggac aaaaacacaa  
6601 caatcatgtc agttttttgt gtcttggtga aattccttaa acaaaaataa aaaatagata  
6661 ttttgaagta aaataaactt taaaatctat tttgaaagat aaactaacta actaatgat  
6721 gctcactgtg tccacataat acctaattta tgctttaaca caacacaatg tttataaaag  
6781 agacataaac aatagtagga tgttgattaa aaaataaacc ttttcttca tttctgttaa  
6841 atttgatttg acacaactaa atattcaggt aatattttaa aattcacaaa cttctagtct  
6901 ggtttctcca ttaaagtcca tcacagtatg acaaactgac tgtaatctcg taaaaaatc  
6961 tctgacttta cagatgctct ctctgactgt caatctaac taaatgttct aatttgttt  
7021 ttttctgctt aaaagacata ttttatttca taattaaggg aaggcatttt tatggttggt  
7081 ttcacacaga ttaagtttgt tttaaaagaa aaaaaagaaa gattatgtca tgtgggggag  
7141 gctcgagagc cggtaggacc cagacgcagg ggcgggagc aaacgggttc agtgctagag  
7201 ggtttaatta taacaaatgg cgctgcagag caggatgaca acaacaaaac aaaaactcac  
7261 tgtggcgtgg cgaggcatga aacatgagtg tggcaaaaac atggagacat gaacaccatg  
7321 acaaaaggta atggaccagc acaggagaa ggcaagaca agactttaat acagacaggy  
7381 cagacaagac acaggtggac acgatcaggg ctgatgggga ccaaaggaag taaaactcaa  
7441 gaaacaagac aagacaagac ctttcaaaat aaaacaggaa acagaaccaa accatgacag  
7501 aacaagacag aaagcaaaaa ccaatacaaa agaaactcaa accatgacag attaaaaagg  
7561 aaaaaactac ataatactta cagatatttt aaaatctgat aggaaaaata tgtaatagat  
7621 caaaaaatac aaaagcgaca aagactttta cttacttcca acatccagtc tggttcctcc  
7681 accaaagtc caccacagtg atacaaactg attgaaagct cgtacaaaag cctctgactg  
7741 tacagagata cactctctga ctctgaaaac acaaaactca actgaaaaaa tggtagaaaa  
7801 tctaaaaata aaacatctta gttttagaaa ttaaattttt cttaggttat aataaataaa  
7861 taaactagta attgtttaat gatattctca ctgcagtaac taatgtaac attgctcagt  
7921 taaagctaaa tgaaagcaca accaccaaaa tgctaaaaaa atgtttaatg tctcttcta  
7981 aaaattagaa tgcattgccc aataagttta acagttttaa aatgtggctg caggtcatat  
8041 agatagatct acaactttac tgaaatccat gtttaaaacg ttgctctgca aaatcaattt  
8101 tctagtgata gcagtcagtc ttgactccac aaataattcc caccatgcat tgaaaaattt  
8161 tccactctta tgcagcaga atttctgtct ttaaatacaa taacagctg tgcagtcac  
8221 ttttaagtaaa acttcatttg gaaataaatc aacgttaaga atttatgaca aaaatgtttc  
8281 aacatgtctt aaaatgtggg ttctattgtc gtgctgattt ttgtcagctg tcatgtttca  
8341 tctacacatg aagataaagg aaataagtag ctgttatgtg tttccttgc acgctatgtt  
8401 tctaattgag tggtaatttt taaaatcact cagatctgaa tttatacatt tagacgcttc  
8461 agaaaaatg gaaacaaaat aaaaaaactc tcagaaattg aatacaaaaa caattataaa  
8521 aacacttcaa tgcctgata tcacattgaa cagctatgcy gtcattgat ttaaataagg  
8581 taaatagtgc ctccattatc atctgaaacc aagtatctct gctaagtatt tatttgttca  
8641 gaaaacatta cttccagttt tctgataatc ttgatgatga ggaggatcta tggtcattct  
8701 ggagtcaatg gtagcatttc catagagaca ctttgcatca gcagctccat gctccagtc  
8761 tctgggagac tttatagtcc tgagagttga agactggatg actgacagct gtccttcatc  
8821 acagcagaag acacagaaat cctcctctc atcctcatcc aaaacatgac tgtgatctgc  
8881 gtcctctctt ggactctcct ctgctgctgc ttcacaggtg aagtccagag aatccaactc  
8941 ctctcctcta tgaacatcca tccctctgaa atgaaggcca caaaagcatg aagctgcttt  
9001 ctgtttctgt ctctgtatcc tcagagtcca gaggacaggt cacagtgact cagcctggag  
9061 cagtgagctc tgcctgtggg ggatctgtct ccatctcatg tagaaccagt cacagggtgg  
9121 atgatggtac tgacctatcc tggtagcaac agaaagatgg agaaactcct aaactactaa  
9181 tttactatgc tagcactcga gcatcaggaa ctccaagtgc ttttacaggc agtggatcaa  
9241 actctgattt cactctgacc atcagtgtaa ttcaggctga agatgcagca gtttattact  
9301 gtttgggtga attctacatc aacagcaaat actcgttcc acagtgaaaa acagtctac  
9361 aaaaacctcc ttcagtcaga gagaacagaa acctaactga cacagttcaa tgaagacaca  
9421 gagaagcaca cacacacttt taagataata ttgacagtac gcgtgctttc attaaattct  
9481 acaccatctg aaaatttcag atcctaaact tacaagaat cttagaata atttttaaac  
9541 aacagaatct taagacttaa gatatttaag acttacaatc tataaaccac tgttcatgaa  
9601 aaataagcct ccagtgttga agatgaaaca tggtttattt ttatacttca catatttcta  
9661 tttgatcccc agaaaaatgt tcctgtgatt tggtttacgt tcattcatgt gggctctatc  
9721 taccaatagt tgatatgctg gttgtcagtg cgattacctg atctgattct tctccacatg  
9781 caactgtctt taaaggcatt ttattttatt atttatttaa tatgtcggaa tttaatatat  
9841 agaataatgt ggggtggggg tgaaagagaa taaaaggaag agagggtggag aaagtggggg  
9901 atacaggcac tgatttgaag aagttattat ttttaagctg aacaattata cgagatctgc  
9961 tggaaagaca aatattactt ccaaatgtga aattctgaca tgaagatgag cagaagatat

10021 ctgtccatca atacactgtg ggtaggagg agggatgaat cagaaagga gcagtgtggc  
10081 agtgtgcacg tgggggtgga gatacatgca tgctgccgaa gtcaaccgtg tcttcataag  
10141 ggaaccaga tccttcccag ccagataaag agagtgcggg agagatcccc aagccaggag  
10201 caccgccgga ccccgccccc ggcgggacc cccctacagg ggctccccg gtgcccaggag  
10261 ccataggcga acaccaaaca cagagacgtg ggccaaggac gaagccaggg cccagagcca  
10321 tgagccgccc accacacgac cggtgcccag tctctgcaag ccagccccgg caccgaccc  
10381 gaagaacca gagatcaccg cgcaaccaca gctccactac tctaccctct acagccctcc  
10441 tcacctgcta tgttctccga cccctcctcc catatcccc cagtgcctc cctactctgc  
10501 gatggggagg gagagcccca gaggatcccg atgagccggc cccaggtct gtcccacca  
10561 tgcactcttg cacacacact cgcaatattc tggttgccac ccaccctctg tcgccacgcy  
10621 gtaacctcct ccagccgatc gacccacac cgcacatgc cgaccacac tacagccagc  
10681 tggataccca ctttaaaggc attaaaaaaa aattaatcaa tacttatctt gttgttccga  
10741 gccaaacatg agctcatcca tccgtccatc catccatcca tcttctctg cttatccagg  
10801 accgggtcgc aggtgcagca ttctaagcat aaatgccag acttccctcg ccccgccac  
10861 ttctccagc tcctctgggg gggactctaa ggcgttccca ggccagccta cagacagtct  
10921 ctccagcgtg tctggatctt ccccggggccc tctgccagc gggacatgcc tggaacacct  
10981 cccagggag gcgtccagga ggcattcaga ctagatgcc ctagccacct aactggctg  
11041 tttctctccc taccctatct cttaggaagc acctagccac cctacagagg aagctcattt  
11101 cagccacttc tattctggac cctgttctct cggctatgat ccagagctca tgaccatagg  
11161 tgagtattgg aacctcctct gtgaaccgcc acgttaacgt ggtggaggag tttgagagct  
11221 tgagtaatcc cagtagctaa gctgtctggg gcttaagtcc ctggtagggt cccccatggc  
11281 aggcaggtcc tgggtgacga gtcagacaga gagattcaga agaccctcat gagaagcaca  
11341 atgaaggaca cagttacgtc acccggtatg gcgtcaccga ggccccatgc agtcaaatgc  
11401 atctctctgt ctgtcagctc agaggtttgc tagcgttctc ctgtcctcca gacatcagtc  
11461 tgctggctct catgaagggt cactttacc agaacaacct gttgactttg tctgttttag  
11521 tgacatctgg aagctgttcc tttgaggaag tatttggatg atattagatt tattagatag  
11581 ttttctctc aattgttgtt agtttgcatt ttgaatttgt ctttctctc tcaaacattt  
11641 atgccaaatta aacacattga agcaaaaaca cagaaactga ggaagaggtt cagtgtttt  
11701 atttaagcct ttataaatgc aacgatggaa gaaaaatgag ttcaaaaacg tataaaagat  
11761 gtcaagaaac ttttgaaga atttataaaa agcaatgaaa agagcagtta tgtaagctt  
11821 tcagttcagg actgggagca ctggtctctc ctgaaagtct ctaagactg atccttggat  
11881 cctctcttg cctgacaggt caccttctcc cactggtctg cagagagcct cagggtgctg  
11941 ctccagctgt agagggcctc cttctgcagc accccggggc tctgctctc tcccagctg  
12001 ctgctgccga ccaccttcca ggacagagtc cagtctgagg ggaagccctt gttggccaca  
12061 cacatgagtg tggccttccc ctgctgcagc tccttctgag agggggacag cactgtcagc  
12121 aagggcgagg catcacctag gagacacca tcagcttaga ggacaggaac cacacagctg  
12181 tcaatcaaaa agctctcatt ggatgcagtg gtttcagtt gaagaaggt tgtgttcagg  
12241 tgtttttctg ctccatcagt cattgattca cacattgttt cacttctctg aagaaatctc  
12301 tcatgcagat cagcaacaag acaaaactca gtttctactg aaaaatgtca aactgggtta  
12361 gaagagcaga tgcattctta tgaagaaac aagtttggac tgaatgtctt taaaagctt  
12421 catcatacat taaagagatg tacaattag gaaaaaaca caacaatcat gtcagtttc  
12481 agtcagaaaa tccttgaat aacaattaaa tattcagaaa ttttagatgc caaaaaatca  
12541 gtccagaatg aacatttttc agtaaaaaat gccttttcat acactatgac cacataaaca  
12601 tgcaattctt tttaaaaaac agactgttaa tagtaaatc tgtaacaaa aatacaactt  
12661 gtttaagttt aaatatttta actaaacaag agtttagttc caatcaataa aaactaaaac  
12721 ttaacctaaa tgtttcttca ggtaattatc aaacatttat tccagctctg tcttccacc  
12781 acaagttcac cactgtgata caaactgact aatgtgtttt acagaaacct ctgactgtac  
12841 agaggctttc tctccagctt tttttaaatt gaattaaata tttcaattt cttgattcac  
12901 atagaaatga tgatttatct tatgttaggc aacacaattt tgtattttca agtttcacac  
12961 agactaattc tttttataaa aaatgcattt taccaaaaat aatagaatgc ctttttcaa  
13021 agtatttttag taactcagga tcaattaaag aaggaaatca aacaagaaaa cataaaaagc  
13081 acaaaaaaga tctacttact tccaaactcc agtctggttc ctccaccaa agtccaccac  
13141 agtgatacaa actgattgaa gcgtcgtaca aaaacctctg actgtacaga gacacgctct  
13201 ctgactctga acaaaacaaa ctcaactgaa aaatggtaga aaatttaaaa ataacacatc  
13261 ttagtctcag aataaaaact aaattgtaag tcagctgtaa acaactttta atcatattc  
13321 tgcttaagaa acagttttta aaaataacta aattattat acatggcagc agcaccacct  
13381 gatcccaaaa cgtgctaaa ttttctcta caatttaaaa gaagatcatt tggactgatt  
13441 gagcaaaatc ccacaattca atgagttaca gagatgatgt aagtaaaaag tcaatgaatt  
13501 ctgtcttaaa tacaattaac cttggattta tttttgtact ctaaatttca cgttgaattc  
13561 tgggaaatat taaaagccct taagttttac ctcatagtta tatagacaca tctacaacaa  
13621 aaatgtctgt gcacgtgtgg ttttgtgagt gatagaatgt gtgtgtgtg aataatgtga  
13681 gtgtgcagga atcctgatga catgtggaga actgcagctt ctgactgatt cagtgtgtt  
13741 gcatatgtgt gctgcctctc tgcttcagc agttaaagct cagtgtgat cagtggcctg  
13801 ccagaccttt cagagacact gactgcgccg cagcacaatg atgatgtcac tgactctgct  
13861 gctcttcacc ctggagctcc tcgttcaggg tgagactgtc ttctggaagc tttgcttcaa  
13921 gcagcaacca ggttctccac aatgatgttc tgctgtgat gacaaacact gaaactagca  
13981 gcaactgagct tcttctctg cattttctt tgagctgtt ttgtctcaat aattctctc  
14041 tttttattgt tttcagcttc atcaggacaa ctgctgactc agtctggagc tcagtctgta

14101 gttcaaggac agactgtctc catcagatgt acaatcagtc aaagcactag ctactgcttt  
14161 aactggatc ttcagagacg ggcagaagcc cctaaacttc ttattttattg tacaactct  
14221 cgtcagctcg gagtttctga tcgtttcagc ggatcaggct ctggattaga ctacactctg  
14281 accatcagtg gagttcagcg tgaagatact gtagtctcagc actgtcagac tggcttcagc  
14341 atcaacagtc agtctgtgtt cacacagtga aaaactgttg tacaaaaacc tctttcagaa  
14401 actaagagaa tgacacagtt tactgaagac acaacacaca cacacacacc tacacacaca  
14461 caaacccaca cccacatgta atttattcag tttcttattt tatttttttac tgtgaacaga  
14521 ggttgggatg actgatccat ttaaattcaa ttttctaaat tcactaaact ttcagtttta  
14581 cgtcttactt caggtcagac tgttttcttt ttcttgtcag gattgagaac atttacttaa  
14641 acttaaggct cagccgtgtc tcagtggttc aggcagttga gcatgtcgga ggcagggcg  
14701 tttgatcccc accagtcaac tgttggttgt tcttgtgtc cctccctgcc tccagtgttg  
14761 atcctctggt cagggtagat taaaagttag aaaaataaat agaataaagt caaaagttaa  
14821 aagttaaaat tagaaaacaa acttacaagg catataaaaa tataagtatg agtaaaatat  
14881 gaacatgaat attgcagcga cccagtctgt acagaagaat tattgcacat agaattatg  
14941 cacatattat tgtttattgc acttagtgat tcagtcgggt ctcccttttc tgatgtcctt  
15001 tcccagaatt ctgattgtcg ttgggaagaa gctgctgtgg aagcgtgtgg tgtgtgtttg  
15061 gatgctttca ggcctgcgac gtctgaggt gtggcctgag tccacacgct tgatcagtg  
15121 gtgagcagg tggtgtctgt ctctgagact cttagagact ctccctctgc agcgtgtttc  
15181 gtagatgggt tccatggatg cgaggttgca acctataatt ttgccagctg tgttgatgac  
15241 cctctgcagc atctttctct cttaaatggt ggtatttccg aaccaggctg ttagtccgct  
15301 ggtgaggatg ctttccacaa gccccctgta ggcttgggtg agggctcgac gcttgagacc  
15361 agccttcttc agcagcctga tgaagtacaa cctctgctgg gctttcttca ctgtggcaac  
15421 agtatttctt tcccagctga ggctgtcaaa agggccatag gcgtgaacca cccccttgt  
15481 cagctctgcc tagggcaggt gtggcaggt cattagctta acatcaccca gtagaagg  
15541 gatgaatgaa taatgaacat acattataag cgcattgagc gtctggaaaa acgcagttaa  
15601 atccaatcca ttattattat tattaacat ctccacatcc atcaatgatt cactgactt  
15661 gctgcggctc taatttctct gtttcttct cacttctctg attgtttcat ctgtaagttg  
15721 atgtcatcaa acaaaaaact gcttcataaa actcctgtaa tttgtcagaa agctgctctc  
15781 atctttgggt ttagtggatc aaatattgac ctgagattta acgcagcatg aaaatgttta  
15841 aaaactcca ttgtttcatc catttatttg tattcatttc tattttatat cgtatggaaa  
15901 acttagtata cattcttggg aatgctgttt ttttggctcc acagaccttt tatcttacac  
15961 tacatcacat gatttcaaat acagaaacta tatttcagac tcagaatcag aagtacttta  
16021 ttgaccacac acgtaggaaa tttgtttttt tacagtagca ttgtaatat aaaagaaaat  
16081 agaataataa aaagaacaag taattgtaaa aaataataat tctgttttta agacaatgta  
16141 catattttga taaaaatctt ttcatttcat ttcagaatca aaatcagaag tactttattg  
16201 atcccacacg taggaaattt gtttgttaca gtagcattgt aatattcaag ataaatagaa  
16261 tataaaaaag aacaagtaat tgtaaaaaaa caacaacctt gtttttaaga caatgtacat  
16321 attttaataa aaatctatta atattttgtg agaatgttgg agttcatgtg gggtaggggt  
16381 tgtgaaggga gctatgtttg tgcaagagtt agaagatctt tatacaataa aaaacacaca  
16441 attataaaat aatagaattc ctctcattta gattaaacat tatgttcatg ttgcttgaat  
16501 aaggctcatt gcaactctat attaatccaa tcataaaaata aaaccaaat aatgaattta  
16561 acaaatccat gcaaaaacaac attttgttaa gagtattact ttcagtgaat tgagattcat  
16621 gatgatccat gttcctgttg gagtcagtg tagcatttcc atagagacac tttgcatcag  
16681 cagctccatg ctccagtgct ttgggagact ttatagctct gagagttgaa caatgtatga  
16741 ctgacagctg tcttcatca cagcagaaga cacagaaatc ctctcatca tcatcatcat  
16801 caaaaacatg actgtgatct gcgtcctcat ctggactctc ctctgctgct gcttcacagg  
16861 taaagtccag agaatccaac tctctcctc tatgaacatc cgtccctctg aaatgaaggc  
16921 cacaaaagca tgaagctgct ttctgtttct gtctctgtat cctcagagtc cagaggacag  
16981 gtcacagtga ctcagcctgg agcagtgagc tctgctgtgg gaggatctgt ctccatctca  
17041 tgtagaacca gtgaggatgt ttatagcaac catttctcct ggtatcaaca gaaagatgga  
17101 gaagccccga aacgactaat ttaactatatt agcactcgag catcaggaac tccaactcgt  
17161 tttacaggca gtggatcaaa ctcagatttc actctgacca tcagtggaaat tcaggctgaa  
17221 gatgcagcag tttattactg tctgactctc ataaccctca acagtcagta tgtgttcaca  
17281 cagtgaaaaa cagtcgtaca ataacctccc tcaactcaac tgagcagaaa ctgaactgat  
17341 acagttcaat aaagacacac cacgcgcaca cacacacaca tacattctct gttgaaatta  
17401 tgttgatcaa aatggcaaac aaaaggttag tgggtgttta taatttattg ataaagctca  
17461 atgggacagt ttagtgtggg gaggagagga atgatccatg attgagactg agganntnn  
17521 nnnnaagggy gaaaggcccc cgggccccca aaaacctggg ggtccccccc cccccccaga  
17581 attactgttt agatcactct ttgatttcaa atacagtaaa attaacaaca aaaagctac  
17641 atttttgtat ataaaacaga aatccggaaa aaaataataa acattttttg aacgtgtttc  
17701 ctctcaaatc accagaaact tgattcagtt gttaccccg cggatttcat ggttgtgtag  
17761 ctgttagaac tatttctca cagctttaaag gtgatcacia ttcaacagct ttgtgaccac  
17821 aaaacggaat aatggtttca aaaaaagttg gattgtcatc aaaatctgtg gtcaacagct  
17881 gttttttttc agtttttaat tttacaactt aaattcgtct atgtatgttt tttctatgga  
17941 caagtgtgtc caagcttttag gttttcattg ctagtgtatt tattgatagg actgaaaaat  
18001 gactgtcagt gtagaaactc tgaactcctc atgagattaa aaacgtgctt cttctttgct  
18061 gttttactac atttgtttat cttttgttgt gttactaatg cttgaatttt ttattttttt  
18121 tattgtactt tagtcatcac aaaatatttc atgtgagtat aaataagaac tttcttctgt

18181 catagtatga catggaacca aatctgttga aaaagttttt ttatttgtac aaataaatga  
18241 aactgtaaaa gtctaaagtc agagtttaag aaagagaata aaagaagaac tgcatagaaa  
18301 acagatztat agtcagaatg ttctctgttc ggactgggag cactgggtct tccatgaaagt  
18361 ctctaagact ggatccttgg atcctctctt ggctctgacag gtcaccttct cccactggtc  
18421 tgcagagagc ctcagggtgc tgctccagct gtagaggcgc tccttctgca gcacccgggg  
18481 gctcctgctc tcctcccagc tgctgctgct gctgccgacc acctcccagg acagagtcca  
18541 gtctgagggg aagcccttgt tggccacaca catgagtgtg gccttcccct gctgcagctc  
18601 cttcatggag ggggacagca ctgtcagcaa gggcggcaca tgaccactg cagggaaaca  
18661 gagaaaacat tttagagctg agatgaaact gctgagtgtt tcacttcct ctctaagctc  
18721 agtaaccatg gtaacagaca ggcactctg atgaaccaca gaaacagaag tttcctaact  
18781 aacgtaaaaa ctatttaaaa aaaatagctt ttttcagttg tgacactgt cttatgtttc  
18841 aactcttctt agatgaacat ttttatagat cttgcttttt tgtattaag catctttttc  
18901 ctaagtctgc actgacaact gcaaagaaat ctaaaacaaa attgttttgt tttagtttta  
18961 agcattcttt tatcagttat tttacaaatt catgctctga tgaccaaatt taatgaatat  
19021 taaataaaca ttaaaatgaa actataatct gtccaaactg atctctatca ttcatcaaag  
19081 tgcagctttg ttcattttca atcattgtca ctaaaagctc attagaagat tctgacagaa  
19141 actgacaaca aggctcagcg ttgtcatgaa attattgaac agaaacataa aaaatgtttt  
19201 aagtgttcac atgttaagac ataaattatc tatcagagaa aaagaagaaa gatgaggaag  
19261 ttacagataa ttgactattt ttctccggtt cttctgacat ttttacacaa ataaattctt  
19321 aatttacaga tgttatgagt gaaccagaaa cttaaaataa aaaataaaaa cacttttgag  
19381 atttgagatt ttgctgtctc acaaaaaagt gtcattgaaa aaaacgattt tttttttta  
19441 aatacaaaaa acatcaacct tagattataa gaatttcttt cataacattt atcagcttga  
19501 aagtttttat tattattgtt aaattaaact aaaggtactt acagtcaact accagtctgg  
19561 ttctctcacc aaaagtccac cacagtgata caaactgat gaagcgtctg acaaaaacct  
19621 ctgactgtac agagacacac tctctgactc tgaaacaaac aaactcaact gaaatgatgg  
19681 ctggagattt aaaaataaca tgttttattt ttagcagtag ttcaattttg tttataaat  
19741 gagttataat taagattaaa aaaacaacat ttgatcttgg ttcagattta gaaactgtga  
19801 caataatcaa ccaaagtatt atatcagcac caccacctaa tatctacaaa atctatttca  
19861 aaattaaaaa taaataaaaa tatttgcttt aatttaagaa aattccaaca tttacagagt  
19921 aacagtctgg caaaaataca atgtaacagt agtttttctt agattttcag aaatatctt  
19981 aaatcgtctt aaagaaaaga aactcgtgtg ttacaatgat taagaaaaa aattttgagt  
20041 taattctgcc tttgtacatt tacattcaaa tctttaaaaa aaatgatatt tttttgtgat  
20101 tttcattgtc ctgatgctct ctgaaaaccg tcatctttct ctccacagtt taagggataa  
20161 aattgaaatc tttgcacatc aggttttatg tttcatttta agaaaaat ta aaacactaag  
20221 ttttggttat tactcattta gacatgcggc tgggtgagc aggtagagcg gtcaaccact  
20281 gatctgaagt ttggttcaag cctttgtgac gcctatgtga cgaaaagaaa tgaaccctc  
20341 attgcttgg tgtgtgagt aaagtgtgtg annnnnnnnnn nnnnnnnnnn  
20401 nnnnnnnnnn nnnnnnnnnn nnnnnnnnnn nnnnnnnnnn nnnnnnnnnn nnnnnnnnnn  
20461 nnnnnnnnnn nnnnnnnnnn nnnnnnnnnn nnnnnnnnnn nnnnnnnnnn nnnnnnnnnn  
20521 nnnnnnnnnn nnnnnnnnnn nnnnnnnnnn nnnnnnnnnn nnnnnnnnnn nnnnnnnnnn  
20581 nnnnnnnnnn nnnnnnnnnn nnnnnnnnnn nnnnnnnnnn nnnnnnnnnn nnnnnnnnnn  
20641 nnnnnnnnnn nnnnnnnnnn nnnnnnnnnn nnnnnnnnnn nnnnnnnnnn nnnnnnnnnn  
20701 nnnnnnnnnn nnnnnnnnnn nnnnnnnnnn nnnnnnnnnn nnnnnnnnnn nnnnnnnnnn  
20761 nnnnnnnnnn nnnnnnnnnn nnnnnnnnnn nnnnnnnnnn nnnnnnnnnn nnnnnnnnnn  
20821 nnnnnnnnnn nnnnnnnnnn nnnnnnnnnn nnnnnnnnnn nnnnnnnnnn nnnnnnnnnn  
20881 nnnnnnnnnn nnnnnnnnnn nnnnnnnnnn nnnnnnnnnn nnnnnnnnnn nnnnnnnnnn  
20941 nnnnnnnnnn nnnnnnnnnn nnnnnnnnnn nnnnnnnnnn nnnnnnnnnn nnnnnnnnnn  
21001 nnnnnnnnnn nnnnnnnnnn nnnnnnnnnn nnnnnnnnnn nnnnnnnnnn nnnnnnnnnn  
21061 nnnnnnnnnn nnnnnnnnnn nnnnnnnnnn nnnnnnnnnn nnnnnnnnnn nnnnnnnnnn  
21121 nnnnnnnnnn nnnnnnnnnn nnnnnnnnnn nnnnnnnnnn nnnnnnnnnn nnnnnnnnnn  
21181 nnnnnnnnnn nnnnnnnnnn nnnnnnnnnn nnnnnnnnnn nnnnnnnnnn nnnnnnnnnn  
21241 nnnnnnnnnn nnnnnnnnnn nnnnnnnnnn nnnnnnnnnn nnnnnnnnnn nnnnnnnnnn  
21301 nnnnnnnnnn nnnnnnnnnn nnnnnnnnnn nnnnnnnnnn nnnnnnnnnn nnnnnnnnnn  
21361 nnnnnnnnnn nnnnnnnnnn nnnnnnnnnn nnnnnnnnnn nnnnnnnnnn nnnnnnnnnn  
21421 nnnnnnnnnn nnnnnnnnnn nnnnnnnnnn nnnnnnnnnn nnnnnnnnnn nnnnnnnnnn  
21481 nnnnnnnnnn nnnnnnnnnn nnnnnnnnnn nnnnnnnnnn nnnnnnnnnn nnnnnnnnnn  
21541 nnnnnnnnnn nnnnnnnnnn nnnnnnnnnn nnnnnnnnnn nnnnnnnnnn nnnnnnnnnn  
21601 nnnnnnnnnn nnnnnnnnnn nnnnnnnnnn nnnnnnnnnn nnnnnnnnnn nnnnnnnnnn  
21661 nnnnnnnnnn nnnnnnnnnn nnnnnnnnnn nnnnnnnnnn nnnnnnnnnn nnnnnnnnnn  
21721 nnnnnnnnnn nnnnnnnnnn nnnnnnnnnn nnnnnnnnnn nnnnnnnnnn nnnnnnnnnn  
21781 nnnnnnnnnn nnnnnnnnnn nnnnnnnnnn nnnnnnnnnn nnnnnnnnnn nnnnnnnnnn  
21841 nnnnnnnnnn nnnnnnnnnn nnnnnnnnnn nnnnnnnnnn nnnnnnnnnn nnnnnnnnnn  
21901 nnnnnnnnnn nnnnnnnnnn nnnnnnnnnn nnnnnnnnnn nnnnnnnnnn nnnnnnnnnn  
21961 nnnnnnnnnn nnnnnnnnnn nnnnnnnnnn nnnnnnnnnn nnnnnnnnnn nnnnnnnnnn  
22021 nnnnnnnnnn nnnnnnnnnn nnnnnnnnnn nnnnnnnnnn nnnnnnnnnn nnnnnnnnnn  
22081 nnnnnnnnnn nnnnnnnnnn nnnnnnnnnn nnnnnnnnnn nnnnnnnnnn nnnngagaaa  
22141 taccagggac tcagagaaga actggagaaa gcatggaaag tgaaggtgac agtgggtgct  
22201 gtggtaattg gagcactcgg ggcagtaacc cccaagctgg aggagtggct acacagatac

22261 ctggaaagac ctcagacctc tcagtcacaga aaagcgcagt gctaggaaca gctaagatac  
22321 tgcgcaggac cctcaagctc ccaggcctct ggtagaggac ccgagcttgg aggagaaacc  
22381 actcgcggag ggtgagaggg gcgtgttata tatctactag atgatathtt gttttaaacc  
22441 tacaactttc aatttattga taatcatgat gatgaggatg atccatggtc ctggttggag  
22501 cagtgaagaa atttaacaaa tccatgcaaa acaatatttt gttaaaagta ttactttcag  
22561 tgaatcgaga ttcgatgatg tccatattcc tggttggagtc agtggttagca tttccataga  
22621 gacactttgc atcagcagct ccatgctcca gtgctttggg agactttata gtcctgagag  
22681 ttgaagactg gatgactgac agctgtcctt catcacagca gaagacacag aaatcctcct  
22741 cctcatcctc atcatccaaa acatgactgt gatccttcgtc ctcatctgga ctctcctctg  
22801 ctgctgcttc acaggtaaag tccagagaat ccaactcctc tcctctatga acatccgtcc  
22861 ctctgaaatg aagccacaaa aagcatgaaag ttgctttctg tttctgtctc tgtatccctc  
22921 gagtcagag gacaggtcac agtgactcag cctggagcag tgagctctgc tgtgggagga  
22981 tctgtctcca tctcatgtag aaccagccag aatgttaatg gcaactatht atcctggtac  
23041 caacagaaag atggagaaac tcctaaacta ctaataatcc gtgctagcac tcgagaatca  
23101 ggaactccaa gtcgttttac aggcagtgga tcaaaactcag atttcactct gaccataaat  
23161 ggaattcagg ctgaagatgc agcagtttat tactgtatgg gtgaattcta catcaacagc  
23221 aaatactcgt tcacacagtg aaaaacagtc gtacaaaaac atttttcaat cagagagaa  
23281 agaaactgaa cggatacagt tcaatgaaag cacacacaca cactcacaca catacctcca  
23341 ccccccccc aaaaaaaaaa aaaaaaaaaa gggcttcctc ttttttaggg aaactaatht  
23401 nnnnnnnnnn nnnnnnnnnn nnnnnnnnnn nnnnnnnnnn nnnnnnnnnn nnnnnnnnnn  
23461 nnnnnnnnnn nnnnnnnnnn nnnnnnnnnn nnnnnnnnnn nnnnnnnnnn nnnnnnnnnn  
23521 nnnnnnnnnn nnnnnnnnnn nnnnnnnnnn nnnnnnnnnn nnnnnnnnnn nnnnnnnnnn  
23581 nnnnnnnnnn nnnnnnnnnn nnnnnnnnnn nnnnnnnnnn nnnnnnnnnn nnnnnnnnnn  
23641 nnnnnnnnnn nnnnnnnnnn nnnnnnnnnn nnnnnnnnnn nnnnnnnnnn nnnnnnnnnn  
23701 nnnnnnnnnn nnnnnnnnnn nnnnnnnnnn nnnnnnnnnn nnnnnnnnnn nnnnnnnnnn  
23761 nnnnnnnnnn nnnnnnnnnn nnnnnnnnnn nnnnnnnnnn nnnnnnnnnn nnnnnnnnnn  
23821 nnnnnnnnnn nnnnnnnnnn nnnnnnnnnn nnnnnnnnnn nnnnnnnnnn nnnnnnnnnn  
23881 nnnnnnnnnn nnnnnnnnnn nnnnnnnnnn nnnnnnnnnn nntggggggg gggggggggg  
23941 gaagctttgg ttgcattgtg atctttgttc tggcttgggtc aggcgcgggg gttggcctgc  
24001 accgtccttg gcccccattt cagtgtccgg ggccatattg tctaaatggc tgcaccagg  
24061 tacagcggat cgcgcctgtc ctgtggcctt agggccctga cgcaggggc actcctggtc  
24121 ggggggtctac agccccctct ctctggtctc gaccggttgg actagggagg atctggttcc  
24181 cccaaataaa cacgtggtac atttttacag tttgcatgca tctgcacccc atttgctcct  
24241 gcacactggc tcaactgctc tgtatccctc ggtcctcacc cacaatgtat tgatgaacgc  
24301 aacaggtatc ttctcttcat cttagtattt cactcttggg tgtaaathtt gtctttcttt  
24361 ccagcagatc tagcataaat gttatgaagc ttaaaatcat aacctactca attttagcaac  
24421 ttggcaactg tatcccctca ctctctccc tttctctctc tttgcttctc cccctctttt  
24481 cacacttttc tttctctctc ctctcctctg tgaaaaaaga aaatacatat ttaaacgta  
24541 aaathtatta agtaaacaaa aaataataaa aaaacaaaaa ggggtttata gaaataaaca  
24601 tcctatccaa agctatccga acatacataa ccacttatht ttttaccact ttttaggaagc  
24661 gataaaaaat ggcaaacatg tttatgagag tttctgtgca taaaattggt ctaatgaaac  
24721 agatcaaaca tgataagaag aaatgtaaaa aaaatctttt tttaatgatc agtcagtaaa  
24781 aagcacatta attcacataa aaacacagat taacggtagc cgaaatattt acatgaatht  
24841 aatataagtc cttctatttt taattttgac attttatttc ttatggtgtt tcaaagtaaa  
24901 catttaatht aacaaatttg ccattccacc ttaaaaaaag ttatathttc ttaggccagg  
24961 ggtcggcaac ccaaatggtt gaaagagcca aattagatga aaaaaacaaa tatgtctgga  
25021 gccgcaaat attagaacct ctathtaagc ctataatga aggcaacaca tgcaatatgt  
25081 atctatatta gctatattag cctattatca aaatgaataa gttgctacaa acacataatg  
25141 agcattatta acgattaaat gtttatttgc cctgcagtgat attctgggag aacgacgcgt  
25201 cacgtgatgc ccctggtgtg caagtthaac tgcattacaa tatcaatgaa ttatgthtca  
25261 ttgctttgat aaaattaaag aaatgtaata aagaaatccg atttttgatg tcatthttat  
25321 tttgaggatt cgaacaaaaa ccaataaaat ggaacatgca tgactgggaa ctaaacagag  
25381 tgcaataaaa cccagcctgc ttttatacaa aaagaaaacg gcagccthta gaaaaagtaa  
25441 aacataataa atcaaathta taaagthaag ttttatttct gtgcaaatgg caagcaagtc  
25501 agtgcaaggg taaaacgcag cagcatcctc ttcttgtttt cgctgtacat ctctggcaaa  
25561 gacagtcagc ttgcgctcga atgacaaca gcttcaagca tttgcggcgc ctgcagactt  
25621 tcattcagct cgtttaggtg gctgttcagt catatccacc aaaaagtgca gctthttcag  
25681 ccaactcagta tcttccagtt gcgggtagtt caggtctttg cthttcaggg atgtthttcac  
25741 gtgttattat tccaaacgac acagcaagta taattctatt tthttccgga ctaattcact  
25801 tgttctgggg ctcccctttg tctgattgaa tctcatggat atggttactt tttgcttatt  
25861 ttaatctact cctctgagaa atctgggcat gtgttaaat acaattgttg aaacctatta  
25921 tathttataa agctthtaata gagagggttg gtgcagthtt gtgtgtctcc tthttgthtt  
25981 gthttgthtt tthttgthtt tthttcagct cthttattta attaaaaaa agatthttgca  
26041 aaagthcctt tathttcaaca ggtatthttg atthtgatgaa cattctgtac aacgtctgaa  
26101 taaattatat atatatggat taaaaaaat tcaactthca atctatcgat aatcatgaag  
26161 atgaggacga tccatgthtt gagtcagtg tgcatttcc atagagacac tttgcatcag  
26221 cagctccatg ctccagtgct ctgggagact ttatagtcct gagagttgaa gactggatga  
26281 ctgacagctg tccttcatca cagcagaaga cacagaaatc ctctcctca tcatcctcat

26341 caaaaacatg actgtgatct gcgtcctcat ctggactctc ctctgctgct gcttcacagg  
26401 taaagtccag agaatccaac tcctctcctc tatgaacatc cgtcacctcg aaatgaaggg  
26461 cacaaaagca tgaagctgct ttctgtttct gtctctgtat cctcagagtc cagaggacag  
26521 gtcacagtga ctcagcctg ctcagctgagc agcagtgatg gaggatctgt ctccactca  
26581 tgtagaacca acaatgatgt tcagtatggg agcagctatc accttttata ctggtatcaa  
26641 caaaaagatg gagaaactcc taaactacta atttactatg ctagcactcg agaactcaggg  
26701 actccaactc gttttacagg cagtggatca aactctgatt tcactctgag catcagtgga  
26761 attcaggctg aagatgcagc agttttattac tgtatgggtc aattccacat caacagcaaa  
26821 tactcgttct cacagtgaaa aacagtcgta caaaaacctc cttcagtcag agagaacaga  
26881 aactgaactg acacagttca ttgacaacac acacagacat acagttacat acacacacat  
26941 acttctctta ttttaaggtta acctaatttt ctttttcaa ttcacacaa agtctggttt  
27001 tatgggtgtt attgacaccc ttggtttttag atttgttctg tgataattac tgtaaataag  
27061 gtctgggtta gactgacatc acctcagaga caccaaccaa ctttgaggac atgaacccca  
27121 cagctgtcaa tcaaaaagtt cacattgggg gccacctcat cggggcccga tggggctcac  
27181 cctccctatt gcagagtagg gaggacatcg gtggcggata cgggaggaga gcttgaggac  
27241 ggtgttaggt gaggggtggt agagtataag acaagttaaa aaacaaaata caaattgtta  
27301 tgactggttt taggtaaaaa aatgtttctc agaattctaa ttactttttt tattcattta  
27361 tttattttat tttgtctatt taaagtttca ctgaagtcta tgtttaaaaa gttgttttg  
27421 cagaaacttt gttgttttta aatatttgat caaaaaataa tgctttgaca aatcagatgaa  
27481 tcaaaactac aaatgtattg attcctaaat ttagaaatgt tatttttttt tacatttaag  
27541 gtaagaattg atcattttta ggttcacaca aactaatgct tgtaattttt ttttttttt  
27601 acaaaactaa aataaactta tgttttatta taataatagt aaagaaaaga tggaaaataag  
27661 acataaaaca taaaagcatg aagaagaaa aacataaagc tctacataca accaacttcc  
27721 agtctggttc atcccacaaa agtccaccac agtgatacaa acttattgaa gcgctgata  
27781 aaaacctctg actgtacaga gacacactct ctgatcatga ccgaaaatat gagaaatc  
27841 atcctagtct cagaatttat gtgaattttt tagttgattc tgtattaaac tgtaaataac  
27901 tgttaatgct agtgcttctt cccaaactgt tgcaataatg catcaaatta taatcatatt  
27961 catttattca tggacagaa cttttctaaa agtctggaaa tccatttaac cgacatcttt  
28021 tgtgctgtga ttttatactt ttcttctctc aaccaataaa ctagaaaacc agcttctaac  
28081 agtctctagt taacgaactg taactgatt actactataa aacaggagt ttaaaaatggg  
28141 gttgaattgc ggtgtagtgg acagcactct cacgcaagaa catgaagtcc ctggtcaaa  
28201 tccttaagtc ctttcttttt ggagttggca tgttctccta cacgtgtttt tgttttctg  
28261 gcactttggt tcctcccaca gtccaaaaac acgcttcatt ggggtcatta ggtgtgaatg  
28321 tgtgtgctg tctgtgcat ttgagtgga ctgaaaactg tcaaattatt tcagtcagac  
28381 aactcttgca gtaagaaata tttatttgac ataacttaatt tcccacattc ttttaagtgg  
28441 cattcacatc ttttgtttgg cataaggctc cgttcaattc catgagagat ttccataaaa  
28501 ctttcgggtc acaaaacccc cttttacgga gcccacaggt ggaaccggg gagggaggtg  
28561 gggcgaagaa tgagcgtgta aggttaagaaa gaatgaacaa ctgtgcacct gggcttaaat  
28621 aggacgctga gcaggtgagt taattgactg aaccgcccta gggtagggta ttacctgtaa  
28681 aacactgcag cgagtatctg cccgaaatac gataaatcgt catttcatcc aacaatttct  
28741 aagtagaatg agattttagt agacatttaa ccagaaatg atttttaaaa tattacatct  
28801 tcctccagaa tcttgaaact ttagcagttt tgaatgtagc tgcagggagt atatgattgt  
28861 aaaaatgaaa agtcattatt gttatttata tctttttttt gctgtgggtt tcatgtgaa  
28921 ttttgccttt cagactttta ggaagcagta aaaatttggc aaacatgtt atggaggttt  
28981 ttgtgcataa actggaggaa acagcttgac atgttaaaaa cagcagattc tgactaattc  
29041 agaattgttg tattacagta tagtccattt tttgtaataa gcatcagata aaaatttttt  
29101 aataaaacag atcaaacata ataagaaaaa ctgtaaaaac aatttttatt taatgatcag  
29161 tcagtaaaaa gcacattaat tcacataaaa ctcagatgaa cagtacgcaa tacatacata  
29221 aattccttaa aagtcctttt atttttaatt ttaacacttt gtttcttttt ttacaaaatt  
29281 gccattccac cttaaaaaaa ttatgttttc tatattttct tcttttttcc cgacacatta  
29341 aagtgaacac agatgcactt tattgtataa acttgaaaat tgtacttttt actgttaaaa  
29401 aacattattt tatttttcaa tattgatatt tattggattc catgttctctg ctgggtcag  
29461 tggtagcatt tccatagaga cactttgcat cagcagctcc atgctccagt gctctgggag  
29521 actttatagt cctgagagt gaagactgga tgactgacag ctgtccttca tcacagcaga  
29581 agacacacaa atcctcctca tccaaaacat gactgtgatc tgcgtcctca tctggactct  
29641 cctctgctgc tgcttcacag gtaaagtcca gagaatcaa ctctctcct ctatgaacat  
29701 ccgtccctct gaaatgaagg ccacaaaagc atgaagctgc ttttctgtt ctgtctctgt  
29761 atcctcagag tccagaggac agtacacagc gactcagcct ggagcagtg gctctgctgt  
29821 gggaggatct gtctccatct catgtagaac cagtcacagg gtggatgatg gtactgacct  
29881 atcctggtat caacagaaag atggaaaatc tcctaaacta ctaatttact atgctagcac  
29941 tcgagcatca gggactccaa gtcgttttac aggcagtgga tcaaaactctg atttcactct  
30001 aaccatcagt ggaattcagg ctgaagatgc agcagtttat tactgtttgg gtgaattta  
30061 catcaacagc aaattctcgt tcacacagtg aaaaacagtc gtacaaaaac ctctctcagt  
30121 cagagagaac agaaactgaa ctgacacagt tcaatgaaga cacagagaag nnnnnnnnnn  
30181 gaccaccttc caggacagag tccaactgaa ggggaagccc ttgttgccca cacacatgag  
30241 tgtggccttc cctgctgca gctcctctgt ggagggggac agcactgtca gcaagggcga  
30301 ggcacacact aggagacacc aatcagctta gaggacagga accacacagc tgtcaatcaa  
30361 aaagctctca ttggatgcag tggtttcagt ttgaagaagg tttgtgttca ggtgtttttc



30421 tgctccatca gtcattgatt cacacattgt ttcacttctt tgaagaaatc tctcatgcag  
30481 atcagcaaca agacaaactt cagtttctac tgaaaaatg tcaaaactggg ttagaaaaag  
30541 agcagatgca tctttatgta tagaacaagt ttggactgaa tgcctttaaa aagcttctac  
30601 atactctaaa gaaatgtaca tactatggtt aaaacacaa aatcatgtca gttttctgtg  
30661 tcatgtagaa attcctcaag taatataaaa atagatattt tgaaggaaaa cattaaaaatc  
30721 ttttttgaaa gacaaacgtc tttttacaaa actgaattaa tgctcactat gtccacataa  
30781 tacttaattt atcttttaac acaacacagt gtttataaag agacatgaac aatagtagaa  
30841 tgttgtttaa aaaataaact gtttctttac cttcacgtaa atttgaatta gatccaaata  
30901 aatattcaga taatatttaa aaatgtataa acttccagtc tggtttctcc attaaagtct  
30961 accacagtg taaaaactga ctgtaactc atacaaaaac ctctgacttt acagacgccc  
31021 tctctgactg ttaactctaaa ctaaatgttc caaaaaattt ttttacaatg taagacata  
31081 tttattttat aattaaggga gggaaactttt attatagggt tccacacagaa taggtctgct  
31141 ttaacagaca aaaaagaaaa attaaaaagg gaaaaaaata cataatactt acagataatt  
31201 taaaatctgc aacagaacaa aaaatacaaa aagcaacaaa aaattttact tacttccaac  
31261 atccagctgc gttcctccac caaaagtcca ccacagtgat acaaaactgat tgaagcgtcg  
31321 taaaaaaacc tctgactgta cagagacacg ctctctgact ctgaaacaaa caaactcaac  
31381 tgaatgatg gcagtgaagc taaaaataaa acatctacgt tttagaatt aaaaatgatc  
31441 tttagatgta agcaataaat taactaatta atggtttaatt tggtttcttt cagcagta  
31501 taattttaata atcgctcagt taaaactaaa tgagagcaca accaacaataa cgttaaaaaa  
31561 agtttaaatg tcttttaaaa tataagaatg catgcaaaaa taagttaaac agtttttaaa  
31621 tgtggctgca ggtcatatgg atctacaact ttactaaagt ccatgttaa aacggtgccc  
31681 taaaaaaca ttttttcagt aatagcagta caatttctact ccaaaaatca ttccatcat  
31741 gcattgataa aaaatccact ctttgatcag cagaagttct gtcttaataa caataaacag  
31801 ctgtgctgct agtttaagta aaacttctt tggaaataaa cctactttta agaatttata  
31861 ataaaatggt tcaaaatgct taaaaaaaag tcaatggtgt ggtttttgtt gtcctgctgc  
31921 tttctgtcag ctgtcatggt tcatctacac atacagataa ttgaaacaaa tagctgttat  
31981 gtatttctct tgatcaatat gtttcacctt gagtagtaat ttttaaagtc actcagattc  
32041 taacttatac gtttggagac cacaagaata atggaaacaa aatgaaaaaa acttcagaaa  
32101 ttgaaaacaa atgcaattgt aaaaacactt agatgtctc aaatcacatt caacaacttt  
32161 atggtcacga tatttaaaag gaaaaaaaag ctcaaagtcg ctccatgatc atctgaaacc  
32221 aagtaatact gtaggggatt tatttttcca taacttatta ctttcaattt tctgataatc  
32281 ttgatgatga ggatgatccg tgttctgtt ggagtcagtg gtagcatttc catagagaca  
32341 ctttgcacat gcagctccat gctccagtc tctgggagac tttatagtcc tgagagttga  
32401 agactggatg actgacagct gtccatcatc acaacagaag acacagaat cctcctcatc  
32461 atcatcatcc tcatccaaaa catgactgtg atctgctcc tcatctggac tctcctctgt  
32521 tgctgcttca caggtaaaat ccagagaatc caactcctc cctctatgaa catccgtccc  
32581 ttaacagaaa aggccacaaa agcattaagc tgctttctgt ttctgtctt gtatcctcag  
32641 agtccagagg acaggtcaca gtgactcagc ctggaccagt gagctctgct gtgggaggat  
32701 ctgtctccat ctcatgtaca accagtcaga atattcatag caactattta gcctggtacc  
32761 aacagaaaga tggagaaact ctaaaactgc tcaattatta tataagcagc agagcatcag  
32821 ggactgcaac tctgttttaca ggcagtggt caaactctgg aacagatttc actctgacca  
32881 tcagtggaat tcaggctgaa gatgcagcag tttattactg tcagagctt cacatcatca  
32941 acagtcagta tgtgttcaca cagtgaaaa cagtcgtaca aaaacctccc tcattttggc  
33001 taacagaaa ctgaactgac tgctgcagct ggaagatgt gcaaacactg aacactgtca  
33061 ctgaacatcc attctaacaa tcaaaaacac agacaatagt caccttatgt taccagatat  
33121 aagaacttgc tctgtttta atggaaactt ctttaattaa tatattaata atcaatatat  
33181 attttatctt ttgtaaaaaa aaacacacaa aaaaaacgaa ttattcttct taagaagtac  
33241 aatcaaaaag tattatataa tttaagctgt taggaagaca gagccaacag atgtgttata  
33301 atatttcaga gtgttcatga gtctgtggac aggctcaacc cttaagactc actgactcac  
33361 tacaagcaga aatataaagc tttgatgaat tctactggtg atttaaactc atctttaacc  
33421 ccttcacacc tgatttttt ctaaatatata aaacaaatata tttctttaa gttttttaca  
33481 ttcaagggtga tgtttatgat ttttgttatt attttatctg ttacagtcaa tagtactttt  
33541 agaaaaacaa atcagataat aaagtctaac accttcaaaa gtaatattta aatcttaacc  
33601 aagacaaaag tacttttgtt catgtactct ggatggatgg cttttagtca gagaagtttt  
33661 ataagcggcc attcagactt ggtttatctt aagttgtaga catttcaggg caacatgttt  
33721 acaacttaaa aaaataagtt cagaagcctt tttctaaaaa actttgtgca aagccaaaag  
33781 ttattaaatt atttaaatga agccgctgtg ctgagatctt gggcaaatata ttccaccaca  
33841 ctgggatcag attgtagagt gtagaatat tgattctgat tgtttgcat gttttacagg  
33901 aaccaccagc tgggtgctgct ttgcagagtg ttgtttgtgt gttggattat agacctggac  
33961 ttggtcctgg tgtaaaaatc cacttttaaa catcctggca tacaacaaa tttccatgct  
34021 gttaacagca tggaaatgat acaaaattta gcttaaagat actgtaactc cacaccaggc  
34081 actcacagac accaatggct cttaaccctt gtgctatcct aggcacttta acattgggag  
34141 tggggctcat tagaccact agacagtgcg ctgaacctt tttcttcaa gattttgtat  
34201 cttcactggt gtcctaggat tacatgaaat cctctttacc tttatccacc tttgtcagtg  
34261 tagggagaac acgtcaatgg tcacctgac cccataggat agcccagggt taaagggttt  
34321 atttggtttc tcaaatgacc gttaaagata cttcacagtg tattatagta attacatttc  
34381 caaagcgaa tgactatatg cagatggaag ttcaaataca tttttctatg tccgcatgt  
34441 ttaaggccag attcaaacct ggactggttc cagagtctat ccaggagctg tccgagggtc

34501 tgaccatcag catggaacat gactgatttc caggagcttt ccatgcattc cttcactatt  
34561 taactctata tgtgctgctt taagtaaagt caactgtagt gttttgctga ttttttgtat  
34621 aaattcagaaa tacttctggg aatgctttgg atcgctattg tttgcttaag gaatcatcct  
34681 cttttctgg atcacctgaa aagacaaatc atctaaaatg agtgacttta agtagtgga  
34741 actgatttga agagagaacc atattttcta catgtggtta tttttgcaaa gtaatgactg  
34801 actgatagtt gtttatact caatataagt ctatggaatt tgagtttttt ggagccagcg  
34861 ggtacttctt gtttgagagg tgaggggaaa ggggtcactc agtccagttc tcatatacag  
34921 tctatggctc tacatgtcca aactaaagat attaccacac tctcaactcc aaaagcagaa  
34981 gattacattc taacatttta atgtgtacaa ttcttaagaa aatcaacatt acattacatt  
35041 cattgactgt atgagagaaa tctttgtcct tacatcccta atatttagtt taaagaacca  
35101 ttgacgtata tcactctacc agctcagtggt cttgtggtta aagtgtccac ccgagcagta  
35161 caaacctgac atcacttctt tttgtcgcca acattgtgaa aggtaagtta ttttaacttag  
35221 tttagcttcc tgtagcattt ccagacagtt ttgtgtcctt tttgactgtc cgatctattt  
35281 aaacaacaga ttctccata ttgacacaaa tgtatgattt cctcaacaac agagagcttc  
35341 ccctgactgg attacagcgc cataaaactg ggagaatggc gcccaaatgc aacactgtat  
35401 attctcatal tgttgtcatt gcagtcaatg aaaatctcag tgatgcatga tatcatgaaa  
35461 accacaaagc ttggagtcac ttttctctct gtttgattgt tattattttt ttcaggacac  
35521 tggcaatggg aaaagatgaa aactcaagat gtttttctct gcgggatgcc cccgagctac  
35581 tctagccact tttgcaacta aatgaactgt taataatgtg tctatattaa gtgagtaaat  
35641 tggttgtttc tgtttgcatc ctcatcctc agagggcgga aactgccagt aaataaaca  
35701 gaagaagaca tttacatgtg tgctacagat cagtcagacc agccatgcag ccgaatttgc  
35761 acatgtgcat gtctgtgtgg gccgactttg ccgatgcgta ataatgattg tgcagttctg  
35821 atacactacc aaaacctctg actgtcacaga aacacactct ctgaatatga tacaacaaa  
35881 aaatcctaaat tgaatgatg gcagaaaatc taaaaataac acatcttaat ctttaattta  
35941 aaagttttca ctgtaagtta taattaaact gtgcattatt ttatgtcatt gctaccttag  
36001 aaacagtatt aatccttgtg taattaaat taaatcacac taaatcaacc aaaatcccc  
36061 caaaaaatta gaaatgttgc ctcaaaaatt taaaaccaa aaaacaagaa ctgattagat  
36121 ctcttcacat cacattcaac ggttttaaaag tggtcataat tctaaaaggt tctaagctac  
36181 ttcattatca tctgatcaaa caaaaatata tttgttaaaag aaatggccaa aaaaatccct  
36241 gctaatattt taattaaata aatactttca ggtaatttta aaaaataatg acagtgaaga  
36301 tgatccatgt tctgttggga cactgtgta gcatttccat agagacactt tgcacagca  
36361 gctccatgct ccagtgctct gggagacttt atagtcctga gagttgaaga ctggatgact  
36421 gacagctgtc cttcatcaca gcacaagaca cagaaatcct cctcctcatt atcatcaaaa  
36481 acatgactgt gatctgctc ctcatctgga ctctcctctg ctgctgcttc acaggtaaag  
36541 tccagagaat ccaactcatc tctctatga acatccgtcc ctctgaaatg aaggccacaa  
36601 aagcatgaag ctgctttctg tttctgtctc tgtatcctca gagtccagag gacaggtcac  
36661 agtgactcag cctggaccag tgagctctgc tgtgggagga tctgtctcca tctcagctac  
36721 aaccagtcag aatattcata gcaactattt agcctggttc caacagaaag atggacaatc  
36781 tctaaactg ctcatttatt atataagcag cagagcatca gggactgcaa ctcgttttac  
36841 aggcagtgga tcatctagt gacaagattt cactctgacc atcagtgga ttcaggctga  
36901 agatgcagca gtttattact gtcagagtta tcaactacat aacagctctg ggggtgtcac  
36961 acagtgaaaa acagtcgtac aaaaacctcc ctcatctgg ctgaacagaa actgaactga  
37021 ctgctgcagc tggagatgc tgcagacat gaaacagttc actgaacatc cattctaaca  
37081 aacacaagag acacctcatg ttacaagatt tctgtatttt catttaatct cactgacaaa  
37141 tacaggcatt aatttttctt tttgtttttt taagaaataa aacaacatac tgctagataa  
37201 gtgcaatcca gagacacact tgtttttggt ttctgtaaaa atatgtgggt tattttgttt  
37261 ttactttatt atttatatat tttttgcaga agttgtactt tttgaggtcg ctttatgaca  
37321 aaagcaaagg aagatacaac cttcacctta aaaggcaaaa aacattaaag aataattttt  
37381 atataattgg aaagaagtca aatgggaagg aatagttttt tttctgtttc ctttctgtt  
37441 tatttgattt cttacaataa aaatccagt ttgtttctga cataaaagag agtcatggca  
37501 aggaatcatt tggcaaacgg tctttttatt tgcagataat tcttctaca tggactgcaa  
37561 caagtaaaat aagagtttag gaaaataatg taaaagaaga actgcataga aaacagattt  
37621 atagtcaata ttccagttca agactgggag cactgggtctc tctgaaagt ctctatgact  
37681 ggatccttgg atcctctctt ggctgacag gtcaccttct cccactggtc tgcagagagc  
37741 ctcaagggtg tgctccagct gtagaggccg tcttctgca gcacccggg gctcctgctc  
37801 tctcccagc tgctgctgcc gaccacctcc caggacagag tccagctctga ggggaagccc  
37861 ttgttggcca cacacatgag tgtggccttc cctgctgca gctcctctg ggggggggac  
37921 agcactgtca gcaagggcga ggcacacct aggagacacc aatcagctta gaggacagga  
37981 accacacagc tgtcaatcaa aaagctctca ttggatgcag tggtttcagt ttgaagaagg  
38041 tttctgttca ggtgtttttc tgctccatca gtcattgatt cacacattgt ttcacttctc  
38101 tgaagaaatc tctcttgca atcagcaaca agacaaactt aagtttctac tgaaaaatgt  
38161 caaactgggt tagaaaaaga gcagatgcat ctttatgaag aaaacaagtt tggactgaat  
38221 gtctttaaaa agcttcatca tacattaaag agatgtacaa attaggaaaa aaacgcaaca  
38281 atcatgaaag tttcactgtg toctagggaa atgtcttata gaaaaaaaat gagacaacgt  
38341 gaaataaaat aacccttaag aaaagtctg acaaacataa ctattttgtt acaaaactga  
38401 agtactgctc actgactaaa tattacaaaa ttaaccatta acacagcatg tcaactttta  
38461 gacaaacata aacattaaaa aaagttgaa agtggctaaa aattagctct ctttctctc  
38521 taaattcaac tttgatcaaa attttctgc aggtaatggt cagatgctag aatgtcaaat

38581 taataaacct acttccaaca tccagctctgg ttcctccacc aaaagtccac cacagtgata  
38641 caaacctgatt gaagcgtcgt acaaaaacct ctgactgtac agagacacgc tctctgactc  
38701 tgaacaacaac aaactcaact gaaaaaaatc gcagaaaaatc taaaaatatt tttaatcttt  
38761 ggttttaaga attagttttc tttattaat agttgtaaat aaacctaat tattttttgt  
38821 ttgcatTTTT gctttagaat tttttttatt aaccggccgc attgtaaat gacagcaaaa  
38881 cccctctatc cctaaaaaga tgttaaattg cctttttaaa attaaagaaa agcatttggg  
38941 ctatTTTTtg cctatatatt cataattaca gaagtctgtt ctaaactgct gtgtcacttt  
39001 gatttaatta aattaacttt agagttcagt ctgcttttgt gccattactt ttaaatcttt  
39061 aaaatatctt tatatatatg atttatTTTg tggatttccac tgcctctgtt tctctgcaa  
39121 actgtcatgt ttctctccac atgttaataa acaacattat tagttgttga agtttttttt  
39181 attttgaat aggtttcatg ctgcattcca tgttaattaa ataaatttaa ttttgcttca  
39241 cagtcattca gaaaaattta cgacaaatga aatacgcctg tgtatgtgtg tgtttgtgtg  
39301 tgtagaataa tgtgagtgtg caggaatcct tatgacatgt ggagaactgc agcttctgac  
39361 tgattcagtg tgtttgcata tgtgtgctgc ctctctgctt ccagcagta aagctcagtg  
39421 ttgatcagtg gccgtccaga cctttcagag acactgactc gcccgagca caatgatgat  
39481 gtcactgact ctgctgctct tcaccctgga gctcctcgtt cagggtgaga ctgtctctg  
39541 gaagctttgc ttcaagcagc aaccaggttc tccacaatga tgttctgctg tgatggagaa  
39601 aactgaaac tagcagcact gagtttctc ttttccattt tctttgagct gttttgtct  
39661 caataattct tctcttttta ttgttttcag ctctatcnnn nnnnnnggt accggtgctt  
39721 agtgtcccgc ggcccgtgct caagtgtccc gcggatggat cagtaccggt gcctagtgtc  
39781 ccgcgcccg gtgccaagt tcccgcgat ggatcggat cggtgccaag tgtcccaggt  
39841 cccggtggct tgggaccact gttgtaaaat aaagacgttt cgccctgtgg actaacgtag  
39901 gtgtaaacgt ttgtttttca caatttagag cccctaaaaa aacgttttca cacagcgaag  
39961 aaagataact aaaaactgca tttttataaa agccttctga aagtaaatgt tatatttctc  
40021 actagaaatg ttgtcagaat aaagattagt ccttaaaaaa tcctgttttg tgggattttc  
40081 taccgaaaaa tgaacgagca tccgccatgt tttttttcac ggcaggcaaa acctcagaag  
40141 tcacgtgatc ctgagaaggc taatagaaaa tgaataggaa aatgaaactg aagtgtctca  
40201 caagttacgg gccgtttttg tgaacctgtc acgtatttcc atgtggacaa atgtagctac  
40261 tacacatttt aggatgagac tgggttgttc atggtggaag atttcttttt tatcatctgc  
40321 ttttgccggt tctgtcttt tcttcacatg ttaagtttgt tatttcttt agcttcaaac  
40381 actcaaaccc caaattttac agttattttg tctctaaaact catctctttt ttggattcag  
40441 gttggtgaac tgcactttgt caaagttcag ctgtgcagct ctggtctcag ctctaaagtc  
40501 cagcccgtcc catctaacag aactggattt gagcttgaac ttcattcagg attcaggagt  
40561 ggaacatctg tgtgcctttc tggagacttc atgctgcctt ctgcagactc tgaggttaca  
40621 gagcttctgt gtttctgtaa gctcaggaac aacttgcatt catcaagctg tgaatgctgt  
40681 ttagcttttt ttctaaatat ggtctgttgt tgccaaagag taatatttga ttcagaaggt  
40741 gaataaatga tttactgata gtttttacag ctcccacaca aaacctgtt gcagaagaac  
40801 ctctgtactc agacagtttc tacatgaaaa gatatgtatg gtttgacctt tgaccaca  
40861 cacattcagc tggactgat gtgtgctgac atgaacaagg tgaatgaatg tgcagataat  
40921 tggaggttct ctttagaagc tagcctgatg ctgtaaagga tccacatgaa ggactatgtc  
40981 cctgactca ctgagctgaa gaatggagca cctgaaaaa gctgctgatg tcatgtctgt  
41041 tccggtttca ggttggagcg ctgcaggttg tcaagtcatca gctgtgctgc tctggtgtcg  
41101 gctctgaagt ccaaccatc ccatctgaca gaactggacc tgagtgggaa caagctccag  
41161 ttgctgatg ttcagcagct tcatgatctg gtgaagaatc caaacttcaa cctggagact  
41221 ctgaggtcag cagaggttga aagtcagctc aacatctccc tacagagtgt tagtaaacctt  
41281 gaagttagtg aaatgagggc aaagatttag aattttctgt gaagcagcag atttcagtca  
41341 caatgtgaga gaagaaatga tgacaagttt aaggacagac atttagaaac cagcatcagt  
41401 ccttttcttt caacagaaga acatcagagc tgacagggaaa ctgctgctct gagcagaact  
41461 gaagtcccag attctcaatc tgggacttca ttgcatcaca ttctaaccac atagaaaaaca  
41521 ttgcatctct ccacatcatn nnnnnnnnt aaacgttttt gatgttattt gttcattaag  
41581 ttttttgaa gtttaatttt cagtacagat gatgaaaaaa gattaaagcc tttggttaat  
41641 ttttaaaaac gtctcagtaa tgaagaagat aaccgatgct aaaagttagt aatttgataa  
41701 caaacatggt ttttttccgt tttacaaatc ttttaagttat gtaaataaac tgaggcctga  
41761 acaaaaaaga ttcataatca aactggagac atttgtattt atttgaagac aacacaaaac  
41821 ttgaaaagag caaaggacaa aagtaagaat agatttaaaa gaattttaa gtgagagtta  
41881 gtcagcaaga gagtcagaaa tatccagttc aggactggga gcactggctc ctccgaaag  
41941 tctctaagac tggatccttg gatcctctct tggcctgaca ggtcaccttc tcccaggtt  
42001 ctgcagagag cctcaggggt ctgctccagc tgtagaggcc gtccttctgc agcaccggtg  
42061 ggctcctgct ctctcccag ctgctgctgc tgcctccgac cacctcccag gacagagtcc  
42121 agtctgaggg gaagaccttg ttggccacct tctgattcac attttagaac agaatttctc  
42181 tgagaaatat taagaaagat gaggaagtta cagatgtttg aaactatgaa tacattctgt  
42241 ctgtttcttt gacattttta tacaataaaa ttcataattt acagatgtca tgactgaatc  
42301 acagtttaat gtttgataac agcataaaa ttaaagttat agtaaaacat caataataac  
42361 cctttaaact tgcatttaca gatacatttt tgaagagcgt cctttttttt ttagaactaa  
42421 attaacattt aaaacaattt gtcttacttt aatgaaatac attgagttta gaatattatt  
42481 aaaacatggt ttaataatga tcagaccaa agttatagtg ttaataatga atcaaaagta  
42541 cttacagtca atcaccagtc tggttcctcc accaaaagt caccacagtg atacaaaactg  
42601 attgaagcgt cgtacaaaaa cctctgactg tacagagaca cgctctctga ctctgaaaca

42661 aacaaactca actgaaatgt cagcaaaaaa tatctgaaaa tgacacatct taattttaga  
42721 attttaaata gatattgtaa gtgtgtttgt ttttcagaaa actgtaaata atgtttgatt  
42781 gttttctttc ttcaaaaacg gtttaaataa ccaacttaat aataaatgcc agaactacta  
42841 tctgtgacct gtgaacattg acaataataa agttttagtt ttctaagtaa tttttacaac  
42901 gtcctctttt taatttttgc atcgcaaaaga cttttttaca gtgaacacag ataaactgac  
42961 atgacttgac tttaacctt atgctattta acattgggag tcatctagac ccactagaca  
43021 gtgaactgaa cccaatttct tcaatgattt gtgatcttca ctggtttcca tggattccat  
43081 gtaaacctct tcacctttat ccacccttgt catggtcgga atactgtaag ggtaggatca  
43141 taggatagca caagggatga tactgattca tgttacaaaa gatgttgact ttttaacta  
43201 agattcacia taaaatgatg taaaacaaga ttatcaaaaa tttaacagaa atttgattat  
43261 tgcaaatggt gagtttaatt cagacttaag aaaacattaa agtcacactt ttttaaacg  
43321 tagttttttt ctcatctata atctgaaatg aaaagtgtat acattttcat tttatgtata  
43381 aatattttata agaactctgag ttcccgttgt agtcagaaga aatataatta tttaaaaatg  
43441 tgatgctcaa gaaacagagg ctcaagaaac tgtagtaaaa gttttatttt tacataaatt  
43501 tggagacaga aattacatca ataattatta aaaaatata tattcaatta ttgataatca  
43561 tgactatgag gatgatccat gttcctgttg gagtcagtgg tagcatttcc atagagacac  
43621 tttgcatcag cagctccatg ctccagtgt ctgggagact ttatagtcct gagagtga  
43681 ctgacatgga ctgacatgga tccttcata cagcagaaga cacacaaatc ctccctcatca  
43741 tcatcatcat ccaaaacatg actgtgatct gcgtcctcat ctggactctc ctctgctgct  
43801 gcttcacagg taaagtccag agaatccaac tcctctctc tatgaacatc cgtccctctg  
43861 aatgaaggc cacaaaagca tgaagctgct ttctgtttct gtctctgtat cctcagagtc  
43921 cagaggacag tacacagtga ctcagcctgg agcagtgagc tctgctgtgg gaggatctgt  
43981 ctccactca tgtagaacta gtcagaatgt ggatggagtt gtcttttct ggtaccaaca  
44041 gaaagatgga gaaactccta aactgctcat ttatggata agcagcagca aatcaggaac  
44101 tccaactcgt tttacaggca gtggaacatc tagtggacaa gatttcactc tgacctcagg  
44161 ctgaagatgc agcagtttat tactgtttgg ctgaattcta catcaacagc aaatactcgt  
44221 tcacacagtg aaaaacagtc gtacaaaaac ctcttcaat cagagagaac agaaactgaa  
44281 ctgatacagt tcaatgaaga cacacaaata cacaagcaca cgcacatgct ctgttgatata  
44341 tgtattgatc aaaaatagcaa aatgtactgt tggctacaaa tttattgaga aagctcaatg  
44401 gtccagcta aagttgggag cagaggactg agactgagga caagaatatg gctgagagca  
44461 ggaaggcaga cattcatgca ttaggaaacca ggaaaagatt aacaaaaatc tggcagtag  
44521 ttgtagattg agggtttata cttttggaac tgtgatgagg aaactggcta caggtgagag  
44581 gtgggactat agacgagtca gaaactccat gcagatcatg caaaggaaca aatacatagg  
44641 gaaagaactc aaacacatac acacgcacac acacacacac aaaacatgty tgaatttttc  
44701 ttcttttttt cagaattact gttcagatca ctcttttatt tcaaatacat atcatcaaca  
44761 taaaaactac atttttgtat attgtgacag ggtcccgcg agaaaggatg cagagagacc  
44821 gaggagtag ggttcggtct ttatttcaag aacaaagtct cacaaatgct ccacgcaggg  
44881 ccacacagcg cattgcacct cagtctcact cctccccatt tcacttctg tgatgatccc  
44941 ttttgaagag cgagcccctc ccattgggag tggctcttaa ttattgtgca ggtggacca  
45001 caggtagtga ttttaaacad aaaatacatg aatacataaa aaataaaaaca cagtgtggcc  
45061 ccccttgta tctgacgggg ccacaccgtc acatcatccc cctcctctga gggatcgagc  
45121 atgtgcggcg atccaaaaac agcagcccgc cgcagcgcaa gcgccacgcc gaaccaccag  
45181 acagttctgc aggcgcccct cgtccaactg agaggccctg cagtccaac gccagacatc  
45241 agcgggaccg tcctctgact cgtgctctc caccacgtc ctgcctcgg atggatgat  
45301 gggctgcggc tgctccatga cggcgacccc tccgatccgc tctcgggtgc ccgcaccggt  
45361 cgttcccagc cccggcaaaa ggcccttcca ttggccacac gcccccgctg gtctactccc  
45421 ggatggcacc ttagccgatc ggagccgctg acagcaagt ccaggcgaga tgttgcgct  
45481 ctcccggagc actctgctga cggctcggta gacgtcggtc cgcacctgt ccatctccgc  
45541 gcaggtctac aacgcctgca tcggcgggag tggaaaccggg cagtgtgccc gtcccgcctc  
45601 cggccatctc cgtgctccgg cggctctgcc ttgctgccc tgaggtccgc cgtcgtcat  
45661 gggcgccgag ttggacgccc taggtctct tccgggcccc tggccaggcc acccctctt  
45721 ccttagagga tggctatctc gatggaggcg ctgagctgcc gtgggatctt cttcccgc  
45781 tctgcccct cacccttttg tggcccctct gcgatccac ttctgacacc aaatgtgacg  
45841 gggctccgctc aggaataat gcagaggagc caaggtgag agggctcgtc tttattcaga  
45901 accagttgac accacagttt ctcaacgag ggccacacag cgcattggcact ctccgtcact  
45961 cctcctcact acctgtgatg cacccttta aatgatgag ccctccatt ggggtgtggct  
46021 cttcatcatc ttccagtggt caccacaggt agatatttta tacatgaaat ataacaaat  
46081 gcacaaaata aaaacagtgt gggccccctc gccatctgac ggtgccacac cgtcacaata  
46141 taaaacagaa aaaaggaaaa aaagaaataa acattttttg aacagtttaa taatctcaa  
46201 taatcagaaa ctagattcag ttgttatcct aggggcttct atggttgtgc agctgttaga  
46261 actcttgctc cacagctttg aggtcctggt tcaaatctaa actgaaacct tttctgggat  
46321 ctgtgttcat gctttcttta ggccctctgg caacatgtag tccaagaagc ataatttata  
46381 gggctcaagt atgatttata ggtttgagtg tgactatttg tttttgttt tttcggtttt  
46441 tttttacaa tctaaaatta tctatgtacg tttgtttcat ggacaattgt gtccaagctt  
46501 taggattttta tctgctagt ttttaaaaa atgactttca gtgtagaaac tctgaactcc  
46561 tataaaaaac ctgcttcatc tttgatgggt tttacattag gttatctttc ttttttact  
46621 actacctcaa tgcttatttc atttattcat tttttatgt attttagtca tcacaaaata  
46681 tttcatgtca gtataaagaa gaactttctt ttgtcatagc gagacatgga aagaaatctg

46741 ttgaaaaaaa gtttttttat ttgtacaaat atttttcaat taaaactgtc acaagaaaaga  
46801 aatgcaaaaca gagtttgaga aagataataa aacaagaact gcatagaaaa cagattcata  
46861 gtcatagttc cagttcagga ctgggagcac tgggtctctcc tgaaagtctc taagactgga  
46921 tccttggatc ctctcttggc ctgacaggtc accttctccc actgggtctc agagagctc  
46981 aggggtctgc tccagctgta gagggcgtcc ttctgcagca ccccggggtc cctgctctcc  
47041 tcccagctgc nnnnnnnnnn cgccgtaggt ctctttccgg gccctggcc aggccacccc  
47101 ctcttctcta gaggatggtc atctcgatgg aggcgctgag ctgccgtggg atcttcttcc  
47161 ccgcctctgc gccctcacct ttttgtggcc cctctgcgat ccacttctg acaccaaatg  
47221 tgacggggtc ccgtcaggaa ataatgcaga ggagccaagg tgaggagggt cgttctttat  
47281 tcagaaccag ttgacaccac agtttctcaa cgcaggcca cacagcgcat ggcacctccg  
47341 tcaactctcc tcactacctg tgatgcacc ttttaaatga tgagccctc cctttgggtg  
47401 tggctcttca tcatcttcca ggtggacca caggtagata tttatacat gaaatataaa  
47461 caaatgcaca aaataaaaac agtgtgggcc ccctcgccat ctgacgggtc cacaccgtca  
47521 caatataaaa cagaaaaaag gaaaaaaaaga aataaacatt ttttgaacat tttaatcgtc  
47581 tccaataatc agaaactaga ttcagttgtt atcctagggg ctttcatggt tgtgcagctg  
47641 ttagaactct tgccctcacag ctttgaggtc ctggttcaaa tctaaactga aacctttctg  
47701 ggtatctgtg ttcattgctt ctttaggcc tctggcaaca tgtagtcaa gaagcataat  
47761 ttatagggtc aagtgatgat ttataggttt gagtgtgact atttgtttt gtttttctg  
47821 gtttttattt tacaacttaa aattatctat gtacgtttgt tnnnnnnnn nntggccaca  
47881 cacatgagtg tggccttccc ctgctgcagc tccttctgag agggggacag cactgtcagc  
47941 aagggcgagg catcacctag gagacaccaa tcagcttaga ggacaggaa cacacagctg  
48001 tcaatcaaaa agctctcatt ggatgcagtg gtttcagttt gaagaagggt tctgttcagg  
48061 tgtttttctg ctccatcagt cattgattca cacattgttt cacttctctg aagaaatctc  
48121 tcatgctgat cagcaacaag acaaaactca gtttcgactg aaaaatgca aactgggtta  
48181 gaataatagc agatgcatct ttatgaagaa aacaagtttg gacggaatgt ctttaaaaag  
48241 cttcatcata cattaagaa atgtacaaat taggacaaaa acacaacaat catgaaagt  
48301 ttctgtgtcc tagggaaatg tcttatagaa aaaaaatgag ataactgtaa ataaaaaac  
48361 ccttaagaaa agttctgaca aacttttttg tcacaaaact gaagtactgc tcaactgcta  
48421 aatattacac aattacccat taacacagca tgtcactttt aagacaaaac taacatttaa  
48481 aaaaatgata atagtggctc aaaatgagtc aactttctct cttaaattca actttgatca  
48541 aatttttaa ttttaatgtc aagaagctat aacgtcaaat tttataaact tacttcaaac  
48601 atccagctctg gttcctccac caaaagtcca ccacagtgat acaaaactgat tgaagcgtcg  
48661 tacaaaaacc tctgactgta cagagacagc ctctctgact cattctcaac tatttcttaa  
48721 tttcttgatt ccaaaacgta gacaagatat tttattttat gattaaggta aactcattta  
48781 tttaaatttt tggatcaca cagattaagt ttgtatgtaa aaatgaaat tgggtgtttt  
48841 gaaaaaacac ataaaaacag atttttaaata tctcttagag ttgacaggag atcaagaag  
48901 gtataggac aaaaaaaa ctaaaagtta caaagactt tacttactc caaactccag  
48961 tctggttctc ccacaaaacy tgagccacag tgatacaaac tgattgaagc gtcgtacaaa  
49021 aacctctgac tgtacagaga cacgctctct gactctgaaa caaacaact caacggaaaa  
49081 aatggcaaaa aatctaaaaa taatacacct ttgggtttta gaattagttt tctttgttaa  
49141 atagttgtaa ataaacgtta attatttttt gtctgcattt ttgcttaaaa aattttttta  
49201 ttaaccggcc gcattgtaac atgacagcaa aaccacctca tccctaaaaa gatgttaaat  
49261 tatcttttta aaattaaaga aaagcatttg gactaatttt tgccccatatt ccataattc  
49321 agagagttac agaaaatgtg tctaaactc tgtgtcactc tgatttaatg caaactccct  
49381 tagagttcag tctgattttg tgccatcatt tttaaatctt taaaatatct ttacataaat  
49441 gtttttattt gtgagtttca ctgtcctggt gttctctgca aactgtcatg tttctctcca  
49501 catgttaata aacgacatta ttagttgttg aagtttctt tatttttgaa taggtttcat  
49561 gctgcattcc atggaattta acaaaattta gttttgcttt acagtcattt ggaaacattt  
49621 acaacaaatg atatatggtt gtgtatgtgt gtgtttgtgt gtatagaata atgtgagtg  
49681 gcaggaaatc tcatgacatg tggagaactg cagcttctga ctgattcagt gtgtttgcat  
49741 atgtgtgctg cctctctgct tnnnnnnnn ngcagcacia tgatgatgc actgactctg  
49801 ctgctcttcc cctggagctc ctcgttcagg gtgagactgt cttctggaag ctttgettca  
49861 agcagcaacc aggttctcca caatgatgtt ctgctgtgat ggagaaacac tgaactagc  
49921 agcactgagt ttcttctttt ccaattttct ttgagctgtt tttgtctcaa taattctct  
49981 ctttttattg ttttcagctt catcaggaca actgctgact cagactgctg gagctcagtc  
50041 tgtagttcaa ggacagactg tctccatcaa atgtaaaacc agtcaaagcc cttacttctg  
50101 ctttaactgg tatcttcaga gacgggcaga agcccctaaa cttcttctt attgtacaag  
50161 caatcgtcag tctggagttt ctgatcgtt cagtggtatca aactctggat tagactacac  
50221 tctgaccatc agtggagttc aggctgaaga tactggagtt tattactgtc agactggctt  
50281 cagcatcaac agtcaatatg tgttcacaca gtgaaaaaca gtcgtacaaa aacctcctc  
50341 agaaactgag aaaaggaaac agttcattaa agacacacac acacacacac acatacacac  
50401 acatacacat gtaatttaag ctgtgtttct ttttttatta taaatatagg ttgggatgaa  
50461 tgattcattt aaatttaatg tgatgaattc actaaatgat cagttttatg tctaactca  
50521 ggtcagactg actgttttct ttttctgtc agggttgaga tcattaactg aaacatctcc  
50581 acatccatca atgactccac tgatttctgt ctgctctaat ttcactgttt tcatctcact  
50641 tctctgattg ttttatctgt aatttgatgt catcaaaaca aaaactttct ctttaacct  
50701 ttaaaactgt aatttgtag aaagctgctc tcttctttac tgttagtgya tcaaatatgg  
50761 accttttatc ttgaaataca tcacctgttt tcaattacaa aaacgacctt atttaattta

50821 ttatatttcc tattgtaata aaatgggtaa ttacaatatc tatatctgat aaagttttat  
50881 tagataaacc taaccaacac aaatatattt tttattctat ttttatagta attaataagta  
50941 ggcccaagtg tggggttaca ggtccaaacc ttgttatgtg ggtatcttga tgaccaacatt  
51001 gcaggaatga agagccaaga gtagtgggtt gaatgcttaa atttatccac aggttccaca  
51061 taacaagcct gttaggaata attagaaata gaatagttag aaactcctt tttactatta  
51121 ttacattttac ctataccttt tattacacta atggtttaac ctttaattcac tgagcatgta  
51181 ttatcatctc aaaattatat tgcacacctaa gacagcacia acaagctatt gtcctcacag  
51241 tttctcctca tctcctcttt ttactttttg tgtgttctgc tgtttgtgct ctggcaaatg  
51301 tctgtgggaa catcagagag atctgacact tgaagcttta taacctcaa gtatccagcc  
51361 tgcaacagca tgtgggtggg tttttcacac catagatcac cagaccatct tttgaatatg  
51421 taaatgtcag gtatatatac caagccttt tctgagtgc tttgttcaga cctggttcag  
51481 acctgtgat cctgttctct tgtctgtaac cctgctgaca aatctgtgct gttttgtgctg  
51541 gagtaaactc tcaactgaagc taagttttgt ctctgagtca tcattcattc atttctgtgt  
51601 gctggaaact aaaaagggaa cgaaccaacc taatatttt attaatagc tctttctag  
51661 aaaatccagt tctctcacia agccaaacca agaactgag ctgaaccaa cgaaaactac  
51721 actccaaaac agagtacaga aacaggtgag cttattagaa caaacaatg aattaaatg  
51781 ctgacagctg tacacataac aggaataacg gagagaggc gggccttcta ggagccaaag  
51841 ccaatttata cacaaaacga aaggaaactg acagattgta acaaaccaac ctatattgac  
51901 agaaattttt ctattttggc cgtctcaaga aggattatct gaagagaact gacttgatgt  
51961 tttggatata caacacagca catttagtag ttctggagtc actttttctt gacttgactt  
52021 gatattttgt ggaaataaca ccataaatgt tgacttgatg tccagcctt tctttcagc  
52081 atctctgaca tatgagtcct tctcatcaga agtctggtt tgttcaggtt catactgagc  
52141 ctcttctca gacacatctt cctcagcttc tgtttttct tagtcatcag gatcattagc  
52201 aaaatagtgt aaaaagtga taaaattgat gataaaatga ttataaaata acagatttcc  
52261 acttatgaga gtaaacaaat ttatgtttgt gatgtttaa tggggctcac agcaactcta  
52321 tttttatcca attaaaaaaa taagagatga aaggattcaa aaaatcaatg caacataaaa  
52381 ttttgtaaaa aagttgtact tgcagagaat ttgtattgac aattctccag atctctgtg  
52441 gagtcagtg tagcatttcc atagagacac tttgcatcag cagctccatg ctccagtgct  
52501 ctgggagact ttatagtcct gagagttgaa gactggatga ctgacagctg tcttctatca  
52561 cagcagaaga cacagaatc cctcctctcc tctcctctc cctcctcat ccaaacatga  
52621 ctgtgatctg cgtcctcatc tggactctcc tctgctgctg cttcacaggt aaagtccaga  
52681 gaatccaact cctcctctct atgaacatcc gtccctctga aatgaaggcc acaaaagcat  
52741 gaagctgctt tctgtttctg tctctgtatc ctgagagtc agaggacagg tcacagtgac  
52801 tcagcctgga gcagtgagct ctgctgtggg aggatctgtc tccatctcat gtacaaccag  
52861 tcaggatggt catggcaaca actatttagc ctggtacca cagaaagatg gagaatctcc  
52921 taaactacta atttactatg ctagcaatcg agcatcaggg actccaagt gttttacagg  
52981 cagtgatca aactctgat tcaactctgag catcagtgga attcaggctc aagatctgtc  
53041 agtttattac tgtcagagtt ttcatgtcat caacagtcct tggacgttca cacagtga  
53101 aacagtcgta caaaaacctc cctcattctg actgaacaga aactgaactg actgctgcag  
53161 ctggaagatg ctgcagacac tgaacagtt cactgaacat ccattctaac aaacacacia  
53221 acactataga caccatgt accagatttg ttccttatt tctgcatgag tcttatagaa  
53281 ccagtttaag caagataata ttgttaaact tgcattaat ttattgatca catataaatg  
53341 ttttcatatt ttgcaaaaa acccaaaaa gtttaattt attcaatctg cagcaciaaaa  
53401 agagcatta gattttttg ttttgaaag attagaaaat caaacacia actgtaaat  
53461 aagtgcaatt caaaagcaca cttctttttg ttttgtaag gtattattag acttctgata  
53521 caattcatat tttttgcaga acactgaata ataattttca aataattaga aaaaagtcta  
53581 gtgtcctatg tgttactatt tattttatta ttcacaataa aatagagtt tgcttctgtc  
53641 caaaaagtta gtcatggaag gaaatcagtt ggcaaaagct ctttttattt gcagatacat  
53701 tttcctacag aaactgtaag tcaaaaagag ttaagaaaa gaataaaaaca agaactgcac  
53761 agaaaaacag atttatagtc atagttccag ttcaggactg ggagcactgg tctctctga  
53821 aagtctctat gactggatcc ttggatcctc tcttggcctg acaggtcac tctctccact  
53881 ggtctgcaga gagcctcagg gtgctgctcc agctgtagag gccgtccttc tgcagcacc  
53941 cggggctcct gctctcctcc cagctgctgc tgetgctgcc gaccacctcc caggacagag  
54001 tccagctgga ggggaagccc ttgttgcca cacacatgag tgtggccttc ccctgctgca  
54061 gctcctctgt ggagggggac agcactgtca gcaagggcga ggcacacctc aggagacacc  
54121 aatcagctta gaggacagga accacacia tgtcaatcag aaagctctca ttggatgcag  
54181 tggtttcagt ttgaagaagg tttctgttca ggtgttttt ctgctccatc agtcattgat  
54241 taacacattg tttcacttcc ttgaagaaat ctctcatgca gatcagcaac aagacaaact  
54301 tcagtttcta ctgaaaaatg tcaaaactggg ttgaaaaag agcagatgca tctttatgta  
54361 gaaaacaagt ttggactgaa tgtctttaa aagcttctc atacattaaa gaaatgtaca  
54421 aattaggaca aaaacacac aattatgtca gttttttctg tcagaaaaatc cttgatataa  
54481 gaatttaaag ttctgaaata tcaggtctcc aaaaatccgt ccagaaagac aattttgtga  
54541 gttaaactg ctttttatta cactatgacc acattagata aaaaaacac acaaaaaaac  
54601 acacactgtt aatagcag tttttaaact aaaaaactat ttttaagttga tgtattctac  
54661 taaaagttag tttagttcaa atcaataaaa actgaaactc aacctaaata tttttcagg  
54721 taatatthaa acattttattc cagtctgggt cttccaccaa aagttttcca ctgtgataca  
54781 aacagactga tctgttttac aaatatctct gactgtacag agactttctc tccagctgtt  
54841 tcaaaaataaa taaactaaat atttcagatt tcttgattca tatagaaatg ttgatttatt

54901 taatattaag gcaactcaat tttatatattt caagttttac acagaataaa ttctattata  
54961 aaaatatata tttttacaaa aataatagaa tgtctttttt tgatgtataa tagtaagtca  
55021 ggatccaatta aagaagggaaa taagacacga atacagaaaa agcaacaaaa agatctactt  
55081 acttccaaac tccagctcgg ttccctccca aaacgtgtac cacagtgata caactcagatt  
55141 gaagcgtcgt acaaaaaacct ctgactgtac agagacacgc tctctgactc tgaacaaac  
55201 aaactcaact gaaatgatga cagtaaactc aaaaaacaata cgtttttattg tctcagtgta  
55261 aactgcatga ttaactacgt tataaaacta gtaaaagtat gaatgaatcc agtattaaat  
55321 actctgatga acagaaaaaca acttttacagt ttttttgctt tcttgcattt atattcatal  
55381 ctttatgttt actttcaatt atttgttttt gggggagttt cactgtcctg ctgttctctg  
55441 cttactgtca tgtttttctc cacgttatga taaatggagt aattagttat tttgtttgaa  
55501 ttatttttgc actctaggtt tcactgctgca tcttcaaagt aatttaattg cacttaattt  
55561 tggttacgtg ttgtacagat tcctagataa ataaaaataa aacgttttgtg tgtttgtgtg  
55621 tgtagaataa ttagattgta gactagagga atcctcatga catgtggaga gctgcagctt  
55681 ctgactgatt cagtggtgtt gcataatgtg gctgcctctc tgcttccagc agttaaagct  
55741 cagtgttgat cagtgccctg ccagaccttt cagagacact gactcgcccg cagcacaatg  
55801 atgatgtcac tgactctgct gctcttcacc ctggagctcc tcgttcaggg tgagactgtc  
55861 ttctggaagc tttgcttcaa gcagcaacca ggttctctac aatgatgtc tgctgtgatg  
55921 gagaaacct gaaactagca gcactgtgca gcttctctc caatttactg caaggtgtt  
55981 ttgtctcagt aattctctct ttttctgtt tcagcttctg cagaaaagct cctcactcag  
56041 actcctggag ctgactctgt agttcaagga cagactgtct ccatcagatg taaagccagt  
56101 tcaagtgttg gcacctgct taactggtac ctccagaaaa acgggagaat cccaaaactc  
56161 ttgatttatt cagctacaaa tcgtcagctt ggtgtttcaa gtcacttcag tggagtgga  
56221 tctggaactg actttactct gacactcagt ggaattgaac ctgaacatgc aggagtatt  
56281 tactgtcagc agtgaacag ccttccgttc acacagtga aaacagctg acaaaaacct  
56341 ccttcagtc aactaaactg aaactgaact gatacagctc actaacaaca cacacacacc  
56401 tggacatccc atagcttcat gtaaagtaca tttactagtg aagacaaaaa tttaaatctt  
56461 tccttacaaa ccaaggccaa atattttatg tctgagagta atatgtaaaa taagcacaat  
56521 atgacaaaat aacaattaga tagtttatgc acaattttcc tctgtatact aattattata  
56581 aaactgttca tctctatctg attttctgat gcaggattta aagctaatat agttcagaga  
56641 caacagagtc attctgttgc tgcaaactga aaagcacgga aaaagaaatc aaaccgtca  
56701 ttttaccact ttgttttat tttacttaat acagaaattt taattaaacc aaaaactcaa  
56761 aaaataaaat taattttaag aaaacacaaa atatcaattt gtcgtctgta aaacatgtcg  
56821 atacattaaa caattttgtg aactttgtgc ttttgagtaa agagatttta ctttctgttg  
56881 ggtttacatt tcaaacaaaa aattcagttt atttgactta gttgacaaag ttacagtggt  
56941 catccctcca tccaattcgc cagtcatttg cagggcttca atgattatgt aactgataat  
57001 caaaatatta aacattatcc agattcctgt tggagtcagt ggtagcattt ccatagagac  
57061 actttcctc agcagctcca tgctccagtg ctctgggaga ctttatagtc ctgagatgtg  
57121 aagactggat gactgacagc tgtccttcat cacagcagaa gacacagaaa tcctcctcct  
57181 cctcatccaa aacatgactg tgatctgcgt cctcatctgg actctcctct gctgctgctt  
57241 cacaggtaaa gtccagagaa tccaactcct ctctctatg aacatccgtc cctctgaaat  
57301 gaaggccaca aaagcatgaa gctgcttct gtttctgtct ctgtatcctc agagtcacaga  
57361 ggacaggtca cagtgactca gcctggagca gtgagctctg ctgtgggagg atctgtctcc  
57421 atctcatgta gaaccagtca ggatatttat agtgatcgtt tagcctggta tcaacagaaa  
57481 gatgggaaaa ctccctaaact gctcattctt tatattagca gcagagcatc agggactcca  
57541 actcgtttta caggcagtggt atcaaaactct ggaacagatt tcaactctgac catcagtgga  
57601 attcaggctg aagatgcagc agtttattac tgtcagagtt atcacagcgg tgggtgtgtc  
57661 acacagtgaa aaacagtcgt acaaaaaacct ccctcattct ggctgaacag aaactgaact  
57721 gactgctgca gctggaagat gctgcagaca ctgaaacagt tcaactgaaca ccaatttttg  
57781 ggccggcagtg gctcaggcag atgagcagtt gtccaatgat tgaagggtca gcagtttgat  
57841 ccctgctccc tccagtcaaa tgggtgatcc ttgggtatga tacttcaccc tccagtgatg  
57901 atgtgcatga atgtcccgtg gatggtcaaa gtgaccgtag cgcggaactg ccagccactt  
57961 ctcggtcagt ctgccctagg gcagttttgg ctacatcagt agtttaccat caccagatg  
58021 gaacaaggag tgaatgaata atggacacaa tgtaagtgtc ttagcatctg gaaatgtgtg  
58081 gataaatcca atccattat agtattatc taataaacac acaaacacaa cagacactta  
58141 atgaccagat ttgttctcaa tttttttcag tagtctttag gaaacagttt aagacaaaata  
58201 gtattgttan nnnnnnnna attttgtaa cttttgctt tgagtaaaga gattttactt  
58261 tctgttgggt ttacatttca acaaaaaaat tcagtttatt tgacttagtt gacaaagtta  
58321 cagtgttcat ccctccatcc aattcaccag tccattgtag ggcttcaatg attatgtaac  
58381 tgataatcaa aatattaaac attatccaga ttctgtgtgg agtctgtgtg agcatttcca  
58441 tagagacact ttgcatcagc agctccatgc tccagtgctc tgggagactt tatagtcctg  
58501 agagttgaag actggatgac tgacagctgt ccttcatcac agcagaagac acataaatcc  
58561 tctcctcct catccaaaac atgactgtga tctgctcct catctggact ctctctgct  
58621 gctgcctcac aggtaaagtc cagagaatcc aactcctctc ctctatgaa ctctctcct  
58681 ctgaaatgaa ggccacaaaa gcataagct gcttctgtt tctgtctctg tctcctcaga  
58741 gtccagagga caggtcacag tgactcagcc tggagcagtg agctctgctg tgggaggatc  
58801 tgtctccatc tcatgtagaa ccagtcagaa tttttatagt gatcgtttag cctgggatca  
58861 acagaaagat ggagaaactc ctaaactgct cattctttat attagcagca gagcatcagg  
58921 gactccaact cgtttttacag gcagtggtac aaactctgga acagatttca ctctgacct

58981 cagtggaatt caggctgaag atgcagcagt ttattactgt cagagtgcn nnnnnmntg  
59041 attgctgaga aatgtcctga cgtaactaa aaaggatccg ttcattctat gaaattgtt  
59101 aaaagaaatg tgtatagttt atgtgttact gtgtgttctt tcaagaacaa gtgggtccaa  
59161 gcttttgact gctactgtat ttattataac aggtcaaaat agaaattttg aacctctgag  
59221 tttagcaaac ctcgtccttc aaagcaaatg ttagatattt agttgctttt aacaaactct  
59281 ttaacatctt caggctgtat gtcattaatt agcaacatgc caatggacaa aacctaattt  
59341 agcatcacct taaaaggcaa aaaaatcgaa agattttttt tttaaattgg agcgaagtct  
59401 ccatatgatt cactgtgttt ttattcctca acaaatttat cacaataaaa ctatgagttt  
59461 gcttctgtac aaaaatagag tcattgaatg aaatcagttg gcaaaagctc tttttatttg  
59521 cagataattt ttctactgaa actgtaacaa gtcaaaaaaa gtttgataaa aagaataaaa  
59581 gaagaactgc atagaaaaca gaattatagt cataatttac agatgtcatg actgtaacac  
59641 agtttaatgt ttgataacag cagagactta aagtaaaagt aaaacttcaa taataacatt  
59701 ttaaattgca tttacagata cttttttgaa agatttctct ttttttagaa ctaaattaac  
59761 tattaaaaca atttatctta ctttaaagaa atacattgag tttagaatat tattaaaaa  
59821 tgtaaatgag accaaaagt gaagtgttta taatgaatca aaagtactta cagtcaatca  
59881 ccagtctggt tctccacca aacgtgtacc acagtgtacc aaactgattg aagcgtcgtg  
59941 caaaaactc tgactgtaca gagacagct ctctgactct gaaacaaaa aactcaactt  
60001 aatgatgac agaaaatcta aaaataatc agtttattgt tacaatgtaa attgtattt  
60061 acagtttatt actgtcagca gcataacagc ttcccgttca cacagtgaaa cacagtctga  
60121 caaaaaccta gaacgctaaa taggaactga tctacagccg cactgaagca gaggatttcc  
60181 agacaaacac accaaagaca ttaattttaa gttttggttt ttagatgtaa caattattt  
60241 actcattatt aactcagatg taaaacaatt tatgcaaaac agtcttcatt gaactcaaa  
60301 acactataag tattcatctc tgaatgtat tattgtatta ttttaaaacc agtagttcag  
60361 gttcaactgc atcaagctgt cagttttatg gtcagttaac ccacaaaaat actgtaaac  
60421 tgatcatttg acctcttttc tgtcaaaaac gtattgaaat gttcaaatcc tcacctact  
60481 tacctcccct caaaacattt cagccatatt tttaaatggt tccctgtgtc atgttgagtt  
60541 tattttgatt tgatgagtca caaagatttt ctttgacttc tgtttcatca aactatacaa  
60601 aaacaaacag ccgttcgtga acgtttcctt tatttactga atcttccgtc actgtgatct  
60661 ctgtgtgatc cctgacagt ttgctgtggtc cagactctga accaaagcct tgtgagttgt  
60721 gaggttttca taactaacag taaatgtctc taatcataaa tcgttcttat ttggaacca  
60781 cttccctgtt tttgggtaaa ccaactcoat gtccactaaa tgtatttgyt agccactct  
60841 tcatgatgat tcttcagggt tctgagtct tttttccatc aaaattgaaa tccattacag  
60901 ctcaaagctg tctcgaatga aaatcatttt tttcttctc tcacctaga catttagggc  
60961 ccttggtggg gagggtgatt ggacatcgtc gtgagtaatc aggagatgtc ctctcagtyc  
61021 cctaccggcc aattttaact gcaccccctt atagtcacaa caccctttac ccctctaaat  
61081 atacctcaa acacaaacac atacctgac acacacgccc tcacaaacac acacacatgc  
61141 atttcacaaa gcagggtgga cctcggagca tctgtcccct accccatccc tggtaggggg  
61201 taccaggccc ttggcaacg cggcctgtgt ccccggtgct ccgcttctc gacacggaag  
61261 ccttttctct gcgcaggag agggatccct gagttctctg gcaagaccaa gacatcacat  
61321 ctgagccgga ggggggagg gtctgtgcc gtgtggtgtg ggcctacca aatttccaaa  
61381 tgtgggagag cctagtcggg ccatgtcac aacacttctt gtggacgccc ctccctact  
61441 ggtgtcttcc tctggatgg ggattgctgg cccctctcc tggaccaacc atgggctgg  
61501 tgggtgctc ccttgggggg tctagctcgt tacctttggt tggggtgggg ggggtcccag  
61561 aactcctggg tgggtggtg gtgctggtc ggggctgtg gggctctct gagctctct  
61621 cccgtgccc ggagggtct cctggtggg ctgaaactgc actctctgtc cccctgac  
61681 accctgctct ctggctttgg gggccccct ggcagtctc gtggccctgg cctgggtggc  
61741 ggatgtgggg gtggttgtt tctatctgct actgtgctgg tgttgggggg ttctagctgc  
61801 tgctgcgga ggggtcttag tgtgggaatg gctatgact ctccctcct ctttttcat  
61861 tccattatac atttaagagg aacataaaca ctcacaagag cacagggtgt agctcacctt  
61921 tactataaaa gtttgtgtga ttgaatgaaa tatttcatac tagttggtt gaatgatag  
61981 gtgtgctgt gtgaacaata tctgtgtgt gtacatgtt acatgtggac acttttagc  
62041 caacaggtat gttcgtaca tttgagtgt tgtgtggaca agccccgccc ctatagacct  
62101 gtattacatc tgaacctaac cgtaacaagt acagccatcc ggaaactcgt tgccttatgc  
62161 tgcttcatgg ttttaccctt attcccctt aataatcacc tttctaccct acccctctct  
62221 aacatccctc tctcttttcc cctccttttc ttttccgtcc ggtccaacac aaaagatttt  
62281 caaatatgat taaaatgaat aaagattggc ctcgataaca aaaagggttt attcagacac  
62341 atctctgtt tttttccaga aaattcataa cctctattgt taaagtaaat tatgtccaac  
62401 acgagaggcc ttcagctctc atcagtttgc ccagctgtt gacaggaaaa gtaaaaaaaa  
62461 atcaaaatca ttattcatca gcaggatttt aaatagtagc ttcactaac tgaagtaaac  
62521 aaaaatttat tttacgttat ttagtttgtt gcgtttgaca cttctgtcta attcaaacat  
62581 ttttttatta attcctttta acttatcttc cacagattag tttatttctt caaactgtca  
62641 aaaatgtccc aaatgctaca ataagaaata attaaaaatg attcctaacta taaaatgat  
62701 ccatattcct gttggagtca gtggtcgtat ttccatagag acactttgca tcagcagctc  
62761 atctctccag tgctctggga gactttatag tctgagagt tgaagactgy atgactgaca  
62821 gctgtccttc atcacagcag aagacacaga aatcctctc atcatcatcc tcatccaaaa  
62881 catgactgtg atctgctgct tcatctggac tctcctctgc tgcctgttca caggtaaagt  
62941 ccagagaatc caactcctct cctctatgaa catccgtccc tctgaaatga aggccacaaa  
63001 agcatgaagc tgctttctgt ttctgtctct gtatcctcag agtccaggag acaggtcaca



63061 gtgactcagc ctggagcagt gagctctgct gtgggaggat ctgtctccat ctcatgtaga  
63121 accagtcaga atgttcatgg caacatccat ttagcctggt accaacagaa agatggagaa  
63181 actcctaaac tactgttcta ctatgttggc agcagagtat cagggactcc agctcgtttt  
63241 acagatggtg gatcaaacct tgatttcact ctgaccatca gtggaattca ggctgaagat  
63301 gcagcagttt attactgtca gagtcttccac tacatcaaca gtcagtggyt gttcacacag  
63361 tgaaaaacag tcgtacaaaa acctccctca ttctgactga acagaaactg aactgactgc  
63421 tgcagctgga agatgctgca gacactgaaa cacttctactg aacatccatt ctaacaaaca  
63481 cacaaacaca atgataactta atgtttaccag atttgttccct aattttcttc agtagtctta  
63541 taaaccagct ttaagcgaga taatattgtt aaatctgcca ttaatttatt gatcacatat  
63601 aaatgttttc atattttgaa aaaaaaaaaa aaaagggaaa attttttcaa tccccacccc  
63661 aaaaaaatan nnnnnnnnna gtgtaaattt attcaatcag cagcacaaaa agtaccatta  
63721 gatttttttg tttttgaaag attagaaaat caaacaacaa actgctaaat gagtgcaatt  
63781 caaaagcaca cttctttttg ttttggttaag ctattagatt ttcatttcat atttttgag  
63841 aacactaaag aataattttc attattatct attgtctcaa atacaatag agtttgcttc  
63901 tgtcacaaaa gagagtcatt gaaggaaatc agttggcaaa agctcttttt attttcagat  
63961 acattttccc acaaaaactg taacaagtca aaagagttta agaaaaagaa tggaaaagaa  
64021 gaactgcata gaaaacagat ttgtagtcatt agttccagtt caggactggg agcactggtc  
64081 tctcctgaaa gtctctaaga ctggatcctt ggatcctctc ttggcctgac aggtcacctt  
64141 ctcccactgg tctgcagaga gcctcagggt gctgctccag ctgtagaggc cgtccttctg  
64201 cagcaccctg gggctcctgc tctcctcca gctgctgctg ctgctgccga ccacctcca  
64261 ggacagagtc cagtctgagg ggaagccctt gttggccaca cacatgagtg tggccttccc  
64321 ctgctgcagc tccttcgtgg agggggacag cactgtcagc aagggcgagg catcacctag  
64381 gagacaccaa tcagcttaga ggacaggaac cacacagctg tcaatcaaaa agctctcatt  
64441 ggatgcagtg gtttcagttt gatgaaggtt tgtgttcagg tgtttttctg ctccactcag  
64501 cattgattca cnnnnnnnnn nnnnnnnnnn nnnnnnnnnn nnnnnnnnnn nnnnnnnnnn  
64561 nnnnnnnnnn nnnnnnnnnn nnnnnnnnnn nnnnnnnnnn nnnnnnnnnn nnnnnnnnnn  
64621 nnnnnnnnnn nnnnnnnnnn nnnnnnnnnn nnnnnnnntg actttacaga gactttcttt  
64681 cctgctggtt caatttaaac taaatatttc taatctcttg attcacatgg aaattatgat  
64741 ttattttata ttagaaaaaca caattttaat attttcaagt ttcacacaaa ctaagtctgc  
64801 ttataaaaaa aaaaataatt taccaaaaat aatcaaatgt catttttata cagtaattta  
64861 ctagtaactc agaatcaatg aaagaaagaa ataagacacg aatacagaaa aagcaacaaa  
64921 aagatctact tacttccaaa ctccagctcg gttcctccac caaacgtgta ccacagtgat  
64981 acaaaactgat tgaagcgtcg tacaacaaacc tctgactgta cagagacacg ctctctgact  
65041 ctgaaacaaa caaactcaac tgaaatgatg acagaaaatc taaaaataat tcattttatt  
65101 gtcgcagtgat aaattgtatt tagttgttga gttgtaatta aactgtgtat taatttttaa  
65161 cctttctaatt gaatcacaaa gttgtaataa taatcacatt aaagcacacg cagaaaaattt  
65221 gattgaaaga ttgaaagctg cctcaacaaa aactacaaaa aatataatcat tttgattaat  
65281 tgtgcaaaaa tgcacgatta actatgttat aaaactagta aaagtatgaa agaatccagt  
65341 attaaatact ttgattaaca gaaaacaacg ttatagttat ttttctttct tgcatttaga  
65401 ttcatactct tagattttct ttcaattatt tgttttttgg gagagtttca ctatcctgct  
65461 gttctctgca aactgtcatg ttttctcca cgttatgata aatggagtaa ttagttattt  
65521 tctttggatt atttttactc taggcttcat gctgcttctt caaataaaat taattgcaact  
65581 tcatttttgt tatgtcttgt acagattcct agataaataa caattaaatg tttgtgtgtt  
65641 tttttgtgta gaatagtgtg agtgtgacg aatcctgatg acatgtgagc acatgtgact  
65701 tctgactgat tcagtggtgt tgcatatgtg tgctgcctct ctgcttccag cagttaaagc  
65761 tcagtggtga tcagtgccg tccagacctt tcagagacac tgactcgccc gcagcacaat  
65821 gatgatgtca ctgactctgc tgctcttccac cctggagctc ctcgttcagg gtgagactgt  
65881 cttctggaag ctttgcctca agcagcaacc aggttctcca caatgatgtt ctgctgtgat  
65941 ggagaaacac tgaaactagc agcactgagc ttcttcttct tcaatttact tcaatgtgtt  
66001 tttgtctcaa taattcttct ttttctgtt ttccagctca tcagaagaaa tctcatcac  
66061 tcagactcct ggagctcagt ctggtgttga aggacagact gtgtccatca gatgtaaatc  
66121 cagcaaaact attggtgatg acattaactg gtatcttccag aaacctggag aagctcctaa  
66181 actcctgata gctgatacta cagaacgtca gtctgggtgt ccagatcgtt tcagtgcaac  
66241 tgcagttcag actgatttca ctctgaccat cagcagagtt cagcctgann nnnnnnnnac  
66301 aaaaatgaac tgaaactgat catttgacct ctttctgtc aaaaacgtat tgaaatgttc  
66361 aaatcctcac ctcaactacc tcccctcaa acatctcagc catattttata aatgtttcct  
66421 tgtgtcatgt tgagtttatt tttatttgat gagtcacaaa cattttcttt gacttctgtt  
66481 tcatcaaact ttacaaaaac aaacagccgt tcgtgaacgt ttcctttatt tactgaatct  
66541 tccgtcactg tgatctctgt gtgatcccct gacagtttgt gtgggtccaga ctctgaacca  
66601 aagcctttat gtgagttttt cataactaac agtaaatgtc tctaatacata aatcttccct  
66661 attttggaac cacttcacag tttttgggta aacctactcc atgtccacta aacgtatttg  
66721 tgagccacac tttcatgatg attcttccagg tgtcctgatt cttttttcta tcaatagtaa  
66781 aatccattac agctgaaagc tgtctcgaat gaaaatcatt tctttcttct tctcacctta  
66841 gacatttagg gcccttggtg aggagggtga ttggacatca ctgtgagtta tcaggagatg  
66901 tctctcagct gccctaccgg ccaattttaa ctgcaccccc ttatagtcca cacacctttt  
66961 accctcaaaa atatacactc caacacaaac acatacatgc acacacacgc cctcacaaac  
67021 acacacacat gcatttcaca aggaaggtgg acctnnnnnn nnnnnnnnnn nnnnnnnnnn  
67081 nnnnnnnnnn nnnnnnnnnn nnnnnnnnnn nnnnnnnnnn nnnnnnnnnn nnnnnnnnnn

67141 nnnnnnnnnn nnnnnnnnnn nnnnnnnnnn nnnnnnnnnn nnnnnnnnnn nnnnnnnnnn  
67201 nnnnnnnnnn nnnnnnnnnn nnnnnnnnnn nnnnnnnnnn nnnnnnnnnn nnnnnnnnnn  
67261 nnnnnnnnnn nnnnnnnnnn nnnnnnnnnn nnnnnnnnnn nnnnnnnnnn nnnnnnnnnn  
67321 nnnnnnnnnn nnnnnnnnnn nnnnnnnnnn nnnnnnnnnn nnnnnnnnnn nnnnnnnnnn  
67381 nnnnnnnnnn nnnnnnnnnn nnnnnnnnnn nnnnnnnnnn nnnnnnnnnn nnnnnnnnnn  
67441 nnnnnnnnnn nnnnnnnnnn nnnnnnnnnn nnnnnnnnnn nnnnnnnnnn nnnnnnnnnn  
67501 nnnnnnnnnn nnnnnnnnnn nnnnnnnnnn nnnnnnnnnn nnnnnnnnnn nnnnnnnnnn  
67561 nnnnnnnnnn nnnnnnnnnn nnnnnnnnnn nnnnnnnnnn nnnnnnnnnn nnnnnnnnnn  
67621 nnnnnnnnnn nnnnnnnnnn nnnnnnnnnn nnnnnnnnnn nnnnnnnnnn nnnnnnnnnn  
67681 nnnnnnnnnn nnnnnnnnnn nnnnnnnnnn nnnnnnnnnn nnnnnnnnnn nnnnnnnnnn  
67741 nnnnnnnnnn nnnnnnnnnn nnnnnnnnnn nnnnnnnnnn nnnnnnnnnn nnnnnnnnnn  
67801 nnnnnnnnnn nnnnnnnnnn nnnnnnnnnn nnnnnnnnnn nnnnnnnnnn nnnnnnnnnn  
67861 nnnnnnnnnn nnnnnnnnnn nnnnnnnnnn nnnnnnnnnn nnnnnnnnnn nnnnnnnnnn  
67921 nnnnnnnnnn nnnnnnnnnn nnnnnnnnnn nnnnnnnnnn nnnnnnnnnn nnnnnnnnnn  
67981 nnnnnnnnnn nnnnnnnnnn nnnnnnnnnn nnnnnnnnnn nnnnnnnnnn nnnnnnnnnn  
68041 nnnnnnnnnn nnnnnnnnnn nnnnnnnnnn nnnnnnnnnn nnnnnnnnnn nnnnnnnnnn  
68101 nnnnnnnnnn nnnnnnnnnn nnnnnnnnnn nnnnnnnnnn nnnnnnnnnn nnnnnnnnnn  
68161 nnnnnnnnnn nnnnnnnnnn nnnnnnnnnn nnnnnnnnnn nnnnnnnnnn nnnnnnnnnn  
68221 nnnnnnnnnn nnnnnnnnnn nnnnnnnnnn nnnnnnnnnn nnnnnnnnnn nnnnnnnnnn  
68281 nnnnnnnnnn nnnnnnnnnn nnnnnnnnnn nnnnnnnnnn nnnnnnnnnn nnnnnnnnnn  
68341 nnnnnnnnnn nnnnnnnnnn nnnnnnnnnn nnnnnnnnnn nnnnnnnnnn nnnnnnnnnn  
68401 nnnnnnnnnn nnnnnnnnnn nnnnnnnnnn nnnnnnnnnn nnnnnnnnnn nnnnnnnnnn  
68461 nnnnnnnnnn nnnnnnnnnn nnnnnnnnnn nnnnnnnnnn nnnnnnnnnn nnnnnnnnnn  
68521 nnnnnnnnnn nnnnnnnnnn nnnnnnnnnn nnnnnnnnnn nnnnnnnnnn nnnnnnnnnn  
68581 nnnnnnnnnn nnnnnnnnnn nnnnnnnnnn nnnnnnnnnn nnnnnnnnnn nnnnnnnnnn  
68641 nnnnnnnnnn nnnnnnnnnn nnnnnnnnnn nnnnnnnnnn nnnnnnnnnn nnnnnnnnnn  
68701 nnnnnnnnnn nnnnnnnnnn nnnnnnnnnn nnnnnnnnnn nnnnnnnnnn nnnnnnnnnn  
68761 nnnnnnnnnn nnnnnnnnnn nnnnnnnnnn nnnnnnnnnn nnnnnnnnnn nnnnnnnnnn  
68821 nnnnnnnnnn nnnnnnnnnn nnnnnnnnnn nnnnnnnnnn nnnnnnnnnn nnnnnnnnnn  
68881 nnnnnnnnnn nnnnnnnnnn nnnnnnnnnn nnnnnnnnnn nnnnnnnnnn nnnnnnnnnn  
68941 nnnnnnnnnn nnnnnnnnnn nnnnnnnnnn nnnnnnnnnn nnnnnnnnnn nnnnnnnnnn  
69001 nnnnnnnnnn nnnnnnnnnn nnnnnnnnnn nnnnnnnnnn nnnnnnnnnn nnnnnnnnnn  
69061 nnnnnnnnnn nnnnnnnnnn nnnnnnnnnn nnnnnnnnnn nnnnnnnnnn nnnnnnnnnn  
69121 nnnnnnnnnn nnnnnnnnnn nnnnnnnnnn nnnnnnnnnn nnnnnnnnnn nnnnnnnnnn  
69181 nnnnnnnnnn nnnnnnnnnn nnnnnnnnnn nnnnnnnnnn nnnnnnnnnn nnnnnnnnnn  
69241 nnnnnnnnnn nnnnnnnnnn nnnnnnnnnn nnnnnnnnnn nnnnnnnnnn nnnnnnnnnn  
69301 nnnnnnnnnn nnnnnnnnnn nnnnnnnnnn nnnnnnnnnn nnnnnnnnnn nnnnnnnnnn  
69361 nnnnnnnnnn nnnnnnnnnn nnnnnnnnnn nnnnnnnnnn nnnnnnnnnn nnnnnnnnnn  
69421 nnnnnnnnnn nnnnnnnnnn nnnnnnnnnn nnnnnnnnnn nnnnnnnnnn nnnnnnnnnn  
69481 nnnnnnnnnn nnnnnnnnnn nnnnnnnnnn nnnnnnnnnn nnnnnnnnnn nnnnnnnnnn  
69541 nnnnnnnnnn nnnnnnnnnn nnnnnnnnnn nnnnnnnnnn nnnnnnnnnn nnnnnnnnnn  
69601 nnnnnnnnnn nnnnnnnnnn nnnnnnnnnn nnnnnnnnnn nnnnnnnnnn nnnnnnnnnn  
69661 nnnnnnnnnn nnnnnnnnnn nnnnnnnnnn acaggatcag gtgatcaaca gtatcaaaag  
69721 ctgcgcttag atctagtaga actagtctgacc tgaatccaag gcacatctga  
69781 catcattaac gatttttaac aaggctgtct ctgtgctgtg gttcgtccta aagccagact  
69841 ggtttatctc aaaaatgttg ttttgagaga gaaactcatt cagctgaata aaaacaagtt  
69901 tttctaaaac ctacttaaa aatggcaagt tggacacagg tctgtagtta ttaaaaattg  
69961 aagggtctga attagttttc ttgagtaacg gtttcaccac tgccgtttta aaggcagcag  
70021 gaaaaatacc cgtctgtaga gaggagttca tgatatttaa aatctcactc tcaaaagacc  
70081 cgtaaaagga ttaaaaagt gatgagggat gggatctaaa aaacaagtgt ttggattaac  
70141 ttgggagaaa actcgaccaa gtggtgcagc ttcaaccagg tcaaaactgt ccagtgtctc  
70201 ctcaggtaac atcaagccaa cataaccaat agagaggctt ttctgttctt ttatgatgtt  
70261 agatctgaca gaatcgatct catggcaagg ggggcaaagt ggagaactgg gcctgggtcaa  
70321 attcccagta agtccctggtc cgctctgctt ccaagcagta ggccctccaga agccacatgt  
70381 cccgctctgc tgggtccagg taaatgtaag gctgggtccat tctgtcatgt agggagggcc  
70441 gtggtagcgt gaaggacca aaatgcagag gcggaggcac acggttcaag ggcaagagga  
70501 ttaaatcaca acaaaaagc gctgcagagc aggataacaa aactaaaact aaacttactg  
70561 tgagcaaaac atgaaacatg gtatgaaggg agtcagggac gagacgttag cgacgttaat  
70621 ggaccagcac aagaggaagg gagagacgag acttaaatac agacagggca gacaagacac  
70681 aggtgaacaa gatcaggaga gatggggaca aggaagtaaa actcaggaac atgacaaaac  
70741 agaaaacctt tcaaaaataa acaggaacaa gaaccaacaa tgacagaaca agaattaaag  
70801 caaaaaccaa gacaaaagaa aaccaaacca tgacattctg ggggtgaggtc ccgtgcgccg  
70861 gagggtctctc ctgtttgggc tgaagctgca ctctctgtcc ccccatgaca cctgtctctc  
70921 tggctttggg ggcctctggg acagtcctgg tggccctggc ctgggtggcg gatgtgtca  
70981 tccgggggggt ggttggtctc tatctgctac tgtgcgggtg ttgggggggt ctagctgctg  
71041 ctgcggcagg ggtcttagtg tggggatggc taggcactct ccctccttct ttttacattc  
71101 catcatacat ttaagaggaa cataaacact cacaagagca cagggtgttag ctcaccttgg  
71161 cactaaaagt ttgtgtgatt gaatgaaata tttcatacta gttggtttga atgcataggt

71221 gtgacctgtgt gaacaataac tgtgttgtgt acatgttgac atgtggacac ttttgagcca  
71281 acaggatgtt ttgtaacatt tcagtggtgt tgtggacaag ccccgcccct atagacctgt  
71341 attacatctg aacctaaccg taacaagat atccatccag aaattcgttg ttttatgctg  
71401 cttcatggtt ttacccccat tccctttcta taatcacctt tctaccccac cctctctag  
71461 catccccctc tctttttccc tccctttctt tcccgccgg tctaacacaa aagattttca  
71521 aatatgatta aaattaataa agattggcct caataacaaa aggggtttat tcagacacat  
71581 ctctgttttt tttttcttca gaaaattcat aacctctttt gttaatgtaa attatgtcca  
71641 acacgagagg ccttcagctc tcatcagttt gccagctgt tggacaggaa aagtaaagaa  
71701 aaaatcaaaa tcattattca tcggcagagt tttagatagt agcttcaact aactgaagta  
71761 aacaaatatt tttttacgt tttttagttt gttgcgtttg acacttcttc tgtctaattc  
71821 aaacattttt ttattaattc cttttaaact tatgttccac aaattagtgt atttctgaat  
71881 gtccaaatgc tacaatcaga aaaaattaaa aatgatccat gttcctgttg gagtcagtga  
71941 tagcattttc atagagacac tttgcatcag cagctccatg ctccagtgt ctgggagact  
72001 ttatagtcct gagagttgaa gactggatga ctgacagctg tccttcatca cagcagaaga  
72061 ctcacaaatc ctccctcatca tcatcctcat ccaaaacatg actgtgatct gcgtcctcat  
72121 ctggactctc ctctgctgct gcttcacagg taaagtccag agaatccaac tcctctctc  
72181 tatgaacatc cgtccctctg aaatgaaggc cacaaaagca tgaagctgtt tctgtttct  
72241 gtctctgtat cctcagatg cagaggacag gtcacagtga ctcagcctgg agcagctgagc  
72301 tctgctgtgg gaggatctgt ctccatctca tgtagaacca gtcaggatgt ttataacaac  
72361 aacttttttag cctggtacca acagaaagat ggagaaactc ctaaactact aatttactat  
72421 gctagcactc gagcatcagg gactccaact cgttttacag gcagtggatc aaactctgat  
72481 ttcactctga gcatcagtgg aattcaggct gaagacgcag cagtttatta ctgtcagagt  
72541 cctcacatca tcaacagtca gtatgtgttc acacagtga aaacagctgt acaaaaacct  
72601 cttcatttca ggctgaacag aaactgaact gactgctgca gctggaagat gctgacaca  
72661 ctgaaacagt tcaactgaaca tccattctaa caatcaaaaa cactgacaat agtcacctta  
72721 tgttaccaga tattagaacg tgctcctgtt ttttattcag tggaaaccagt ttaaaccaga  
72781 taagcccatt atttaaagat tatattaaaa acacatatat atttcacctt ttgtaaaaaa  
72841 caaaaaaaaa gattattccc atgaaaaagt acaatagaaa atgtgtgat cataatttca  
72901 tctgttagga agacagagcc aacaggagtg ttataacatt tgagtgatg gatgagtggt  
72961 cctgtggaca ggctcaacc ttttgactca ctgactcctt acaaagcaga ataatcttt  
73021 aatgaatcag tggttgtaat gaaaaatatt tattagtga cagaagcagt ctaatatgtg  
73081 tataagctat actgtgtgac aagcctaaca ttactgtaat ctcatgaaat aagtctttat  
73141 tacttttaaat attcaatgag gtaaatagct gcatagtagt aatttaataa gtagtagata  
73201 tttaaaaaac taaaaacaaa gctgcaaaac gattttccac attaatgcag aacaaaataa  
73261 agaaagaaat gcagtttttg tgaaacttta gagcaggggt caccaacct gtgcccgcgg  
73321 ggcagctgac gcccgcgagc accccttgtg gcgcccgcag ggaatgcac caaaaaaaat  
73381 cttnnnnnnnn nnnnnnnnnn nnnnnnnnnn nnnnnnnnnn nnnnnnnnnn nnnnnnnnnn  
73441 nnnnnnnnnn nnnnnnnnnn nnnnnnnnnn nnnnnnnnnn nnnnnnnnnn nnnnnnnnnn  
73501 nnnnnnnnnn nnnnnnnnnn nnnnnnnnnn nnnnnnnnnn nnnnnnnnnn nnnnnnnnnn  
73561 nnnnnnnnnn nnnnnnnnnn ngaaatagcc ctccggtctca aaaagggttg tgaacctgct  
73621 ttttagaggat attttttctt ttaatctaca tttctcaaaa acagtttaag aaagcaaaaca  
73681 gtaattcaca tagataaggt aaaagtaact gcaaggtcca gtctgtgaaac tttgaaatgag  
73741 gaagtcagc tctgtgtgga caaggttgat gattaactga aggagaaaaa gaaagaagca  
73801 cagatncaatg ctgcaggaat ccagcaccat tcagactgtc tgagcagaaa ttctaagt  
73861 ttagattttg attcacacat gatggatgaa agcagacaag aggtttcttg taaagaacag  
73921 agaggcctcc aggtgatcca ggtgaatgat tgcagagagg agagaaggat gaggaaaaca  
73981 ttcagataaa cgagaagcag gtgagtgtt aagttttgca actgcacct tggtcagctg  
74041 gattataaat acttcttcaa accacttgat ctatgaaggg gacagtgtt attaaaagaa  
74101 gaattctact ttattttgtt gtttattaga catttcaagt tcaactcaggc ttcaactgtc  
74161 acaaccaggc caagcagatt agaattcaga cgaggggaag aatcaaggat gtatcaaagt  
74221 tacaagaatt catctacaag agaggaccat agacacagag aactacatag aacaaaggat  
74281 aagccaacac tgtaggatca gggagagctc cttaaagtca ttgtggctag ttagcaaaagt  
74341 gctgccagct gtgactgctc cacaggatcc acaggtgagt gggcggagt acagccagcc  
74401 tgcattgaaa cctaagaaaa aggaaaaatg agcaacaaaa taaaacaaaa catgcaaatc  
74461 ataacatcaa tatcttcta tttttactc tccattattg tttcatgtt agaaaaagtg  
74521 tgaatattta gcttaagaag gcgtccagtt tctttttcca ctggtgtc atcagacttc  
74581 tttgtttttg tegttagat gaatagtgaa tagtaaacgt cactgaatgt ttttttttt  
74641 nnnnnnnnnn nnnnnnnnnn nnnnnnnnnn nnnnnnnnnn nnnnnnnnnn nnnnnnnnnn  
74701 nnnnnnnnnn nnnnnnnnnn nnnnnnnnnn nnnnnnnnnn nnnnnnnnnn nnnnnnnnnn  
74761 nnnnnnnnnn nnnnnnnnnn nnnnnnnnnn nnnnnnnnnn tctcatagtt cctgtctta  
74821 catactgatg cagactttga agaagaacag tatggaagga gacaggattc acatcggcct  
74881 gtgtgagaaa atggaccaga tcagagatgg agctgaacct ggatcctcaa acacaaagta  
74941 agaggcagtt tctgctaaga agctgcacta agaaagtgtc aaatgtgtc ctgtttgaaa  
75001 gtgtttgttc tttttccc tgaaaatcta ctgacataat gaaaacataa aacatttttg  
75061 tgaactgaat catgtgagca gatgacatga agttgtgaa gacagactgt tcagatctgt  
75121 ttgtgtctgc agagatcagc tgttcacaca gagagtccag tcttcagcat ccagctgtgt  
75181 gtccatgaag agtgactggt ccaagaact gaatcctcca gacttcagtg cagaacctgg  
75241 accctcagcc tcaaagtaac agagtttctc ctgagccgaa taaaacagaa atgttcaaca

75301 gataaaagca gaatcagagg aaataactat aacacactgg aagtttaatg gacagaaaat  
75361 atgttttaac acattgaaga ataaataaaa actaataaac ttaaataattt ttgacctgca  
75421 tttatattgca acgacagaac caggaagcgt caaaagaatg tccataaaaac agatgagaac  
75481 ttgacagcat gtcacaattg tgttcataatt accatcaaga atctcagta cctgtgtggy  
75541 tacagaaaag gatatttcta ttatttctga aaaccattat atcataaagt ttgtatacag  
75601 ctaaacatac aaagtgtagt taacctgctg tttaaatgaa agtaggcaat tggttttcca  
75661 gtagatctgc agcagctttt ttttttctta aacaaactac agctgaaatt cctgtttcca  
75721 acatctggaa ggtttataat agcttcatga gatctacaag aaaatgtgct gaaagtatat  
75781 aaaaaaaaaac tgcttataaaa tcataaaaaga tagattttta agtttgcaaa atcaagtttt  
75841 actgttaaga actaataaaa atataacata ccagtttata tttaatatgt acataaattg  
75901 tatttcttct aacttgatca cagaagttac tctgaactta tgacaagatt taagcatttt  
75961 ctgagaactg aattatgtga gcagatgaca tgaagtggg aatgacagac tgttcagatc  
76021 tgtttgtgtc tgcagagatc agctgctcac acagagagtc cagtcttcag catccagctg  
76081 tgtgtccatg aagagtgact ggtccaaaga actgaatcct ccagacttca gagcagaacc  
76141 tggaccctca gcctcaaagt aacagagttt ctctgagct gacaagaaca caaactgaca  
76201 ggaaggatct tgaactaaat tagattcatc aagaattata actgttatgt ctccaaatta  
76261 ctgccaataa catattccac ttggctccct attaaccact tttgattaa tatattgact  
76321 cacttttaaa acttgtgtaa aaagccactt ttgttttggg aaaaaaggtt ttctgtgatg  
76381 agggggtttt aaaataaata atgacgtgta atcggaaatt atttagtaga ttacaaaaat  
76441 aagtataaaa gaatggaatg aatgaatgaa attaaaaaaa agaaattgct ccaaagataa  
76501 aacgataaat ttgatcaatg ttgtatttct aaaggatttt tttacaatc caaaaatagt  
76561 gttgagtaaa actgaggaca aatggggaga aaccagcttg aagatcatta cagcacatct  
76621 ggcaccactt tcaatgaatt tatgtctgaa ttattaacaa agttgtacta aaattatttt  
76681 ctttaaaatc gtactataga atagaataga atagaatgag caagaacagc tttattgtca  
76741 ttgtgcatag tacaatgaga ttaagcatc cccatcagtg caagaacagt aagggagggg  
76801 aaggtagtaa ataaaacatc gtaataaat aaaataaaaa aagcaaacaa acagtatata  
76861 caagtgtgca atataagctg taaactgtat gnnnnnnnnn ntcctccacc aaacgtgagc  
76921 cacagtgata caaactgat gaagcgtcgc acaaaaacct ctgactgtac agagacacgc  
76981 tctctgactc tgaacaaaac aaactcaact gaaatgatga cagaaaatct aaaaaaaca  
77041 cagattttat tgttacaatt taaattgtat tccgttggg agttgtaaga acattttgca  
77101 tattcttttt tactattgta ataaaaacata acgttgtaaa tattatttctg gtaaacgata  
77161 atcagaaaat tcaattgaaa gattaaaagc tgcctcaaac aaatctacaa aaaatgtatc  
77221 atttcgatta attttataaaa ttcactaac tatcactttt atgtctgtct tccgggtcatt  
77281 ctgactgttt tctttttctt gtcagggttg agaacattta cttaaactta aggctcaggy  
77341 gtggctcagt ggttcagtta gttgacctg ttggaggatc gtcagtttga tccccactag  
77401 tcaactgttt ttgtgtcctt gtgtctctcc ctgcctccag tgttgatcct ctggtgtgtg  
77461 aatgctctgg tgatggctca aagggccgta ggcgtgaacc acgcatcatc tgaatgcat  
77521 caccagtaaa gaatgggggg tgaatgaata atgaacatac attttaagcc cattgagtgt  
77581 ctggaaaagc acagataaat ccaatcaaat ttatctatct atctatctat cgatcgatcg  
77641 atcgatcgat gagggaaatg cagtaaggaa aaggtgggcy gagtattttg agaggggtgt  
77701 gaatgtggag gaagatcgag atgctgtgat tgcgacggat ggaagggaaa gtagactgaa  
77761 tgtattgggt attggggagag ttgaatgaag ccttgatgag agaggaagag aggaagtga  
77821 gcaagctgag ggaaagtga aagtaggaaa ggctgcaggt gtggatgggt gtgctgggga  
77881 atgcctgaag tgtgggtgag cgatcgtgat cgagggctta gtgagattgt tgaatgtgtg  
77941 ttttgtaagt ggccatgtgc cgcttgttgg atgagtgcgt gtgtgggtta gggttccct  
78001 gcaaaaggtt aaggggtgata agtatgaat tggtagtttt aggggcatta gtctgttgag  
78061 tgtttagagg aaagtgtatg ggagagtgca tattacagtt tttctcagtc gcttttagtac  
78121 aattcccaga tcagaattga agtttgcaaa ttcgtgtgtg catttctcaa aacattttgt  
78181 acaaaactga aaacactatg ggtttcttgc aaaagcctgt aacttgetca aaatctttag  
78241 ttcactctc aaaacttagt ctttatttca ttgaacatgt cagtgccatc agaattgcaa  
78301 gtccttgtgt cattgtctac gaacaagaca gtcaaattac ttagtcatgt tgtcaatata  
78361 atgtgtactt tagagggagg ttctgatgta aactatggct aaagttttga tgacaattat  
78421 tgtaaatgta agttacaccg tattgtttga ttgcaagaga ctggacaaga ttcacattta  
78481 cacttttatg gttcatattg tactttgttg acataccatg tcataccaac atagaaaaaa  
78541 cccacaggaa acagtaacac aaagggaaaa aaaagatagg acaatattct gtacaacagt  
78601 acaggcagtt cagtaggaat tgggtgggtc ttctacacc tcttgtcatt gctgtatgtt  
78661 agggcaciaa tctcatcca catcacagcy aatctctct cttgcaatc agggaaatc  
78721 gtttgtcaca ttatgacaac ttgggtcaacc attttgcagt taataactta tacaatgaac  
78781 caatgactag gtgttttttag gagtaagact attgcacagt gaactatata atacattttg  
78841 atcaacatga cataaactat tgacaatgta gcaaagagca gagaattgta cataatcatt  
78901 tgcattggat tatcaaagca attgcaactt gttcaaagaa gtgagaaact gcttatatga  
78961 tgtgcacaag tgacatcatt atgtgaagat tgaacaaaata gtattgggaa tttcattctg  
79021 atctgagaat tgtactaaag cgactgagaa aaactgtaat agggtagtag aggggactga  
79081 gtgtatgatt ggtgaaaagc agtgtggatt caggagaggt agaggggtg tggatcaggt  
79141 gtttgttgtg agacaggtct gtgaaacgtt tttggctaag gggagggagg tgtttggggc  
79201 atttatggat ttagagaaag cgtatgatag gattgataga gaggcgttgt gggttgtgtt  
79261 gagtatgat ggtattgatg gtagattgct tgaaggcgtg aagagtttt aagaaacagt  
79321 agagcgtgtg tgagagtggy aaatagcatg agtgagttgt ttcctgtgag ggttggctg

79381 cgctcagggat gcggtgatctc tccggtggtg tttaacgtgt atatggatgg tgtgggtaaaa  
79441 gaggtgaatg aaaggggtgt ggggtacgggt gtgagcatgg tgaatactga cagcagtgaa  
79501 tggaggtgtga atcagttact gtttgcagat gatactgcac tagtggctga ctcagaagag  
79561 agttggcacg tctggttgag ggggtgtgta ggggtgtgta cagaaggaat ttgaaatga  
79621 atgtggaaaa gagtaaggtg atgaggtgta caaggttaaa ggggtgaact agattgaatg  
79681 tggcattaaa tggggagtgt ttggaagagg tagagtgttt tttcagtatt tggggctgta  
79741 tgtctgtgtg gatgggtgaa taggggggaga ggttagagttt agaatgaaca aagtacgaaa  
79801 gatatggggg gatgaagaga gtgtttgaaat gtaggttaact gggaaaggat gtgaaaagga  
79861 gattgtatga ggggtgtggtg gtgcctgcag cgttatatgg ggctgaaaca tggagtctga  
79921 aagtgggtgga aaagaggaag ctgaatgtag ttgagatgag atatttgagg agtatgtgtg  
79981 gtgtgacgcy tatggatcgt gtgagaaatg aagtaatccg agagagaacc aatcatttat  
80041 tattattatt aaacatctcc acatccatca atgactccac tgatttgctg ctgctctatt  
80101 ttcactgttt tcatctcact tctctgattg tttcatctgt aagttgatgt catcaaaaaca  
80161 aaaagtgcct cttaaaactc ttgtaatttg tcagaaagct gctctcatct ttagtgtag  
80221 tggatcaaat attaactaga gatttaacgc aggatgaaaa tgtttaaaac accaattggt  
80281 ccattgatct tctttttatg tattcatttc aattttatat cgtatggtaa actttatatg  
80341 tattcttggga aatacttttt ttttttggct ccacagacct tttatcttac actacagcac  
80401 atgttttcaa atacaaaacc tgtttaattt catttcattt cagaatcaaa atcagaagta  
80461 ctttattgat cccacacgta ggaaatttgt ttgttacagt agcattgtaa tcttaaagga  
80521 aatagaaaa taaaaaagaa cagaaaattg taattgtaaa aaagaaagaa aatgtagaa  
80581 aaataaggtg atataatgta aaagctattt ataatgtaca ggtaaaaatg tgcaaagtta  
80641 tccgttacac tatgagctgt ttaaagtggt atgtgttgg gtaggaagga atttcggat  
80701 ctttgcctcag gttcataatg agcatcttcc tcagacacat cctcctcag ttcactttt  
80761 tttgagctct caggatccct gtcatgacca aagatattga agatcgtaa actcatagaa  
80821 ctgtttttaga atcactgtta gtggatcatg catgccataa aagccccac ttaaggttc  
80881 aaggagcaga ggtcaggtgt tggagcaggg tgctcggcat ttatgggtgt ggtgggtgggt  
80941 ctttgtagtg ttgtgttctg gttttatctg tgcagatggc tacgggacag ctaacattcc  
81001 tggagccct ggagacaact gattctacac cctcctgtct gcatttacac attcattccag  
81061 agattgtata aatccccggg caggaatagg gaaggtgctc tttctttgtg ttcctgctgt  
81121 gagccctgtt ttaataaaa gcatcaggg aaattgattg agccccgata tctgatttag  
81181 aaatattggt agggtaata atccttggct tgaattcaaa accccccatc ttgctgtttt  
81241 attccaacag aatctccaaa cttcaatag atccagcagc tcagaagctg tgaacgtcta  
81301 gttgctctag aatgattcac gagaatggaa cagaaaatta tctgacacca accctgattt  
81361 tatgacattg tacatgtttt gttaaaaatc tatcaatatt ttgtgtgaa gtttgagttc  
81421 atgtgggtta ggggttgtga aaagggttat gtttgtgcaa gagttgataa gatctttata  
81481 caataacaaa cacaattatt aaaataatag aattcttttc atgagattaa acaacactat  
81541 gttcatttgg tttgaataag gtcattgca actctatatt aatccaatca gaaaataaaa  
81601 taaaattaaa gaattcagcy aatccatgca aaacaatact ttattaaaaa aagtattgct  
81661 ttcagtaaat tgagattgat gatgatcaat gttcctgttg gagtcagtgg cagcatttcc  
81721 atagagacac tttgcatcag cagctccatg ctccagtgct ctgggagact ttatagctct  
81781 gagagttgaa gactggatga ctgacagctg tcttcatca cagcagaaga cacagaaatc  
81841 ctctcatca tctcatcca aaacttcaaa actccaaaca tcttctctt cgggttcaag  
81901 acaaggaaaa aaagtatttg atttaaagat gtaaatttag atttagtaa aaaaaatgta  
81961 atcattttat tttctatata tatgtttgtt ccaaggaat taaaactga atcttaata  
82021 taataattag ataacattaa cttttagtat tatattaaaa aatctttaaa aaatatggaa  
82081 agtgattcat gtgaaatcag tgaaaatgat tttctttttt tattgtattt agataaactc  
82141 actcaggatt aagttgttcc gttgttttta tctggctata aacctatcct tcatgtcnn  
82201 nnnnnnnnaa aaattaaagc ctttggtaat ttttaaaaac gtctcagtaa tgaagaagat  
82261 aaccgatgct aaaagtcaat aatttgataa caaacatggt ttttttccat tttaaaaatc  
82321 tttaaagttat gtaaaaataa ctgaaccctg aacaaaaaag atcataatc aaactggaga  
82381 cattcgtatt tatttgaaga caacacaaaa cttgaaaaga gcaaaggact aaagtaagaa  
82441 tagatttgaa agaattttaa agagagagtt agtcagcaag agagtcagaa atttccagtt  
82501 caggactggg agcactggtc tctcctgaaa gtctctaaga ctggatcctt ggatcctctc  
82561 ttggcctgac aggtcacctt ctcccactgg tctgcagaga gcctcaggtt gctgctccag  
82621 ctgtagaggc cgtccttctg cagcaccctg gggctcctgc tctcctcca gctgctgctg  
82681 ccgaccacgt cccaggacag agtccagctt gaggggagc ccttgttggc cacacacatg  
82741 agtggtgcct tcccgtgct cagctcctc gtggagggg tagaggacag gaaccacaca gctgtcaatc  
82801 gaggcacac ctaggagaca ccaatcagct tagaggacag gaaccacaca gctgtcaatc  
82861 aaaaagctct cattggatgc agtgggttca gtttgaagaa ggtttctgtt caggtgtttt  
82921 tctgctccat cagtcattga ttcacacatt gtttacttc cttgaagaaa tctctcatgc  
82981 agatcagcaa caagacaaac ttcagtttct actgaaaaat gtcaaaactgg gttagaaaaa  
83041 gagcagatgc atctttatga agaaaacaag tttggactga atgtctttaa aaagcttcat  
83101 catacattaa agaaatgtac aaattaggac aaaaacgcaa caatcatgaa agtttactg  
83161 tgtcctaggg aaatgtctta tagaaaaaaa atgagacaa atgaaataaa ataaccctta  
83221 agacatgttc tgacaaacat aactatttta ttacaaaact gaagtactgc tcaactgagta  
83281 aatattacac aattacccat taacacagca tgtcactttt aagacaaaca taacattaa  
83341 aaaaagttga atagtgacta aaaattagtc tcttttctct cttaaattca actttgatca  
83401 aaatttttct gcaggtaatg ttcagatgct agaactcaa attttataaa cttacttcca

83461 acatccagtc tggttcctcc accaaaagtc caccacagtg atacaaactg attgaagcgt  
83521 cgtacaaaaa cctctgactg tacagagata cgctctctga ctctgtcatt ctcaactatt  
83581 tcoctaatttc ttgattccaa aacgtagaca agatatttta ttttatgatt aaggtaaact  
83641 cctttattha aatttttggt atcacacaga ttaagtttct atgtaaaact ggaaaaacg  
83701 gtgttttgaa aaaacacata aaatcagatt tttaaaatct cttagagtgg acaggggatc  
83761 agagaaggta ctacgacaac aaaaaaacta aaagtaacaa agacttttac ttacttccaa  
83821 catccagctc ggttcctcca ccaaactgga gccacagtg taaaaactga ttgaagcgtc  
83881 gtacaaaaac ctctgactgt acagagacac gctctctgac tctgaaacaa acaactcaa  
83941 ctgaaatgat gacagtgaat ctaaaaataa aacatcttag ttttagaaat taaaattttc  
84001 ttagatagta agcaataaat aaaccaattc attgtttaac tatattctgt ctgcagtaat  
84061 taatgtaata attgctcagt taaaactaaa tgggagcaac accaacaataa tgttaaaaaa  
84121 aaaaagttta aatgtctctt ttacaatgca tgcaaacgtg gcagcaggtc atatggatct  
84181 acaactttac taaagtccat gtttaaaacg ttgccctaca aaaacatttt ttttcagtaa  
84241 tagcagtaca atttcactcc aaaagtcatt cccatcatgc attgataaaa aatacactct  
84301 ttgatcagca gaagtcctgt cttaaataca ataaacagct gtgtcagtca gtttaagtaa  
84361 aacttccttt ggaaataaat ctacttttaa gaatttataa ttaaagtgtt caaaatgtct  
84421 aaaaacagtc aatgtttgca tttctattgt cctgctgctt ttgtcagct gtcatgtttt  
84481 atctacacat acagattaat gaaataaata actgttatgt gtttcctttg atcaaatgtg  
84541 ttcaccttga gtagtaattt ttaaagtcac tcagattcta atttatacct ttggagacca  
84601 caagaataat gaaaaaatct tcagaaatg aaaacaaaaa taattgtgaa aacacttaga  
84661 tgtcctcaca tcacattcaa caactttatg gtcattgat ttaaaaaaaa aaaagctcaa  
84721 agtcgtccat gatcatctga aaccaagtaa taatgttgag gatttatttg tccataaatt  
84781 attactttca atttctgatg accttgatga tgaggatgat ccatgttctt gttggagtca  
84841 gtggttagc ttccatagag acactttgca tcagcagctc catgctcggg tgctctggga  
84901 gactttatag tcttgagagt tgaaaactgg atgactgaca gctgtccttc atcacagcag  
84961 aagacacaga aatcctcctc ctntnnnnnn nnggtaaagt ccagagaatc caactcctct  
85021 cctctatgaa catccgtccc tctgaaatga aggccacaaa agcatgaagc tgctttctgt  
85081 ttctgtctct gtatcctcag agtccagagg acaggtcaca gtgactcagc ctggaccagt  
85141 gagctctgct gtgggaggat ctgtctccat ctcatgtaga accagtcagg atgtttatgg  
85201 caacaacttt ttagcctggg accaacagaa agatggagaa actcctaaac tactaattta  
85261 ccgttctagc agtcgagaat caggaactcc aactcgtttt acagggcagtg gatcaaacctc  
85321 tgatttctact ctgacatca gtggaattca ggctgaagat gcagcagttt attactgtca  
85381 gagttatcat tacatcaaca ataaggatgt gttcacacag tgaaaaacag tctgacaaaa  
85441 acctccctca ttctggctga acagaaactg aactgactgc tgcagctgga agatgctgca  
85501 gacactgaaa cagttcactg aacatccatt ctaaaaaaca cataaacaca atagacacct  
85561 tatgttgcca gatagaagga actgtctcca atttttctca gtgttcaaaa agaaccagtt  
85621 taagccggat aataatgtca atctctgtat tccatttaat aatcacaaa atagatttga  
85681 tatttcgttt ataaaaaaat cagaatattc tgactaagac acataacaga acatcactga  
85741 gataaacagt gattccatga ttttaagttct tatgataaca gagaacaggc tgtacaaaaa  
85801 gcagggcata tgaacatgca atgaaagatg aaacaagttg aagtttgacc aaccaggggtg  
85861 tcgggtttgg tgggtgaatta tgggtaacat ccttttcaaa acatgaaagt gcctaccttt  
85921 gaaaaattga caaattgtat aacaaaaaca attgtaaaac acttaaacat cattaaacca  
85981 ctttatggtc atgatatttc aggaaaaggt gaatattggc tccattatca tctgaaagca  
86041 agaattcctg ctaaggattt atttgttcat aaattttaat tccagttttc tgaatcctt  
86101 gatgatgagg atgatctatg gttattctgg agtcaatggt agcatttcca tagagacact  
86161 ttgcatcagc agctccatgc tccagtgtct tgggagactt tatagtctct agagttgaag  
86221 actggatgac tgacagctgt cttcatcac agcacaagac acagaaatcc tctcctcat  
86281 catcatcctc atccaaaaca tgactgtgat ctctcctc atctggactc tctctgtctg  
86341 ctgcttcaca ggtaaagtcc agagaatcca actcctctcc tctatgaaca tccgtcctc  
86401 tgaatgaag gccacaaaag catgaagctg ctttctgttt ctgtctgtgt atcctcagag  
86461 tccagaggac aggtcacagt gactcagcct ggagcagtg gctctgctgt gggaggatct  
86521 gtctccatct catgtagaac cagtcacagg gtggatgatg gagaggacct ttctgggtac  
86581 caacagaaag atggagaatc tctaaactg ctcatcata ccaccagccg cagtgtgtca  
86641 ggaactccaa ctcgttttac tggcagtgga tcaaaactct atttactct gaccatcagt  
86701 ggaattcagg ctgaagatac agcagtttat tactgtttgg ctgaattcta catcaacggc  
86761 aaactctcgt tcacacagag aaaaacagtc gtacaaaaac ctccctcat cagtcagaga  
86821 gaacagaaac tgaactgata cagttcaatg aagacacaca cacaagcata cagagccgt  
86881 gtcctgacat ggattaaata aaaaatatct cgtttcaaca aattaatctc ttgtctccac  
86941 gaaacaatat tctgttccca cgaaataatt aattttgtgcg aacaaaaataa ttaatttctg  
87001 cgaacataat aaaatttcat gcgattagtc attcataaac atggatgta gcaatcttgg  
87061 atttaaagta gataccttta catttctgtc tgtgtgtgtc tcattacatt gcatggaaga  
87121 cactgaggat ggtaagagat cagatttatt tatttttaaaa agcgcaaaaag caattgaaat  
87181 aacactcatg tcagtttcac tgtgtcaagg agcaaaactt ttataaaaaa taagaaatag  
87241 atattttgaa gataaataaa cctcaagaca aattctgaaa gaaaaacatt ttttgttaca  
87301 aaactgaatt aatttctact atgaccacat attatacaac taccttttaa cacagctaaa  
87361 tattttgaa aaaacaaaa acgtgagaaa aacaaatggg aggaaaaatt agcttttatt  
87421 catcttaaat ttgagactga cctatttttt ttctgaaaga aaaattgaaa atataaactt  
87481 acttccaact tccagtctgg ttctacgga gcccttagag ggcactgat aggaaaaaaa

87541 atggaggaaa aaaaatTTTT ttttgaagta aaagattttt tttgaagtaa aaaaaaaaaa  
87601 aaaannnnnn nnnnnnnnnn nnnnnnnnnn nnnnnnnnnn nnnnnnnnnn nnnnnnnnnn  
87661 nnnnnnnnnn nnnnnnnnnn nnnnnnnnnn nnnnnnnnnn nnnnnnnnnn nnnnnnnnnn  
87721 nnnnnnnnnn nnnnnnnnnn nnnnnnnnnn nnnnnnnnnn nnnnnnnnnn nnnnnnnnnn  
87781 nnnnnnnnnn nnnnnnnnnn nnnnnnnnnn nnnnnnnnnn nnnnnnnnnn nnnnnnnnnn  
87841 nnnnnnnnnn nnnnnnnnnn nnnnnnnnnn ntggttgggt ctttgaaaaa tattaacttt  
87901 aaaaaggaac ttgaaaggat tcaaggagaa acattttatt atttaaataa gaaaagaata  
87961 ccactgatgt gtctttttat tctaacttaa tttctctttt ctgtttgtaa tataaagctt  
88021 tgggttgttc agattctgtg ttttaagagaa actaaagttt gtttccatat gaaaaggtta  
88081 aatattataa ataatttgca gttaatat tcaatagacat ttagtttggc ctgtgacttc  
88141 ccttcactgc tgaattttgg cacactgtga ttttgagtat gtattacctt ttcacgctat  
88201 gtttcatggt gagtggtgac ttttaaaatc actccattta aattataaac ctttagactc  
88261 ctcaacaaaa atggagacaa aatgaaaaaa gacttcagaa attgaaaaaca aaaataactg  
88321 taaaacactt aaatgtcctc acatcacatt gaaaaacttt atgggtcatga tatttgaata  
88381 aaagggttaac agtggcttca ttataatctg aaaccaagta ttactgctaa agattttatt  
88441 gttcataaaa ttttacttcc agttttctga taatcttgat gttgagaatg atctatggtc  
88501 attctgggtg agtcaatggg agcatttcca tagagacact ttgcatcagc agctccatgc  
88561 tccagtgtct tgggagact tatagctctg agagttgag actggatgac tgacagctgt  
88621 ccttcatcac agcagaagac acacaaatcc tctctctcat catcatccaa aacatgactg  
88681 tgatctgctg cctcatctgg actctctctc gctgctgctt cacaggtaaa gtccagagaa  
88741 tccaactcct ctctctatg aacatcctc cctctgaaat gaaggccaca aaaacatgaa  
88801 gctgctttct gtttctgtct ctgtatctc agagtcacaga ggacaggcca cagtactca  
88861 gctgggacca gtgagctctg ctgtgggagg atctgtctcc atctcatgta gcaccaacaa  
88921 cacaggaatg tatggagt tcccttctcgt gtaccaacag aaagatgaaag aaactcctaa  
88981 actactaatt tacagtaact gcactcgagc atcagggact ccaactcgtt ttacaggcag  
89041 tggatcaaac tctgatttca ctctgaccat cagtgaatc caggctgaag atgcagcagt  
89101 ttattactgt ctgactctca taaccctcaa cagtctgtg gtgttcacac agtgaaaaac  
89161 agtcgtacaa aaacctcct ctctcaaaact gaacagaaac tgaactgata cagttcaatg  
89221 agcacacaca cacacacaca tacacatata caaaaataag cacgtggggg ttgttttcgc  
89281 ccccaaaact tttattttaa gtctttttta gtttatgaca gtttatagaa attattata  
89341 tctgactttg gttcagctgt ttgttcagag acaaaactgt tccatcagat gtaaagttag  
89401 tcaatgtcct gctgcagctt cagctgggat cttcagaagt ttttaaagac aagagacctg  
89461 atgagcatag aaacaatgga ggtgttgagg aacactttgt gtctctcttg ctatcaactt  
89521 acagcatttt ccatctttac attggaagga catggtggat gtctctaaact catcccactt  
89581 gacagaagtg gacctgagt ggaacaagct cccatattct gatgttcagc agcctcatga  
89641 tctgtgtaag aatccaaact taaaactgta gactctcagg tcagcagagg gttaaagtca  
89701 gtccaacatc tccctacaga gttgtagtaa acttgaagta gtggaaatg ggcaagatc  
89761 tagagcagca gatttcagtc acactgtgag aggatgatga caagtttaag gacagacatt  
89821 tagaaaccaa catcagtcct tttctttcag cagaagaaca tcagagctga caggaaactg  
89881 ctgctttgag cagaactgaa gtcccagatt ctcagctctg tgtttcatg catcacattc  
89941 taaccaataa gaaaacattg ctctctgtt gttggctttg aaagagattt actttaaaaa  
90001 ggagcttcaa aggatgctgg gagggacata ctttattgat ttattttaa aagaaaaaaa  
90061 taccactgat gtgtctttta tgtctaactt aatttctcat gtgtttgtaa aatcaagggt  
90121 tggttgttcc agattctgtg ttttaagcaaa actaaagttt gtttccatg gaaaaggtta  
90181 aacattacat attagttgag ttaatttttc aataaagtga cgttacttca ctgcttaatt  
90241 tttgccact gtgagtttga caccctgca taaagataaa tgaataaata gaacgacctt  
90301 ggggctattt cagtcagtca actcgagcag tgcatttacc tggttactcc tccctgcagg  
90361 cgggttcagtc tgatcaactc acctgttcag cgtcctactt aagttccagg tgcggtcaa  
90421 tctctttttt ccatttctgc gagctctgca ttctgacccc caccctactc cccgcttcc  
90481 acctgttagc tccgttaggg gtatgtttaa acccaaagt tctatggaa atctttgttt  
90541 tatgtatgtg aacggagcct tatgccaaaa aagaagaaat atggaataaa tcttctttac  
90601 tgcagtgatt gtctgactga aatagctgtt gtcagtcgct tcttttgac actatgtttc  
90661 acattaaatg gtaattttta aaatcactca gatttttaatt taattttaa cttcctgaca  
90721 ctgaaattgc tgacagctga tcatctgaa aaatggagca actcatccga aaattatagc  
90781 cctctagtaa aatggagagc aagtgaaaaa acttcagaaa ttgaaaataa aaacaattat  
90841 aaaacacttt aacagcatta aacagcttta tggctcatg atttcaataa aagatgaata  
90901 gtggctcctt tattatctga aagcaagtat tctgctaag gatttattg ttcataaatt  
90961 ttacttccag ttttctgaag acttgatgat caggatgatc tattattatt ctggagtcaa  
91021 tggtagcatt tccatagaga cactttgcat cagcagctcc atgctccagt gctctgggag  
91081 actttatagt cctgagagt gaagactgga tgactgacag ctgtccttca tcacagcaca  
91141 agacacagaa atcctcctcc tcatcatcct catccaaaac atgactgtga tctgctcct  
91201 catctggact ctctctgct gctgcttcac aggtaaagtc cagagaatcc aactcctctc  
91261 ctctatgaa atccgtcct ctgaaatgaa ggccacaaaa acatgaagct gcttctgtt  
91321 tctgtctgtg taccctcaga gtccagagaa caggtcacag tgactcagcc tggagcagtg  
91381 agctctgctg taggaggatc tgtctccatc tcatgtagaa ccagtcagga tgtttataac  
91441 aacaactatt tagcttggtta ccaacagaaa gatggagaaa ctctaaact actgttttat  
91501 tatgtcggca gcagagtatc agggactcca gctcgtttta cagatggtgg atcaaaactc  
91561 gatttctctc tgaccatcag tggaaatcag gctgaagatg ctgcagttta ttactgtcag

91621 agtgcctcact acatcaacag tcagtggttg ttcacacagt gaaaaacagt cgtacaaaa  
91681 cctccctcat tcaggctgaa cagaaactga actgactgct gcagctggaa gatgctgag  
91741 acactgaaac agttcactga acatccattc taacaaacac acaaacacag tagattccat  
91801 tcaagtcaat ttaattgtat ttatatacc ccaattcaca acaacagctg tctgaatggg  
91861 cttcattgag acaactaatg ttaccagatt tggctcctaat tttcttcaag tgtcttgagg  
91921 aaccagttta agccagatat tgtaaacttt tgcattaat ttactaatca aataaatatg  
91981 ttttcatata ttgtaaaaac aaaaatagtg tcatttcatt caatttgag caaaaaaag  
92041 atgcattaga tttttgtttt ttggaagatt tgaaaatcaa acaacaaact gctagatagg  
92101 tcttttttgt aaaaatgtgt ggggtatttt gttttcagtt tatatttctc caagcttttg  
92161 actgctactg tatttattgt ttcagttcaa aataaaaatt ctgaaatcct cctgagttta  
92221 ataaacctcg tccttcgctg cagttttaa cattrtagttc cttataacaa aactttaac  
92281 atcgtcaggc tgtatgtcgc taatttgcaa catgccatga aattaaggac aagaccgaat  
92341 ttagcatcac cataaaaggc aaaaaacaa acaaatgaat acttttcata taataggaaa  
92401 gacgtcaagt gtgaaggggt tgggggtttt cttgtttgtt ttcttgttta ttttattcct  
92461 caacatattt tatcacaata aaaatcagac tttgcttctg acataaataa gagtcatgaa  
92521 aataaatcag tcagcaaaag gtctttttat ttgcagataa tttttacttg ataaactgta  
92581 acaaatataa aaaagagttt aagaaaaaga atgcaaaaga agaactgcat agaaaacaga  
92641 tttatagta gaatgttcca gttcaggact gggagcactg gtctctctg aaacttttg  
92701 attctggagg gtgggatcct ctcttggcct gacaggtcac cttctccac tggctgagc  
92761 agagcctcag ggtgctgctc cagctgtaga ggccgtcctt ctgcagcacc cgggggctcc  
92821 tgctctcctc ccagctgctg ctgccgacca cctcccagga cagagtcag tctgagggga  
92881 agcccttgtt ggccacacac atgagtggtg ccttcccctg ctgcagctcc ttcgtggagg  
92941 gggcagcac tgtcagcaag ggcggcacat gaccactgc agagaaacag agaaaacatt  
93001 ttagactgga gatgaaactg ctgagtgttt cacttccctc tctaagctca gtaaacatgg  
93061 taacagacag gcatcactga tgaaccacag aaacagaagt ttctcaacta aagaaaaaca  
93121 tgatttataa aaaaagaaca ttttccattt ctaacacttc ttatgggtaa acatttctta  
93181 cagtaacatt ttaagctttt tgtgtttttc cagttcattc aagagactca ttcatgtttc  
93241 aggatttaca gctgctaaca tttttcaatc aaaaatacat cttctgtgtt ttaagcctt  
93301 agtttataat gttaattcat gttctgatag tcacaataaa ttatcatcaa ataaacatta  
93361 aatgtaacta taatctgttc aaactgatct ctatcattca tcaaagtga gctttgttca  
93421 ttttcaacta ttgtcactaa aagctcatta gaagattctg acagaaaact acaacaagc  
93481 tcagcgttgt cttgcaatta ttgaacagaa acacaaaacg ttttctgat tcacatctta  
93541 gaacagaatt ttttctctg agaaatatta aaaaagatga ggaagtata gatgtttgaa  
93601 actatgaaaa cattcctgct gtttcttga catttttata caaataaatt cataatttac  
93661 agatgtcatg actgaatcac agtttaatgt ttgataacag cagagactta aagtaaaagt  
93721 aacagata taataacatt ttaaaagcat ttacggatac atttttgaaa gatgtccttt  
93781 tttagacta aattaactat taaaacatt tatcttacct taaagaaata cattaatttg  
93841 agaataattat aaaaaatgtt ttaatgttaa tcagaccaa agttgaagtg tttataatga  
93901 atcaaaagta cttacagtca accaccagtc tggttcctcc accaaacgtg taccacagtg  
93961 atacaaactg attgaagcgt cgtacaaaaa cctcagactg tacagagaca cgctctctga  
94021 ctctgaaaca acaaaactca actgaaatca tgacagaatt tctaaaaata atacatttta  
94081 ttgttacaat ctaaattgta ttccgttgtt gagttgtaag aaaattgtgc ataattttt  
94141 taactattgt aattaaacac aacgttgtaa atattattgc attaaagcat aatcagaaaa  
94201 gattccttta agattggaag ctgcctcaaa caacaaaact caaacaatc tacaaaaaat  
94261 atttcatttt ttttaattgc tcaaaatttc atgattaact atgttcaaaa actagtaaaa  
94321 gtatgaaaga atccaggatt aaataaataa aatactctga ttaacagaaa acaactttag  
94381 agttattctg ctttctagca tttattttat ttttattata attatatcat attttcttct  
94441 aattatttgt tttttgggg agtttcactt tcttgtgtt ctctgcaaat tgtcatgttt  
94501 ttttccacat tttgataaat ggagtgatta gttattttgt ttggattatt ttttactcc  
94561 aagttgcatg ctgcattctg gaaaatttaa atgcacttaa tttatctta tttgtgata  
94621 gatccttcta agatacata ataaaaatca aacgtttgtg tgtttgtgtg tgtagaataa  
94681 tgtgagtggt caggaatcct catgacatgt ggagaactgc agcttctgac tgattcagtg  
94741 tgtttgcata tgtgtgctgc ctctctgctt ccagcagtta aagctcagtg ttgatcagtg  
94801 gccgtccagg actgtctcca tcagatgtaa atccagcaaa ctcatagtg atgacattga  
94861 ctggtatctt cagaaacctg gagaagctcc taaactcctg atagctgata ctacaatccg  
94921 tcagtgctgtt gttccagatg gtttcagag aactgcagtt cagactgat tcatctgac  
94981 catcagcaga gtttagcctg aagattcag agtttattac tgtcagcagc ataacagctt  
95041 cacacagtga aacaacttcc tacaanaacc tcaaggctgc aaaggaactg atcaacagct  
95101 gcatggaagc agatgattta cagacaaaca ccaaaacatt ttcaagctct aaagtggcaa  
95161 aaagtaataa aacattggga gtggggctcat ctggacccca caagacaagt ttttcttca  
95221 atggtttatg atctttacta ctgtctatgg attacatgga atcctctcca catttatcca  
95281 cctttgtcat ggtaaggata acaggtcaat ggtcatcttg accccacagg atagcacaag  
95341 ggttaaacca aatgtggaat ttaataaaaa aaagttttta ctaaaaaat tatattgat  
95401 caaaaaaaa ggttaaatca aataataaac aaatgcagca atgcacctt taagaattag  
95461 taaaatgtat gtcattggagc ctgtcagctc tctccccct cccctctctg cttggttccc  
95521 gatttgtctc agctgtgtcc actcaattca tcgtgtctcc agaccttcat aaggagatcc  
95581 agaaccagta ttcactgcca gttcgtttct ccagatgggt catagctctg tcgttttagt  
95641 aattctagtt atcatgtatt tgcgctgtgc taatttcct tttgccttgt catcaggatt



95701 accaaaccac aagtggacgc ctgagtttcc agattaccgc agcagtatth cctcacggaa  
95761 tctgcctacc atgtcacaaa gcttcacaga acctcagcca cgtcacgagc cacagcagaa  
95821 cctccagcct cgccacaagc catcctccaa catcaagttc caccgcaact cctaaaccac  
95881 accggagata ataaactcca ttacctgcct cttactttac ctgtgtcttc ctgtgtggtt  
95941 ccagcatctg ggtctgtcta gtctagcaag tcatgacaat tcattgtcat attgaatag  
96001 aattaaata aatttcagat gttaaagcca ttttatcaag aaatgttaaa gacagaaaag  
96061 catcagatat tttccaata aatttgcata ataatacttc acatttcctt ccagatgat  
96121 ttccttatca acctgaaacc tttttgtta atcttacttc aaatatgcta tttacagatt  
96181 gaaaaatta acaataataa agttttagtt ttttgagtca tttttgcaac atcctctttt  
96241 taatttttgc atttcacaga cttgttttgt cgttccactg aatacagtaa aaatgacatg  
96301 actcagcatt tttactgtaa tgcagtttca tgttacaata gatgttgacc atttaatcta  
96361 agattcacia caaatgatga aaaacaagat tatcaaaact gtaaaagaag tttgattctt  
96421 gcaaatgttc agtttgaagc aaactgaaga aaacttgaaa taattttaat gtctaactgc  
96481 aatttttaaa aaatatatt atataaaatg aaaaattcat attttttcat tttatacata  
96541 aatattttata agaatcggag ttcctgttgg agtcagacag ccaaagaatc agactctaca  
96601 gtgctgtgga caagagtata attttattgg aattacaaat attcaaaaat aatgtttaat  
96661 catgattatt ttaacccat ctaatatgc ctttaaata tgaattgat ttaaacaatg  
96721 tattcatccc acaggaagaa aattattaaa cacaaaaatg tgatgtcaa gaaactgtaa  
96781 gacaaagttt aatttttata ttaatttaga aaaaaaattt acatcaataa ttattaacac  
96841 ataaatgatt ttattattta taatcatgat gatggggatg atccatgttc ctgttgagat  
96901 cagtggtagc atttccatag agacactttg catcagcagc tccatgtctc agtgcctctg  
96961 gagactttat agccctgaga gttgaagact ggatgactga cagctgtcct tcatcacagc  
97021 agaagacata gaaatcctcc tcatcatcat catccaaaac atgactgtga tctgcctcct  
97081 catctggact ctctctgct gctgcttcac aggtaaaagc cagagaatcc aactcctctc  
97141 ctctatgaac atccgtccct ctgaaatgaa ggccacaaaa gcatgaagct gctttctgtt  
97201 tctgtctctg taccctcaga gtccagagga caggtcacag tgactcagcc tggaccagtg  
97261 agctctgctg tgggaggatc tgtctccatc tcatgtagaa ccagtcagga tgttcagtat  
97321 tggagcagct attacctttt atcctgttac caacagaaaag atggagaaaac tccataaacta  
97381 ctaattttact atgctagcac tgcgagaatca gggactccaa gtcgttttac aggcagtgga  
97441 tcaactctg atttcactct gaccatcagt ggaattcagg ctgaagatgc agcagttat  
97501 tactgtttgg gtcgattcta catcaacagc caactctcgt tcacacagtg aaaaacagtc  
97561 gtacaaaaac ctcttcagg cagagagaac agaaaactgaa ctgacacagt tcaatgaaga  
97621 cacacacaca cactcacaca cacatacaca tgcttttctt attttacgtt aactcaattt  
97681 ccatttttca attcacacaga aatccggttt tctgatgttt attaacagtc ttggtttag  
97741 ttttgttctg tgatcattac tgtatatgaa gtctggttta gactgacatc accccagaga  
97801 taccaaccag ctctgaggac acagctgtca atcaagaagt tcacatcggg ggccacctc  
97861 ttggaccggc cttttacagt gggggggggg gcatttttga gtgggggagg ctccggggc  
97921 gataccggag gaggttttta ggaaggtgtt ggggtgaggg gctgtagaag gtagtgtgt  
97981 gtttaggggg taggggtgga gctgtgtgct ccgtgatctg acgaggctcc agctgggtga  
98041 tggaccggct ctgggtccgt tgggtcctg ctccgtcctt gatccccatc tcagtgtctg  
98101 gcaaccgatg gcctaaatgg ctgccaccag ggacagcggg gtgcacctgt cctgtggcct  
98161 tagggccctg acgcccggct cgcccctgct ctctgtgccc tgaggggtgt ttctctacac  
98221 gtggccgggt ggggtggcgg tccccatgc tgggactgct caggctcctg cggcaggggt  
98281 actccaggtc aggggtctac agccccctct ctctgtgtct ggccgtttgg ctatggggag  
98341 atctggttcc cccaaataaa cacgtgttac atttttacag tttgcatgca tcttcacccc  
98401 catttgcccg tgcacactgt cccactgctg ctgtatccct cggctctcac ccaaatgta  
98461 ttgatggaca aaacaagtat cttctgctca tcttagtatt tccctcttgg atgtaatatt  
98521 tgtctttcaa gcagatttag cataaacgtt atgaagccta aaattttaac ctactcaaat  
98581 tagcaacttg gtctttgtat cccctcctt tctcccctc tttttgtttt cttctacca  
98641 ccccaccctc cctttcccac ttgtcttctc tctctcccct ctgtaaaaaa aaagaaaaa  
98701 tatctttaat ttgtaaaaata taattaataa ataaaaata ataaaaaaa caaatgcaa  
98761 aaaggggttt atacaaatat acagcctggc tatccgaaaa tacacaacca cttttttaa  
98821 atgtaaaacc tgtccaacac aaaaagcctt cagctctcat ctgtttactc agttattgga  
98881 caaaacaagt taaaaacaa atacaaatg ttatgactgg tttcaggtca aaaatgtttg  
98941 tcagaattct tattcttgtt ttttattttt ttatttttt atatatcatt aggcagactt  
99001 taatggacgt gttggtgagg gcaacagagg tgatgaggag gtgatggcca ggtttggtgt  
99061 gaaggaagag aatctggagg gacagatgtt ggtggacttt gcaagagga tggaaatggc  
99121 tgtagtcaac acttacttcc agaagagatg ggaacataga gtgacataca gaagtggagg  
99181 taggagtact caggtggact acatcctatg tagacgaggt catttgagag aggttaatga  
99241 ctgcaaagtg gtggtaggag agagtgtagc cagacagcac cgcattggtg tgtgtaagat  
99301 gactctggag gtcaggaaga agaagagagg gaaaacagaa aagaagacca agtgggtgaa  
99361 gctacagaat gaagaaactt ttggggaaat ttggcaaaag ttgagacagg tccctgggtg  
99421 tcaggatgag cttccagatg actgggaaac tacagcagag attatcaggt aaacatgtag  
99481 gaaggtgcta ggtgtgtcat ctggaaagag gaaagacggt aaagacgctt tgggtggaa  
99541 tgaggaagta caggaatgca tccagnnnnn nnnnncgag aactgcagca actatagagg  
99601 aataaagttg atgagccaca caatgcagct gtgggaaaga gtagtggaag ccaggcttag  
99661 gaagaaggtg gagattgtga gcagcagtat agtttcatgc cccgtaagag caccactgat  
99721 gccatttttg ctttgagaat gttgatggaa aagtacagag atggctcagaa ggagctgcat

99781 tgtgtgttcg tagatttaga gaagggcgtat gacaggggtgc cgaggggagga gctgtgtgtac  
99841 tgtatgaagt cgtctggagt ggcagagaag tatgtcagag tagttcagga catgtatgag  
99901 agaagtaga cgggtggtag atgtgtgta ggtcagacag aggaggtcaa ggtggagggtg  
99961 ggactacacc aaggatcagc tttgagtcct tttttgtttg ctaagctgat ggacagctg  
100021 acagacgagg taagacagga atctccctgg acaatgatgt ttgctgtaga cattgttaatt  
100081 tgcagtgaga gtagagagca ggtggaggaa cagctagaga ggtggagggt tgcctcggaa  
100141 agaagaggca tgaatgtcag tggtagtaag aaagaataca tgtgtctgaa cgcgagggat  
100201 caaggtagaa gcattaggtt acagggggct atatggatgt cttaacagag gacatgaagt  
100261 tggctaagt tagggtagaa gatgtccata atagagtgag gtagaaaagg atgattcgt  
100321 gtggcgaccc ctgatgggaa aagccgaaag agagagaaga agatTTTTTc tatatcattc  
100381 tttgatttaa agatcctctg aatgtcctta aaaaaatcac agcagatcct caatcatgtc  
100441 aaaaaataagc tttgactgaa tatctttaa aagtttcatc aaacataaaa tgaataacaa  
100501 ttatcagaaa aatatgccag tttttttgt acagtatac tgataactaa actgtaactt  
100561 tattatttgt gtggattttt ttttcttat tgcattctca tccagagtct tgacactttt  
100621 gaatgtggct gcaggctatt cggattaatg tggaaatcatt attttttact gaagtctatg  
100681 tttaaaatgt tgttttagca gaaactttat tgcctttaaag tatttgaatt aaatcaatga  
100741 ttgcaaaaat caatgaatca atgtctcata tttatttatt ttttttatt ccaacacata aaaataat  
100801 cttattttaa atttaaggca agaattgata tttttacggt tcacacagac caatcatgtg  
100861 taaaaaactt ttttctttaa ccaaaatgaa ataaacatat ttctatatta taaaaacagt  
100921 atgtaaaagt tggaaataat atacaaaaac attaaaagca taaagaaaa aactctactt  
100981 aattccaacc tccattccac caaagaacta ccacagtgat acaaaactgat tgtggcatcc  
101041 tataaaaacc tctgactgta cagagacacg ctaactgacc aatgactgaa aatctgaaaa  
101101 atgtgagcct agtcacatta tttcacataa aaacacagat taacaatgtg caatattttc  
101161 acataaattc aataaaaagt cttctattat taattttgac atttttgttc ttttttttt  
101221 ttagaataag catttaattt acaaaatttg ccatttcaga ttaaataaaa atatgttctt  
101281 agtcaaataa tttttttttg ctttccgcat ccctttttta cagtgaacac agatgcactt  
101341 tattgtataa acttgaattt tgtattttta ctgataaaaa aaaaacatga ttttattttt  
101401 caatattggt atttattgga atccatgttc ttgttggagt cagtggtagc atttccatag  
101461 agacactttg catcagcagc tccatgctcc agtgctctgg cagactttat agtcttgaga  
101521 gttgaagct ggatgactga cagctgtcct tcatcacagc agaagacaca caaatcctcc  
101581 tcatcatcat catccaaaac atgactgtga tcttcgtcct catctggact ctctctgct  
101641 gctgcttcac aggtaaagtc cagaaaatcc aactcctctc ctctatgaac atccgtcct  
101701 ctgaaacgaa ggccacaaaa gcatgaagct gctttctgtt tctgtctctg tatcctcaga  
101761 gtccagagga caggtcacag tgactcagcc tggaccagtg agctctgctg tgggaggatc  
101821 tgtctccatc tcatgtagaa ccagtcagga tgtttatagc aacaactgt tagcctggta  
101881 ccaacagaaa gatggagaat ctctaaact actaatttac tatactagca ctcgagaatc  
101941 agggactcaa actcgtttta caggcagtg tttactgtcag agtgctcact acatcaacag  
102001 tggaaattcag gctgaagatg cagcagttta ttactgtcag agtgctcact acatcaacag  
102061 tcagtatgtg ttcacacagt gaaaaacagt cgtacaaaaa cctccctcat tctggctgaa  
102121 cagaaactga actgactgct gcagctggaa gatgctgcag acactgacac agttcactga  
102181 acatccattc taacaatcaa aaacactgac aatagtcacc ttatgttacc agatataagg  
102241 atctgctcct gttttttact caggaaaacc agttcaaacc agattagccc gttcgttaat  
102301 tattatatta attattatat taagtaatat atttatttca tcttttgcaa aaataaaaa  
102361 ataaaactcg attaatcca tgaagaagta cgatcgaaaa attgtgat ctaaattaa  
102421 gcttttagga agacagagcc aacaggagtg ttataacatc tgagtgatg gatgagtggtg  
102481 tctgtggaca gactcaacc ttttgactca ctgactcctt acaaagcaga atacatcttt  
102541 aatgaatcag tggttgtaat gaaaaatata tattagtgaa cagaagcagt ctcatatgtt  
102601 ttataagcta tactgttcta caagcctaac attactgtaa actcgcgtga aataaatttt  
102661 tattgcttta aatgttcaat gaactgtaaa taactgcata gtagtaattt aaatagtagt  
102721 agttatttaa caaactaaaa acaaagctgc aaacagattt tccacattaa tgcagaacaa  
102781 aataaagtaa gaaatgcagt ttttgtaaaa ctttagagga tttcttctt ttaaactaca  
102841 tttctcaaaa acagtttaag aaagcaaaca gtaattaaca tagataaggc aaaagtaact  
102901 gcaaggtcca gtctgtgaa tttgaaatg gaagtccagc tctgtgtgga cgaggttgat  
102961 gattaactga aggagaaaag gaaagaagca cagatcaatg ctgcagggat ccagcacatc  
103021 tcagactgtc tgagcagaaa ttctaagt ttagagtttg attcacacat gatggatgaa  
103081 agcagacaag aggtttcttg taaagaacag agagacctcc aggtgatcca ggtgaatgat  
103141 gtcagagag agagaaggat gaggaaaaa ttcagagaaa cgagaagcag gtgagtggtt  
103201 aagttttgca actgcacctt tggctatttg gattataaat acttcttcta accactgat  
103261 ctatgaagag gaaggtgctt attgaaagaa gaattctgat ttattttgtt gtttattaga  
103321 catttcaagt ttgatcagcc ttcaactgtt acaaccgggc caagcagatt agaatccaga  
103381 cgaggggag aatcaaggat gtatcaaagt cccaagaatt catctacaag agaggacat  
103441 agacacagag aactagatag agcaaaggac aagccaacac tggtaggatca gggagagttc  
103501 cttaaagca ttgtggctag ttagcaaagt tctgcccagc gtgactgctc cacagatcc  
103561 acagtgtaat gggcggaatc acagcagcc tgcattgaaa cctaagaaaa aggaaaaatg  
103621 agcaacaaaa taaaatcaaa catgtaaatc ataacatcaa tgtcttctg tattttactc  
103681 tccattattg tttcattttc agaaaaagtg tgaatattta gcttaagaag gcatccagtt  
103741 tctttttcca ctgggtgtcac acatcagact tctttgtttt tgtcgttatg atgaaatggt  
103801 aatagtaaac gtcattgaat gttttttgtt tgtctacatg gatgtgataa agtcagagtt

103861 atcccagtc agatgtattc atttaataga ttgttatttt gtgaaactca aaataaatca  
103921 acattttgtg gctcaggcta tatcaacaca aagtttattc ttaatctcag gcttttattt  
103981 ttttaaacct tctttaaagt ttggctctgt ctcgatgcag actttgaaga agaacagtat  
104041 ggaagaagat atgattcaca ttggcctgtg tgagaaaatg gaccagatca aagatggagc  
104101 tgaacctgga tccctcagaca caaagtaaga ggcagtttct gctaagaagc tgcactaaga  
104161 aagtgacaaa tgttgctctg tttgaaagt tttgttcttt ttccccttga aaatctactg  
104221 acataatgaa aacataaaaa cattttctga gaactgaatc atgtgacatg aagttgtgaa  
104281 tgacagactg ttcagatctg tttgtgtctg cagagatcag ctgctcacac agagagtcca  
104341 gtcttcagca tccagctgtg tgtccatgaa gagtgactgg tccaaagaac tgaatcctcc  
104401 agacttcagt gcagaacctg gaccctcagc ctcaaagtaa cagagtttct cctgagctga  
104461 ctagaacaga aactgacagg aaggattttg aactaaatta gattcgacaa gaatttaaac  
104521 tgttatggct ccaaactact gccaaatata tattccactt gatccactat taaccactgt  
104581 ttgatttaat atattgactc acttttataaa cttgtataaa aagccacttt tgttttggta  
104641 aaaaagggtt tctgtgatga ggggttttta aaataaataa agacatgtaa tccggttattt  
104701 agttgattac aaaataagta taaaagaatg gaatgaatga atgaaattta aaaaaaaga  
104761 aattgctcca aagataaaac aataaatttg atcaatgttg tatttctaaa ggattttttt  
104821 aacaatcca aaatagtgtt gagtaaaact gaggacaaat aggagaaaac cagctgttag  
104881 atcattccag cacatctggc accactttca atgaatttat gtctgaatta ttaacaaaag  
104941 tgtactaaat tttttttttt ctttaaaaat cgtactatag actattttta atgcaaaaaa  
105001 atgactgatt tttcagtgaa attcttaatg acaggctgtg gggctgattt atccattctc  
105061 atgatctgtt tgtgtctgca aaaatcacct gctcacacaa aaagtccagt ctccagcatc  
105121 cagctgtgtg tccatgaaaa gtgactggtc caaaaaacta aatcctcaa acttcagtgc  
105181 tgaacctca aacacaaaag aaaagagttt cttcaaaaat gagctgagag cagcaaaaaa  
105241 gtttgcata cagctgttaa cacacagatg cagatgtgac cactgtcact ctgaggcaaa  
105301 aatgctgttg agaaccagg gatgaacttg aaagatgcaa caaagtcaca aaaatctaca  
105361 ttcaaaaaac atataactca gtacacagac atggagacct acagatgaaa ctggacagac  
105421 cacaacaccc agagaaagtt ctttaaaagc attatggata attgacaaag tgatgccagc  
105481 tgtgactgct ccacaggatc cactgttgaa tgggaggagt cacagcaagc ctgactgaa  
105541 acaaaaagaa aggcaaaagt ttgacaaaaa aaaagcaaat cgtaacaaac acaactaaa  
105601 tataatcaat ctacatgaa taaagagaca taaaataaaa aagcactttg tgtgaaatga  
105661 aaagcgttaa acaattaaag tttgaaagt ttaagattcat tgataccact gcagtgctg  
105721 ttattgtgag gaaaaatag cctgcattga tatttgagac ggaataagtt tcatgcattc  
105781 atctatgttt agctgttcat tgatcagttt tggttgtgct cagaatcttt tcttctgtt  
105841 gtgcacagag agaggaagag gagtgggtgt tgtgtgaagg agcagccgtc cacttgtgct  
105901 ttgtgtcagg atgtactgaa ggatccggtc tctaccatct gtggacactg gttctgtaga  
105961 cagtgcataa cctcctactg ggaccggctc gctcaaccag gactctgctc ttgccccag  
106021 tgtgcagaaa ggtccaacag cagagccctca cgcagacag tcaactgagag caccggggac  
106081 caaagtaaga ctgagcccc ttctgctgat gtctcagagc ttaacttctg ttttttggga  
106141 catcacatga agtcattagt tattttcttt ttttccgag cacatgttgg tctgcccggag  
106201 ctttagatga acaccagatc agnnnnnnnn nngtttgctc gcttcttca tggcctctct  
106261 attgagtcga actccaaact cttgggtagc ctgctgggtc agacagagaa cagtccagaa  
106321 accattcaaa gagtcatcaa caacctacag caggtgaaca gtggagactg caaaagggag  
106381 atggatttca tcacaacaaa gatgatcaaa gatgaagtgt ctctgacag aagaatcaac  
106441 gttttccatt gcatgatgga gatgacagac ctctcagttc atcggggagat ccacaaattc  
106501 ctaaaatcaa aggacaaaat ggagaaggat ctctcagaga tgcagtgatt agctctggcc  
106561 tacatgctgc agatgtcaga agaggttctg gatgagctgg acttgacca atacagaaca  
106621 tcaaatgagg gtcgaaggag actgatccca gctgtgaaga actgtaggaa gtttaggtaa  
106681 gactagtttg agtttagccta aatcattggt atgtgtcatt ccaaccttgg aaccagagat  
106741 attattttca ttattaataa tattgttgtt gtcgtttccc acaacagtag acttatattt  
106801 actgtttgta gtctaaaagt tctgctgta agttgttctg atgagatttt cctaacccta  
106861 acccgaagct caaattattc tgttgaagct tcaaaaaaaa gcaacacaaa gatattaatc  
106921 aagaaaaaat atacatcaag ctgctttgtc ttcatttcat gaggacttca gaagttttcc  
106981 tttttctttg tcttccaggc tgagaaactg tggactctca gagactgact gtgaaacagt  
107041 ggccttggct cttctatccg acccgtctca cctgacaaaa ctggatctga gtggaaacga  
107101 gcttcaggat tcagcaatga tgcttctgtg tgctggactg gagaatcaa actgcagact  
107161 ggagagtctg aggtcagaaa atgagttcgt ttttatctag attagccgtt ctttgtgct  
107221 acttttgaag tacaagaagt gttttatata ttaagttttg atttatagaa ctttattttt  
107281 gttctgaatt caggctgagg atctgcagtt tgtcagattt tagctgtggt cttctgggct  
107341 ttgctctgat gtccaacctg tcccactga aagaactgga ccttagaagc gctgactttc  
107401 agagttcagc aatgcagcat ctgtgtgctt ttctggagaa tccacactgc agactgaaga  
107461 ctctgaggtc agctccatct ttaagttgtg ttgagatgaa caataaagtt atgctgaaag  
107521 tgagccgtag acatgagct gatataaac agcttcatgg tggagatttt cttctttatc  
107581 atctgctttt gccgtttcct gtcttttctc tcacatgtga agtttattat tctctttagc  
107641 ttttaaacact caaaacccaa gttttacagt tatttttctc ttaaacttat ctctctttg  
107701 gatacagggt ggtgaactgc actttgtcaa agttcagctg tgcagctctg gtctcagctc  
107761 tgaagtccag cccgtcccat ctgacagaa tggatttgag cttgaacttc attcaggatt  
107821 caggagtgga acttctgtgt gcctttctgg agacgtcatg ctgccttctg cagactctga  
107881 ggttacagag cttctgtgtt tcatgaagct caggaacaac ttgcatcatt caagatgtga

107941 ctgctgttta gcttcttttc taaatatggt ctggtgtttc caaagagtaa tatttgatgc  
108001 agaaagttaa tcaatgattt actgatagtt tttacagctc caaaacaaaa cctgttttga  
108061 gaagaacctc tgtactcaga cagtttctac atgaaaagct atatatgggt tgacctttga  
108121 cccaacacac attcagctgg taccatgtg tgctgacatg aacaagtgta atgatccaca  
108181 tgaaggacta agtcccctaa ctccactggt tgaagaatgg agcacctgaa aacagctgct  
108241 ggtgtcatgt ctgttctggt ttcagggttg agcgctgcag gttgtcagtc atcagctgtg  
108301 ctgctctggt ctccagctctg aagtccaacc catcccatct gacagaactg gacctgagtg  
108361 ggaacaagct ccaggattct gatgttcagc agcttcatga tctgggtaag aatccaaact  
108421 tcaaaactgga gactctcagg tcagcagaga gtccaacatc tcccaacaga gttgtagtaa  
108481 acttgaagta gtgaatatga gggcgaagat ttagaatfff ctgtgaagca gcagatttca  
108541 gtcacactgt gagaggatga tgacaagttt aaggacagac atttagaaca caacatcagt  
108601 ccttttcttt cagcagaaga acatcagagc tgacaggaaa ctgctgctct gagcagaact  
108661 gaagtcccag attctcagtc tgggtgcttca ttgcatcaca ttctaacca atagaaaaca  
108721 ttgcatctct ccacatcatt cttcttctct ctacagggtg aagtgatcaa aagttgttct  
108781 gagagtttga tctttctcct gatggtcaga aggaggaaag agcagcaaag tcaggaaagt  
108841 gtctaagttg gagagatgac tgttggagct gcagctgaaa catcatgaaa aatggattct  
108901 tctcttctctg gctcatgaca aggaaaaaaa gtatttgatt taacgttga aattcagatt  
108961 taatcaaaaa aatttaatca ttttattttc tatatatatg tttgttccaa ggaattttaa  
109021 acttgaacct taaatataat aattagataa cattaacttt tagtattata ttaaaaaatc  
109081 tttaaaaaaa tatggaaagt gattcatgtg aaatcagtg aaatgatttt ctttttttat  
109141 tgtgttttaga taaactcact caggattaag ttgttccgtt gtttttatct gtctataaac  
109201 ccatccttca tgttcaggac agctttactc attgaagtct attttttcag tcaagtttca  
109261 ttgtttattta aatgtttttg atgttattttg ttcattaaatg atttttgaag ttttaatttc  
109321 agtacagatg atggaatggc atttgtgttt ttccacttca ttcaagatg tcattcagt  
109381 ttcagcattt acagctgcaa acatttctca atggaaaata catcttttgt gtttttaagc  
109441 cttactttat aatgttaatg catggcttga tattctcaat aaattatcat caaataaaca  
109501 tcaaaatgta actataatct gtttttaaac tgatttctat cattcatcaa agtgagctt  
109561 tgttcatttt caatcattgt cactaaaaagc tcattagaag atgctgacag aaactgacaa  
109621 caaggtctag tgttgtcatc aaattattga acagaaacac aaaatcttct tctaattcac  
109681 attttagaag agaatttttt ctctgagaaa tatttagaaa gacgaggaag ttacagatg  
109741 ttgaaactat gaatacattc ctgctgtttc tttgacattt ttatacaaat aaattcataa  
109801 tttacagatg tcatgactga atcacagttt aatgtttgat aacagcagaa acttaaagtt  
109861 aaagttaaaa atcaattata acatttttaat tgcatttaca gatacatttt tgaagacgt  
109921 cttttttttt agaactaaat taactattaa aacaatttgt cttacttaaa agaaatacat  
109981 tgatttttaga atgttattaa aacatgtttt aatgttaatc agaccaaag ttgaagtgtt  
110041 aataatgaat caaaagtact tacagctcaat caccagctg gttcctccac caaagctgag  
110101 ccacagtgat acaaaactga tgaagcgtcg tacaanaacc tctgactgta cacagacacg  
110161 ctctctgact ctgaaacaaa caaactcaac tgaaatgtca gcaaaaaata tctgaaaatg  
110221 acacatctta attttagaat ttaaatatga tattgtaaat gtgtttgttt ttcagaaaac  
110281 tgtaaataat gtttgattgt tttctttctt caaaaacggt ttaataaacc aacttaataa  
110341 taaatgccag aatgactatc tgtgacctgt gaacattgac aataataaag ttttagtttt  
110401 ctaagtcatc tttgcatctc aaagactttt ttacagggaa tacagaaaaa ttgacatgac  
110461 ttgactttta cccttgtgct atttaacatt gagagtgggg tcatctagac ccactagaca  
110521 gtgcaatgaa cctttttctc tcaatgattt gtgatcttca ctggtttca tggattacat  
110581 gaaatctttc cacctttatc cacctttgtt atattagggg gaaaacatca tgtaaggggtg  
110641 gggctcatagg atagcgcaag ggttgatact gatttatgtt acaaaaagatg ttgacctttt  
110701 aatctaagat tcatacaaaa ttatgtaaaa caaaattatc aaaaatgtaa gaaaagtttg  
110761 attcttgcac atgttcagtt atatgcagac ttaagagcac ttgaaagaaa gattaatgtc  
110821 aaaatttttt aaaatgtaat tttttttctc atctataatc tgaaatacaa agttgataca  
110881 ttttcatttt atgtattaat attataaga atccgagta ctggtggagt cagaataaaa  
110941 ataattaatt aaaaatgtga tgttcaagaa actggtgtaa atagttttat ttttatataa  
111001 atttggagac agaaatgaca tcaataatta ttaaaacata tatgattcaa tttattgata  
111061 atcatgatga tgaggatgat ccattgttct gttggaatca gtggttagcat ttccatagag  
111121 acacttttga tcagcagctc catgctccag tgctctggga gactttatag tctctgagag  
111181 tgaagactgg atgactgaca gctgtccttc atcacagcag aagacacaga aatcctctc  
111241 atcctcctca tccaaaacat gactgtgatc tgcactctca tctggactct cctctctgc  
111301 tgettccacag gtaaagtcca gagaatccaa ctccctctct ctatgaacat ccgtccctct  
111361 gaaatgaagg ccacaaaagc atgaagctgc tttctgtttc tgtctctgta tctcagaggt  
111421 ccagaggaca ggtcacagtg actcagcctg gactagttag ctctgctgtg ggaggatctg  
111481 tctccatctc atgtagaacc agtcaggatg tttatagcaa caacttgta gcctggtacc  
111541 aacagaaaaga tggagaaact cctaaactac taatttacta tagtagcact cgagaatcag  
111601 ggactccaac tctgttttaca ggcagtggtt caaactctga tttcactctg accatcagtg  
111661 gaattcaggc tgtctgagcc ttctagagaa ggagctttgc tgtttgtcca gaagaggggtg  
111721 gagaggatgg tctgggttgt ccatgattga aaggagtctg ttcagtgacc tctctccat  
111781 cactgcttca aatgtgtcct gtttgagacc aatgacagaa tccgccttcc tgatcagctt  
111841 gttcagctctg ttgggtgtcac tgactgcaat gctgcttccc cagcagacga cagaggagaa  
111901 caaggtgctg gccaccacag actggtagaa gatccccagc atcttgctgc acacattaaa  
111961 ggacctcagc ttccttagga agtagagtct gctgcaggcc tctttgtaca cagcagggt

112021 gtggctcctc cagctcagtc tgctgtcgat agtcacatcc agatatttat acttctccac  
112081 cgcttccaca tccttgccca ggatgcagag gggttgtaag actagtagct cttagtagct  
112141 ctgggagtcac ttttctctga cctgactata tattttgtgg aaataacacc ataatagttg  
112201 acttgatgtc cggccctttt ctttcaacat ctctgacatc tgagtccttc tgagtgaaag  
112261 tctgggttttg ttcaggttca tactcagcct cttcctcaga cacatcctcc tcagctctcg  
112321 tttttctga gtcaccagga tcattagga aatatgtgaa acagtgaaacc tcttgctcct  
112381 gtagaatgat tcaactagaat ggaactaata atatctcaca caaactgt ttttaacaaa  
112441 caatgtacga acaatgaaca tattttatta gaaatcggtc caaatatgtt gtgagaatgt  
112501 ttgagttcat gttgtgtagg gattgtgaaa ggggctatgt ttgtgcatga gtcaataaaa  
112561 cctttacaca cttaaactag attataaaa aacagatttc ctcttatgag agtaaaaaaa  
112621 tttatgtatg tgatgtttaa atggggttca cagcaactct attttaacc aattaaaaaa  
112681 ataagttatg aaatgattca aaaaattaat gcaacacaat attttgtaa aaagttgtac  
112741 ttgcagtgaa tttgtattga caaatctcca gattcctgtt ggagtcagtg gtagcatttc  
112801 catagagaca ctttgcatca gcagctccat gctccagtc tctgggagac tttatagtc  
112861 tgagagttga agactggatg actgacagct gtccttcatc acagcagaag acacagaaat  
112921 cctcctcatc atcctcatcc aaaactgac tgatgactgc gtctctcatc ggactctcct  
112981 ctgctgtgc ttcacaggta aagtccagag aatccaactc ctctcctca tgaactccg  
113041 tccctctgaa atgaaggcca caaagctgtt aagctgcttt ctgtttctgt cctgtatcc  
113101 tcagagtcga gaggacaggt cacagtgact cagcctggag cagtgagctc tgctgtggga  
113161 ggatctgtct ccatctcatg tagaaccagt caggatgttt atagcaacaa cttgttagcc  
113221 tggtagcaac agaaagatgg agaaactcct aaactactaa tttaccatgg tagcactcga  
113281 gaatcagggc ctccaactcg ttttacaggc agtggatcaa actctgattt cactctgacc  
113341 atcagtgga ttcaggctga agatgcagca gtttattact gtcagagttt tcatgtcatc  
113401 aacagtcagt atgtgttcac acagtcgtac acagtcgtac aaaaacctc cctatctggy  
113461 ctgaacagaa actgaactga ctgctgcagc tggagatgc tgcagacact gaaacagttc  
113521 actgaacatc cattctaaca atcatacaaa cacaatagac acttaatgtt accagatttg  
113581 tttctaattt tcttcagtag tcttataaaa ccagtttaag cgagataata ttgttaaact  
113641 tgccattaat ttattgatct catataaatg ttttcatatt ttgcaaaaaa aaacaaaaaa  
113701 acaaaaagg ttttttaatt ttattcaatc agcagcacga aaagatacat tagatttttt  
113761 tghttttaga aagattttaa aatcaaaaa caaactgcta aataagtgca attcaaaagc  
113821 acacttcttt ttttttgtt aaggtattac attttcagt caaatttttt gcaaaact  
113881 aaagaataat tttcatataa ttgaaaaaa gtctagtgtc ctatgtgtta ctatttattt  
113941 tattattcac aataaaatat cagtttgctt ctgtcacaaa agagtcagtg aaggaaatca  
114001 gttggcaaaa ggtcctttta tttgcagata cattttccta caaaaactgt aacaagtcga  
114061 aagagtttaa gaaaaagaat ggaaaaaga aactgcagatg aaaacagatt tatagtcata  
114121 gttccagatc aggactggga gcactggctc ctccctgaaag tcttgattc tggagggtg  
114181 gatcctctct tggcctgaca ggtcaccttc tccactgggt ctgcagagag cctcaggtg  
114241 ctgctccagc tgtagaggcc gtccttctgc agcaccocgg ggctcctgtc ctccctccag  
114301 ctgctgctgc cgaccacctc ccaggacaga gtccagtcctg aggggaagcc cttgttgcc  
114361 acacacatga gtgtggcctt ccctgctgc agctccttcg tggaggggga cagcactgtc  
114421 agcaagggcg aggcacacc taggagacac caatcagctt agaggacag aaccacacag  
114481 ctgtcaatca aaaagctctc attggatgca gtggtttcag tttgagaag gtttgtgttc  
114541 aggtgttttt ctgctccatc agtcattgat tcacacattg tttcacttcc ttgagaat  
114601 ctctctgca gatcagaac aagacaact tcagtttcta ctgaaaaatg tcaaaaggg  
114661 ttgaaaaaag agcagatgca tctttatgta gaaaacaagt ttggactgaa tgtctttaa  
114721 aagcttcatc atacataaaa gagatgtaga aataagggca aaaacataac aatcatgtca  
114781 gttttctgtc agaaaatcct tgacataaga atttaaagt ctgaaatc aggtctcca  
114841 aaatccgtcc agaaagacaa ttttgtgagt taaatctacc ttttaataca ctatgaccta  
114901 attaaataaa aaataaaaaa cacacactgt taatagcaca gtttttaatg caaaaaacta  
114961 ttttaagttg aagtcttcta ctaaaataa gtttagttca aatcagaaaa aactgaaact  
115021 caataataat ttttcttcac ataatttta aaaatttatt ctagtctggt tcttccacca  
115081 aaagttctcc actgtgatac aaactgactg atgtgtttta caaatatctc tgacagtaca  
115141 gagactttct ctccagctgt ttcaaaataa ataaactaaa tatttcagat ttcttgattc  
115201 acatagaaat gatgatattt ttaattataa ggcaacacaa ttttatattt tcaagttta  
115261 cacagaataa attctattat aaaaaatgta ttttaccaaa aataatagaa tgtcttttt  
115321 tgatataaaa tagtaagtaa ggatcaatta aagaaggaaa taagacatga acaaaaaaa  
115381 agaatacaaa gatctactta ctccaaact ccagtcctgt tccctccca aacgtccacc  
115441 acagtgatc aaactgattg aagcgtcgtta caaaaactc tgactgtaca gagacagct  
115501 ctctgactct gaaacaaaca aactcaactg aaatgatggc agtgaatcta aaaataatac  
115561 attttattgt tacaatgtaa tctgtattcc gttgagttgt aaaagaaatg tgtataattt  
115621 tgtaactttt gtaataaaac attaaatatt attgcattaa agcacaacca caaaattcaa  
115681 ttgaaagatt gaaaactgcc tcaaacaaaa ctataaaaaa tatatcattt tgattaatg  
115741 ttgcaaaat gcatgattaa ctatgttata aaactagtaa aagtatgaaa gaatccagta  
115801 ttaataactt taactttata gttactttac tttctagcat ttatattcat tctttcaat  
115861 tatttgtttt ttgggggagt ttcactgtcc tgctgttctc tgcaaaactgt catgtttttc  
115921 tccacattat gataaatgga gtaattagtt attttctttg gattattttt gaactctagg  
115981 cttcattctg gaatatttta aatgcaccta attttggtta cttgtgttac agacatcttt  
116041 aagataaatc aataaataaa aaaaagttta tgtgtgtgtt tgtgtgtgtc gaataattag

116101 agtgtagact agaggaatcc tcatgacatg tggagaactg cagcttctga ctgattcagt  
116161 gtgtttgcat atgtgtgctg cctctctgct tccagcagtt aaagctcagt gttgatcagt  
116221 ggccgtccag acctttcaga gacactgact cgccccgagc acaatgatga tgcactgac  
116281 tctgtctgctc ttcaccctgg agctcctgct tcagggtagc actgtctctg gaaagctttg  
116341 attcaagcag caaccagggt cccacaatg atgttctgct atgatggaga aacctgaaa  
116401 ctagcagcac tgagcttctt cttctggatg tgaagaaat gatcctcttc tgtttggatg  
116461 ttgataatct tactataagc tgcttttctc tcaattatc taccttttct tgttttcagc  
116521 ttcacagcaa gaaatcctcc tcaactcagc tccctggagc cagtctgttg ttgaaggaca  
116581 gactgtctcc atcagatgta aatccagcaa actcattggt gatgacatta actgggatct  
116641 tcagaaacct ggagaagctc caaaactcct gatataatgat actacagctc gtcagctctg  
116701 tgtccagctc cgtttcagtg caactgcagt tcagactgat ttcactctga ccacagcag  
116761 agttcagcct gaagattcag gagtttatta ctgtcagcag cgtaacagct tcccgttcac  
116821 acagtgaaac aacgtcgtac aaaaacctca aagctgcaga ggaactgatc tacagctgca  
116881 ctgaagcaga ggatttacag aaaaacacca cctcagatta gacctgaatt ttaggttttg  
116941 gttttttcat aaatgattca caataacgac aagaaaactt tttgcttca ccttgacttc  
117001 atgtagacgg aatcaagctc tgacccaaaa taaacttaca taaattgaag cttttattaa  
117061 aattttacaa aaggacatca caagtttttt tggatattta aaaaaatca tgaaggatac  
117121 caccagccta taaaagctca cttgtcaca ggcttccctg tgttcacatt tgagctctag  
117181 tcatctgcaa acatcacaaa ctgtctgata gaaatagtga ataattatct tactcattat  
117241 taaatcaggg gtaaaacaat ttacggaaaa ctgtcttcat tgaactcaca aaaactatta  
117301 aaagtgatca tttgacctct tttctgtcag aaatgtatag aaatgtcaa atcctcactt  
117361 catctcttac ctcccctctt acctcaaaaca tctcctttgt gtcatggtga gtttattttt  
117421 atttgattca cattttcttt gactttctgt tcatcaaact ttacaaaaac aaacaggagt  
117481 tcatgaacgt tacctttatt tactgaatct tcagtcactg tgatctctgt gtagctcccg  
117541 acagtttctg tggctccagc tctgaaccaa agcctttatg tgagtttttc ataactaaca  
117601 gtaaatgtct ttaatcataa atcttcccta ttttgggaacc acttcacagt tattgggtaa  
117661 acccactcca tgtccactaa acgtatctgt gagaaacact ttcacatgta ttccttaggt  
117721 aacctgattc ttttttctat caatagtaaa atccattact gctgaaagct gtctccaaag  
117781 aaattcattt cttcttctgc agaattttta actgttttta tagtggcttt acataaactg  
117841 aagtaacaaa atattttatt ttagtttatt ttatttagtt tgttgccttt gacctctctc  
117901 tctgtctcaa ttctaaatgt ttttattaat ttgttttaaa cttatctgcc actgtttagt  
117961 tgatttcttt aaactttcaa aaaatgtccc aaatgctaca attagaaaaa tacacatata  
118021 tatgttaatt ataaaaatat tccatgtttc cgttggagtc agtggtagca tttccataga  
118081 gacactttgc atcagcagct ccatgctcca gtgctctggg agactttata gtccctgagag  
118141 ttgaagactg gatgactgac agctgtcctt catcacagca gaagacacac aaatcctcct  
118201 cctcatcttc ttcacccaaa acatgactgt gatctgcgtc ctcatctgga ctctcctctg  
118261 ctgagactca acaggtaaa tccagagaat ccaactcctc tccctctatg cctaccctcc  
118321 ctctgaaatg aagccacaaa aagcatgaag ctgctttctg tttctgtctg tgtatcctca  
118381 gagtccagag gacaggtcac agtgactcag cctggaccag tgagctctgc tgtgggagga  
118441 tctgtctcca tctcatgtac aaccagtcag aatgttcata acaacaacta ttagcctggg  
118501 tactaccaga aagatggaaa aactgctaaa ctactgttct actatgttgg aagcagagta  
118561 tcaggaactc caactcgttt tacagatggt ggatcaaact ctgatttcac tctgaccatc  
118621 agtggaaatc aggtgaaga tgcagcagtt tattactgtc aaagtcttc cagcatcaac  
118681 agtcagcttc tgttcacaca gtgaaaaaca gtcgtacaaa aacctcctc atctggctg  
118741 aacagaaact gaactgactg ctgcagctgg aagatgctgc agacactgaa acagttcact  
118801 gaacatccat tctaacaatc aaaaactctg acaattgtcc tttaatctta ccagatataa  
118861 gaacttgctc ctgtttttta tgcagcctga taataatgta aacgtcttca attaataat  
118921 taattaccaa tatatatttt atcttttcta aaaaacaaaa acaaaaaaaa aaatacagat  
118981 tcttctctct aagaagtaca attaaaaagt attatattat ttaagctgtt aggaagacag  
119041 atccaacaga tgtgttataa gatttcggag tgttcatgag tctgtggaca ggctcaacc  
119101 ttgagactca ctgactcctt tcaaagttag atataaagct tttatgaatt cactggttga  
119161 tttaaactca tctttaacct cctcacacct gaatttata tttcaaataa ataaacaaat  
119221 attgtcttta atgtttttta cattcaaggt gatgtttatg attttgtgga agattatctg  
119281 gttacagtca ctagtcattt tagaaaaaac aaattagaaa ataaagtcta ataccttaca  
119341 aagtaatatt taaatcttaa ccaagacaaa agtacttttg ttcacgtacc ctggatggat  
119401 gactttgtag cagaaaagtt ttataagtgg tcattcagac ttggtttatc ttatgttga  
119461 cacatttctg gtcaacatgt ctacacttaa aaaaatcagc tcagaaacct ttttcaaaa  
119521 aactttgtgc taagccgaaa gttatcaaat tatttaaatg aaattaatga attaaggctg  
119581 ctgtgctgag atcttgggca aattattcca ccacatggg atcagatagt gtaaaaaat  
119641 tgattctgat tgtttgcat gttttacagg aaccaccagc tggtttgag agtgcctgtt  
119701 gtgtgttggg ttatagacct ggacatgatc ctggtgtaaa aatccacttt taacaaact  
119761 ggcatacata acaaatttta cttaaagata ctgtaactcc acaccaggca ctcacagaca  
119821 ccaatggctc ttaaccttg tgctatcca ggcctttta cattgggagt ggggtcatct  
119881 ggacccact agactatag ctgaaccttt ttttttcaa tgatttgtga tttctactg  
119941 tgtccatgga tccatgaaa tccacttcac ctttatccac ctttgtcatg gtggggagaa  
120001 cacatcaatg gtcactctga ccccatagga tagcacaagg gttatagggt ttatttgggt  
120061 tctcaaatga cctttacaga tactttacag tgtactatag taattaaaca tccaaaagag  
120121 aatgcctaaa tgcagatgga agttcaata cattttttca tgtctgcat gtttaaggct

120181 agattcaaac ctggactagt tccagagtcg acccaggagc tgtccgaggt gctgaccatc  
120241 agcatggaac atgactgatt tacaggagct ttccatgcat tccttcatca tttactcca  
120301 tatgtctgc tttaaagtga gtcaactgta gtgtttttgt gtattttttg tttgattag  
120361 aaatactct tgggatgctt tagatcttct ttgtttgctt aaggaatcg atgcagtgg  
120421 attacagtgc cataaaactg ggagaatggc gcctaaatcc aacactgtat attctcacat  
120481 ttttgtcatt ttagtcaatg aaaatctcag tgatgcttga tatcatgaaa ccacaaagct  
120541 tggagtcatt tttctctctg tttgattggt gttagttttt acaggacact ggcaacggga  
120601 aaagatgaaa actgaagatg tttttctctg gggagatgcc accgggctac tgcggccact  
120661 tttacaacca aatgagatgt taacaacgtg tctgtattaa gtgagttaat cgtggtttg  
120721 tgtttgtaac ctcatcagtc agagtggaaa ctgccagtaa ataaaacaga agaagacatt  
120781 tacatgtgtg ctacagatca gtcagaccag ccatgcggcc gaattgacat atgtgcata  
120841 ctgtgtgggc cgactttgct gatcctgtaa aatgattgtg caattctgat ccactacaa  
120901 aacctctgac tgtacagaaa cacgctctct gaatatgaaa caacaaaaaa atctaaattg  
120961 aatgatggc agaaaataac acatcttaat cttaattta aaagtttca cagtaagta  
121021 taattaaact gtgcattatt ttatgtcatt gctacctag agacagtatt aattcttgyg  
121081 taattaaat taaatcacac aaaatcaacc ataatccaag gaataatttt gaaatgttgc  
121141 atcagaatt caaaaaaaan nnnnnnnnnn nnnnnnnnnn nnnnnnnnnn nnnnnnnnnn  
121201 nnnnnnnnnn nnnnnnnnnn nnnnnnnnnn nnnnnnnnnn nnnnnnnnnn nnnnnnnnnn  
121261 nnnnnnnnnn nnnnnnnnnn nnnnnnnnnn nnnnnnnnnn nnnnnnnnnn nnnnnnnnnn  
121321 nnnnnnnnnn nnnnnnnnnn nnnnnnnnnn nnnnnnnnnn nnnnnnnnnn nnnnnnnnnn  
121381 nnnnnnnnnn nnnnnnnnnn nnnnnnnnnn nnnnnnnnnn nnnnnnnnnn nnnnnnnnnn  
121441 nnnnnnnnnn nnnnnnnnnn nnnnnnnnnn nnnnnnnnnn nnnnnnnnnn nnnnnnnnnn  
121501 nnnnnnnnnn nnnnnnnnnn nnnnnnnnnn nnnnnnnnnn nnnnnnnnnn nnnnnnnnnn  
121561 nnnnnnnnnn nnnnnnnnnn nnnnnnnnnn nnnnnnnnnn nnnnnnnnnn nnnnnnnnnn  
121621 nnnnnnnnnn nnnnnnnnnn nnnnnnnnnn nnnnnnnnnn nnnnnnnnnn nnnnnnnnnn  
121681 nnnnnnnnnn nnnnnnnnnn nnnnnnnnnn nnnnnnnnnn nnnnnnnnnn nnnnnnnnnn  
121741 nnnnnnnnnn nnnnnnnnnn nnnnnnnnnn nnnnnnnnnn nnnnnnnnnn nnnnnnnnnn  
121801 nnnnnnnnnn nnnnnnnnnn nnnnnnnnnn nnnnnnnnnn nnnnnnnnnn nnnnnnnnnn  
121861 nnnnnnnnnn nnnnnnnnnn nnnnnnnnnn nnnnnnnnnn nnnnnnnnnn nnnnnnnnnn  
121921 nnnnnnnnnn nnnnnnnnnn nnnnnnnnnn nnnnnnnnnn nnnnnnnnnn nnnnnnnnnn  
121981 nnnnnnnnnn nnnnnnnnnn nnnnnnnnnn nnnnnnnnnn nnnnnnnnnn nnnnnnnnnn  
122041 nnnnnnnnnn nnnnnnnnnn nnnnnnnnnn nnnnnnnnnn nnnnnnnnnn nnnnnnnnnn  
122101 nnnnnnnnnn nnnnnnnnnn nnnnnnnnnn nnnnnnnnnn nnnnnnnnnn nnnnnnnnnn  
122161 nnnnnnnnnn nnnnnnnnnn nnnnnnnnnn nnnnnnnnnn nnnnnnnnnn nnnnnnnnnn  
122221 nnnnnnnnnn nnnnnnnnnn nnnnnnnnnn nnnnnnnnnn nnnnnnnnnn nnnnnnnnnn  
122281 nnnnnnnnnn nnnnnnnnnn nnnnnnnnnn nnnnnnnnnn nnnnnnnnnn nnnnnnnnnn  
122341 nnnnnnnnnn nnnnnnnnnn nnnnnnnnnn nnnnnnnnnn nnnnnnnnnn nnnnnnnnnn  
122401 nnnnnnnnnn nnnnnnnnnn nnnnnnnnnn nnnnnnnnnn nnnnnnnnnn nnnnnnnnnn  
122461 nnnnnnnnnn nnnnnnnnnn nnnnnnnnnn nnnnnnnnnn nnnnnnnnnn nnnnnnnnnn  
122521 nnnnnnnnnn nnnnnnnnnn nnnnnnnnnn nnnnnnnnnn nnnnnnnnnn nnnnnnnnnn  
122581 nnnnnnnnnn nnnnnnnnnn nnnnnnnnnn nnnnnnnnnn nnnnnnnnnn nnnnnnnnnn  
122641 nnnnnnnnnn nnnnnnnnnn nnnnnnnnnn nnnnnnnnnn nnnnnnnnnn nnnnnnnnnn  
122701 nnnnnnnnnn nnnnnnnnnn nnnnnnnnnn nnnnnnnnnn nnnnnnnnnn nnnnnnnnnn  
122761 nnnnnnnnnn nnnnnnnnnn nnnnnnnnnn nnnnnnnnnn nnnnnnnnnn nnnnnnnnnn  
122821 nnnnnnnnnn nnnnnnnnnn nnnnnnnnnn nnnnnnnnnn nnnnnnnnnn nnnnnnnnnn  
122881 nnnnnnnnnn nnnnnnnnnn nnnnnnnnnn nnnnnnnnnn nnnnnnnnnn nnnnnnnnnn  
122941 nnnnnnnnnn nnnnnnnnnn nnnnnnnnnn nnnnnnnnnn nnnnnnnnnn nnnnnnnnnn  
123001 nnnnnnnnnn nnnnnnnnnn nnnnnnnnnn nnnnnnnnnn nnnnnnnnnn nnnnnnnnnn  
123061 nnnnnnnnnn nnnnnnnnnn nnnnnnnnnn nnnnnnnnnn nnnnnnnnnn nnnnnnnnnn  
123121 nnnnnnnnnn nnnnnnnnnn nnnnnnnnnn nnnnnnnnnn nnnnnnnnnn nnnnnnnnnn  
123181 nnnnnnnnnn nnnnnnnnnn nnnnnnnnnn nnnnnnnnnn nnnnnnnnnn nnnnnnnnnn  
123241 nnnnnnnnnn nnnnnnnnnn nnnnnnnnnn nnnnnnnnnn nnnnnnnnnn nnnnnnnnnn  
123301 nnnnnnnnnn nnnnnnnnnn nnnnnnnnnn nnnnnnnnnn nnnnnnnnnn nnnnnnnnnn  
123361 nnnnnnnnnn nnnnnnnnnn nnnnnnnnnn nnnnnnnnnn nnnnnnnnnn nnnnnnnnnn  
123421 nnnnnnnnnn nnnnnnnnnn nnnnnnnnnn nnnnnnnnnn nnnnnnnnnn nnnnnnnnnn  
123481 nnnnnnnnnn nnnnnnnnnn nnnnnnnnnn nnnnnnnnnn nnnnnnnnnn nnnnnnnnnn  
123541 nnnnnnnnnn nnnnnnnnnn nnnnnnnnnn nnnnnnnnnn nnnnnnnnnn nnnnnnnnnn  
123601 nnnnnnnnnn nnnnnnnnnn nnnnnnnnnn nnnnnnnnnn nnnnnnnnnn nnnnnnnnnn  
123661 nnnnnnnnnn nnnnnnnnnn nnnnnnnnnn nnnnnnnnnn nnnnnnnnnn nnnnnnnnnn  
123721 nnnnnnnnnn nnnnnnnnnn nnnnnnnnnn nnnnnnnnnn nnnnnnnnnn nnnnnnnnnn  
123781 nnnnnnnnnn nnnnnnnnnn nnnnnnnnnn nnnnnnnnnn nnnnnnnnnn nnnnnnnnnn  
123841 nnnnnnnnnn nnnnnnnnnn nnnnnnnnnn nnnnnnnnnn nnnnnnnnnn nnnnnnnnnn  
123901 nnnnnnnnnn nnnnnnnnnn nnnnnnnnnn nnnnnnnnnn nnnnnnnnnn nnnnnnnnnn  
123961 nnnnnnnnnn nnnnnnnnnn nnnnnnnnnn nnnnnnnnnn nnnnnnnnnn nnnnnnnnnn  
124021 nnnnnnnnnn nnnnnnnnnn nnnnnnnnnn nnnnnnnnnn nnnnnnnnnn nnnnnnnnnn  
124081 nnnnnnnnnn nnnnnnnnnn nnnnnnnnnn nnnnnnnnnn nnnnnnnnnn nnnnnnnnnn  
124141 nnnnnnnnnn nnnnnnnnnn nnnnnnnnnn nnnnnnnnnn nnnnnnnnnn nnnnnnnnnn  
124201 nnnnnnnnnn nnnnnnnnnn nnnnnnnnnn nnnnnnnnnn nnnnnnnnnn nnnnnnnnnn











































197701 nnnnnnnnnn nnnnnnnnnn nnnnnnnnnn nnnnnnnnnn nnnnnnnnnn nnnnnnnnnn  
197761 nnnnnnnnnn nnnnnnnnnn nnnnnnnnnn nnnnnnnnnn nnnnnnnnnn nnnnnnnnnn  
197821 nnnnnnnnnn nnnnnnnnnn nnnnnnnnnn nnnnnnnnnn nnnnnnnnnn nnnnnnnnnn  
197881 nnnnnnnnnn nnnnnnnnnn nnnnnnnnnn nnnnnnnnnn nnnnnnnnnn nnnnnnnnnn  
197941 nnnnnnnnnn nnnnnnnnnn nnnnnnnnnn nnnnnnnnnn nnnnnnnnnn nnnnnnnnnn  
198001 nnnnnnnnnn nnnnnnnnnn nnnnnnnnnn nnnnnnnnnn nnnnnnnnnn nnnnnnnnnn  
198061 nnnnnnnnnn nnnnnnnnnn nnnnnnnnnn nnnnnnnnnn nnnnnnnnnn nnnnnnnnnn  
198121 nnnnnnnnnn nnnnnnnnnn nnnnnnnnnn nnnnnnnnnn nnnnnnnnnn nnnnnnnnnn  
198181 nnnnnnnnnn nnnnnnnnnn nnnnnnnnnn nnnnnnnnnn nnnnnnnnnn nnnnnnnnnn  
198241 nnnnnnnnnn nnnnnnnnnn nnnnnnnnnn nnnnnnnnnn nnnnnnnnnn nnnnnnnnnn  
198301 nnnnnnnnnn nnnnnnnnnn nnnnnnnnnn nnnnnnnnnn nnnnnnnnnn nnnnnnnnnn  
198361 nnnnnnnnnn nnnnnnnnnn nnnnnnnnnn nnnnnnnnnn nnnnnnnnnn nnnnnnnnnn  
198421 nnnnnnnnnn nnnnnnnnnn nnnnnnnnnn nnnnnnnnnn nnnnnnnnnn nnnnnnnnnn  
198481 nnnnnnnnnn nnnnnnnnnn nnnnnnnnnn nnnnnnnnnn nnnnnnnnnn nnnnnnnnnn  
198541 nnnnnnnnnn nnnnnnnnnn nnnnnnnnnn nnnnnnnnnn nnnnnnnnnn nnnnnnnnnn  
198601 nnnnnnnnnn nnnnnnnnnn nnnnnnnnnn nnnnnnnnnn nnnnnnnnnn nnnnnnnnnn  
198661 nnnnnnnnnn nnnnnnnnnn nnnnnnnnnn nnnnnnnnnn nnnnnnnnnn nnnnnnnnnn  
198721 nnnnnnnnnn nnnnnnnnnn nnnnnnnnnn nnnnnnnnnn nnnnnnnnnn nnnnnnnnnn  
198781 nnnnnnnnnn nnnnnnnnnn nnnnnnnnnn nnnnnnnnnn nnnnnnnnnn nnnnnnnnnn  
198841 nnnnnnnnnn nnnnnnnnnn nnnnnnnnnn nnnnnnnnnn nnnnnnnnnn nnnnnnnnnn  
198901 nnnnnnnnnn nnnnnnnnnn nnnnnnnnnn nnnnnnnnnn nnnnnnnnnn nnnnnnnnnn  
198961 nnnnnnnnnn nnnnnnnnnn nnnnnnnnnn nnnnnnnnnn nnnnnnnnnn nnnnnnnnnn  
199021 nnnnnnnnnn nnnnnnnnnn nnnnnnnnnn nnnnnnnnnn nnnnnnnnnn nnnnnnnnnn  
199081 nnnnnnnnnn nnnnnnnnnn nnnnnnnnnn nnnnnnnnnn nnnnnnnnnn nnnnnnnnnn  
199141 nnnnnnnnnn nnnnnnnnnn nnnnnnnnnn nnnnnnnnnn nnnnnnnnnn nnnnnnnnnn  
199201 nnnnnnnnnn nnnnnnnnnn nnnnnnnnnn nnnnnnnnnn nnnnnnnnnn nnnnnnnnnn  
199261 nnnnnnnnnn nnnnnnnnnn nnnnnnnnnn nnnnnnnnnn nnnnnnnnnn nnnnnnnnnn  
199321 nnnnnnnnnn nnnnnnnnnn nnnnnnnnnn nnnnnnnnnn nnnnnnnnnn nnnnnnnnnn  
199381 nnnnnnnnnn nnnnnnnnnn nnnnnnnnnn nnnnnnnnnn nnnnnnnnnn nnnnnnnnnn  
199441 nnnnnnnnnn nnnnnnnnnn nnnnnnnnnn nnnnnnnnnn nnnnnnnnnn nnnnnnnnnn  
199501 nnnnnnnnnn nnnnnnnnnn nnnnnnnnnn nnnnnnnnnn nnnnnnnnnn nnnnnnnnnn  
199561 nnnnnnnnnn nnnnnnnnnn nnnnnnnnnn cttccaggtt acagcatctg ggttcgtcta  
199621 gtgtttggac catgacacat gtaagcgcca accttttaaa aaattgacta tgaagaagaa  
199681 atcaataaca gtgatttcta aggggtgttg aaaaaatcgt ttcggcgata tatcgcgaca  
199741 gttcatttgg cgattcttct atcaattcaa aatgctgtca caatgatatt tattgaatta  
199801 tttctcagtg tccctcagtg tctgactctt gttttccact tcaacctccg acccgtagtt  
199861 ggcagcagtg aacacggagc ctctttgagc agctctactc tgcacaaaac aacaggaaga  
199921 cctcagctag aggcagcttt tttcgttgtc atgagacatg aactactctg tttttacttg  
199981 ggatgggtac cgaactgaaa ctctgtgcca agtttctgcc agcaacatgt aaaaaacggg  
200041 ggcttttttag tggactcaga taaaaacggg ggaaacactg cagctgcaca gcggttagtc  
200101 taatgcactt acttagcatc ggctaaaaatg ctatcggcaa agcggggtca aaattctggt  
200161 gaacgtccta gcaaaaagatt ctagtctcgt gaccagattg atcagaggga tgtgcacaac  
200221 gctctgaaaa aaggagaacg ttgtggctac gacagtttta cttccgtgtg tgtgagaaag  
200281 cgtggctgca gcagtgcaga ttgatattgc gtacagtaca caaagcatct tactttgcca  
200341 ctttaaagtg tctccttcat cctgtcatgc tgcacatca tcacacttct ttgtttctgc  
200401 aaagaattag tgttttattt cccctttat ctttgaaata ccattcaggc tcccgtttca  
200461 agctccggtt aaaagtagt gagaagctac atttaacaaa attgaaaaga aacagcgttt  
200521 tattaacaca catgccatga gtatacgtgg cttgagacag ctgtgtctct acctgatctg  
200581 tttctgaaat cgggtacctg caggtacaaa ccgtacatca cttcctcttg accccaacat  
200641 tgtaataggt aagtttttca aattagtttg gctccctgta gcatttttca gacagctttg  
200701 tctccttttt gaatgtccga gccatttaaa caacagatca ctccatattg acacaaaattt  
200761 atgatttctt aaacagagag cttcccctga ctggattaca gcgccataaa actgggaaaa  
200821 tggcgctaaa tgcaacactg tatattctca tattgttgtc tttgcagtca atgaaaatct  
200881 tagtgatgca tgatatcatg aaaaccacaa agcttggagt cattcttctc tctgttagat  
200941 tgtttttagt ttttacagga cactggcaac gggaaaagag gaaaattgag aacatttttc  
201001 tcttaggaga tgctcccnnn nnnnnnaaa gtattatatt atttaagctg ttaggaagac  
201061 agatccaaca gatgtgttat aagatttctg agtgttcag agtctgtgga caggctcaac  
201121 ccttgagact cactgactcc tttcaaagta gaatataaag cttttatgaa ttcactggtt  
201181 gatttaaact catctttaac cccctcacac ctgaatttat atttccaaat aaataacaa  
201241 atattgtctt taatgttttt tacattcaag gtgatgttta tgattttgtg gaagattatc  
201301 tggttacagt cactagtcac tttagaaaaa caaattagaa aataaagtct aatacctac  
201361 aaagtaataa ttaaacttta accaagacaa aagtactttt gttcatgtac cctggatgga  
201421 tgacttttga gcagaaaagt tttataagtg gtcattcaga cttggtttat cttatgtgtg  
201481 acacatttct ggtcaacatg tctacactta aaaaatcagt tcagaaaact tttctaaaa  
201541 aactttgtgc taagccgaaa gttatcaaat tatttaaatg aaattaatga attaaggctg  
201601 ctgtgctgag atcttgggca aattattcca ccacaatggg atcagatagt gtaaaaatat  
201661 tgattctgat tgtttgcat gttttacagg aaccaccagc tggtttgag agtgcgttt  
201721 gtgtgttggaa ttatagacct ggacatgatc ctgggtgtaa aatccacttt taacaaaact

201781 ggcatacata acaaatttaa cttaaagata ctgtaactcc acaccaggca ctcacagaca  
201841 ccaatggctc ttaacccttg tgctatccca ggccctttaa cattgggagt ggggtcatct  
201901 ggaccccact agactatacg ctgaaccttt ttttttntnn nnnnnncatg ttccctgttg  
201961 agtcagtggt tagagacctt ttgcatcagc agctccatgc tccagtctc  
202021 tgggagactt tatagtcctg agagttgaag actggatgac tgacagctgc ccttcacac  
202081 agcagaagac acagaaatcc tcatcctcat catccaaaac atgacagtga tctgctcct  
202141 catctggact ctctctgct gctgcttcac aggtaaagtc cagagaatcc aactcctctc  
202201 ctctatgaac atccgtccct ctgaaatgaa ggccacaaaa gcatgaagct gctttctgtt  
202261 tctgtctctg tatcctcaga gtccagagga caggtcacag tgactcagcc tggaccagtg  
202321 agctctgctg tgggaggatc tgtctccatc tcatgtagaa ccagtcagga tgtttataac  
202381 aacaataatt tagcctggta ccaccagaaa gatggagaaa ctcctaaact cctgtttat  
202441 tatgttggaa gcagagtatc agggactcca gctcgtttta cagacggtg g atcaaactct  
202501 gatttctactc tgaccatcag tgggaattcag gctgaagatg cagcagttta ttactgtcag  
202561 atttttcatg tcatcaacag tcagtatgtg ttcacacagt gaaaaacagt cgtacaaaa  
202621 cctccctcat gctggctgaa cagaaactga actgactgct gcagctggaa gatgctgag  
202681 acactgaaac agttcactga acatccattc taacaatcac aaactcagc aatagtcacc  
202741 ttatgttacc agatataaga acttgctcct gtttatgcag cctgataata atggaactt  
202801 ctttaattaa tatataaatt accaatataat attttatctt ttgtaaaaac aaaaacta  
202861 aaaaaacgga ttcttcttct taagaagtac aatcaaaaag tgtgatataa ttaagctgt  
202921 taggaagaca gatccaacag atgtgttata agatttcgga gtgttcatga gtctgtggac  
202981 aggctcaacc cttgagactc actgactcct tccaagtag aatataaagc ttttatgaa  
203041 tcaactggtt atttaaactc atctttaacc ccctcacacc tgaatttata tttccaaata  
203101 aataaaciaa tattgtcttt aatgtttttt acattcaagg tgatgtttat gattttgtg  
203161 aagattatct ggttacagtc actgactcatt ttagaaaaac aaattagaaa ataaagtcta  
203221 ataccttaca aagtaatat taaatcttaa ccaagacaaa agtacttttg ttcatgtacc  
203281 ctggatggat gactttgtag cagaaaagtt ttataagtgg tcattcagac ttggtttatc  
203341 ttatgttgta cacatttctg gtcaacatgt ctacacttaa aaaatacgtt cagaaacctt  
203401 tttctaaaaa actttgtgct aagccgaaag ttatcaaat atttaaatga aattaatgaa  
203461 ttaaggctgc tgtgctgaga tcttgggcaa attattccac cacaatggga tcagatagtg  
203521 taanaatatt gattctgatt gtttgccatg ttttacagga accaccagt ggtttgcaga  
203581 gtgctgttgg tgtgttggat tatagactg gatcatgacc tgggtgtaaaa atccactttt  
203641 aaacaaactg gcatacataa caaatttaac ttaaagatac tgtaactcca caccaggcac  
203701 tcacagacac caatggctct taacccttgt gctatcccag gccctttaa attaggagt  
203761 gggtcactct gacccacta gactatacgc tgaaccttt tttccatgg atcacatgaa  
203821 atccacttca cctttatcca cctttgtcat ggtggggaga acacatcaat ggtcatcttg  
203881 accccatagg atagcacaag ggttataggg tttatttggg ttctcaaat acctttacag  
203941 atactttaca gtgtactata gtaattaaac atccaaaaga gaatgcctaa atcagatgg  
204001 aagttcaaat acatttttct atgtccacca tgtttaaggt cagattcaaa cctggactgt  
204061 ttccagagtc gaccaggag ctgtccgagg tgctgaccat cagcatggaa catgactgat  
204121 ttacaggagc tttccatgca ttccttcac atttaactcc atatgtgctg ctttaagtga  
204181 agtcaactgt agtgtttttg tgtattttt gtttgaatta gaaatactc ttgggatgct  
204241 ttagatctct tttgtttgct taaggaatca tcttctttc ctggatcacc tgtaaggaca  
204301 aatcatctaa aatcagtgac tttaaagtag tggaaactgat ttaagagag aacctattt  
204361 tctacatggt gttatttttg ccaattaaat gactgactaa tagttattta tatctcaata  
204421 taagtctatg gaattttagt gttttggagc cagtgggtac ttctgtttg agagatgagg  
204481 gggagggggt cattcagtc agttctcata tacagtctat ggttctacat gtccacacta  
204541 acgttattac cacactctca gctacaaaag cagaagttta cattctaaca ttttaatgty  
204601 tacaattctt aagaaaatca acataagatt acattcattg actgatatgag agaaatcttt  
204661 gtcttttaca tccataatat ttagttttaa gaaccattga ctgtatatga ctctaccagc  
204721 tcagtggcct tgtggtagag tgtccacca gcaggtaaca accgtacatc acttctctt  
204781 gtcgccaaca ttgtgaaagg taagttattt gaattagttt ggctccctgt agcatttcca  
204841 tacagttttg tctcattttt gaccgtctga gccattttaa caacagatac ctccatattg  
204901 acacaaatgt atgatttct caacaacaga gagcttccc cgactggatt acagcgccat  
204961 aagactggga gaatggcgcc taatccaac actgtatatt ctcacattt tgtcatttta  
205021 gtcaatgaaa atctcagtgat tgccttcata catgaaacca caaagcttg agtcattttt  
205081 ctctctgctt gattgtgtt agtttttaca ggacacnnnn nnnnnngaac ggattagatc  
205141 tcttcacatc acatttaca gtggctcatal ttgtaaaatg ttctaagcta tttcattatc  
205201 atttgattac acaaatatac aattattaaa taaacaggca atgaaaatcc ctgctaatta  
205261 ttttaattaaa aatatacttt caggttattt taaaacataa tgatagttag gatgatcctt  
205321 gttcctgttg gaatcagtg tagcatttcc atagagacac tttgcatcag cagctccatg  
205381 ctccagtgct ctgggagact ttatagtcct cagagttgaa gactggatga ctgacagctg  
205441 tcttctcatca cagcagaaga cacaaaaatc ctcatcctca tccaatcat gactgtgatc  
205501 tgcgtctctc tctggactt cctctgctgc tgcttcacag gtaaagtcca gagaatcca  
205561 ctctctctca ctacctcct cactctggct gaacagaaac tgaactgact tgaactgctg  
205621 gaagatgctg cagacactga aacagttcac tgaacatcca ttctaacaaa cacacaaaca  
205681 caatagacac ctcatgttac aagatttgtt cctaattttc atcagtagtc ttatagaacc  
205741 agtttaagcg aaataatatt gttaaatctg ccatatattt attgatcaca tgtaaatgty  
205801 ttcatatttt gaaaaaaaaa agtgaactt tattcaatca gcagcacaaa aagatacatt

205861 tgatTTTTTT gggTTTTTga aagattagaa aatcaaacaa caaactgctt aataagtgca  
205921 attcaaaagc acacttcttt ttgTTTTTggt aaggatttac attttcagtc catatTTTTT  
205981 gcagaacatt aaagaataat tttcattatt attcattgtc tccaataaaa tatgatgttg  
206041 cttctgtcac aaaagagagt catggaagaa tcagttggca aaagctcttt tTatTgTcag  
206101 aaacatTTTT ctaaagaaac tgtaacaagt caaaagagtt taagaaaaat aatgTaaag  
206161 aaaaactgca tggaaaacag atttatagtc atagttccag ttcaggactg ggagcactgg  
206221 tctctcctga aagtctctat gactggatcc ttggatcctc tcttggcctg acaggtcacc  
206281 ttctcccact ggtctgcaga gagcctcagg gtgctgctcc agctgtagag gccgtccttc  
206341 tgcagcacc cggggctcct gctctcctcc cagctgctgc tgctgccgac cacctcccag  
206401 gacagagtc agtctgaggg gaagcccttg ttggccacac acatgagtg ggcttcccc  
206461 tgatgcaat ccttcgtgga gggggcagc actgtcagca agggcgaggt atcacctagg  
206521 agacaccaat cagcttaaag gacaggaacc acacagctgt caataaaaag ttcacatttg  
206581 atgcagtggt ttcagtttga agaaggtttg tggttcaggt tttttctgct ccatcagtca  
206641 ttgattcaca cattgtttca cttccttgaa gaaatctctc atgcagatca gcaacaagac  
206701 aaacttcagt ttctactgaa aaatgtcaaa ctgggtttga aaaagagcag atgcatcttt  
206761 atgaagaaaa caagtttggga ctgaatgttt ttaaaaagct tcatcataca ttaaagaaat  
206821 ttacaaacta tgtttaaaac acaacaatca tgtcagtttt ctgtcagaaa atcctttgta  
206881 ataacaatta aatattctga aatattcagat gtccaaacat tcgtccagaa agaaaaaaat  
206941 gtgagtaaaa acttcctttt aaaaaaacta tgaccacatt aacatacttt ttatTTaaac  
207001 acacaatggt tatagcacat tttgcgataa aatacaaaata tgttttaagt ttaaactctt  
207061 tgattaaaaa tcagttcagt ttttaattgat aaaaactgaa actgaaccaa aatgTttcct  
207121 caggtaatat ttaaaccattt attccagctc ggTtcttcca ctaaaatttc tccactgtga  
207181 cacaaaactga ctaatgtggt ttacaaaaac ctctgactgt acagagattt tctctccagc  
207241 tgtttcaatt taaataaatt atttcaaaat tcttgattca catagaaaat atgattttat  
207301 ttaaattaag gacacacaat tttatatttt caagtttcac ataaactaag tcttcttata  
207361 aaaacaatta atttaccaa aataatctaa tgtcattttt tacagtaatt tactagtaac  
207421 tcagaatcaa tgaagaaag aaataagaca caaatacaga aaaagcaaca aaaagatcta  
207481 cttacttcca acatccagtc tggttcctcc accaaaactg agccacagtg atacaaaactg  
207541 attgaagcgt cgtacaaaaa cctctgactg tacagagaca cgctctctga ctatgaaaca  
207601 aacaactca actgaaatga tggcagtaaa tctaaaaata atacatttt tTgtcagct  
207661 gtaaaattgta tttattgtt agttgtaatt aaactgtgta taatttttaa accattcaaa  
207721 taaatcacia agttgtaaat ataatcacat taaagaacaa ccagaaaatt tgattaaaag  
207781 attgaaagct gctcaaaca aaactacaaa caatataatca ttttgattaa ttgtgctaaa  
207841 ttgcatgatt aactatgTta taaaactagt aaaattatga aagaatccag tattaatac  
207901 tctgtttaag agaaaaaaaa ctttatagtt attttgcttt ctTgcattta tattcatac  
207961 tttatgTtt ctttcaatta tttgattttt gggggagttt ttctgtcctg ctgtttccta  
208021 caaactgtca tgtttttcca cattatgata aatggagTga ttagtTatt tgtttggatt  
208081 atttttgcac tctaggcttc atgctgcatc ttcaaataaa ttaaattgca cttaattttg  
208141 gttacgtgTt gtacagattc ctagataaat aaaaataaaa tgtttgtgtg tttattttgTg  
208201 tagaataatg tgagTgtgca ggaatcctca tgacatgtgg agaactgcag cttctgactg  
208261 attcagTgtg tttgcatatg tgtgctgctc ctctgcttcc agcagTtaaa gctcagTgtt  
208321 gatcagTggc cgtccagacc tttcagagac actgactcgc ccgcagcaca atgatgatgt  
208381 cactgactct gctgctcttc accctggaac tctctgttca gggTgagact gctctctgga  
208441 agctttgctt caagcagcaa ccaggTtctc cacaaTgatg ttctgctatg atggagaaac  
208501 actgaaacta gcagcactga gcttctctct ctggatgtga aagaaatgat cctctctgt  
208561 ttggatgttg ataattttac tataagctgc ttttgtctca attattctac cttttctgt  
208621 tttcagcttc atcagaagaa atcctcctca ctcagactcc tggagctcag tctgtTgtg  
208681 aaggacagac tgtctccatc agatgTaaat ccagcaaact cattggtgat gacattaact  
208741 ggtatcttca gaaacctgga gaagctccta aactcctgat atatgatact acagaactgc  
208801 agtctggtgt tccagatcgt ttcagagcaa ctgcagttca gactgattc actctgacca  
208861 tcagcagagt tcagcctgaa gattcaggag tttattactg ttcagcagat aacagcttcc  
208921 cgttcacaca gtgaaacaat gtctacaaa atcctcaaag ctgcagagga actgatctac  
208981 ggctgtactg aagcagagga tttacagaca aacaccacct cagattagac ctgaatttta  
209041 gatttctgTt tttagatgta ataattattt tactcattat taaaccaggg gTaaaacaat  
209101 ttatgcaaaa cagtcttcat tgaactcaca aacactcata aaaaatttaa tctctgaaat  
209161 gtattattga atgattttaa aactagtagt tcaggTtcaa ctgttattct gctgcatcaa  
209221 gctgtcattt gttgtcagtt aaccacaaa aatgaactga aactgatcat ttgacctctt  
209281 ttctgtcaaa aatatataca attgttcaaa tctcgcctc acttacctcc cttcaaaaaca  
209341 ttttagccaa ttttttaaaa gtttcttTgt gTcatgttga atttattttt atttgatgag  
209401 tcacaaacat tttctttgac ttctgtgtca tcaaacTtta caaaaacaaa cagcagTtca  
209461 tgaagTttc ctttattttac tgaatcttca gTcactgtga tctctgtgtg atccccataa  
209521 agtttTgtgta gtccagactc tgaaccaaag cctttatgtg agTttttcat aactaacagt  
209581 aaatgtctct gatcataaat cttccctatt ttggaaccac ttcacagTtt ttgggTaaac  
209641 ccaactcctg tccactaaac gtattTgtga gccagacttt catgatgatt attcagTgtg  
209701 cctgatgtta tttttctatc aacagTtaaa tccattactg ctgaaagctg tctcaaatga  
209761 aaattatttc ttcttctgca gaattataaa ctgtttaaat agtagcttta cataactctga  
209821 agaaaacaaa tattcatttt attttattta gTttgtgtct tttgacactt cttctgtcta  
209881 gttctagatt tttttaatta attcattttta aacttatatt ctctgttttag ttgatttctt

209941 taaacggtca aaaaatctca aatgttacaa taaaaaatat taaaaattat ttttaattata  
210001 aagatgatcc atgttcctgt tggagtcagt ggtagcattt ccatagagac acttttgcac  
210061 agcagctcca tgctccagtg ctctgggaga cttttatagtc ctgagagttg aagactggat  
210121 gactgatcagc tgtccttcac cacagcagaa gcacacaaaa tcctcctcat cctcatcatc  
210181 caaaacatga ctgtgatctg cgtcctcatc tggactctcc tctgctgctg cttcacaggt  
210241 aaagtccaga gaatccaact cctcctcctc atgaacatcc gtccctctga aatgaaggcc  
210301 aaaaaagcat gaagctgctt tctgtttctg tctctgtatc ctcagagtc agaggacagg  
210361 tcacagtgac tcagcctgga gcagtgagct ctgctgtggg aggatctgtc tccatttcat  
210421 gtagaaccag tcagaatggt catggcaaca tccatttagc ctggtaccaaa cagaaagatg  
210481 gagaaactcc taaactactg ttctactatg ttggcagcag agtatcaggg actccagctc  
210541 gttttacaga cggtgatca aactctgatt tcactctgac catcagtgatc attcaggctg  
210601 aagatgcagc agtttattac tgtcagagtt ttcatgtcat caacagtcag tatgtgttca  
210661 cacagtgaac aacagtcgta caaaaacctc cctcattctg gctgaacaga aactgaactg  
210721 actgctgcag ctggaagatg ctgcagagac tgaacagtt caccgaacac taatatttgg  
210781 gtgccagtggt ctcagacggt tgagcagttg tccaatgatt gaagggctcg cagttcagtc  
210841 catgcaccct tcgggtcaaa tattgtatcc ttgggtatga tacttcaccc tccagtgatg  
210901 atgtgcatga atgtcccgtg gatggctcaa gtgaccgtag ccgcaactg gcagccactt  
210961 ctgtcagctc gccctagggc agttttggtt acatcagtag tttaccatca cccagtgatg  
211021 acaaggagtg aatgaataat ggacacaatg taagtgtctt agcatctgga aatgtgtgga  
211081 taaatccaat ccattattag tattattcta ataaacacac aaacacaata tacaccta  
211141 gaccagattt gttctcaatt ttttcagtag tctttaggaa acagtttaag acaataata  
211201 ttgtttaatt ctgtcaataa tttatataca agatatttgt gttttcatat tttgtaataa  
211261 aaaaagtgtc atttcattca atctacagca caaaaagatg catttgattt tgttttttga  
211321 aagattagaa aatgcaaaaa tacaatgttc tccagctta ttgtacacag gaatagtctt  
211381 tttccagata aatgaaaggg tttagtgtca gtttggctgc tgggtggagt ttgatgctga  
211441 gtgtttacaa cagtgaaga agcagatgat tgtcctgaca tcaactaaaa aggatccgtt  
211501 tatcttatga aactgtggaa tagaaatgtg tctagtttat ccgtttatgt ttatgtgtt  
211561 aaggaacaag tgggtccaag cttttgactg ctactgtatt tattgtttca ggtcaaaaata  
211621 gaaattctga aatcctcctg agtttaacaa acctcgtcct tctttgcaat tttttgcatt  
211681 tagttctctt taacaaactc tttaacctct tcaggctgtc tatcgtaat ttgcaactg  
211741 ccaatggaca aaacctaatt tagctattcc ttaaaaagtg gaatgaagtc aagcgtgatt  
211801 ttatgtgttt ttattcctca acatatttta ttacaattaa actacaagtt tgcctctgtc  
211861 tgtgttgggt attttgtttt tcgtttcata tttttgcaga agttgcactt atgacaaaag  
211921 caaaggaaaa tacattcttc accttaaaag gcaaaaaaca ccaaagaata atttttatat  
211981 aattgaaaaa aagtcaaatg tgaaggggtt gtcttttttt cctgtttcct atttatgtta  
212041 ttccttataa taaaaatacc aaattgcttc tgtcataaaa tagagtcag gaaagatc  
212101 agtcagtaaa aggtattttt atttgcgaat aatgtttcat acagaaactg taacaagtca  
212161 aaaagagttt aagaaagaga ataaaaaga aactgcatag aaaacagatt tatagtcata  
212221 gttccagttc aggactggga gcaactggtc ctctgaaag tctctaagac tggatccttg  
212281 gatcctctct tggcctgaca ggtcaccttc tcccactggt ctgcagagag cctcagggtg  
212341 ctgctccagc tgtagaggcc gtccttctgc agcaccctcg ggctcctgct ctcctccag  
212401 ctgctgctgc tgccgaccac ctcccaggac agagtcagct ctgaggggaa gcccttgttg  
212461 gccacacaca agagtgtggc cttcccctgc tgcagctcct tcgtggaggg ggacagcact  
212521 gtcagcaagg gcgaggcatc acctaggaga caccaatcag cttagaggagc aggatccaca  
212581 cagctgtcaa tcaaaaagct ctcatgggat gcagtggttt cagtttgaag aaggtttctg  
212641 ttcaggtgtt tttctgctcc atcagtcatt gattcacaca ttgtttcact tcttgaaga  
212701 aatctctcat gcagatcagc aacaagacaa acttcagttt ctactgaaaa atatcaaac  
212761 gggttacaaa aagagcagat gcatctttat gtgaaaaata attttggact taatgtcttt  
212821 aaaaagcttc atcatacatt aaagaaatgt aaaaattagg acaaatcat aacaatcatg  
212881 tcagttttct gtcagaaaat ctttttaaat acaattaaat attctgaaat atcaaatgct  
212941 gaaacattcg tccagaaaaga agattatgtg agtaaaaact gccttttaac accatgac  
213001 cacattaaca tatacttttt ttaaacacac aatgtttaaa gcacattttg taatcaata  
213061 caatattttt tttatttaca atttttcact gtattatcag ttcagtttta attgataaaa  
213121 actgaaactt tagcaaaatg tttcttcggg taatatttaa acatttatc cagctcgggt  
213181 cttccgcaa aagttaacca ctgtgataca tactgactaa tgtgttttac aaaaactgt  
213241 gactgtacag agattttctc tccaactggt tcaatttaa ctaattattt caaaactctt  
213301 gattcacata gaaattatga tttattttaa attaaggcaa aacaatttta tattttcaag  
213361 ttttacacaa actaagtctt cttataaaaa aacttttttc accaaaaaca attgaatgct  
213421 attttttaca gtaatttact agtaactcag aatcaatgaa agaaagaact aagacacaaa  
213481 tacagaaaaa gcaacaaaaa gatctactta cttccaaact ccagtcggt tccctccaca  
213541 aacgtgagcc acagtgatc aaactgattg aagcgtcgtc caaaaacctc tgactgtaca  
213601 gagacacgct ctctgactct gaaacaaaca aactcaactg aaataatgac agaaaacta  
213661 aaaataattc attttattgt ctcagtgtaa attgtactta gttgttgagt tgtaattaa  
213721 ctgtgtatcc atttctaacc ccttctaagc aatctcaag ttgtaaatat atcacatata  
213781 aagcacaacc agaaaatgtg attaaaagat tgaaaactgc ctcaacaaaa actacaaaa  
213841 tctatcattt tgactaatag taaaaaattg catgattaac tatgttataa aactagtaaa  
213901 agtatgaagg aaccagat taataactct gattaacaga aaacaacttt atagttattt  
213961 tgctttcttg catttagatt catatcttta tgttttcttt caattaattg ttttttttgg

214021 ggagtttttc tgtcctgctg ttctctgctt actgtcatgt ttttctccac atcatgataa  
214081 atggagggat tagttatttt gtttggatta tttttgact ctaggcttca tgctgcatct  
214141 tcaaataaaat tgaattgcac ttaatttttg ttacgtgttg tacagattcc tagataaata  
214201 aaaaataaac atttgagtgt ttatttgtgt agaataatgt gagtgtgcag gaatcccat  
214261 gacatgtgga gaactgcagc ttctgactga ttcagtgtgt ttgcatatgt gtgctgcctc  
214321 tctgcttcca gcagttaaag ctcaagtgtg atcagtggcc gtccagacct ttcagagaca  
214381 ctgactcgcc cgcagcacia tgatgatgtc actgactctg ctgctcttca ccctggagct  
214441 cctcgttcag ggtgagactg tcttctgaaa gctttgcttc aaccagcaac caggttctcc  
214501 acaatgatgt tctgctgtga tggagaaaaca ctgaaactag cagcactgag ctgctacttc  
214561 ttcaatttac ttcaagggtg ttttgtctca ataattcttc tttttctgt tttcagcttc  
214621 gtcagaaaaag ctccctactc agactcctgy agctcagtct gtagtccaag gacagactgt  
214681 ctccatcaga tgtaaagcca gttcaagtgt tggcacctgc cttaactggt accttcagaa  
214741 aaacggagaa tcccaaaaac tcttgattta ttatgctaca aaccgtcagt ctgggtgttc  
214801 aagtcacttc agtggagagt gatctggaac tgactttact ctgacagtca gtggaattga  
214861 acctgaacat gcaggagttt attactgtca gcagtgtaac agccttccgt tcacacagtg  
214921 aaaaacagtc gtacaaaaac gtgcttcagt caagctaaac tgaaactgaa ctgatgcagc  
214981 tcaactaaa cacaacaca cctggacttc ccaaagctc atataaata tatttactag  
215041 tgaagaaaa aattaaaaac tttccttaca aaccaaggct taatatttta tgtctgagag  
215101 aaatatgtaa aaaaaagcac aatatgacaa aataacaatt agatagttta tgcacaattt  
215161 tctaaataa acttacaatt ataaaactgt taatctctat gactcaacag agtcattctg  
215221 ttgctgcaaa ctgaaaagaa cagaaattga actcaactg attattttac cactttgttg  
215281 ttattttagt taatacagac attttaatta aactttcaaa gtattttcaa aaataaaagt  
215341 aatttttaaga aaacttaaa taatatcaa tttgttctct gtaaaaacat gttgatacat  
215401 taaaaaattt cgtgaacttt gtttttaagt aaagagattt tactttctgt tgggtttata  
215461 tttcaaacat aaaattctgt ttacttgacc aagttgacaa agttacactg atcatccctc  
215521 caaccaattc aacagtacat tgcagggctt cagtgattat gtaactgata atcaaaatat  
215581 taacattat tcagattctt ggtggagtca gtggtagcat ttccatagaa acactttgca  
215641 tcagcagctc catgctccag tgctctggga gactttatag tccctgagagt tgaagactgg  
215701 atgactgaca gctgtccttc atcacagca aagacacaga aatcctcttc ctctcatca  
215761 tcatcaaaa atgactgtga tctgcctctc catctggact ctctctgtc gctgctcac  
215821 aggtaaagt cagagaatcc aactcctctc ctctatgaac atccgtccct ctgaaatgaa  
215881 ggccacaaaa gcatgaagct gctttctgtt tctgtctctg tctcctcaga gtccagagga  
215941 caggtcacag tgactcagcc tggagcagtg agctctgctg tgggaggatc tgtctccatc  
216001 tcatgtagaa ccagtcagga tgtttatagc aacgaccgtt tagcctggtta ccaacagaaa  
216061 gatggagaaa ctccctaaact actaatttac tatgctagca ctcgagcatc agggactcca  
216121 aagtcgtttt acaggcagtg gatcaaaact tgatttact ctgaccatca gtggaattca  
216181 ggttaggat ggcagctttt attactgtca gagtgtcac tacatcaaca gtcagatgt  
216241 gttcacacag tgaaaaacag tctgacaaaa acctccctca ttctggctga acagaaactg  
216301 aactgactgc tgcagctgga agatgctgca gacactgaaa cagttcactg aacaacaaac  
216361 acacaaacc taaccccgat aataatgtca acctctgttt ttcatttaat aatcgcaaat  
216421 atagatttga tattttgtaa aaataaaaag attattctga ctaagaaaaca caatagaaca  
216481 ctgaaataaa ctgtgatgcc ataatttaaa ttgttatgat aacagaaaac aggctgtaca  
216541 agaagcagca catatgaaca tgcactgaaa gttgaaacca gttgaacttt gaccaatcag  
216601 ggttaggat ggcagctttt ctatttgta ggtcctttt caaaacatg gacgccaat  
216661 cttgaaaaat gactatgaag aagaaatcaa taacagtgat ttgtgttcgg ctggattaca  
216721 aagacaccaa gtctttaata tattggaatc gagctgtgaa agataaagcc tggaggaaga  
216781 ttccagagat ttgcatcact ttaacatttc acaccaagcc tcttccaatt gtgactacat  
216841 gcaactagat cttgcattag gacaacagat gaaatttaac tctgtgcta actctggcat  
216901 ttttatgttg atgcagcttc tgaaacattg tttaatatgc actgtcctaa ttcaataaaa  
216961 taatataata aataaataaa ataaataaaa atttcaggta gagagataac tgtgtgaaca  
217021 ccacatgcta aaagtgtgtt taagaatgca agtttcgac gttgataata ataataataa  
217081 tccattttat ttaaatgcct ttcatgaaac ccaaggacac ttcacaaaac aaaggttaaa  
217141 aatagacatt aaaagcacia taaatataaa agacaaattc aaaagtgaat cgggatggga  
217201 aggcaaaaat aaacagatga gttttgagt tctgatctgaa agttggaaga gagtctatgt  
217261 tacggagatc aggagggagg gaattccaga gtttgggagc cgagcagctg aaggctcggc  
217321 ttcctatagt gacgagctcg gccagaggaa cagagagctg aacagaggag gtggaccgaa  
217381 gagaacagc ggggttttg atattgtaga ggtcggagag ataaggaggg gccagttat  
217441 ggagggcctt aaagggtgaaa aggaggagt tgaattggat tctggaggtc atggggagcc  
217501 gagttcatct ggggtttggg tgttagggat tggaaatca cgtatatgtg aggaaagtgc  
217561 gtccacatta atatttttaa cattacgaaa ataaatgagg cgggagggag ggttcagtga  
217621 caaagtaatg gagatgttaa aagacacaag aaaatgatcg gttacatgaa tttcatcagt  
217681 agagcagtta gtgggggtta atccagagca gcaactaaa tccaaaatac atcctttaga  
217741 gtgagtagga gaaatgacat gctgggtgaa gtttaaggctg tccaaacatg agctcaagtc  
217801 tctagtgtgt ggaagaagc tattgtcaaa gtgaacattc atgttcatga atgcgacaca  
217861 catgctgtta gtgtacatgg cttagacag ctgtgtctct acctgatctg tttctgtaat  
217921 cggtagcctg caggcacaaa ccgtacatca ctctctagtc tagtcaccaa cattgtgata  
217981 ggtaagttat ttgaattagt ttggctccct gtagccttcc cagacagttt tgtctcctt  
218041 ttgactgtct gagccattta aacaacagat gcctccatat tgacacaaat gtatgatttc

218101 ctcaacaaca gagagcttcc cccgactgga ttacatcacc ataagactgg gagaatggcg  
218161 cctaaatgca ccactgtata ttctcatatt gttgtcattg cagtcaatga aaatctcagt  
218221 gatgcatgat atcatgaaaa ccacaaagct tggagccatt cttctctctg tttgattgtt  
218281 attagttatt acaggacact gacaatggga aaagaggaaa actgaggaga tgcctccggg  
218341 ctactgcagc cactttttaa taatcatcac ggtaagaatt cccaatgctc cctggtggag  
218401 tcagtggtaa tatttccata gagacacttt gcatcagcag ttccatgctc cagtgtctg  
218461 ggagatttta tagtcctgag agttgaagac tggatgactg acagctgtcc ttcacacag  
218521 cagaagacac tgaaatcctc ctcacatca tccaaatcat gactgtgac tgcgtcctca  
218581 tctggactct cctctgctgc tgcttcacag gtaaagtcca gagaatccaa ctcctctcct  
218641 ctatgaacat ccgtccctct gaaatgaagg ccacaaaagc atgaagctgc tttctgtttc  
218701 tgtctctgta tctcagagt ccagaggaca ggtcacagtg actcagctg gagcagtga  
218761 ctctgctgtg ggaggatctg tctccatctc atgtagaacc agtcagaatg tttatggcag  
218821 caactattta gcttgggtacc aacagaaaaga tggaaaatct cctaaactac taatttacct  
218881 ttctagcact cgagaaacag ggactccaac tcgttttaca ggcagtggat caaactctga  
218941 tttcactctg accatcagtg gaattcaggg tgaagatgca gcagtttatt actgtcagag  
219001 tgctcactac atcaacagtc agtatgtgtt cacacagtga aaaacagtgc taaaaaac  
219061 tccctcattc tgactgaaca aaaactgaac tgacagttca atgaagacac acacacacaa  
219121 atacaaacac aatcatgtgt gtttactttc caaattcttt gttataatc ctttttatt  
219181 tcttacagtt aatagaaatt attatgattc tgacttttga ttttaaacac agaacaacaa  
219241 taaaacagat gttttacatg gaaaacaaag aacagctcat gactgaatac attttgtttc  
219301 atttatataa gtacagttgt attaatttgc atcctcatca ccaaactgta agttttaacc  
219361 agatgatagc agaaaagtaa agttttttaa taaaaagatg taagaattgt actaaactga  
219421 tgctgggtatg aagttgattt ttgaatttaa atattaatgg aggataaaaa aaagatttta  
219481 acattttggg acagagaacc ccccccaaaa ccttttttac ccttttttac  
219541 ggaaaaaaaa gttaggggnn nnnnnnnntc aaaacactat taacacattt atactgaaaa  
219601 taagggttagg tgtgaaaaca atgattatct aaatgctaac aatttttaaa gatataattc  
219661 agatttttaca agtccagttt aaagtgtctc tgtaggagcc atgaattacg tgtgatcttt  
219721 cttgtggtga atgaatata atttgttttg attataggcc attgagtggtg taatcagctg  
219781 gtggccattg catgtcagaa cagcgcctc tgtggagtgt tttaaatccc gtcttaaac  
219841 gcatttttac tctctagctt ttaacaccgc atgattgtgt ggtcctctgt ttttttactg  
219901 tattttttatc tgtattttat tgtgttttat cttgttttta ttattttta cttttttat  
219961 atctgtgttt ttatcttgtt tttaccttgt ttttattttt atttaatttt ttatccattt  
220021 tactgggtgta ctttgtattt attttgtatg gcaatctttt gtctgggtgt tggctactgt  
220081 acagcacttt ggaaactgcg agtttgagaa atgtgctata taaataaagt ggattggatt  
220141 ggattggatt ggtgggtcac atgtttgttg gcggtgacat aaattgacta tgactcacct  
220201 gtggtttttt tccatgtgta agatggaagg gggggtgagc tgggttgagc tttttttt  
220261 ttgaccgttt tatacgtttt tctgcatttt tcttgattcc ttgtttttt ttgttttga  
220321 tcacaatata ataagtggat ttaattacct tcatttttca ttattaaaac ttcaaaatc  
220381 caactttgtt atgctttatg gttttttgag cgtgtcatta ttcaataccc ggaccagcg  
220441 tcagcctctc ggcgactgtt tggctacaat ttgtcaacaa aaaaaggcca ataaacacag  
220501 atattatgtg attgagcaac ggagctgaga tttggagtaa caaaaggagg attcagttac  
220561 acggacatcg gagaaactaa tggaggtagg agctggctgt caaacagtta aggaggagct  
220621 gctatcgaac tacagccagg taagaccacc tgttgatgtc cgcattggaag ctgtgccagt  
220681 ggaaagattg cagttcaaaa gtttgaagat tgggaacgat cgtctggctc gttggctgag  
220741 gaggttttagt tctgcgcaa acattccgat gctgagtgac tttttgctga gtgacgcaa  
220801 gtgaacttac ctcttgaact tgggtgggtg cggttttaa tcaggtgctc tctataacc  
220861 agaaattaca gttttcaggt tgggtcctgg ttatgaagtg gaactgccac tgcttttctt  
220921 tcaatttgac aaacaacaa agattaaatc cggcttaagc tcccgcatct cgtaatttat  
220981 tcaaagcaga ccgatacttg aatgttatta tgttgatgtt ctgtgacaac aaattaaaag  
221041 tcaactatca acagatgtac tttgcatgca ggcgtaagc acgctgaatc cagatggtt  
221101 gtcgcctttg tgattgtaaa attacaggaa agcacacca taaatgacac tttctttcaa  
221161 aggctatgtt cacaccgag gctgaaacga cttgatttca atttttttt tccctatgcg  
221221 acctgtatct gatcttttca tgacagtctg aacgacacag atcggatctt ttcaaagca  
221281 acccaggcaa cttgggtatg tggctcctgaa tccgatacgt atacgatctt ttcgaatgcg  
221341 accgctgtct gaccggccag gccacatgaa tccgaccctg acgtcattga tacgctacaa  
221401 acttcatagt tctgcattgt agtagtgga aacgaaaaca taaacatcaa ccatggctga  
221461 cgatgctgat gagaccagc agtggcaggg aagcgaagt caccatttga ttcattttg  
221521 ggggtgctcagc tctattcagg ccaactcca tgggttctat cgcaaccggg cggtttttga  
221581 aaaacatatt tccagcgaaa tggctgagcg tgggtgtgaa ccttccccac gattactttt  
221641 tttt

//
