# Supplementary material
Source: PubMed Central journal article supplement (PMC4106372)
Supplement: NIHMS608063-supplement-Supplementary_data_4.pdf [file NIHMS608063-supplement-Supplementary_data_4.pdf]

7-RSS

J9-3

C9-3

OLSP25C05

GACTGTGGTACACGTTTGGTGGAGGAACCAGACTGGAGTTTGGAAAGTGATGCCTCGCCCTTGCTGACAGTGCTGTCCCCCTCCACGAAGGAGCTGCAGCAGGGGAAGGCCACACTCATGT  
L W Y T F G G G T R L E F G S D A S P L L T V L S P S T K E L Q Q G K A T L M

C9-3

OLSP25C05

GTGTGGCCAACAAGGGCTTCCCCTCAGACTGGACTCTGTCCTGGGAGGTGGTCGGCAGCAGCAGCAGCTGGGAGGAGAGCAGGAGCCCCGGGGTGCTGCAGAAGGACGGCCTCTACA  
C V A N K G F P S D W T L S W E V V G S S S S S W E E S R S P G V L Q K D G L Y

C9-3

OLSP25C05

GCTGGAGCAGCACCCCTGAGGCTCTCTGCAGACCAGTGGGAGAAGGTGACCTGTCAGGCCAAGAGAGGATCCAAGGATCCAGTCTTAGAGACTTTCAGGAGAGACCAGTCTCCAGTCC  
S W S S T L R L S A D Q W E K V T C Q A K R G S K D P V L E T F R R D Q C S Q S

OLSP25C05

TGA\*ACTGGA\*ACTATGACTACAAATCTGTTTTCTATGCAGTTCTTCTTTTCCATTCTTTTTCTTAAACTCTTTTGACTTGTTACAGTTTTTGTGGGAAAAT
