# Supplementary material
Source: PubMed Central journal article supplement (PMC4106372)
Supplement: NIHMS608063-supplement-Supplementary_data_5.pdf [file NIHMS608063-supplement-Supplementary_data_5.pdf]

**Table:** Identification of VL, JL, CL segments in medaka ESTs coding for immunoglobulin light chain

| EST                      | LOCUS | VL           | JL          | CL          |
|--------------------------|-------|--------------|-------------|-------------|
| OLKI7B15                 | IGL2  | V4-2         | J3-2        | C3-2        |
| OLGI48J17                | IGL2  | V4-2         | J3-2        | C3-2        |
| OLSP40B17                | IGL2  | V4-2         | J4-2        | C4-2        |
| OLSP42K18                | IGL2  | V6b-2        | J5-2        | C5-2        |
| OLOVA49O21 <sup>^*</sup> | IGL2  | V3-2         | J9-2/J11b-2 | C9-2/C11-2  |
| OLKI56H12 <sup>^*</sup>  | IGL2  | V5-2         | J9-2/J11b-2 | C9-2/C11-2  |
| OLKI65E22 <sup>^*</sup>  | IGL2  | V6-2         | J9-2/J11b-2 | C9-2/C11-2  |
| OLSP61B14 <sup>*</sup>   | IGL2  | V8-2         | J9-2/J11b-2 | C9-2/C11-2  |
| OLKI20G22 <sup>*</sup>   | IGL2  | V10-2, V12-2 | J10-2/J12-2 | C10-2/C12-2 |
| OLKI35K02 <sup>*</sup>   | IGL2  | V10-2, V12-2 | J10-2/J12-2 | C10-2/C12-2 |
| OLKI23P18 <sup>*</sup>   | IGL2  | V10-2, V12-2 | J10-2/J12-2 | C10-2/C12-2 |
| OLSP18C15 <sup>^*</sup>  | IGL2  | V6b-2        | J10-2/J12-2 | C10-2/C12-2 |
| OLKI24D10                | IGL3  | V3e-3        | J4-3        | C4-3        |
| OLSP13L18                | IGL3  | V7-3         | J7-3        | C7-3        |
| OLSP39J23                | IGL3  | V9b-3        | J9-3        | C9-3        |
| OLSP28J19                | IGL3  | V10c-3       | J10b-3      | C10-3       |
| OLSP63E04                | IGL3  | V10b-3       | J10b-3      | C10-3       |
| OLKI48C02                | IGL3  | V10-3        | J10b-3      | C10-3       |
| OLKI48J14                | IGL3  | V12-3        | J10-3       | C10-3       |
| OKI53D04                 | IGL3  | V10d-3       | J10-3       | C10-3       |
| OLSP38H22                | IGL3  | V13-3        | J11-3       | C11-3       |
| OLKI10C06                | IGL3  | V11b-3       | J11-3       | C11-3       |
| OLKI33H22 <sup>^</sup>   | IGL3  | V12-3        | J11-3       | C11-3       |
| OLSP3C15                 | IGL3  | V13-3        | J14-3       | C14-3       |
| OLKI30J18 <sup>^</sup>   | IGL3  | V13-3        | J14-3       | C14-3       |
| OLKI61N09 <sup>^</sup>   | IGL3  | V11-3        | J14-3       | C14-3       |
| OLSP46D15                | IGL3  | V15-3        | J15-3       | C15-3       |
| OKI58H19 <sup>^</sup>    | IGL3  | V13-3        | J15-3       | C15-3       |
| OLKI63M21                | IGL3  | V15-3        | J15-3       | C15-3       |

<sup>^</sup> ESTs that use segments from distant clusters.

<sup>\*</sup>More than one VL, JL or CL segment can be assigned due to they present 100% homology with the germline sequence
