# Supplementary material
Source: PubMed Central journal article supplement (PMC4106372)
Supplement: NIHMS608063-supplement-Supplementary_data_6.pdf [file NIHMS608063-supplement-Supplementary_data_6.pdf]

olsp42k18 : GGAGTTTATTACTGTCAGCAGAGTAACAGCTTGTACACGTTTGGTGGAGGAACCAGACTGGAGGTTGATTTGGGTCATGTTCCCCC : 435  
V6b-2 : GGAGTTTATTACTGTCAGCAGGGTAGCAGCTTGTTCACACAGTG----- : 304  
J5-2 : -----CACTGTGGTACACGTTTGGTGGAGGAACCAGACTGGAGGTTGATT----- : 45  
C5-2 : -----TGGGTCATGTTCCCCC : 17

olsp40b17 : CAGGAGTTTATTACTGTCAGCAGAGTAACAGCTTCCGTTTACGTTTGGTGGAGGAACCAGACTGGATCTTGGAAAGTGATGTCCGTC : 435  
V4-2 : CAGGAGTTTATTACTGTCAGCAGGGTAACAGCTTCCGTTTACACAGTG----- : 307  
J4-2 : -----CACTGTGGTACACGTTTGGTGGAGGAACCAGACTGGATCTTGGAA----- : 45  
C4-2 : -----GTGATGTCCGTC : 12

olki63m21 : AGTTTATTACTGTCAGCAGTGTAAACAGCCTTCCGTTTACGTTTGGTGGAGGAACCAGACTGGAGTTTGGAAAGTGATGCCTCGCCCTT : 435  
V15-3 : AGTTTATTACTGTCAGCAGTGTAAACAGCCTTCCGTTTACACAGTG----- : 304  
J15-3 : -----CACTGTGGTACACGTTTGGTGGAGGAACCAGACTGGAGTTTGGAA----- : 45  
C15-3 : -----GTGATGCCTCGCCCTT : 16

olki48c02c : TTATTACTGTCAGAGTTATCATTACATCAACAATAAGGATGTGCTCACGTTTGGTGGAGGAACCAGACTGGATGTTGGAAGTGATG : 430  
V10-3 : TTATTACTGTCAGAGTTATCATTACATCAACAATAAGGATGTGTTTACACAGTG----- : 322  
J10b-3 : -----CACTGTGGTACACGTTTGGTGGAGGAACCAGACTGGATGTTGGAA----- : 45  
C10-3 : -----GTGATG : 6
