# Supplementary material
Source: PubMed Central journal article supplement (PMC4106372)

*Kappa (κ/L1/L3)*

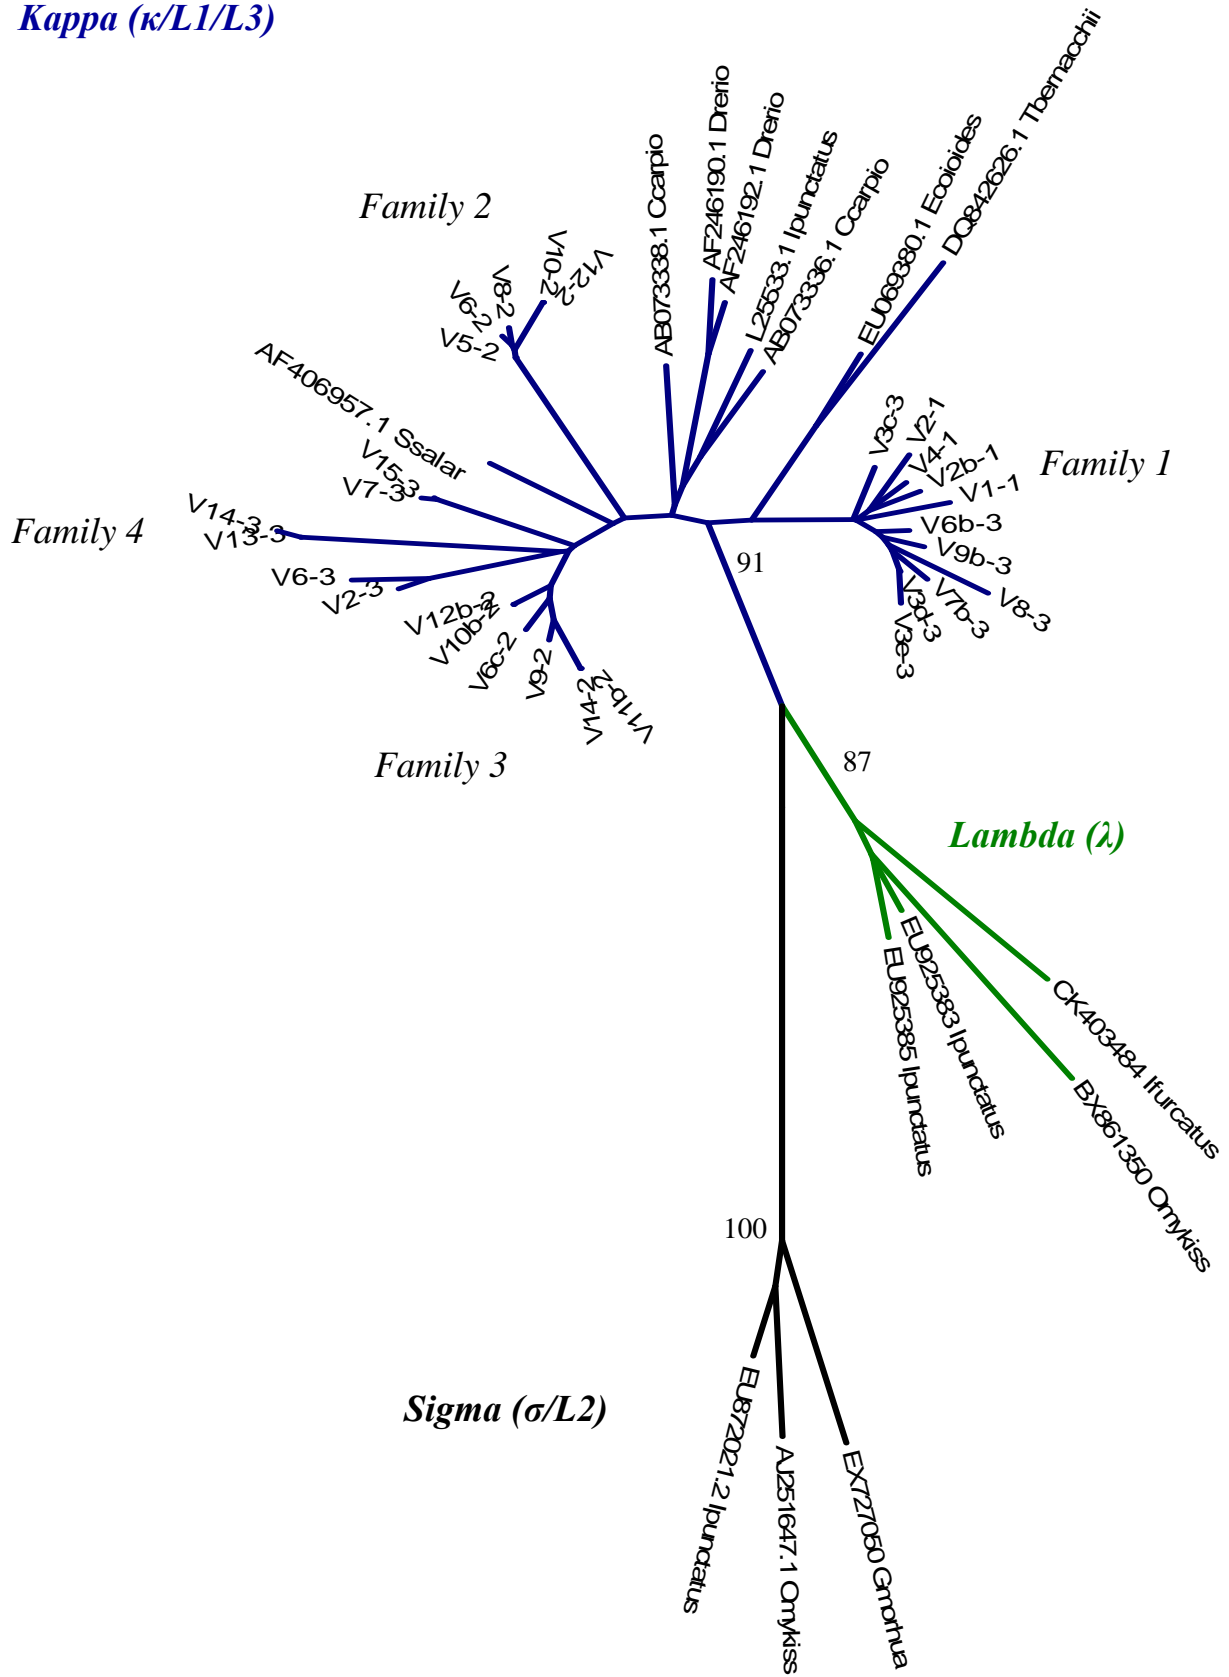

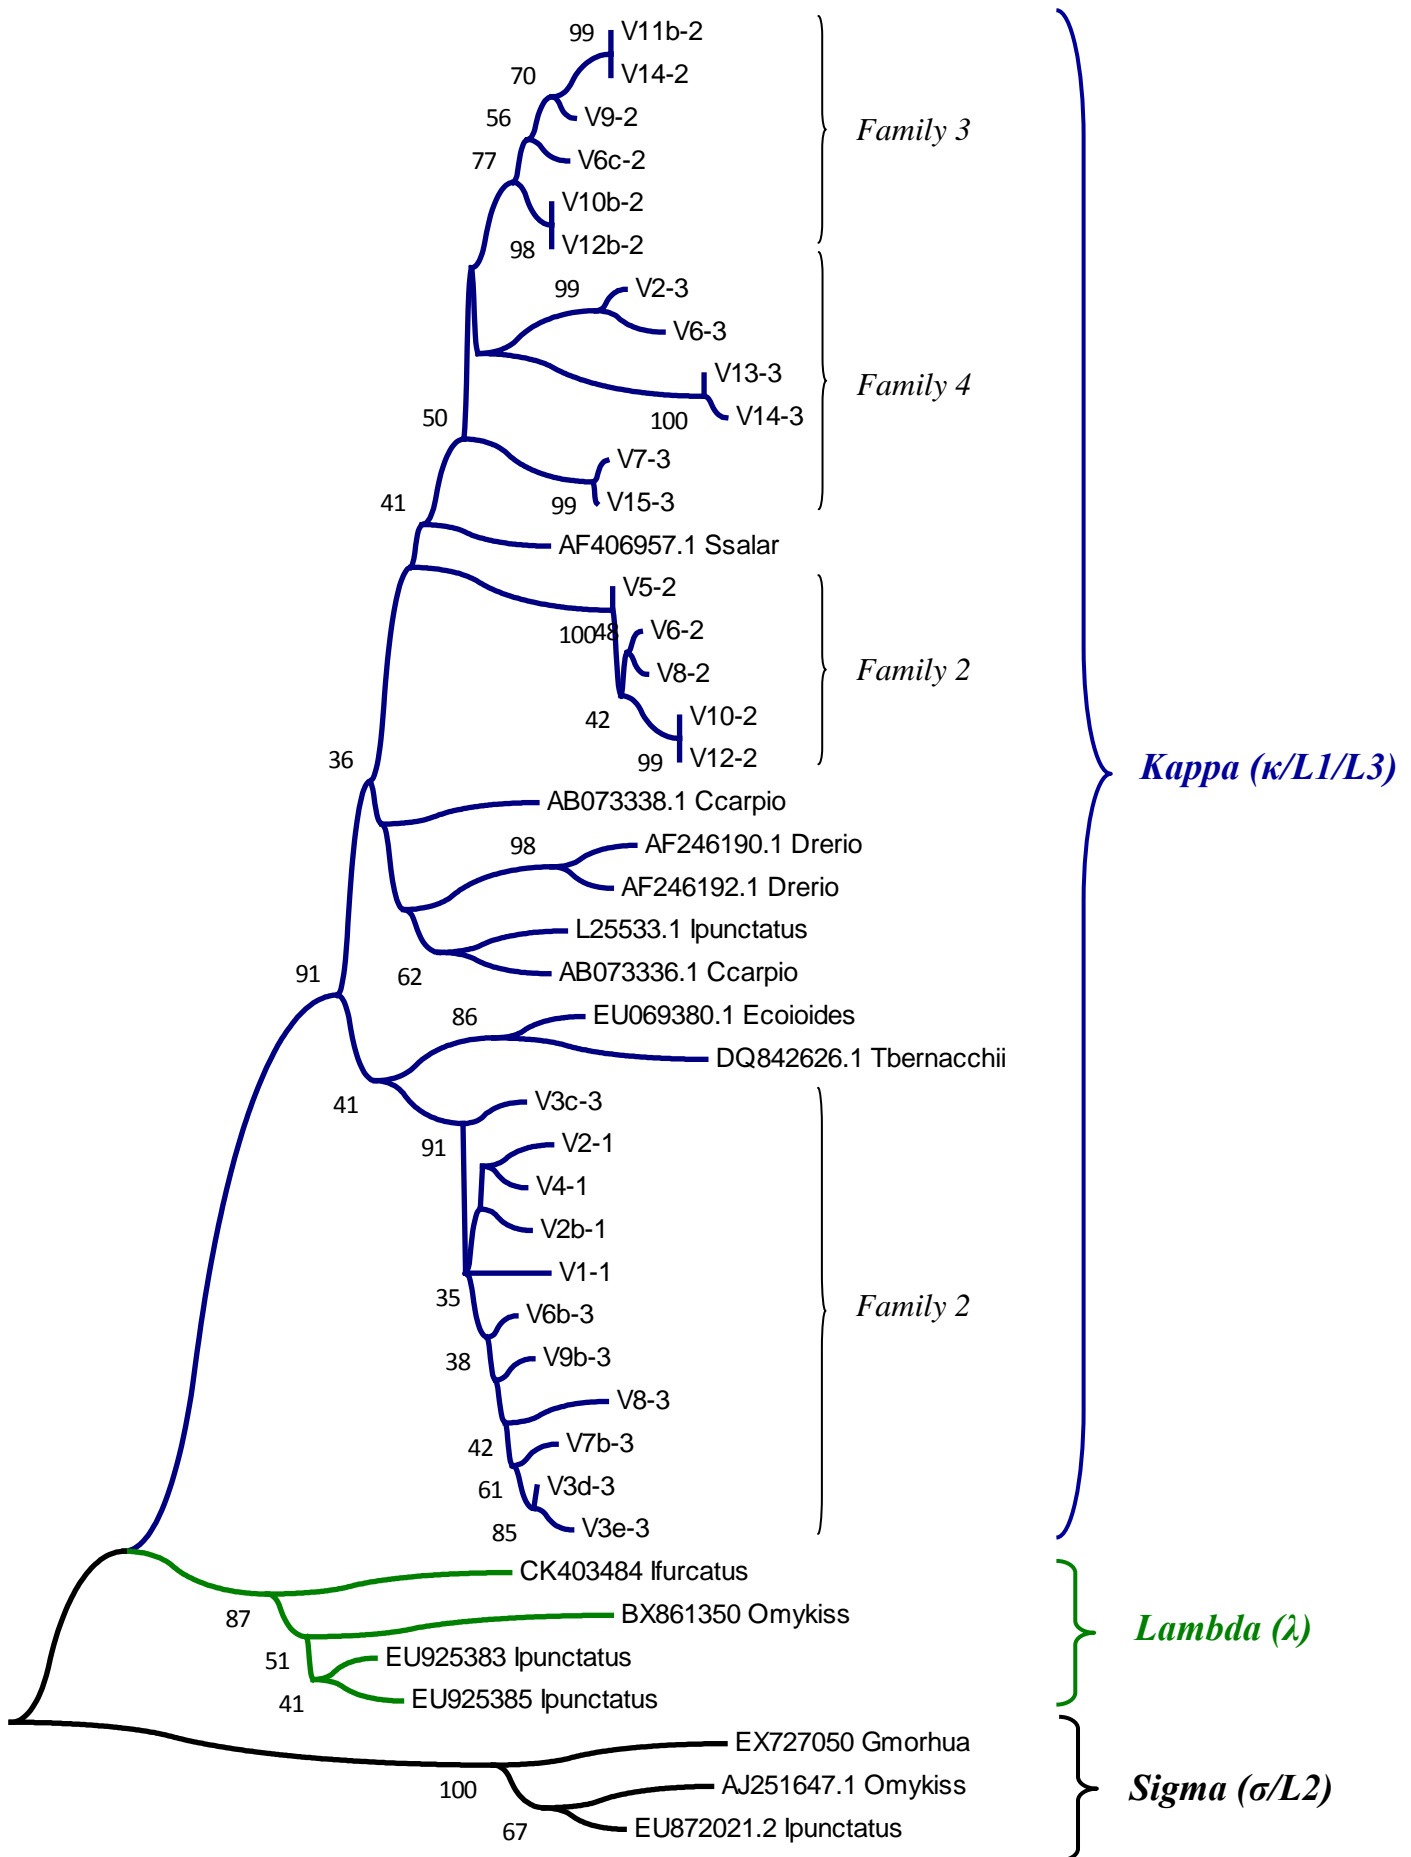

Supplement: NIHMS608063-supplement-Supplementary_data_3.pdf [file NIHMS608063-supplement-Supplementary_data_3.pdf]
